# Supplementary material for: Uncovering causal gene-tissue pairs and variants: A multivariable TWAS method controlling for infinitesimal effects
Source: Research Square preprint supplement (doi:10.21203/rs.3.rs-5285011/v1), 2024-12-10
Supplement: Supplementary file 1 [file b4b19cc584736225eb06bf6b.xlsx]

## Sheet: Content
Index	Title
Table S1	Summary of GWAS data
Table S2	Summary of eQTL and sQTL data
Table S3	Causal gene-tissue pairs identified by TGVIS
Table S4	Causal gene-tissue pairs identified by TGFM
Table S5	Direct causal variants identified by TGVIS
Table S6	Direct causal variants identified by TGFM
Table S7	Causal gene-tissue pairs being pleiotropic at gene-tissue level identified by TGVIS
Table S8	Causal gene-tissue pairs being pleiotropic at gene-tissue level identified by TGFM
Table S9	Major tissues of traits inferred by TGVIS
Table S10	Major tissues of traits inferred by TGFM
Table S11	Differential test of annotation scores
Table S12	Number of variables per credible set
Table S13	Number of xQTL per gene-tissue pairs
Table S14	Proportion of eGenes and sGenes
Table S15	Pratt indices of gene-tissue pairs, direct causal variants, and infinitesimal effects
Table S16	Colocalization of causal credible set identified by TGVIS
Table S17	Colocalization of causal credible set identified by TGFM
Table S18	Silver stander of lipid genes
Table S19	Druggable genes identified by TGVIS
Table S20	Druggable genes identified by TGFM
Table S21	Univariable Mendelian Randomization

## Sheet: Table S1
Table S1. Summary of GWAS data.
Trait	Abbreviation	SampleSize	Authors	Source 1	Source 2	Source 3
Abdominal Aortic Aneurysm	AAA	75708	Roychowdhury et al.	10.1038/s41588-023-01510-y
Alanine Aminotransferase	ALT	437267	Pazoki et al.	10.1038/s41467-021-22338-2
Albumin	ALB	322827	Sinnott-Armstrong et al.	10.1038/s41588-020-00757-z
Alkaline Phosphatase	ALP	437267	Pazoki et al.	10.1038/s41467-021-22338-2
Apolipoprotein A1	APOA1	354541	Sinnott-Armstrong et al.	10.1038/s41588-020-00757-z
Apolipoprotein B	APOB	354097	Sinnott-Armstrong et al.	10.1038/s41588-020-00757-z
Aspartate Aminotransferase	AST	355891	Pazoki et al.	10.1038/s41588-020-00757-z
Atrial Fibrillation	AF	185135	Nielsen + Finngen GWAS	10.1038/s41588-018-0171-3	10.1038/s41586-022-05473-8
Basophils	Baso	474001	Chen et al.	10.1016/j.cell.2020.06.045
Blood Urea Nitrogen	BUN	775978	Stanzick et al.	10.1038/s41467-021-24491-0
Body Mass Index	BMI	816041	UKBB + Finngen + MVP GWAS	https://www.nealelab.is/	10.1038/s41586-022-05473-8	10.1371/journal.pgen.1010193
Coronary Artery Disease	CAD	400032	Aragma et al. + MVP GWAS	10.1038/s41588-022-01233-6	10.1038/s41591-022-01891-3
Creatinine-Based eGFR	eGFR	1.03531e+06	Stanzick et al. + MVP GWAS	10.1038/s41467-021-24491-0	10.1038/s41467-019-11704-w
Cystatin C	Cystatin	355752	Sinnott-Armstrong et al.	10.1038/s41588-020-00757-z
Diastolic Blood Pressure	DBP	903567	Keaton et al.	10.1038/s41588-024-01714-w
Eosinophils	Eosino	474001	Chen et al.	10.1016/j.cell.2020.06.045
FEV1/FVC Ratio	FFratio	447751	Shrine et al.	10.1038/s41588-023-01314-0
Fasting Plasma Glucose	FPG	325125	Sinnott-Armstrong et al.	10.1038/s41588-020-00757-z
Gamma-Glutamyl Transferase	GGT	437267	Pazoki et al.	10.1038/s41467-021-22338-2
HDL Cholesterol	HDL	1.18834e+06	Graham et al.	10.1038/s41586-021-04064-3
Hemoglobin	HB	519288	Chen et al.	10.1016/j.cell.2020.06.045
Hemoglobin A1c	HBA1C	338177	Sinnott-Armstrong et al.	10.1038/s41588-020-00757-z
JT Interval	JTI	202575	Yong et al.	10.1038/s41467-022-32821-z
LDL Cholesterol	LDL	1.18176e+06	Graham et al.	10.1038/s41586-021-04064-3
Lymphocytes	LYM	524923	Chen et al.	10.1016/j.cell.2020.06.045
Monocytes	Mono	521594	Chen et al.	10.1016/j.cell.2020.06.045
Neutrophils	Neutro	519288	Chen et al.	10.1016/j.cell.2020.06.045
Platelets	PLA	542827	Chen et al.	10.1016/j.cell.2020.06.045
Pleiotropy (DBP to SBP)	PLE1	889037	GWAS are made using the method described in Zhu et al. (2022)	https://doi.org/10.1002/gepi.22440
Pleiotropy (SBP to DBP)	PLE2	889037	GWAS are made using the method described in Zhu et al. (2022)	https://doi.org/10.1002/gepi.22440
Pulse Pressure	PP	888735	Keaton et al.	10.1038/s41588-024-01714-w
QRS Complex	QRS	172606	Yong et al.	10.1038/s41467-022-32821-z
QT Interval	QTI	203745	Yong et al.	10.1038/s41467-022-32821-z
Red Blood Cells	RBC	531774	Chen et al.	10.1016/j.cell.2020.06.045
Serum Phosphate	sP	325141	Sinnott-Armstrong et al.	10.1038/s41588-020-00757-z
Sex Hormone-Binding Globulin	SHBG	322484	Sinnott-Armstrong et al.	10.1038/s41588-020-00757-z
Standing Height	HEG	786804	UKBB + Finngen + MVP GWAS	https://www.nealelab.is/	10.1038/s41586-022-05473-8	10.1371/journal.pgen.1010193
Systolic Blood Pressure	SBP	889026	Keaton et al.	10.1038/s41588-024-01714-w
Total Bilirubin	TBL	354368	Sinnott-Armstrong et al.	10.1038/s41588-020-00757-z
Total Cholesterol	TC	1.26259e+06	Graham et al.	10.1038/s41586-021-04064-3
Triglycerides	TG	1.2025e+06	Graham et al.	10.1038/s41586-021-04064-3
Type 2 Diabetes	T2D	740710	Suzuki et al.	10.1038/s41586-024-07019-6
Urate	UA	354368	Sinnott-Armstrong et al.	10.1038/s41588-020-00757-z
Venous Thromboembolism	VTE	154220	Ghouse et al. + MVP GWAS	10.1038/s41588-022-01286-7	10.1038/s41588-019-0519-3
White Blood Cells	WBC	562243	Chen et al.	10.1016/j.cell.2020.06.045

## Sheet: Table S2
Table S2. Summary of eQTL and sQTL data.
Tissue	Type	SampleSize	Authors	Source
Kidney_Glom	eQTL	240	Han et al.	10.1038/s41467-023-37691-7
Kidney_Tube	eQTL	311	Han et al.	10.1038/s41467-023-37691-7
Adipose_Subcutaneous	eQTL	147.478	GTEx Consortium	10.1126/science.aaz1776
Adipose_Visceral	eQTL	120.232	GTEx Consortium	10.1126/science.aaz1777
Adrenal_Gland	eQTL	59.5276	GTEx Consortium	10.1126/science.aaz1778
Artery_Aorta	eQTL	100.649	GTEx Consortium	10.1126/science.aaz1779
Artery_Coronary	eQTL	52.7364	GTEx Consortium	10.1126/science.aaz1780
Artery_Tibial	eQTL	144.697	GTEx Consortium	10.1126/science.aaz1781
Cerebellum	eQTL	58.3486	GTEx Consortium	10.1126/science.aaz1782
Colon_Sigmoid	eQTL	81.463	GTEx Consortium	10.1126/science.aaz1783
Colon_Transverse	eQTL	90.5432	GTEx Consortium	10.1126/science.aaz1784
Cortex	eQTL	56.2335	GTEx Consortium	10.1126/science.aaz1785
Esophagus_Junction	eQTL	83.4138	GTEx Consortium	10.1126/science.aaz1786
Esophagus_Mucosa	eQTL	125.775	GTEx Consortium	10.1126/science.aaz1787
Esophagus_Muscularis	eQTL	117.48	GTEx Consortium	10.1126/science.aaz1788
Fibroblasts	eQTL	122.41	GTEx Consortium	10.1126/science.aaz1789
Heart_Atrial_Appendage	eQTL	95.2828	GTEx Consortium	10.1126/science.aaz1790
Heart_Left_Ventricle	eQTL	99.966	GTEx Consortium	10.1126/science.aaz1791
Liver	eQTL	54.8136	GTEx Consortium	10.1126/science.aaz1792
Lung	eQTL	133.53	GTEx Consortium	10.1126/science.aaz1793
Lymphocytes	eQTL	34.3422	GTEx Consortium	10.1126/science.aaz1794
Muscle_Skeletal	eQTL	179.503	GTEx Consortium	10.1126/science.aaz1795
Nerve_Tibial	eQTL	133.883	GTEx Consortium	10.1126/science.aaz1796
Small_Intestine	eQTL	43.3722	GTEx Consortium	10.1126/science.aaz1797
Spleen	eQTL	55.2544	GTEx Consortium	10.1126/science.aaz1798
Stomach	eQTL	80.4702	GTEx Consortium	10.1126/science.aaz1799
Thyroid	eQTL	147.406	GTEx Consortium	10.1126/science.aaz1800
Whole_Blood	eQTL	168.853	GTEx Consortium	10.1126/science.aaz1801
Pancreas	eQTL	73.8415	GTEx Consortium	10.1126/science.aaz1802
Pituitary	eQTL	66.7063	GTEx Consortium	10.1126/science.aaz1803
Islets	eQTL	420	Viñuela et al.	10.1038/s41467-020-18581-8
Adipose_Visceral	sQTL	119.481	GTEx Consortium	10.1126/science.aaz1776
Colon_Sigmoid	sQTL	79.7323	GTEx Consortium	10.1126/science.aaz1777
Colon_Transverse	sQTL	89.4048	GTEx Consortium	10.1126/science.aaz1778
Esophagus_Mucosa	sQTL	124.228	GTEx Consortium	10.1126/science.aaz1779
Heart_Atrial_Appendage	sQTL	94.6334	GTEx Consortium	10.1126/science.aaz1780
Lung	sQTL	131.949	GTEx Consortium	10.1126/science.aaz1781
Pancreas	sQTL	72.3233	GTEx Consortium	10.1126/science.aaz1782
Pituitary	sQTL	76.38	GTEx Consortium	10.1126/science.aaz1783
Stomach	sQTL	79.1767	GTEx Consortium	10.1126/science.aaz1784
Thyroid	sQTL	146.514	GTEx Consortium	10.1126/science.aaz1785
Whole_Blood	sQTL	167.82	GTEx Consortium	10.1126/science.aaz1786
Adipose_Subcutaneous	sQTL	145.625	GTEx Consortium	10.1126/science.aaz1787
Artery_Aorta	sQTL	101.001	GTEx Consortium	10.1126/science.aaz1788
Artery_Tibial	sQTL	143.685	GTEx Consortium	10.1126/science.aaz1789
Esophagus_Junction	sQTL	82.4759	GTEx Consortium	10.1126/science.aaz1790
Esophagus_Muscularis	sQTL	115.892	GTEx Consortium	10.1126/science.aaz1791
Fibroblasts	sQTL	120.6	GTEx Consortium	10.1126/science.aaz1792
Heart_Left_Ventricle	sQTL	101.163	GTEx Consortium	10.1126/science.aaz1793
Muscle_Skeletal	sQTL	177.646	GTEx Consortium	10.1126/science.aaz1794
Nerve_Tibial	sQTL	132.467	GTEx Consortium	10.1126/science.aaz1795
Brain_Cortex	sQTL	55.1222	GTEx Consortium	10.1126/science.aaz1796
Liver	sQTL	48.4353	GTEx Consortium	10.1126/science.aaz1797
Small_Intestine	sQTL	39.5687	GTEx Consortium	10.1126/science.aaz1798
Spleen	sQTL	59.1244	GTEx Consortium	10.1126/science.aaz1799
Brain_Cerebellum	sQTL	63.9179	GTEx Consortium	10.1126/science.aaz1800
Adrenal_Gland	sQTL	77.9613	GTEx Consortium	10.1126/science.aaz1801

## Sheet: Table S3
Table S3. Causal gene-tissue pairs identified by TGVIS. (The scales of outcome and exposures are of GWAS and eQTL effect sizes times the square root of sample sizes, i.e., Z-score.)
Trait	Gene	Tissue	Credible Set	CS.PIP	CS.Pratt	Estimate	SE	PIP	Pratt	xQTL
Abdominal Aortic Aneurysm	NMNAT1	Adipose_Visceral	1:9438175:CS2	0.986006	0.0771013	1.70844	1.87886	0.466197	0.0363348	rs9442580
Abdominal Aortic Aneurysm	chr1:9235066:9244925:clu_45084:ENSG00000049239.12	Artery_Aorta	1:9438175:CS2	0.986006	0.0771013	-0.520093	0.505507	0.519809	0.0407665	rs75737595~rs9442580
Abdominal Aortic Aneurysm	SPSB1	Nerve_Tibial	1:9438175:CS3	0.990141	0.0248897	1.15038	0.287668	0.990141	0.0248897	rs114709597
Abdominal Aortic Aneurysm	CELSR2	Liver	1:109817590:CS1	0.964752	0.249327	-0.234014	0.719864	0.0964752	0.0249327	rs7528419
Abdominal Aortic Aneurysm	CELSR2	Pancreas	1:109817590:CS1	0.964752	0.249327	-0.290813	0.893514	0.0964752	0.0249327	rs7528419
Abdominal Aortic Aneurysm	PSRC1	Brain_Cortex	1:109817590:CS1	0.964752	0.249327	-0.33972	1.06337	0.0964752	0.0249327	rs7528419
Abdominal Aortic Aneurysm	PSRC1	Esophagus_Mucosa	1:109817590:CS1	0.964752	0.249327	-0.190812	0.55627	0.0964752	0.0249327	rs7528419
Abdominal Aortic Aneurysm	PSRC1	Fibroblasts	1:109817590:CS1	0.964752	0.249327	-0.306296	0.932987	0.0964752	0.0249327	rs7528419
Abdominal Aortic Aneurysm	PSRC1	Heart_Left_Ventricle	1:109817590:CS1	0.964752	0.249327	-0.415509	1.33178	0.0964752	0.0249327	rs7528419
Abdominal Aortic Aneurysm	PSRC1	Liver	1:109817590:CS1	0.964752	0.249327	-0.225133	0.684901	0.0964752	0.0249327	rs7528419
Abdominal Aortic Aneurysm	PSRC1	Nerve_Tibial	1:109817590:CS1	0.964752	0.249327	-0.364803	1.17911	0.0964752	0.0249327	rs7528419
Abdominal Aortic Aneurysm	PSRC1	Whole_Blood	1:109817590:CS1	0.964752	0.249327	-0.222813	0.682027	0.0964752	0.0249327	rs7528419
Abdominal Aortic Aneurysm	SORT1	Liver	1:109817590:CS1	0.964752	0.249327	-0.222405	0.661456	0.0964752	0.0249327	rs7528419
Abdominal Aortic Aneurysm	IL6R	Artery_Tibial	1:154425456:CS1	1	0.173386	0.173484	0.530401	0.0909091	0.0157623	rs61812598
Abdominal Aortic Aneurysm	chr1:153990802:153990914:clu_42933:ENSG00000177954.11	Whole_Blood	1:154425456:CS1	1	0.173386	-0.51475	1.69127	0.0909091	0.0157623	rs61812598
Abdominal Aortic Aneurysm	chr1:154448171:154449911:clu_58019:ENSG00000160712.12	Lung	1:154425456:CS1	1	0.173386	-0.85384	2.91627	0.0909091	0.0157623	rs61812598
Abdominal Aortic Aneurysm	chr1:154449980:154465134:clu_42965:ENSG00000160712.12	Whole_Blood	1:154425456:CS1	1	0.173386	-0.151204	0.493169	0.0909091	0.0157623	rs61812598
Abdominal Aortic Aneurysm	chr1:154449980:154465134:clu_48468:ENSG00000160712.12	Muscle_Skeletal	1:154425456:CS1	1	0.173386	-0.188716	0.663683	0.0909091	0.0157623	rs61812598
Abdominal Aortic Aneurysm	chr1:154449980:154465134:clu_58019:ENSG00000160712.12	Lung	1:154425456:CS1	1	0.173386	-0.202765	0.666383	0.0909091	0.0157623	rs61812598
Abdominal Aortic Aneurysm	chr1:154454581:154465134:clu_58019:ENSG00000160712.12	Lung	1:154425456:CS1	1	0.173386	0.371784	1.13996	0.0909091	0.0157623	rs61812598
Abdominal Aortic Aneurysm	chr1:154470362:154485943:clu_58021:ENSG00000169291.9	Lung	1:154425456:CS1	1	0.173386	-0.304047	0.925243	0.0909091	0.0157623	rs61812598
Abdominal Aortic Aneurysm	chr1:154470362:154485943:clu_58473:ENSG00000169291.9	Thyroid	1:154425456:CS1	1	0.173386	-0.564468	1.64055	0.0909091	0.0157623	rs61812598
Abdominal Aortic Aneurysm	chr1:154484335:154485943:clu_58473:ENSG00000169291.9	Thyroid	1:154425456:CS1	1	0.173386	1.044	3.08601	0.0909091	0.0157623	rs61812598
Abdominal Aortic Aneurysm	chr1:154541108:154542024:clu_46893:ENSG00000163239.12	Small_Intestine	1:154425456:CS1	1	0.173386	-1.31472	3.84596	0.0909091	0.0157623	rs61812598
Abdominal Aortic Aneurysm	chr1:172394410:172397164:clu_56997:ENSG00000135845.9	Nerve_Tibial	1:172333448:CS1	0.999904	0.116085	-0.904801	0.940841	0.499952	0.0580427	rs2227200
Abdominal Aortic Aneurysm	chr1:172394410:172399819:clu_44686:ENSG00000135845.9	Fibroblasts	1:172333448:CS1	0.999904	0.116085	-1.06743	1.09042	0.499952	0.0580427	rs2227200
Abdominal Aortic Aneurysm	SMYD2	Brain_Cerebellum	1:214405605:CS1	1	0.367329	-2.47065	0.267394	1	0.367329	rs1660364
Abdominal Aortic Aneurysm	GPATCH2	Colon_Transverse	1:218615451:CS1	0.996573	0.255937	-1.04012	1.45951	0.332191	0.0853123	rs991967
Abdominal Aortic Aneurysm	TGFB2	Kidney_Glom	1:218615451:CS1	0.996573	0.255937	-0.744495	1.09567	0.332191	0.0853123	rs991967
Abdominal Aortic Aneurysm	chr1:217492693:217495015:clu_48688:ENSG00000092978.10	Stomach	1:218615451:CS1	0.996573	0.255937	5.2469	7.67013	0.332191	0.0853123	rs991967
Abdominal Aortic Aneurysm	chr2:20327378:20350597:clu_40950:ENSG00000055917.15	Colon_Sigmoid	2:20878105:CS1	0.976608	0.195454	-8.6661	1.90248	0.976608	0.195454	rs9306894
Abdominal Aortic Aneurysm	chr2:47024359:47029224:clu_37161:ENSG00000068724.15	Whole_Blood	2:46758015:CS1	0.999726	0.0677181	-2.47519	0.445587	0.999726	0.0677181	rs72800535
Abdominal Aortic Aneurysm	ENSG00000235319	Pituitary	2:105911258:CS1	0.996405	0.0986358	-1.01821	1.04005	0.498203	0.0493179	rs2576748
Abdominal Aortic Aneurysm	ENSG00000272994	Brain_Cerebellum	2:105911258:CS1	0.996405	0.0986358	-0.545028	0.561141	0.498203	0.0493179	rs2576748
Abdominal Aortic Aneurysm	ENSG00000259863	Artery_Aorta	2:109806197:CS1	0.999565	0.0944757	0.0420565	0.168902	0.0615828	0.00552491	rs72836527~rs72836575~rs4676260
Abdominal Aortic Aneurysm	ENSG00000259863	Artery_Coronary	2:109806197:CS1	0.999565	0.0944757	0.241013	0.626413	0.147749	0.014117	rs4676260
Abdominal Aortic Aneurysm	ENSG00000259863	Artery_Tibial	2:109806197:CS1	0.999565	0.0944757	0.0916281	0.335195	0.0859976	0.00795184	rs11676676~rs4676260
Abdominal Aortic Aneurysm	ENSG00000259863	Muscle_Skeletal	2:109806197:CS1	0.999565	0.0944757	0.157914	0.375323	0.147749	0.014117	rs4676260
Abdominal Aortic Aneurysm	SH3RF3	Artery_Aorta	2:109806197:CS1	0.999565	0.0944757	0.108212	0.28376	0.147749	0.014117	rs4676260
Abdominal Aortic Aneurysm	SH3RF3	Artery_Coronary	2:109806197:CS1	0.999565	0.0944757	0.182019	0.419771	0.147749	0.014117	rs4676260
Abdominal Aortic Aneurysm	SH3RF3	Artery_Tibial	2:109806197:CS1	0.999565	0.0944757	0.098282	0.237933	0.113238	0.0104141	rs4676260~rs9286346
Abdominal Aortic Aneurysm	SH3RF3	Muscle_Skeletal	2:109806197:CS1	0.999565	0.0944757	0.157692	0.388105	0.147749	0.014117	rs4676260
Abdominal Aortic Aneurysm	chr2:161318873:161367478:clu_42849:ENSG00000115233.11	Heart_Atrial_Appendage	2:163237390:CS2	0.986542	0.162769	7.66392	1.93988	0.986542	0.162769	rs141102226
Abdominal Aortic Aneurysm	ENSG00000261379	Adipose_Subcutaneous	2:227105752:CS1	1.01701	0.15206	-0.204662	0.411984	0.203403	0.0304119	rs2176040
Abdominal Aortic Aneurysm	ENSG00000272622	Adipose_Subcutaneous	2:227105752:CS1	1.01701	0.15206	-0.18428	0.372683	0.203403	0.0304119	rs2176040
Abdominal Aortic Aneurysm	ENSG00000272622	Adipose_Visceral	2:227105752:CS1	1.01701	0.15206	-0.59429	1.22939	0.203403	0.0304119	rs2176040
Abdominal Aortic Aneurysm	IRS1	Adipose_Subcutaneous	2:227105752:CS1	1.01701	0.15206	-0.137983	0.289655	0.203403	0.0304119	rs2176040
Abdominal Aortic Aneurysm	IRS1	Adipose_Visceral	2:227105752:CS1	1.01701	0.15206	-0.196045	0.396013	0.203403	0.0304119	rs2176040
Abdominal Aortic Aneurysm	ZBTB38	Adipose_Subcutaneous	3:141105570:CS1	0.965794	0.119856	-0.0334828	0.214523	0.0292665	0.00363199	rs724016
Abdominal Aortic Aneurysm	ZBTB38	Adipose_Visceral	3:141105570:CS1	0.965794	0.119856	-0.0709073	0.425634	0.0292665	0.00363199	rs724016
Abdominal Aortic Aneurysm	ZBTB38	Artery_Tibial	3:141105570:CS1	0.965794	0.119856	-0.0433732	0.214083	0.0292665	0.00363199	rs724016
Abdominal Aortic Aneurysm	ZBTB38	Esophagus_Junction	3:141105570:CS1	0.965794	0.119856	-0.0517994	0.321012	0.0292665	0.00363199	rs724016
Abdominal Aortic Aneurysm	ZBTB38	Esophagus_Muscularis	3:141105570:CS1	0.965794	0.119856	-0.0674362	0.328979	0.0292665	0.00363199	rs724016
Abdominal Aortic Aneurysm	ZBTB38	Heart_Atrial_Appendage	3:141105570:CS1	0.965794	0.119856	-0.0785852	0.513813	0.0292665	0.00363199	rs724016
Abdominal Aortic Aneurysm	ZBTB38	Muscle_Skeletal	3:141105570:CS1	0.965794	0.119856	-0.0516848	0.267724	0.0292665	0.00363199	rs724016
Abdominal Aortic Aneurysm	ZBTB38	Nerve_Tibial	3:141105570:CS1	0.965794	0.119856	-0.0505244	0.228095	0.0292665	0.00363199	rs724016
Abdominal Aortic Aneurysm	ZBTB38	Spleen	3:141105570:CS1	0.965794	0.119856	-0.0877408	0.527217	0.0292665	0.00363199	rs724016
Abdominal Aortic Aneurysm	ZBTB38	Thyroid	3:141105570:CS1	0.965794	0.119856	-0.0319147	0.135226	0.0292665	0.00363199	rs724016
Abdominal Aortic Aneurysm	chr3:141386937:141396259:clu_39976:ENSG00000177311.11	Artery_Aorta	3:141105570:CS1	0.965794	0.119856	0.0395913	0.262303	0.0292665	0.00363199	rs724016
Abdominal Aortic Aneurysm	chr3:141386937:141396259:clu_40171:ENSG00000177311.11	Muscle_Skeletal	3:141105570:CS1	0.965794	0.119856	0.0394554	0.182576	0.0292665	0.00363199	rs724016
Abdominal Aortic Aneurysm	chr3:141386937:141396259:clu_41890:ENSG00000177311.11	Artery_Tibial	3:141105570:CS1	0.965794	0.119856	0.0247271	0.121713	0.0292665	0.00363199	rs724016
Abdominal Aortic Aneurysm	chr3:141386937:141396259:clu_43160:ENSG00000177311.11	Colon_Transverse	3:141105570:CS1	0.965794	0.119856	0.0575567	0.399929	0.0292665	0.00363199	rs724016
Abdominal Aortic Aneurysm	chr3:141386937:141396259:clu_45318:ENSG00000177311.11	Adipose_Subcutaneous	3:141105570:CS1	0.965794	0.119856	0.0345599	0.240754	0.0292665	0.00363199	rs724016
Abdominal Aortic Aneurysm	chr3:141386937:141396259:clu_48090:ENSG00000177311.11	Lung	3:141105570:CS1	0.965794	0.119856	0.0356522	0.234677	0.0292665	0.00363199	rs724016
Abdominal Aortic Aneurysm	chr3:141386937:141403927:clu_36557:ENSG00000177311.11	Fibroblasts	3:141105570:CS1	0.965794	0.119856	-0.0308566	0.146193	0.0292665	0.00363199	rs724016
Abdominal Aortic Aneurysm	chr3:141386937:141403927:clu_40171:ENSG00000177311.11	Muscle_Skeletal	3:141105570:CS1	0.965794	0.119856	-0.0431362	0.241226	0.0292665	0.00363199	rs724016
Abdominal Aortic Aneurysm	chr3:141386937:141403927:clu_41890:ENSG00000177311.11	Artery_Tibial	3:141105570:CS1	0.965794	0.119856	-0.0575458	0.262401	0.0292665	0.00363199	rs724016
Abdominal Aortic Aneurysm	chr3:141386937:141403927:clu_48090:ENSG00000177311.11	Lung	3:141105570:CS1	0.965794	0.119856	-0.0876538	0.491605	0.0292665	0.00363199	rs724016
Abdominal Aortic Aneurysm	chr3:141396503:141403927:clu_36557:ENSG00000177311.11	Fibroblasts	3:141105570:CS1	0.965794	0.119856	0.0246251	0.128388	0.0292665	0.00363199	rs724016
Abdominal Aortic Aneurysm	chr3:141396503:141403927:clu_39976:ENSG00000177311.11	Artery_Aorta	3:141105570:CS1	0.965794	0.119856	0.0347132	0.178064	0.0292665	0.00363199	rs724016
Abdominal Aortic Aneurysm	chr3:141396503:141403927:clu_40171:ENSG00000177311.11	Muscle_Skeletal	3:141105570:CS1	0.965794	0.119856	0.0316116	0.205536	0.0292665	0.00363199	rs724016
Abdominal Aortic Aneurysm	chr3:141396503:141403927:clu_41890:ENSG00000177311.11	Artery_Tibial	3:141105570:CS1	0.965794	0.119856	0.0286135	0.169384	0.0292665	0.00363199	rs724016
Abdominal Aortic Aneurysm	chr3:141396503:141403927:clu_42984:ENSG00000177311.11	Pituitary	3:141105570:CS1	0.965794	0.119856	0.16649	1.0592	0.0292665	0.00363199	rs724016
Abdominal Aortic Aneurysm	chr3:141396503:141403927:clu_44052:ENSG00000177311.11	Adipose_Visceral	3:141105570:CS1	0.965794	0.119856	0.108843	0.592206	0.0292665	0.00363199	rs724016
Abdominal Aortic Aneurysm	chr3:141396503:141403927:clu_45318:ENSG00000177311.11	Adipose_Subcutaneous	3:141105570:CS1	0.965794	0.119856	0.0732768	0.421139	0.0292665	0.00363199	rs724016
Abdominal Aortic Aneurysm	chr3:141396503:141403927:clu_46644:ENSG00000177311.11	Nerve_Tibial	3:141105570:CS1	0.965794	0.119856	0.0405326	0.237173	0.0292665	0.00363199	rs724016
Abdominal Aortic Aneurysm	chr3:141396503:141403927:clu_48090:ENSG00000177311.11	Lung	3:141105570:CS1	0.965794	0.119856	0.0376445	0.304258	0.0292665	0.00363199	rs724016
Abdominal Aortic Aneurysm	chr3:141396503:141403927:clu_48433:ENSG00000177311.11	Thyroid	3:141105570:CS1	0.965794	0.119856	0.0357319	0.245162	0.0292665	0.00363199	rs724016
Abdominal Aortic Aneurysm	chr3:141402449:141403927:clu_39976:ENSG00000177311.11	Artery_Aorta	3:141105570:CS1	0.965794	0.119856	-0.0648875	0.441188	0.0292665	0.00363199	rs724016
Abdominal Aortic Aneurysm	chr3:141402449:141403927:clu_48090:ENSG00000177311.11	Lung	3:141105570:CS1	0.965794	0.119856	-0.0444105	0.232597	0.0292665	0.00363199	rs724016
Abdominal Aortic Aneurysm	chr3:142198933:142204695:clu_34399:ENSG00000175066.15	Pancreas	3:141105570:CS1	0.965794	0.119856	-0.115604	0.714963	0.0292665	0.00363199	rs724016
Abdominal Aortic Aneurysm	chr3:170136665:170145423:clu_35876:ENSG00000173889.15	Whole_Blood	3:169477506:CS0	0.869159	0.0854272	-2.34405	1.06985	0.869159	0.0854272	rs16854335
Abdominal Aortic Aneurysm	MECOM	Thyroid	3:169477506:CS2	0.968697	0.0601531	-0.849838	0.269462	0.968697	0.0601531	rs16852912
Abdominal Aortic Aneurysm	LDB2	Esophagus_Muscularis	4:16885455:CS1	0.99732	0.086221	0.942851	1.10127	0.452958	0.0405596	rs10939692
Abdominal Aortic Aneurysm	LDB2	Pancreas	4:16885455:CS1	0.99732	0.086221	0.102114	0.254635	0.135824	0.0108545	rs10939692~rs115490140
Abdominal Aortic Aneurysm	LDB2	Spleen	4:16885455:CS1	0.99732	0.086221	1.19277	1.47138	0.408538	0.0348069	rs10939692~rs9998599
Abdominal Aortic Aneurysm	GSX2	Brain_Cortex	4:54590469:CS1	0.999981	0.174443	10.4745	1.4923	0.999981	0.174443	rs2590830
Abdominal Aortic Aneurysm	SPP1	Adipose_Subcutaneous	4:88775160:CS1	0.999766	0.107376	-0.296164	0.51403	0.250547	0.0268089	rs9998898
Abdominal Aortic Aneurysm	SPP1	Artery_Tibial	4:88775160:CS1	0.999766	0.107376	-0.275476	0.48092	0.250547	0.0268089	rs9998898
Abdominal Aortic Aneurysm	SPP1	Heart_Left_Ventricle	4:88775160:CS1	0.999766	0.107376	-0.573622	0.944829	0.250547	0.0268089	rs9998898
Abdominal Aortic Aneurysm	SPP1	Nerve_Tibial	4:88775160:CS1	0.999766	0.107376	-0.219214	0.409577	0.248125	0.026949	rs9998898~rs11728697
Abdominal Aortic Aneurysm	chr4:99300370:99300951:clu_41692:ENSG00000246090.6	Adipose_Subcutaneous	4:100284685:CS1	0.98884	0.1061	-1.17463	0.208227	0.98884	0.1061	rs34394283~rs1693435
Abdominal Aortic Aneurysm	NFKB1	Fibroblasts	4:103411099:CS1	0.999873	0.173176	0.191452	0.485956	0.142839	0.0247394	rs2125213
Abdominal Aortic Aneurysm	NFKB1	Kidney_Glom	4:103411099:CS1	0.999873	0.173176	0.190602	0.444166	0.142839	0.0247394	rs2125213
Abdominal Aortic Aneurysm	NFKB1	Whole_Blood	4:103411099:CS1	0.999873	0.173176	0.191942	0.455338	0.142839	0.0247394	rs2125213
Abdominal Aortic Aneurysm	chr4:102501788:102525512:clu_33545:ENSG00000109320.11	Fibroblasts	4:103411099:CS1	0.999873	0.173176	-0.168679	0.419166	0.142839	0.0247394	rs2125213
Abdominal Aortic Aneurysm	chr4:102809855:102825239:clu_32355:ENSG00000109332.19	Adrenal_Gland	4:103411099:CS1	0.999873	0.173176	-0.629141	1.64683	0.142839	0.0247394	rs2125213
Abdominal Aortic Aneurysm	chr4:102809855:102826485:clu_32355:ENSG00000109332.19	Adrenal_Gland	4:103411099:CS1	0.999873	0.173176	0.562619	1.42317	0.142839	0.0247394	rs2125213
Abdominal Aortic Aneurysm	chr4:103082929:103086480:clu_42845:ENSG00000164038.14	Nerve_Tibial	4:103411099:CS1	0.999873	0.173176	-0.903508	2.27232	0.142839	0.0247394	rs2125213
Abdominal Aortic Aneurysm	ZNF827	Adipose_Visceral	4:146809016:CS1	0.986899	0.14565	5.10448	1.22437	0.986899	0.14565	rs7662069
Abdominal Aortic Aneurysm	SLC10A7	Pituitary	4:146809016:CS2	0.971993	0.0799516	0.0641309	0.261715	0.062143	0.00387859	rs7439492~rs12510723
Abdominal Aortic Aneurysm	chr4:146175811:146182912:clu_43357:ENSG00000164167.10	Nerve_Tibial	4:146809016:CS2	0.971993	0.0799516	-2.99614	3.54	0.454925	0.0380365	rs9784489
Abdominal Aortic Aneurysm	chr4:146256520:146256826:clu_31957:ENSG00000120519.14	Pancreas	4:146809016:CS2	0.971993	0.0799516	-2.06737	2.4063	0.454925	0.0380365	rs9784489
Abdominal Aortic Aneurysm	chr5:865581:868607:clu_29933:ENSG00000028310.17	Whole_Blood	5:1286516:CS1	0.999963	0.0405728	1.47354	0.611667	0.876084	0.0355618	rs2736100
Abdominal Aortic Aneurysm	chr5:52788414:52799889:clu_40354:ENSG00000152684.10	Lung	5:52723007:CS2	0.996044	0.0836485	0.510904	0.540319	0.498022	0.0418243	rs11747359
Abdominal Aortic Aneurysm	chr5:52788414:52799889:clu_40354:ENSG00000213949.8	Lung	5:52723007:CS2	0.996044	0.0836485	0.510572	0.533559	0.498022	0.0418243	rs11747359
Abdominal Aortic Aneurysm	chr5:55664863:55669228:clu_38258:ENSG00000177058.11	Adipose_Subcutaneous	5:55806751:CS1	0.999993	0.157527	-3.30438	3.41784	0.499996	0.0787636	rs459193
Abdominal Aortic Aneurysm	chr5:55669321:55669557:clu_38258:ENSG00000177058.11	Adipose_Subcutaneous	5:55806751:CS1	0.999993	0.157527	2.65868	2.71908	0.499996	0.0787636	rs459193
Abdominal Aortic Aneurysm	ANKDD1B	Islets	5:74651084:CS1	0.95902	0.0668392	-0.0178938	0.13739	0.0145207	0.000857927	rs73125245~rs1115091
Abdominal Aortic Aneurysm	ANKDD1B	Kidney_Glom	5:74651084:CS1	0.95902	0.0668392	0.0628549	0.260716	0.0622747	0.00434932	rs3843482
Abdominal Aortic Aneurysm	CERT1	Esophagus_Mucosa	5:74651084:CS1	0.95902	0.0668392	-0.050637	0.197104	0.0622747	0.00434932	rs3843482
Abdominal Aortic Aneurysm	ENSG00000271815	Colon_Transverse	5:74651084:CS1	0.95902	0.0668392	-0.282702	1.11293	0.0622747	0.00434932	rs3843482
Abdominal Aortic Aneurysm	HMGCR	Brain_Cortex	5:74651084:CS1	0.95902	0.0668392	0.0405619	0.232761	0.015202	0.000858527	rs1115091
Abdominal Aortic Aneurysm	HMGCR	Muscle_Skeletal	5:74651084:CS1	0.95902	0.0668392	0.0593939	0.236698	0.0622747	0.00434932	rs3843482
Abdominal Aortic Aneurysm	POLK	Adipose_Subcutaneous	5:74651084:CS1	0.95902	0.0668392	0.134331	0.604696	0.0622747	0.00434932	rs3843482
Abdominal Aortic Aneurysm	POLK	Brain_Cerebellum	5:74651084:CS1	0.95902	0.0668392	0.179285	0.733494	0.0622747	0.00434932	rs3843482
Abdominal Aortic Aneurysm	POLK	Kidney_Tube	5:74651084:CS1	0.95902	0.0668392	-0.100148	0.36558	0.0622747	0.00434932	rs3843482
Abdominal Aortic Aneurysm	POLK	Lung	5:74651084:CS1	0.95902	0.0668392	0.0931254	0.379795	0.0622747	0.00434932	rs3843482
Abdominal Aortic Aneurysm	chr5:75354697:75355056:clu_33542:ENSG00000113161.15	Heart_Atrial_Appendage	5:74651084:CS1	0.95902	0.0668392	0.199412	0.639647	0.104524	0.00772315	rs1115091~rs3843482
Abdominal Aortic Aneurysm	chr5:75354697:75355056:clu_35283:ENSG00000113161.15	Esophagus_Mucosa	5:74651084:CS1	0.95902	0.0668392	0.0349544	0.358143	0.015202	0.000858527	rs1115091
Abdominal Aortic Aneurysm	chr5:75354697:75355056:clu_39589:ENSG00000113161.15	Nerve_Tibial	5:74651084:CS1	0.95902	0.0668392	0.174321	0.75781	0.0622747	0.00434932	rs3843482
Abdominal Aortic Aneurysm	chr5:75354697:75355365:clu_30007:ENSG00000113161.15	Adrenal_Gland	5:74651084:CS1	0.95902	0.0668392	-0.205472	0.888408	0.0622747	0.00434932	rs3843482
Abdominal Aortic Aneurysm	chr5:75354697:75355365:clu_31006:ENSG00000113161.15	Fibroblasts	5:74651084:CS1	0.95902	0.0668392	-0.0623252	0.226615	0.0622747	0.00434932	rs3843482
Abdominal Aortic Aneurysm	chr5:75354697:75355365:clu_34063:ENSG00000113161.15	Muscle_Skeletal	5:74651084:CS1	0.95902	0.0668392	-0.0762751	0.329636	0.0622747	0.00434932	rs3843482
Abdominal Aortic Aneurysm	chr5:75354697:75355365:clu_35283:ENSG00000113161.15	Esophagus_Mucosa	5:74651084:CS1	0.95902	0.0668392	-0.0493897	0.213851	0.0622747	0.00434932	rs3843482
Abdominal Aortic Aneurysm	chr5:77463226:77489457:clu_39646:ENSG00000164253.13	Nerve_Tibial	5:77881710:CS1	0.997919	0.0961029	0.384791	0.769149	0.212012	0.0204737	rs10076149
Abdominal Aortic Aneurysm	chr5:78510398:78564813:clu_29437:ENSG00000145685.13	Pancreas	5:77881710:CS1	0.997919	0.0961029	-0.32761	0.624566	0.212012	0.0204737	rs10076149
Abdominal Aortic Aneurysm	chr5:78510398:78564813:clu_36632:ENSG00000145685.13	Pituitary	5:77881710:CS1	0.997919	0.0961029	-0.487079	0.938399	0.212012	0.0204737	rs10076149
Abdominal Aortic Aneurysm	chr5:78550906:78564813:clu_31050:ENSG00000145685.13	Fibroblasts	5:77881710:CS1	0.997919	0.0961029	0.114956	0.299024	0.14987	0.0142081	rs10076149~rs10037983
Abdominal Aortic Aneurysm	chr5:78632368:78648499:clu_41245:ENSG00000145685.13	Thyroid	5:77881710:CS1	0.997919	0.0961029	-0.774717	1.52434	0.212012	0.0204737	rs10076149
Abdominal Aortic Aneurysm	chr5:83512396:83519349:clu_31127:ENSG00000038427.15	Fibroblasts	5:82810884:CS1	0.998483	0.251428	-1.16214	1.57047	0.332828	0.0838092	rs34580448
Abdominal Aortic Aneurysm	chr5:83522309:83537007:clu_31127:ENSG00000038427.15	Fibroblasts	5:82810884:CS1	0.998483	0.251428	-0.39479	0.5669	0.332828	0.0838092	rs34580448
Abdominal Aortic Aneurysm	chr5:83522309:83537007:clu_34103:ENSG00000038427.15	Artery_Aorta	5:82810884:CS1	0.998483	0.251428	-0.447385	0.665896	0.332828	0.0838092	rs34580448
Abdominal Aortic Aneurysm	FER	Artery_Aorta	5:108191536:CS1	0.983015	0.151233	0.590909	0.336322	0.801922	0.12968	rs76112574~rs6594334~rs6889967
Abdominal Aortic Aneurysm	FER	Artery_Coronary	5:108191536:CS1	0.983015	0.151233	0.04345	0.280335	0.0326793	0.00328221	rs6594334~rs6889967~rs7731891
Abdominal Aortic Aneurysm	FER	Artery_Tibial	5:108191536:CS1	0.983015	0.151233	0.0177989	0.0985894	0.0372299	0.00381907	rs12719094~rs17391678~rs6889967~rs17450345
Abdominal Aortic Aneurysm	chr5:109789048:109789460:clu_41195:ENSG00000112893.9	Lung	5:108191536:CS1	0.983015	0.151233	-0.0426305	0.340276	0.0300331	0.0028079	rs6594334~rs57885979
Abdominal Aortic Aneurysm	chr6:36678798:36680474:clu_28508:ENSG00000124762.13	Fibroblasts	6:36648816:CS1	0.957512	0.0417826	0.0336659	0.155391	0.0416309	0.00181664	rs4135240
Abdominal Aortic Aneurysm	chr6:36678798:36680474:clu_31413:ENSG00000124762.13	Artery_Aorta	6:36648816:CS1	0.957512	0.0417826	0.122789	0.576822	0.0416309	0.00181664	rs4135240
Abdominal Aortic Aneurysm	chr6:36678798:36680474:clu_32702:ENSG00000124762.13	Esophagus_Mucosa	6:36648816:CS1	0.957512	0.0417826	0.0896679	0.461065	0.0416309	0.00181664	rs4135240
Abdominal Aortic Aneurysm	chr6:36678798:36680474:clu_32758:ENSG00000124762.13	Artery_Tibial	6:36648816:CS1	0.957512	0.0417826	0.043851	0.230015	0.0416309	0.00181664	rs4135240
Abdominal Aortic Aneurysm	chr6:36678798:36680474:clu_34556:ENSG00000124762.13	Adipose_Visceral	6:36648816:CS1	0.957512	0.0417826	0.044458	0.224886	0.0416309	0.00181664	rs4135240
Abdominal Aortic Aneurysm	chr6:36678798:36680474:clu_35527:ENSG00000124762.13	Adipose_Subcutaneous	6:36648816:CS1	0.957512	0.0417826	0.0367773	0.192778	0.0416309	0.00181664	rs4135240
Abdominal Aortic Aneurysm	chr6:36678798:36680474:clu_36491:ENSG00000124762.13	Nerve_Tibial	6:36648816:CS1	0.957512	0.0417826	0.0450118	0.21792	0.0416309	0.00181664	rs4135240
Abdominal Aortic Aneurysm	chr6:36678798:36684097:clu_28508:ENSG00000124762.13	Fibroblasts	6:36648816:CS1	0.957512	0.0417826	-0.0324048	0.15062	0.0416309	0.00181664	rs4135240
Abdominal Aortic Aneurysm	chr6:36678798:36684097:clu_31015:ENSG00000124762.13	Heart_Atrial_Appendage	6:36648816:CS1	0.957512	0.0417826	-0.0492414	0.257803	0.0416309	0.00181664	rs4135240
Abdominal Aortic Aneurysm	chr6:36678798:36684097:clu_31413:ENSG00000124762.13	Artery_Aorta	6:36648816:CS1	0.957512	0.0417826	-0.0420233	0.230247	0.0416309	0.00181664	rs4135240
Abdominal Aortic Aneurysm	chr6:36678798:36684097:clu_32702:ENSG00000124762.13	Esophagus_Mucosa	6:36648816:CS1	0.957512	0.0417826	-0.0609158	0.343636	0.0416309	0.00181664	rs4135240
Abdominal Aortic Aneurysm	chr6:36678798:36684097:clu_32758:ENSG00000124762.13	Artery_Tibial	6:36648816:CS1	0.957512	0.0417826	-0.0496901	0.177181	0.0416309	0.00181664	rs4135240
Abdominal Aortic Aneurysm	chr6:36678798:36684097:clu_34556:ENSG00000124762.13	Adipose_Visceral	6:36648816:CS1	0.957512	0.0417826	-0.0361127	0.179117	0.0416309	0.00181664	rs4135240
Abdominal Aortic Aneurysm	chr6:36678798:36684097:clu_35527:ENSG00000124762.13	Adipose_Subcutaneous	6:36648816:CS1	0.957512	0.0417826	-0.0542161	0.233062	0.0416309	0.00181664	rs4135240
Abdominal Aortic Aneurysm	chr6:36678798:36684097:clu_36491:ENSG00000124762.13	Nerve_Tibial	6:36648816:CS1	0.957512	0.0417826	-0.0383773	0.165038	0.0416309	0.00181664	rs4135240
Abdominal Aortic Aneurysm	chr6:36678798:36684097:clu_37523:ENSG00000124762.13	Lung	6:36648816:CS1	0.957512	0.0417826	-0.0402061	0.193381	0.0416309	0.00181664	rs4135240
Abdominal Aortic Aneurysm	chr6:36678798:36684097:clu_38040:ENSG00000124762.13	Thyroid	6:36648816:CS1	0.957512	0.0417826	-0.0409126	0.188774	0.0416309	0.00181664	rs4135240
Abdominal Aortic Aneurysm	chr6:36678939:36680474:clu_28508:ENSG00000124762.13	Fibroblasts	6:36648816:CS1	0.957512	0.0417826	0.0312352	0.16069	0.0416309	0.00181664	rs4135240
Abdominal Aortic Aneurysm	chr6:36678939:36684097:clu_28508:ENSG00000124762.13	Fibroblasts	6:36648816:CS1	0.957512	0.0417826	0.0552237	0.286312	0.0416309	0.00181664	rs4135240
Abdominal Aortic Aneurysm	chr6:36678939:36684097:clu_32702:ENSG00000124762.13	Esophagus_Mucosa	6:36648816:CS1	0.957512	0.0417826	0.137717	0.632641	0.0416309	0.00181664	rs4135240
Abdominal Aortic Aneurysm	chr6:36678939:36684097:clu_34556:ENSG00000124762.13	Adipose_Visceral	6:36648816:CS1	0.957512	0.0417826	0.254025	1.40711	0.0416309	0.00181664	rs4135240
Abdominal Aortic Aneurysm	chr6:36678939:36684097:clu_36491:ENSG00000124762.13	Nerve_Tibial	6:36648816:CS1	0.957512	0.0417826	0.144097	0.809786	0.0416309	0.00181664	rs4135240
Abdominal Aortic Aneurysm	chr6:36678939:36684097:clu_37523:ENSG00000124762.13	Lung	6:36648816:CS1	0.957512	0.0417826	0.155216	0.616441	0.0416309	0.00181664	rs4135240
Abdominal Aortic Aneurysm	RPL10A	Adipose_Subcutaneous	6:36648816:CS2	0.977848	0.027972	0.0404609	0.1455	0.0327765	0.000857687	rs77612799~rs112754019
Abdominal Aortic Aneurysm	RPL10A	Artery_Aorta	6:36648816:CS2	0.977848	0.027972	0.0775328	0.239174	0.089614	0.0025782	rs77612799
Abdominal Aortic Aneurysm	RPL10A	Brain_Cerebellum	6:36648816:CS2	0.977848	0.027972	0.085744	0.328316	0.089614	0.0025782	rs77612799
Abdominal Aortic Aneurysm	RPL10A	Colon_Sigmoid	6:36648816:CS2	0.977848	0.027972	0.100824	0.315481	0.089614	0.0025782	rs77612799
Abdominal Aortic Aneurysm	RPL10A	Brain_Cortex	6:36648816:CS2	0.977848	0.027972	0.118788	0.39324	0.089614	0.0025782	rs77612799
Abdominal Aortic Aneurysm	RPL10A	Esophagus_Muscularis	6:36648816:CS2	0.977848	0.027972	0.18337	0.584646	0.089614	0.0025782	rs77612799
Abdominal Aortic Aneurysm	RPL10A	Heart_Atrial_Appendage	6:36648816:CS2	0.977848	0.027972	0.0909793	0.306263	0.089614	0.0025782	rs77612799
Abdominal Aortic Aneurysm	RPL10A	Heart_Left_Ventricle	6:36648816:CS2	0.977848	0.027972	0.0917384	0.301562	0.089614	0.0025782	rs77612799
Abdominal Aortic Aneurysm	RPL10A	Pituitary	6:36648816:CS2	0.977848	0.027972	0.249908	0.805565	0.089614	0.0025782	rs77612799
Abdominal Aortic Aneurysm	RPL10A	Thyroid	6:36648816:CS2	0.977848	0.027972	0.0493308	0.213483	0.0489321	0.00133232	rs77612799~rs112754019
Abdominal Aortic Aneurysm	chr6:35259727:35281056:clu_35465:ENSG00000065029.14	Adipose_Subcutaneous	6:36648816:CS2	0.977848	0.027972	-0.224503	0.761452	0.089614	0.0025782	rs77612799
Abdominal Aortic Aneurysm	chr6:35259841:35281056:clu_35465:ENSG00000065029.14	Adipose_Subcutaneous	6:36648816:CS2	0.977848	0.027972	0.157813	0.52601	0.089614	0.0025782	rs77612799
Abdominal Aortic Aneurysm	VEGFA	Islets	6:43806609:CS1	0.999718	0.0586628	-2.25868	2.30397	0.499859	0.0293314	rs881858
Abdominal Aortic Aneurysm	chr6:44233006:44233417:clu_34396:ENSG00000112759.16	Colon_Transverse	6:43806609:CS1	0.999718	0.0586628	2.37589	2.43596	0.499859	0.0293314	rs881858
Abdominal Aortic Aneurysm	VEGFA	Esophagus_Muscularis	6:43806609:CS2	0.953567	0.0306216	0.312021	0.714273	0.185654	0.00598814	rs735286
Abdominal Aortic Aneurysm	VEGFA	Fibroblasts	6:43806609:CS2	0.953567	0.0306216	0.184143	0.406201	0.185654	0.00598814	rs735286
Abdominal Aortic Aneurysm	VEGFA	Pancreas	6:43806609:CS2	0.953567	0.0306216	0.308345	0.657877	0.185654	0.00598814	rs735286
Abdominal Aortic Aneurysm	chr6:43778918:43780732:clu_31661:ENSG00000112715.21	Muscle_Skeletal	6:43806609:CS2	0.953567	0.0306216	0.63632	1.36531	0.185654	0.00598814	rs735286
Abdominal Aortic Aneurysm	chr6:43778918:43780732:clu_38388:ENSG00000112715.21	Thyroid	6:43806609:CS2	0.953567	0.0306216	0.133879	0.261092	0.185654	0.00598814	rs735286
Abdominal Aortic Aneurysm	chr6:43782087:43784541:clu_38388:ENSG00000112715.21	Thyroid	6:43806609:CS2	0.953567	0.0306216	-0.0184514	0.111157	0.025298	0.000680856	rs699946~rs735286
Abdominal Aortic Aneurysm	COL21A1	Artery_Tibial	6:56102126:CS1	0.96859	0.125166	0.0271154	0.126885	0.0337899	0.00456327	rs12209464~rs5876494
Abdominal Aortic Aneurysm	COL21A1	Esophagus_Muscularis	6:56102126:CS1	0.96859	0.125166	0.268037	0.794361	0.103867	0.0134003	rs12209464
Abdominal Aortic Aneurysm	chr6:56064622:56067295:clu_31849:ENSG00000124749.16	Artery_Aorta	6:56102126:CS1	0.96859	0.125166	0.130353	0.39283	0.103867	0.0134003	rs12209464
Abdominal Aortic Aneurysm	chr6:56064622:56067295:clu_37009:ENSG00000124749.16	Nerve_Tibial	6:56102126:CS1	0.96859	0.125166	0.0953363	0.293928	0.103867	0.0134003	rs12209464
Abdominal Aortic Aneurysm	chr6:56067330:56069046:clu_31849:ENSG00000124749.16	Artery_Aorta	6:56102126:CS1	0.96859	0.125166	-0.178493	0.575899	0.103867	0.0134003	rs12209464
Abdominal Aortic Aneurysm	chr6:56067330:56069046:clu_37009:ENSG00000124749.16	Nerve_Tibial	6:56102126:CS1	0.96859	0.125166	-0.0941306	0.260535	0.103867	0.0134003	rs12209464
Abdominal Aortic Aneurysm	chr6:56067330:56069046:clu_38568:ENSG00000124749.16	Thyroid	6:56102126:CS1	0.96859	0.125166	-0.280712	0.843713	0.103867	0.0134003	rs12209464
Abdominal Aortic Aneurysm	chr6:56077573:56091497:clu_31850:ENSG00000124749.16	Artery_Aorta	6:56102126:CS1	0.96859	0.125166	-0.075704	0.212601	0.103867	0.0134003	rs12209464
Abdominal Aortic Aneurysm	chr6:56077573:56101472:clu_31850:ENSG00000124749.16	Artery_Aorta	6:56102126:CS1	0.96859	0.125166	0.0948945	0.297255	0.103867	0.0134003	rs12209464
Abdominal Aortic Aneurysm	chr6:56090913:56091497:clu_31850:ENSG00000124749.16	Artery_Aorta	6:56102126:CS1	0.96859	0.125166	-0.12973	0.42433	0.103867	0.0134003	rs12209464
Abdominal Aortic Aneurysm	ENSG00000270661	Artery_Aorta	6:112398675:CS1	0.983765	0.163642	0.158619	1.00369	0.0258886	0.00430636	rs147163233
Abdominal Aortic Aneurysm	FAM229B	Adipose_Subcutaneous	6:112398675:CS1	0.983765	0.163642	0.0308968	0.0983764	0.0258886	0.00430636	rs147163233
Abdominal Aortic Aneurysm	FAM229B	Adipose_Visceral	6:112398675:CS1	0.983765	0.163642	0.036365	0.265773	0.0258886	0.00430636	rs147163233
Abdominal Aortic Aneurysm	FAM229B	Adrenal_Gland	6:112398675:CS1	0.983765	0.163642	0.033077	0.196679	0.0258886	0.00430636	rs147163233
Abdominal Aortic Aneurysm	FAM229B	Artery_Aorta	6:112398675:CS1	0.983765	0.163642	0.028034	0.154114	0.0258886	0.00430636	rs147163233
Abdominal Aortic Aneurysm	FAM229B	Artery_Coronary	6:112398675:CS1	0.983765	0.163642	0.0697899	0.4083	0.0258886	0.00430636	rs147163233
Abdominal Aortic Aneurysm	FAM229B	Artery_Tibial	6:112398675:CS1	0.983765	0.163642	0.0232961	0.13007	0.0258886	0.00430636	rs147163233
Abdominal Aortic Aneurysm	FAM229B	Colon_Sigmoid	6:112398675:CS1	0.983765	0.163642	0.0328454	0.199275	0.0258886	0.00430636	rs147163233
Abdominal Aortic Aneurysm	FAM229B	Colon_Transverse	6:112398675:CS1	0.983765	0.163642	0.0426622	0.226302	0.0258886	0.00430636	rs147163233
Abdominal Aortic Aneurysm	FAM229B	Esophagus_Junction	6:112398675:CS1	0.983765	0.163642	0.0307128	0.187456	0.0258886	0.00430636	rs147163233
Abdominal Aortic Aneurysm	FAM229B	Esophagus_Mucosa	6:112398675:CS1	0.983765	0.163642	0.0277445	0.16672	0.0258886	0.00430636	rs147163233
Abdominal Aortic Aneurysm	FAM229B	Esophagus_Muscularis	6:112398675:CS1	0.983765	0.163642	0.0262359	0.18233	0.0258886	0.00430636	rs147163233
Abdominal Aortic Aneurysm	FAM229B	Fibroblasts	6:112398675:CS1	0.983765	0.163642	0.0237835	0.135498	0.0258886	0.00430636	rs147163233
Abdominal Aortic Aneurysm	FAM229B	Lung	6:112398675:CS1	0.983765	0.163642	0.0484636	0.284277	0.0258886	0.00430636	rs147163233
Abdominal Aortic Aneurysm	FAM229B	Muscle_Skeletal	6:112398675:CS1	0.983765	0.163642	0.0288195	0.198422	0.0258886	0.00430636	rs147163233
Abdominal Aortic Aneurysm	FAM229B	Nerve_Tibial	6:112398675:CS1	0.983765	0.163642	0.0244654	0.169944	0.0258886	0.00430636	rs147163233
Abdominal Aortic Aneurysm	FAM229B	Pituitary	6:112398675:CS1	0.983765	0.163642	0.0359476	0.259369	0.0258886	0.00430636	rs147163233
Abdominal Aortic Aneurysm	FAM229B	Thyroid	6:112398675:CS1	0.983765	0.163642	0.0223688	0.101283	0.0258886	0.00430636	rs147163233
Abdominal Aortic Aneurysm	FAM229B	Whole_Blood	6:112398675:CS1	0.983765	0.163642	0.167029	0.991238	0.0258886	0.00430636	rs147163233
Abdominal Aortic Aneurysm	FYN	Adipose_Subcutaneous	6:112398675:CS1	0.983765	0.163642	0.0456824	0.278154	0.0258886	0.00430636	rs147163233
Abdominal Aortic Aneurysm	FYN	Artery_Tibial	6:112398675:CS1	0.983765	0.163642	0.0340973	0.207001	0.0258886	0.00430636	rs147163233
Abdominal Aortic Aneurysm	TUBE1	Adrenal_Gland	6:112398675:CS1	0.983765	0.163642	0.036043	0.200061	0.0258886	0.00430636	rs147163233
Abdominal Aortic Aneurysm	TUBE1	Lung	6:112398675:CS1	0.983765	0.163642	-0.0749976	0.397883	0.0258886	0.00430636	rs147163233
Abdominal Aortic Aneurysm	chr6:111720062:111740981:clu_29292:ENSG00000010810.17	Whole_Blood	6:112398675:CS1	0.983765	0.163642	0.189315	1.2711	0.0258886	0.00430636	rs147163233
Abdominal Aortic Aneurysm	chr6:112144933:112146685:clu_28675:ENSG00000112769.18	Heart_Left_Ventricle	6:112398675:CS1	0.983765	0.163642	0.0336091	0.232611	0.0258886	0.00430636	rs147163233
Abdominal Aortic Aneurysm	chr6:112144933:112146685:clu_31803:ENSG00000112769.18	Esophagus_Junction	6:112398675:CS1	0.983765	0.163642	0.030367	0.191072	0.0258886	0.00430636	rs147163233
Abdominal Aortic Aneurysm	chr6:112144933:112146685:clu_32562:ENSG00000112769.18	Colon_Sigmoid	6:112398675:CS1	0.983765	0.163642	0.0290783	0.18072	0.0258886	0.00430636	rs147163233
Abdominal Aortic Aneurysm	chr6:112144933:112146685:clu_33584:ENSG00000112769.18	Esophagus_Muscularis	6:112398675:CS1	0.983765	0.163642	0.0249396	0.17423	0.0258886	0.00430636	rs147163233
Abdominal Aortic Aneurysm	chr6:112144933:112146685:clu_35630:ENSG00000112769.18	Adipose_Visceral	6:112398675:CS1	0.983765	0.163642	0.0273625	0.12827	0.0258886	0.00430636	rs147163233
Abdominal Aortic Aneurysm	chr6:112144933:112146685:clu_37674:ENSG00000112769.18	Nerve_Tibial	6:112398675:CS1	0.983765	0.163642	0.0223884	0.162066	0.0258886	0.00430636	rs147163233
Abdominal Aortic Aneurysm	chr6:112144933:112148157:clu_28675:ENSG00000112769.18	Heart_Left_Ventricle	6:112398675:CS1	0.983765	0.163642	-0.03606	0.251085	0.0258886	0.00430636	rs147163233
Abdominal Aortic Aneurysm	chr6:112144933:112148157:clu_29785:ENSG00000112769.18	Artery_Coronary	6:112398675:CS1	0.983765	0.163642	-0.161053	1.21018	0.0258886	0.00430636	rs147163233
Abdominal Aortic Aneurysm	chr6:112144933:112148157:clu_31803:ENSG00000112769.18	Esophagus_Junction	6:112398675:CS1	0.983765	0.163642	-0.0316437	0.196982	0.0258886	0.00430636	rs147163233
Abdominal Aortic Aneurysm	chr6:112144933:112148157:clu_32032:ENSG00000112769.18	Heart_Atrial_Appendage	6:112398675:CS1	0.983765	0.163642	-0.0379185	0.231128	0.0258886	0.00430636	rs147163233
Abdominal Aortic Aneurysm	chr6:112144933:112148157:clu_32562:ENSG00000112769.18	Colon_Sigmoid	6:112398675:CS1	0.983765	0.163642	-0.0304975	0.176798	0.0258886	0.00430636	rs147163233
Abdominal Aortic Aneurysm	chr6:112144933:112148157:clu_33584:ENSG00000112769.18	Esophagus_Muscularis	6:112398675:CS1	0.983765	0.163642	-0.0257305	0.142726	0.0258886	0.00430636	rs147163233
Abdominal Aortic Aneurysm	chr6:112144933:112148157:clu_35630:ENSG00000112769.18	Adipose_Visceral	6:112398675:CS1	0.983765	0.163642	-0.0272687	0.19963	0.0258886	0.00430636	rs147163233
Abdominal Aortic Aneurysm	chr6:112144933:112148157:clu_37674:ENSG00000112769.18	Nerve_Tibial	6:112398675:CS1	0.983765	0.163642	-0.0223767	0.155904	0.0258886	0.00430636	rs147163233
Abdominal Aortic Aneurysm	CITED2	Muscle_Skeletal	6:140527046:CS1	0.995685	0.170344	7.29074	1.52112	0.995685	0.170344	rs72975824
Abdominal Aortic Aneurysm	chr6:160034522:160040560:clu_35783:ENSG00000197081.12	Colon_Transverse	6:161010118:CS1	1.00012	0.215347	4.69789	6.64289	0.333372	0.0717822	rs55730499
Abdominal Aortic Aneurysm	chr6:160442837:160443630:clu_38427:ENSG00000146477.5	Nerve_Tibial	6:161010118:CS1	1.00012	0.215347	1.50154	2.14698	0.333372	0.0717822	rs55730499
Abdominal Aortic Aneurysm	chr6:160442869:160443630:clu_38427:ENSG00000146477.5	Nerve_Tibial	6:161010118:CS1	1.00012	0.215347	-1.46786	2.07953	0.333372	0.0717822	rs55730499
Abdominal Aortic Aneurysm	ENSG00000233225	Muscle_Skeletal	7:40831296:CS1	0.995093	0.362105	14.9161	1.66699	0.995093	0.362105	rs10231545
Abdominal Aortic Aneurysm	LINC01449	Artery_Aorta	7:40831296:CS2	0.952293	0.138926	-0.21312	0.451205	0.190459	0.0277852	rs11531504
Abdominal Aortic Aneurysm	LINC01449	Artery_Coronary	7:40831296:CS2	0.952293	0.138926	-1.86938	3.91771	0.190459	0.0277852	rs11531504
Abdominal Aortic Aneurysm	LINC01449	Artery_Tibial	7:40831296:CS2	0.952293	0.138926	-0.402129	0.818869	0.190459	0.0277852	rs11531504
Abdominal Aortic Aneurysm	SUGCT	Artery_Aorta	7:40831296:CS2	0.952293	0.138926	-0.159104	0.338522	0.190459	0.0277852	rs11531504
Abdominal Aortic Aneurysm	YAE1	Artery_Tibial	7:40831296:CS2	0.952293	0.138926	0.617406	1.26325	0.190459	0.0277852	rs11531504
Abdominal Aortic Aneurysm	CDK13	Nerve_Tibial	7:40831296:CS4	0.976339	0.0895541	3.8784	3.36777	0.587333	0.0569059	rs6978474
Abdominal Aortic Aneurysm	chr7:39791367:39791594:clu_29505:ENSG00000188185.11	Esophagus_Muscularis	7:40831296:CS4	0.976339	0.0895541	0.518117	0.753413	0.33573	0.0277525	rs6953897~rs6978474
Abdominal Aortic Aneurysm	ENSG00000244055	Adipose_Subcutaneous	7:92248076:CS1	0.963042	0.150317	-0.0922475	0.649894	0.0183931	0.00233766	rs42044
Abdominal Aortic Aneurysm	chr7:92086416:92089385:clu_32986:ENSG00000127914.16	Adipose_Subcutaneous	7:92248076:CS1	0.963042	0.150317	5.94784	1.60567	0.944649	0.14798	rs42032
Abdominal Aortic Aneurysm	LPL	Adipose_Subcutaneous	8:19820405:CS1	0.995395	0.0684533	-0.485058	0.699169	0.331798	0.0228178	rs326
Abdominal Aortic Aneurysm	LPL	Nerve_Tibial	8:19820405:CS1	0.995395	0.0684533	-0.394363	0.582138	0.331798	0.0228178	rs326
Abdominal Aortic Aneurysm	chr8:19956083:19960901:clu_63521:ENSG00000175445.14	Lung	8:19820405:CS1	0.995395	0.0684533	1.22482	1.75135	0.331798	0.0228178	rs326
Abdominal Aortic Aneurysm	KCTD9	Adrenal_Gland	8:25314571:CS1	0.998378	0.0908586	-0.199325	0.666448	0.0767983	0.00698912	rs57677726
Abdominal Aortic Aneurysm	KCTD9	Esophagus_Mucosa	8:25314571:CS1	0.998378	0.0908586	-0.0805831	0.260237	0.0767983	0.00698912	rs57677726
Abdominal Aortic Aneurysm	chr8:25368725:25369556:clu_56773:ENSG00000147459.17	Pituitary	8:25314571:CS1	0.998378	0.0908586	0.2363	0.757171	0.0767983	0.00698912	rs57677726
Abdominal Aortic Aneurysm	chr8:25390287:25390831:clu_47128:ENSG00000147459.17	Whole_Blood	8:25314571:CS1	0.998378	0.0908586	-0.0722059	0.273331	0.0767983	0.00698912	rs57677726
Abdominal Aortic Aneurysm	chr8:25390287:25391896:clu_47128:ENSG00000147459.17	Whole_Blood	8:25314571:CS1	0.998378	0.0908586	0.0735869	0.252598	0.0767983	0.00698912	rs57677726
Abdominal Aortic Aneurysm	chr8:25390287:25391896:clu_61760:ENSG00000147459.17	Nerve_Tibial	8:25314571:CS1	0.998378	0.0908586	0.0976734	0.366719	0.0767983	0.00698912	rs57677726
Abdominal Aortic Aneurysm	chr8:25390951:25391896:clu_47128:ENSG00000147459.17	Whole_Blood	8:25314571:CS1	0.998378	0.0908586	-0.199332	0.653088	0.0767983	0.00698912	rs57677726
Abdominal Aortic Aneurysm	chr8:25410202:25411194:clu_57130:ENSG00000147459.17	Colon_Transverse	8:25314571:CS1	0.998378	0.0908586	0.595459	2.04451	0.0767983	0.00698912	rs57677726
Abdominal Aortic Aneurysm	chr8:25410202:25411194:clu_63699:ENSG00000147459.17	Lung	8:25314571:CS1	0.998378	0.0908586	0.085457	0.299904	0.0767983	0.00698912	rs57677726
Abdominal Aortic Aneurysm	chr8:25439792:25440577:clu_53165:ENSG00000104756.15	Muscle_Skeletal	8:25314571:CS1	0.998378	0.0908586	0.227984	0.8903	0.0767983	0.00698912	rs57677726
Abdominal Aortic Aneurysm	chr8:25446250:25450380:clu_59993:ENSG00000104756.15	Adipose_Subcutaneous	8:25314571:CS1	0.998378	0.0908586	0.103433	0.34849	0.0767983	0.00698912	rs57677726
Abdominal Aortic Aneurysm	chr8:25446250:25457301:clu_52859:ENSG00000104756.15	Artery_Aorta	8:25314571:CS1	0.998378	0.0908586	0.256652	0.880464	0.0767983	0.00698912	rs57677726
Abdominal Aortic Aneurysm	chr8:25446250:25458199:clu_59993:ENSG00000104756.15	Adipose_Subcutaneous	8:25314571:CS1	0.998378	0.0908586	-0.146918	0.540476	0.0767983	0.00698912	rs57677726
Abdominal Aortic Aneurysm	CHRNA2	Brain_Cerebellum	8:27416122:CS1	0.99802	0.0673426	-0.817398	0.132897	0.99802	0.0673426	rs2565064~rs58855963~rs11780471
Abdominal Aortic Aneurysm	chr9:111363298:111363588:clu_51359:ENSG00000136813.14	Artery_Aorta	9:113596728:CS1	0.999859	0.0594803	6.72318	1.15482	0.999859	0.0594803	rs4323539
Abdominal Aortic Aneurysm	DAB2IP	Adipose_Subcutaneous	9:124422403:CS1	1	0.232776	-1.62413	2.85547	0.25	0.0581941	rs10818578
Abdominal Aortic Aneurysm	DAB2IP	Adipose_Visceral	9:124422403:CS1	1	0.232776	-1.11775	1.86255	0.25	0.0581941	rs10818578
Abdominal Aortic Aneurysm	chr9:121651899:121678678:clu_53279:ENSG00000136848.16	Esophagus_Muscularis	9:124422403:CS1	1	0.232776	-1.78195	3.17796	0.25	0.0581941	rs10818578
Abdominal Aortic Aneurysm	chr9:121651899:121678678:clu_54109:ENSG00000136848.16	Artery_Tibial	9:124422403:CS1	1	0.232776	-2.33328	4.0093	0.25	0.0581941	rs10818578
Abdominal Aortic Aneurysm	TRAF1	Brain_Cerebellum	9:124422403:CS2	0.964315	0.0534256	0.043344	0.229277	0.0341307	0.00188504	rs3761849
Abdominal Aortic Aneurysm	TRAF1	Brain_Cortex	9:124422403:CS2	0.964315	0.0534256	0.0500876	0.301139	0.0341307	0.00188504	rs3761849
Abdominal Aortic Aneurysm	TRAF1	Heart_Left_Ventricle	9:124422403:CS2	0.964315	0.0534256	0.0846997	0.413355	0.0341307	0.00188504	rs3761849
Abdominal Aortic Aneurysm	TRAF1	Liver	9:124422403:CS2	0.964315	0.0534256	0.226932	0.941528	0.0341307	0.00188504	rs3761849
Abdominal Aortic Aneurysm	TRAF1	Muscle_Skeletal	9:124422403:CS2	0.964315	0.0534256	0.0268013	0.112569	0.0427866	0.00252948	rs7038991~rs3761849~rs41309874
Abdominal Aortic Aneurysm	chr9:120914300:120923705:clu_45894:ENSG00000056558.10	Whole_Blood	9:124422403:CS2	0.964315	0.0534256	0.0602026	0.339648	0.0341307	0.00188504	rs3761849
Abdominal Aortic Aneurysm	chr9:120914300:120923705:clu_51503:ENSG00000056558.10	Artery_Aorta	9:124422403:CS2	0.964315	0.0534256	0.0402466	0.225529	0.0341307	0.00188504	rs3761849
Abdominal Aortic Aneurysm	chr9:120914300:120923705:clu_54064:ENSG00000056558.10	Artery_Tibial	9:124422403:CS2	0.964315	0.0534256	0.0418382	0.270014	0.0341307	0.00188504	rs3761849
Abdominal Aortic Aneurysm	chr9:120914300:120923705:clu_56933:ENSG00000056558.10	Adipose_Visceral	9:124422403:CS2	0.964315	0.0534256	0.0420399	0.248546	0.0341307	0.00188504	rs3761849
Abdominal Aortic Aneurysm	chr9:120914300:120923705:clu_58495:ENSG00000056558.10	Adipose_Subcutaneous	9:124422403:CS2	0.964315	0.0534256	0.0839808	0.45341	0.0341307	0.00188504	rs3761849
Abdominal Aortic Aneurysm	chr9:120914300:120923705:clu_60198:ENSG00000056558.10	Nerve_Tibial	9:124422403:CS2	0.964315	0.0534256	0.0360598	0.189643	0.0341307	0.00188504	rs3761849
Abdominal Aortic Aneurysm	chr9:120914300:120923705:clu_62573:ENSG00000056558.10	Thyroid	9:124422403:CS2	0.964315	0.0534256	0.0470634	0.235255	0.0341307	0.00188504	rs3761849
Abdominal Aortic Aneurysm	chr9:120922691:120923705:clu_51503:ENSG00000056558.10	Artery_Aorta	9:124422403:CS2	0.964315	0.0534256	-0.0457726	0.321172	0.0341307	0.00188504	rs3761849
Abdominal Aortic Aneurysm	chr9:120922691:120923705:clu_54064:ENSG00000056558.10	Artery_Tibial	9:124422403:CS2	0.964315	0.0534256	-0.0506418	0.244681	0.0341307	0.00188504	rs3761849
Abdominal Aortic Aneurysm	chr9:120922691:120923705:clu_60198:ENSG00000056558.10	Nerve_Tibial	9:124422403:CS2	0.964315	0.0534256	-0.034153	0.203557	0.0341307	0.00188504	rs3761849
Abdominal Aortic Aneurysm	chr9:120922691:120923705:clu_62573:ENSG00000056558.10	Thyroid	9:124422403:CS2	0.964315	0.0534256	-0.0423874	0.153329	0.0341307	0.00188504	rs3761849
Abdominal Aortic Aneurysm	chr9:120923792:120925936:clu_45237:ENSG00000056558.10	Adrenal_Gland	9:124422403:CS2	0.964315	0.0534256	0.0681625	0.434416	0.0341307	0.00188504	rs3761849
Abdominal Aortic Aneurysm	chr9:120923792:120925936:clu_45895:ENSG00000056558.10	Whole_Blood	9:124422403:CS2	0.964315	0.0534256	0.0286728	0.183893	0.0341307	0.00188504	rs3761849
Abdominal Aortic Aneurysm	chr9:120923792:120925936:clu_47220:ENSG00000056558.10	Fibroblasts	9:124422403:CS2	0.964315	0.0534256	0.026521	0.127863	0.0341307	0.00188504	rs3761849
Abdominal Aortic Aneurysm	chr9:120923792:120925936:clu_50659:ENSG00000056558.10	Stomach	9:124422403:CS2	0.964315	0.0534256	0.136208	0.754667	0.0341307	0.00188504	rs3761849
Abdominal Aortic Aneurysm	chr9:120923792:120925936:clu_51353:ENSG00000056558.10	Colon_Sigmoid	9:124422403:CS2	0.964315	0.0534256	0.0340702	0.187038	0.0341307	0.00188504	rs3761849
Abdominal Aortic Aneurysm	chr9:120923792:120925936:clu_51504:ENSG00000056558.10	Artery_Aorta	9:124422403:CS2	0.964315	0.0534256	0.0270087	0.115736	0.0341307	0.00188504	rs3761849
Abdominal Aortic Aneurysm	chr9:120923792:120925936:clu_53239:ENSG00000056558.10	Esophagus_Muscularis	9:124422403:CS2	0.964315	0.0534256	0.0686472	0.401153	0.0341307	0.00188504	rs3761849
Abdominal Aortic Aneurysm	chr9:120923792:120925936:clu_55272:ENSG00000056558.10	Pituitary	9:124422403:CS2	0.964315	0.0534256	0.0380495	0.2154	0.0341307	0.00188504	rs3761849
Abdominal Aortic Aneurysm	chr9:120923792:120925936:clu_55678:ENSG00000056558.10	Colon_Transverse	9:124422403:CS2	0.964315	0.0534256	0.0335304	0.179184	0.0341307	0.00188504	rs3761849
Abdominal Aortic Aneurysm	chr9:120923792:120925936:clu_58496:ENSG00000056558.10	Adipose_Subcutaneous	9:124422403:CS2	0.964315	0.0534256	0.0280209	0.138194	0.0341307	0.00188504	rs3761849
Abdominal Aortic Aneurysm	chr9:120923792:120925936:clu_60199:ENSG00000056558.10	Nerve_Tibial	9:124422403:CS2	0.964315	0.0534256	0.0214554	0.104507	0.0341307	0.00188504	rs3761849
Abdominal Aortic Aneurysm	chr9:120923792:120925936:clu_62118:ENSG00000056558.10	Lung	9:124422403:CS2	0.964315	0.0534256	0.0257189	0.137054	0.0341307	0.00188504	rs3761849
Abdominal Aortic Aneurysm	JMJD1C	Fibroblasts	10:64406358:CS1	0.9947	0.102635	0.484259	1.32158	0.109213	0.0108608	rs10822145~rs149520237
Abdominal Aortic Aneurysm	JMJD1C	Lung	10:64406358:CS1	0.9947	0.102635	0.217179	0.617442	0.112139	0.0106504	rs10822145
Abdominal Aortic Aneurysm	JMJD1C-AS1	Fibroblasts	10:64406358:CS1	0.9947	0.102635	0.221771	0.555023	0.112139	0.0106504	rs10822145
Abdominal Aortic Aneurysm	MRPL35P2	Stomach	10:64406358:CS1	0.9947	0.102635	1.26756	1.19027	0.549069	0.0598231	rs10822145~rs149520237
Abdominal Aortic Aneurysm	NRBF2	Fibroblasts	10:64406358:CS1	0.9947	0.102635	-0.106299	0.300903	0.112139	0.0106504	rs10822145
Abdominal Aortic Aneurysm	chr10:63594854:63598024:clu_9479:ENSG00000165476.13	Colon_Sigmoid	10:64406358:CS2	0.989585	0.0885015	1.22774	1.27709	0.494793	0.0442507	rs34838577
Abdominal Aortic Aneurysm	chr10:63598144:63599170:clu_9479:ENSG00000165476.13	Colon_Sigmoid	10:64406358:CS2	0.989585	0.0885015	-0.961202	1.01593	0.494793	0.0442507	rs34838577
Abdominal Aortic Aneurysm	CAMK2G	Esophagus_Mucosa	10:75673101:CS1	0.958382	0.137269	0.0350073	0.202436	0.0350924	0.00498998	rs2664284
Abdominal Aortic Aneurysm	CAMK2G	Fibroblasts	10:75673101:CS1	0.958382	0.137269	0.0391166	0.219484	0.0406895	0.00586963	rs2664284~rs75314006
Abdominal Aortic Aneurysm	ENSG00000242338	Islets	10:75673101:CS1	0.958382	0.137269	-0.326971	1.55699	0.0350924	0.00498998	rs2664284
Abdominal Aortic Aneurysm	NDST2	Adipose_Subcutaneous	10:75673101:CS1	0.958382	0.137269	-0.0979232	0.539411	0.0350924	0.00498998	rs2664284
Abdominal Aortic Aneurysm	NDST2	Adipose_Visceral	10:75673101:CS1	0.958382	0.137269	-0.040178	0.222997	0.0350924	0.00498998	rs2664284
Abdominal Aortic Aneurysm	NDST2	Adrenal_Gland	10:75673101:CS1	0.958382	0.137269	-0.104005	0.554083	0.0350924	0.00498998	rs2664284
Abdominal Aortic Aneurysm	NDST2	Esophagus_Mucosa	10:75673101:CS1	0.958382	0.137269	-0.0415155	0.192665	0.0350924	0.00498998	rs2664284
Abdominal Aortic Aneurysm	NDST2	Lung	10:75673101:CS1	0.958382	0.137269	-0.0341644	0.206529	0.0350924	0.00498998	rs2664284
Abdominal Aortic Aneurysm	NDST2	Whole_Blood	10:75673101:CS1	0.958382	0.137269	-0.0320858	0.158607	0.0350924	0.00498998	rs2664284
Abdominal Aortic Aneurysm	SEC24C	Adipose_Subcutaneous	10:75673101:CS1	0.958382	0.137269	0.134848	0.750475	0.0350924	0.00498998	rs2664284
Abdominal Aortic Aneurysm	SEC24C	Fibroblasts	10:75673101:CS1	0.958382	0.137269	0.0644099	0.361735	0.0350924	0.00498998	rs2664284
Abdominal Aortic Aneurysm	chr10:73728587:73730318:clu_9761:ENSG00000242338.6	Artery_Aorta	10:75673101:CS1	0.958382	0.137269	0.0957023	0.512704	0.0350924	0.00498998	rs2664284
Abdominal Aortic Aneurysm	chr10:73765589:73766350:clu_9182:ENSG00000176986.15	Brain_Cerebellum	10:75673101:CS1	0.958382	0.137269	0.0389392	0.214239	0.0350924	0.00498998	rs2664284
Abdominal Aortic Aneurysm	chr10:73766853:73767837:clu_11647:ENSG00000176986.15	Thyroid	10:75673101:CS1	0.958382	0.137269	-0.146531	0.749853	0.0350924	0.00498998	rs2664284
Abdominal Aortic Aneurysm	chr10:73837511:73839539:clu_10051:ENSG00000148660.20	Esophagus_Muscularis	10:75673101:CS1	0.958382	0.137269	0.0349739	0.133708	0.0350924	0.00498998	rs2664284
Abdominal Aortic Aneurysm	chr10:73837511:73839539:clu_10227:ENSG00000148660.20	Artery_Tibial	10:75673101:CS1	0.958382	0.137269	0.0425562	0.268938	0.0350924	0.00498998	rs2664284
Abdominal Aortic Aneurysm	chr10:73837511:73839539:clu_9461:ENSG00000148660.20	Esophagus_Junction	10:75673101:CS1	0.958382	0.137269	0.0819816	0.492342	0.0350924	0.00498998	rs2664284
Abdominal Aortic Aneurysm	chr10:73837511:73842169:clu_10051:ENSG00000148660.20	Esophagus_Muscularis	10:75673101:CS1	0.958382	0.137269	-0.0311148	0.133193	0.0350924	0.00498998	rs2664284
Abdominal Aortic Aneurysm	chr10:73837511:73842169:clu_10227:ENSG00000148660.20	Artery_Tibial	10:75673101:CS1	0.958382	0.137269	-0.0468642	0.197745	0.055061	0.00823477	rs2664284~rs17630952
Abdominal Aortic Aneurysm	chr10:73837511:73842169:clu_9461:ENSG00000148660.20	Esophagus_Junction	10:75673101:CS1	0.958382	0.137269	-0.0519464	0.224242	0.0350924	0.00498998	rs2664284
Abdominal Aortic Aneurysm	chr10:73837511:73842169:clu_9731:ENSG00000148660.20	Colon_Sigmoid	10:75673101:CS1	0.958382	0.137269	-0.0566657	0.284496	0.0350924	0.00498998	rs2664284
Abdominal Aortic Aneurysm	chr10:73839601:73842169:clu_10051:ENSG00000148660.20	Esophagus_Muscularis	10:75673101:CS1	0.958382	0.137269	0.0618791	0.291193	0.0350924	0.00498998	rs2664284
Abdominal Aortic Aneurysm	chr10:73839601:73842169:clu_10227:ENSG00000148660.20	Artery_Tibial	10:75673101:CS1	0.958382	0.137269	0.0517191	0.177857	0.0555052	0.00839513	rs2664284~rs17630952
Abdominal Aortic Aneurysm	chr10:73839601:73842169:clu_9731:ENSG00000148660.20	Colon_Sigmoid	10:75673101:CS1	0.958382	0.137269	0.0854804	0.454533	0.0350924	0.00498998	rs2664284
Abdominal Aortic Aneurysm	chr10:73913381:73913539:clu_10232:ENSG00000122861.15	Artery_Tibial	10:75673101:CS1	0.958382	0.137269	-0.0467739	0.285197	0.0350924	0.00498998	rs2664284
Abdominal Aortic Aneurysm	chr10:73913381:73913539:clu_11094:ENSG00000122861.15	Adipose_Subcutaneous	10:75673101:CS1	0.958382	0.137269	-0.0438931	0.28839	0.0350924	0.00498998	rs2664284
Abdominal Aortic Aneurysm	LIPA	Adrenal_Gland	10:91002927:CS1	0.961586	0.202829	0.0134129	0.125128	0.00808867	0.00145529	rs1412444
Abdominal Aortic Aneurysm	LIPA	Artery_Aorta	10:91002927:CS1	0.961586	0.202829	0.0609249	0.625781	0.00808867	0.00145529	rs1412444
Abdominal Aortic Aneurysm	LIPA	Colon_Transverse	10:91002927:CS1	0.961586	0.202829	0.0120523	0.135164	0.00808867	0.00145529	rs1412444
Abdominal Aortic Aneurysm	LIPA	Lung	10:91002927:CS1	0.961586	0.202829	0.00886515	0.0767052	0.00808867	0.00145529	rs1412444
Abdominal Aortic Aneurysm	LIPA	Pancreas	10:91002927:CS1	0.961586	0.202829	0.0130555	0	0.00808867	0.00145529	rs1412444
Abdominal Aortic Aneurysm	LIPA	Spleen	10:91002927:CS1	0.961586	0.202829	1.53547	0.673871	0.848344	0.182455	rs1320496~rs1412444
Abdominal Aortic Aneurysm	LIPA	Stomach	10:91002927:CS1	0.961586	0.202829	0.0176923	0.276101	0.00808867	0.00145529	rs1412444
Abdominal Aortic Aneurysm	LIPA	Whole_Blood	10:91002927:CS1	0.961586	0.202829	0.00653969	0.102782	0.00808867	0.00145529	rs1412444
Abdominal Aortic Aneurysm	chr10:89247649:89251707:clu_10913:ENSG00000107798.17	Adipose_Visceral	10:91002927:CS1	0.961586	0.202829	0.00954402	0.106949	0.00808867	0.00145529	rs1412444
Abdominal Aortic Aneurysm	chr10:89247649:89251707:clu_11307:ENSG00000107798.17	Adipose_Subcutaneous	10:91002927:CS1	0.961586	0.202829	0.00750108	0.0876783	0.00808867	0.00145529	rs1412444
Abdominal Aortic Aneurysm	chr10:89247649:89251707:clu_11855:ENSG00000107798.17	Lung	10:91002927:CS1	0.961586	0.202829	0.00903262	0.133892	0.00808867	0.00145529	rs1412444
Abdominal Aortic Aneurysm	chr10:89247649:89251707:clu_9189:ENSG00000107798.17	Fibroblasts	10:91002927:CS1	0.961586	0.202829	0.00767245	0.0675657	0.00808867	0.00145529	rs1412444
Abdominal Aortic Aneurysm	chr10:89247649:89251707:clu_9978:ENSG00000107798.17	Artery_Aorta	10:91002927:CS1	0.961586	0.202829	0.0129022	0.103307	0.00808867	0.00145529	rs1412444
Abdominal Aortic Aneurysm	chr10:89247649:89251737:clu_10913:ENSG00000107798.17	Adipose_Visceral	10:91002927:CS1	0.961586	0.202829	-0.00938819	0.142761	0.00808867	0.00145529	rs1412444
Abdominal Aortic Aneurysm	chr10:89247649:89251737:clu_11307:ENSG00000107798.17	Adipose_Subcutaneous	10:91002927:CS1	0.961586	0.202829	-0.00748901	0.10182	0.00808867	0.00145529	rs1412444
Abdominal Aortic Aneurysm	NOC3L	Adrenal_Gland	10:95898827:CS2	0.96945	0.13415	-0.158113	0.578301	0.0614077	0.00837221	rs17516758~rs11187850
Abdominal Aortic Aneurysm	NOC3L	Colon_Sigmoid	10:95898827:CS2	0.96945	0.13415	-0.332175	0.770691	0.16169	0.0224732	rs17516758~rs11187850
Abdominal Aortic Aneurysm	NOC3L	Colon_Transverse	10:95898827:CS2	0.96945	0.13415	-0.415727	0.889639	0.161527	0.0224513	rs17516758~rs11187850
Abdominal Aortic Aneurysm	NOC3L	Brain_Cortex	10:95898827:CS2	0.96945	0.13415	-0.472883	1.32374	0.0950483	0.0130701	rs17516758~rs11187850
Abdominal Aortic Aneurysm	NOC3L	Pancreas	10:95898827:CS2	0.96945	0.13415	-0.337371	0.81126	0.15776	0.0219207	rs17516758~rs11187850
Abdominal Aortic Aneurysm	NOC3L	Small_Intestine	10:95898827:CS2	0.96945	0.13415	-0.295614	0.942771	0.0777979	0.0106561	rs17516758~rs11187850
Abdominal Aortic Aneurysm	NOC3L	Stomach	10:95898827:CS2	0.96945	0.13415	-0.499916	1.17473	0.155735	0.0216349	rs17516758~rs11187850
Abdominal Aortic Aneurysm	TBC1D12	Thyroid	10:95898827:CS2	0.96945	0.13415	0.228912	0.764029	0.098484	0.0135711	rs17516758~rs11187850
Abdominal Aortic Aneurysm	chr10:92291529:92311135:clu_10725:ENSG00000198060.9	Colon_Transverse	10:95898827:CS3	0.995355	0.0341384	-9.64473	2.04876	0.995355	0.0341384	rs4418728
Abdominal Aortic Aneurysm	ENSG00000260461	Brain_Cerebellum	10:105640978:CS1	1	0.096633	0.204745	0.577871	0.118739	0.0112688	rs7100920
Abdominal Aortic Aneurysm	ENSG00000260461	Brain_Cortex	10:105640978:CS1	1	0.096633	0.463836	1.31187	0.118739	0.0112688	rs7100920
Abdominal Aortic Aneurysm	ENSG00000260461	Esophagus_Mucosa	10:105640978:CS1	1	0.096633	0.186871	0.505989	0.118739	0.0112688	rs7100920
Abdominal Aortic Aneurysm	SLK	Muscle_Skeletal	10:105640978:CS1	1	0.096633	-0.681125	1.95635	0.118739	0.0112688	rs7100920
Abdominal Aortic Aneurysm	STN1	Fibroblasts	10:105640978:CS1	1	0.096633	0.314298	0.487188	0.287567	0.0290204	rs11191835~rs7100920
Abdominal Aortic Aneurysm	STN1	Whole_Blood	10:105640978:CS1	1	0.096633	0.14898	0.41367	0.118739	0.0112688	rs7100920
Abdominal Aortic Aneurysm	chr10:103439868:103440376:clu_11424:ENSG00000148843.13	Adipose_Visceral	10:105640978:CS1	1	0.096633	-0.843263	2.3933	0.118739	0.0112688	rs7100920
Abdominal Aortic Aneurysm	chr11:27640005:27659171:clu_5512:ENSG00000245573.7	Heart_Left_Ventricle	11:27646246:CS1	0.984346	0.0705773	-0.043857	0.186519	0.0479498	0.0034212	rs6265
Abdominal Aortic Aneurysm	chr11:27640005:27659171:clu_5823:ENSG00000245573.7	Artery_Coronary	11:27646246:CS1	0.984346	0.0705773	-0.0350685	0.158217	0.0479498	0.0034212	rs6265
Abdominal Aortic Aneurysm	chr11:27640005:27659171:clu_5899:ENSG00000245573.7	Brain_Cerebellum	11:27646246:CS1	0.984346	0.0705773	-0.0341716	0.168576	0.0479498	0.0034212	rs6265
Abdominal Aortic Aneurysm	chr11:27640005:27659171:clu_5951:ENSG00000245573.7	Fibroblasts	11:27646246:CS1	0.984346	0.0705773	-0.0253559	0.158282	0.0479498	0.0034212	rs6265
Abdominal Aortic Aneurysm	chr11:27640005:27659171:clu_6127:ENSG00000245573.7	Esophagus_Junction	11:27646246:CS1	0.984346	0.0705773	-0.0351069	0.144366	0.0479498	0.0034212	rs6265
Abdominal Aortic Aneurysm	chr11:27640005:27659171:clu_6206:ENSG00000245573.7	Stomach	11:27646246:CS1	0.984346	0.0705773	-0.0402117	0.154952	0.0479498	0.0034212	rs6265
Abdominal Aortic Aneurysm	chr11:27640005:27659171:clu_6246:ENSG00000245573.7	Heart_Atrial_Appendage	11:27646246:CS1	0.984346	0.0705773	-0.0951877	0.455561	0.0479498	0.0034212	rs6265
Abdominal Aortic Aneurysm	chr11:27640005:27659171:clu_6268:ENSG00000245573.7	Colon_Sigmoid	11:27646246:CS1	0.984346	0.0705773	-0.242841	1.37184	0.0479498	0.0034212	rs6265
Abdominal Aortic Aneurysm	chr11:27640005:27659171:clu_6428:ENSG00000245573.7	Artery_Aorta	11:27646246:CS1	0.984346	0.0705773	-0.0288343	0.144912	0.0479498	0.0034212	rs6265
Abdominal Aortic Aneurysm	chr11:27640005:27659171:clu_6559:ENSG00000245573.7	Esophagus_Muscularis	11:27646246:CS1	0.984346	0.0705773	-0.0252297	0.11544	0.0479498	0.0034212	rs6265
Abdominal Aortic Aneurysm	chr11:27640005:27659171:clu_6772:ENSG00000245573.7	Artery_Tibial	11:27646246:CS1	0.984346	0.0705773	-0.0249144	0.152316	0.0479498	0.0034212	rs6265
Abdominal Aortic Aneurysm	chr11:27640005:27659171:clu_6812:ENSG00000245573.7	Colon_Transverse	11:27646246:CS1	0.984346	0.0705773	-0.03773	0.137872	0.0479498	0.0034212	rs6265
Abdominal Aortic Aneurysm	chr11:27640005:27659171:clu_7009:ENSG00000245573.7	Adipose_Visceral	11:27646246:CS1	0.984346	0.0705773	-0.0251419	0.136986	0.0479498	0.0034212	rs6265
Abdominal Aortic Aneurysm	chr11:27640005:27659171:clu_7284:ENSG00000245573.7	Adipose_Subcutaneous	11:27646246:CS1	0.984346	0.0705773	-0.0252347	0.126321	0.0479498	0.0034212	rs6265
Abdominal Aortic Aneurysm	chr11:27640005:27659171:clu_7502:ENSG00000245573.7	Nerve_Tibial	11:27646246:CS1	0.984346	0.0705773	-0.0192229	0.0801115	0.0479498	0.0034212	rs6265
Abdominal Aortic Aneurysm	chr11:27640005:27659171:clu_7592:ENSG00000245573.7	Lung	11:27646246:CS1	0.984346	0.0705773	-0.0245669	0.10933	0.0479498	0.0034212	rs6265
Abdominal Aortic Aneurysm	chr11:27640005:27659171:clu_7628:ENSG00000245573.7	Thyroid	11:27646246:CS1	0.984346	0.0705773	-0.0193306	0.0872843	0.0479498	0.0034212	rs6265
Abdominal Aortic Aneurysm	chr11:27658462:27659171:clu_5951:ENSG00000245573.7	Fibroblasts	11:27646246:CS1	0.984346	0.0705773	0.048032	0.205773	0.0479498	0.0034212	rs6265
Abdominal Aortic Aneurysm	chr11:27658462:27659171:clu_7502:ENSG00000245573.7	Nerve_Tibial	11:27646246:CS1	0.984346	0.0705773	0.0792026	0.294062	0.0479498	0.0034212	rs6265
Abdominal Aortic Aneurysm	chr11:27658462:27659171:clu_7628:ENSG00000245573.7	Thyroid	11:27646246:CS1	0.984346	0.0705773	0.0743929	0.253639	0.0732994	0.00557455	rs1387144~rs6265
Abdominal Aortic Aneurysm	ATG13	Stomach	11:46379442:CS1	0.98225	0.117681	-0.235712	0.657184	0.109139	0.0130756	rs11038871
Abdominal Aortic Aneurysm	MDK	Fibroblasts	11:46379442:CS1	0.98225	0.117681	-0.302255	0.873803	0.109139	0.0130756	rs11038871
Abdominal Aortic Aneurysm	chr11:46361706:46366244:clu_6467:ENSG00000149091.15	Muscle_Skeletal	11:46379442:CS1	0.98225	0.117681	-0.158802	0.413799	0.109139	0.0130756	rs11038871
Abdominal Aortic Aneurysm	chr11:46362651:46367291:clu_6467:ENSG00000149091.15	Muscle_Skeletal	11:46379442:CS1	0.98225	0.117681	0.200507	0.576136	0.109139	0.0130756	rs11038871
Abdominal Aortic Aneurysm	chr11:46369550:46371313:clu_5652:ENSG00000149091.15	Brain_Cortex	11:46379442:CS1	0.98225	0.117681	-0.689455	2.01072	0.109139	0.0130756	rs11038871
Abdominal Aortic Aneurysm	chr11:46369550:46371313:clu_6940:ENSG00000149091.15	Artery_Tibial	11:46379442:CS1	0.98225	0.117681	-0.315713	0.943543	0.109139	0.0130756	rs11038871
Abdominal Aortic Aneurysm	chr11:46369550:46371313:clu_7456:ENSG00000149091.15	Adipose_Subcutaneous	11:46379442:CS1	0.98225	0.117681	-0.178071	0.544205	0.109139	0.0130756	rs11038871
Abdominal Aortic Aneurysm	chr11:46696156:46697021:clu_6630:ENSG00000175220.11	Artery_Aorta	11:46379442:CS1	0.98225	0.117681	0.606225	1.77698	0.109139	0.0130756	rs11038871
Abdominal Aortic Aneurysm	chr11:47270246:47273827:clu_5764:ENSG00000110514.19	Whole_Blood	11:46379442:CS1	0.98225	0.117681	0.267715	0.802071	0.109139	0.0130756	rs11038871
Abdominal Aortic Aneurysm	FOLH1B	Liver	11:89224718:CS1	0.997085	0.119637	-3.23613	1.82165	0.80033	0.0943901	rs7939071~rs2289123
Abdominal Aortic Aneurysm	chr11:102081281:102083071:clu_7439:ENSG00000137691.12	Fibroblasts	11:102795606:CS1	1	0.143537	5.28878	0.666412	1	0.143537	rs1892971
Abdominal Aortic Aneurysm	MMP1	Artery_Tibial	11:102795606:CS2	0.998765	0.0760517	-1.19619	2.11608	0.249691	0.0190129	rs1144397
Abdominal Aortic Aneurysm	MMP12	Lung	11:102795606:CS2	0.998765	0.0760517	1.33723	2.52435	0.249691	0.0190129	rs1144397
Abdominal Aortic Aneurysm	chr11:103358359:103399663:clu_7925:ENSG00000187240.13	Stomach	11:102795606:CS2	0.998765	0.0760517	-1.08129	1.96898	0.249691	0.0190129	rs1144397
Abdominal Aortic Aneurysm	chr11:103399872:103435943:clu_7925:ENSG00000187240.13	Stomach	11:102795606:CS2	0.998765	0.0760517	1.23359	2.18022	0.249691	0.0190129	rs1144397
Abdominal Aortic Aneurysm	RDX	Whole_Blood	11:110229530:CS1	0.999842	0.234123	-0.901141	0.6241	0.68389	0.159932	rs11213364~rs1486903
Abdominal Aortic Aneurysm	ADAMTS8	Adipose_Visceral	11:130280667:CS1	1	0.20809	0.936657	0.939713	0.5	0.104045	rs6590455
Abdominal Aortic Aneurysm	ADAMTS8	Artery_Aorta	11:130280667:CS1	1	0.20809	1.90777	1.92349	0.5	0.104045	rs6590455
Abdominal Aortic Aneurysm	ENSG00000255910	Artery_Aorta	12:19932378:CS1	0.993814	0.182562	0.402394	0.494048	0.41283	0.073352	rs7968529~rs2417809
Abdominal Aortic Aneurysm	ENSG00000256499	Artery_Aorta	12:19932378:CS1	0.993814	0.182562	0.699991	0.604428	0.580984	0.10921	rs7968529~rs2417809
Abdominal Aortic Aneurysm	LINC02398	Artery_Coronary	12:19932378:CS2	0.999491	0.135335	2.64178	0.494216	0.999491	0.135335	rs56241718
Abdominal Aortic Aneurysm	ENSG00000268069	Artery_Aorta	12:48179478:CS1	0.97481	0.0499312	0.152895	0.851032	0.0341588	0.00173814	rs1006477
Abdominal Aortic Aneurysm	ENSG00000276691	Adipose_Visceral	12:48179478:CS1	0.97481	0.0499312	0.026493	0.117625	0.0341588	0.00173814	rs1006477
Abdominal Aortic Aneurysm	ENSG00000276691	Adrenal_Gland	12:48179478:CS1	0.97481	0.0499312	0.0365231	0.166228	0.0341588	0.00173814	rs1006477
Abdominal Aortic Aneurysm	ENSG00000276691	Artery_Aorta	12:48179478:CS1	0.97481	0.0499312	0.0288609	0.172716	0.0341588	0.00173814	rs1006477
Abdominal Aortic Aneurysm	ENSG00000276691	Artery_Coronary	12:48179478:CS1	0.97481	0.0499312	0.05022	0.256652	0.0341588	0.00173814	rs1006477
Abdominal Aortic Aneurysm	ENSG00000276691	Brain_Cerebellum	12:48179478:CS1	0.97481	0.0499312	0.0424775	0.231605	0.0341588	0.00173814	rs1006477
Abdominal Aortic Aneurysm	ENSG00000276691	Colon_Sigmoid	12:48179478:CS1	0.97481	0.0499312	0.0525061	0.323351	0.0341588	0.00173814	rs1006477
Abdominal Aortic Aneurysm	ENSG00000276691	Colon_Transverse	12:48179478:CS1	0.97481	0.0499312	0.0321535	0.155776	0.0341588	0.00173814	rs1006477
Abdominal Aortic Aneurysm	ENSG00000276691	Brain_Cortex	12:48179478:CS1	0.97481	0.0499312	0.044062	0.255088	0.0341588	0.00173814	rs1006477
Abdominal Aortic Aneurysm	ENSG00000276691	Esophagus_Junction	12:48179478:CS1	0.97481	0.0499312	0.0312241	0.182501	0.0341588	0.00173814	rs1006477
Abdominal Aortic Aneurysm	ENSG00000276691	Esophagus_Mucosa	12:48179478:CS1	0.97481	0.0499312	0.0245274	0.154157	0.0341588	0.00173814	rs1006477
Abdominal Aortic Aneurysm	ENSG00000276691	Esophagus_Muscularis	12:48179478:CS1	0.97481	0.0499312	0.0280963	0.147005	0.0341588	0.00173814	rs1006477
Abdominal Aortic Aneurysm	ENSG00000276691	Heart_Atrial_Appendage	12:48179478:CS1	0.97481	0.0499312	0.0350868	0.185297	0.0341588	0.00173814	rs1006477
Abdominal Aortic Aneurysm	ENSG00000276691	Heart_Left_Ventricle	12:48179478:CS1	0.97481	0.0499312	0.0435118	0.21681	0.0341588	0.00173814	rs1006477
Abdominal Aortic Aneurysm	ENSG00000276691	Liver	12:48179478:CS1	0.97481	0.0499312	0.170272	0.961782	0.0341588	0.00173814	rs1006477
Abdominal Aortic Aneurysm	ENSG00000276691	Nerve_Tibial	12:48179478:CS1	0.97481	0.0499312	0.0209803	0.130475	0.0341588	0.00173814	rs1006477
Abdominal Aortic Aneurysm	ENSG00000276691	Pancreas	12:48179478:CS1	0.97481	0.0499312	0.037084	0.187678	0.0341588	0.00173814	rs1006477
Abdominal Aortic Aneurysm	ENSG00000276691	Pituitary	12:48179478:CS1	0.97481	0.0499312	0.0287882	0.180343	0.0286978	0.00148584	rs1006477~rs146990935
Abdominal Aortic Aneurysm	ENSG00000276691	Small_Intestine	12:48179478:CS1	0.97481	0.0499312	0.129016	0.736155	0.0341588	0.00173814	rs1006477
Abdominal Aortic Aneurysm	ENSG00000276691	Spleen	12:48179478:CS1	0.97481	0.0499312	0.0319876	0.148668	0.0341588	0.00173814	rs1006477
Abdominal Aortic Aneurysm	ENSG00000276691	Stomach	12:48179478:CS1	0.97481	0.0499312	0.0384473	0.210822	0.0387457	0.00199252	rs1006477~rs141415801
Abdominal Aortic Aneurysm	ENSG00000276691	Thyroid	12:48179478:CS1	0.97481	0.0499312	0.0208432	0.11331	0.0341588	0.00173814	rs1006477
Abdominal Aortic Aneurysm	ENSG00000276691	Whole_Blood	12:48179478:CS1	0.97481	0.0499312	0.0219942	0.113551	0.0341588	0.00173814	rs1006477
Abdominal Aortic Aneurysm	chr12:47784217:47785387:clu_2860:ENSG00000061273.17	Pancreas	12:48179478:CS1	0.97481	0.0499312	-0.22628	1.11354	0.0341588	0.00173814	rs1006477
Abdominal Aortic Aneurysm	chr12:47784217:47785387:clu_3091:ENSG00000061273.17	Heart_Left_Ventricle	12:48179478:CS1	0.97481	0.0499312	-0.0274303	0.123286	0.0341588	0.00173814	rs1006477
Abdominal Aortic Aneurysm	chr12:47784217:47785387:clu_3763:ENSG00000061273.17	Pituitary	12:48179478:CS1	0.97481	0.0499312	-0.0483864	0.193196	0.0533979	0.00299925	rs56130536~rs1006477
Abdominal Aortic Aneurysm	chr12:47784217:47785387:clu_4275:ENSG00000061273.17	Nerve_Tibial	12:48179478:CS1	0.97481	0.0499312	-0.0237052	0.127724	0.0341588	0.00173814	rs1006477
Abdominal Aortic Aneurysm	chr12:48660619:48662560:clu_3097:ENSG00000139620.12	Whole_Blood	12:48179478:CS1	0.97481	0.0499312	0.168908	0.968936	0.0341588	0.00173814	rs1006477
Abdominal Aortic Aneurysm	LRP1	Artery_Tibial	12:57527283:CS1	0.982984	0.17786	0.796754	0.823222	0.491492	0.08893	rs11172113
Abdominal Aortic Aneurysm	chr12:57110110:57111129:clu_4069:ENSG00000166888.11	Muscle_Skeletal	12:57527283:CS1	0.982984	0.17786	1.97897	2.04436	0.491492	0.08893	rs11172113
Abdominal Aortic Aneurysm	USP15	Artery_Aorta	12:62628188:CS1	0.967174	0.179395	0.433967	0.290934	0.701881	0.132754	rs56117810
Abdominal Aortic Aneurysm	chr12:62374535:62381490:clu_5063:ENSG00000135655.15	Thyroid	12:62628188:CS1	0.967174	0.179395	1.94013	3.17269	0.265293	0.0466408	rs111354240
Abdominal Aortic Aneurysm	FGF9	Artery_Aorta	13:22871446:CS1	1	0.406539	-4.78808	4.8419	0.5	0.203269	rs7994761
Abdominal Aortic Aneurysm	FGF9	Artery_Tibial	13:22871446:CS1	1	0.406539	-1.98566	1.99311	0.5	0.203269	rs7994761
Abdominal Aortic Aneurysm	COL4A1	Fibroblasts	13:111060819:CS1	0.965106	0.0393997	0.255198	0.285186	0.464593	0.0190039	rs1927342
Abdominal Aortic Aneurysm	COL4A2	Fibroblasts	13:111060819:CS1	0.965106	0.0393997	0.281737	0.31915	0.464593	0.0190039	rs1927342
Abdominal Aortic Aneurysm	ENSG00000235280	Adipose_Subcutaneous	13:113637010:CS1	0.994736	0.0445142	0.237484	0.561662	0.142105	0.00635918	rs2993344
Abdominal Aortic Aneurysm	ENSG00000235280	Brain_Cerebellum	13:113637010:CS1	0.994736	0.0445142	0.119954	0.298922	0.142105	0.00635918	rs2993344
Abdominal Aortic Aneurysm	ENSG00000235280	Brain_Cortex	13:113637010:CS1	0.994736	0.0445142	0.137612	0.326444	0.142105	0.00635918	rs2993344
Abdominal Aortic Aneurysm	ENSG00000235280	Lung	13:113637010:CS1	0.994736	0.0445142	0.413984	1.11174	0.142105	0.00635918	rs2993344
Abdominal Aortic Aneurysm	ENSG00000235280	Pituitary	13:113637010:CS1	0.994736	0.0445142	0.195014	0.498846	0.142105	0.00635918	rs2993344
Abdominal Aortic Aneurysm	ENSG00000267868	Brain_Cortex	13:113637010:CS1	0.994736	0.0445142	0.180204	0.474379	0.142105	0.00635918	rs2993344
Abdominal Aortic Aneurysm	chr13:113584888:113585774:clu_3149:ENSG00000198176.12	Lung	13:113637010:CS1	0.994736	0.0445142	-0.405197	0.988327	0.142105	0.00635918	rs2993344
Abdominal Aortic Aneurysm	EIF2B2	Adrenal_Gland	14:75537381:CS1	0.953456	0.0876257	-0.0679976	0.539002	0.0136216	0.00125197	rs11546525
Abdominal Aortic Aneurysm	EIF2B2	Colon_Sigmoid	14:75537381:CS1	0.953456	0.0876257	-0.0238833	0.195443	0.0136216	0.00125197	rs11546525
Abdominal Aortic Aneurysm	EIF2B2	Colon_Transverse	14:75537381:CS1	0.953456	0.0876257	-0.0480553	0.486687	0.0136216	0.00125197	rs11546525
Abdominal Aortic Aneurysm	EIF2B2	Kidney_Glom	14:75537381:CS1	0.953456	0.0876257	-0.0208738	0.165576	0.0136216	0.00125197	rs11546525
Abdominal Aortic Aneurysm	EIF2B2	Lymphocytes	14:75537381:CS1	0.953456	0.0876257	-0.137133	0.890179	0.0136216	0.00125197	rs11546525
Abdominal Aortic Aneurysm	ENSG00000258646	Thyroid	14:75537381:CS1	0.953456	0.0876257	0.0809439	0.586826	0.0136216	0.00125197	rs11546525
Abdominal Aortic Aneurysm	ENSG00000259138	Adipose_Subcutaneous	14:75537381:CS1	0.953456	0.0876257	-0.018232	0.169891	0.0136216	0.00125197	rs11546525
Abdominal Aortic Aneurysm	ENSG00000259138	Artery_Tibial	14:75537381:CS1	0.953456	0.0876257	-0.0469233	0.431554	0.0136216	0.00125197	rs11546525
Abdominal Aortic Aneurysm	ENSG00000259138	Lung	14:75537381:CS1	0.953456	0.0876257	-0.0548512	0.545059	0.0136216	0.00125197	rs11546525
Abdominal Aortic Aneurysm	ENSG00000259138	Nerve_Tibial	14:75537381:CS1	0.953456	0.0876257	-0.0188825	0.173582	0.0136216	0.00125197	rs11546525
Abdominal Aortic Aneurysm	ENSG00000259138	Thyroid	14:75537381:CS1	0.953456	0.0876257	-0.0345171	0.176717	0.0136216	0.00125197	rs11546525
Abdominal Aortic Aneurysm	ENSG00000279594	Adipose_Subcutaneous	14:75537381:CS1	0.953456	0.0876257	-0.0346562	0.26066	0.0136216	0.00125197	rs11546525
Abdominal Aortic Aneurysm	ENSG00000279594	Artery_Tibial	14:75537381:CS1	0.953456	0.0876257	-0.0357062	0.386523	0.0136216	0.00125197	rs11546525
Abdominal Aortic Aneurysm	ENSG00000279594	Colon_Sigmoid	14:75537381:CS1	0.953456	0.0876257	-0.106104	0.868852	0.0136216	0.00125197	rs11546525
Abdominal Aortic Aneurysm	ENSG00000279594	Muscle_Skeletal	14:75537381:CS1	0.953456	0.0876257	-0.0199073	0.130161	0.0136216	0.00125197	rs11546525
Abdominal Aortic Aneurysm	MLH3	Fibroblasts	14:75537381:CS1	0.953456	0.0876257	-0.0187257	0.159688	0.0136216	0.00125197	rs11546525
Abdominal Aortic Aneurysm	MLH3	Kidney_Tube	14:75537381:CS1	0.953456	0.0876257	-0.0304374	0.355257	0.0136216	0.00125197	rs11546525
Abdominal Aortic Aneurysm	MLH3	Nerve_Tibial	14:75537381:CS1	0.953456	0.0876257	0.0267681	0.264191	0.0136216	0.00125197	rs11546525
Abdominal Aortic Aneurysm	NEK9	Artery_Aorta	14:75537381:CS1	0.953456	0.0876257	0.0180957	0.105354	0.0136216	0.00125197	rs11546525
Abdominal Aortic Aneurysm	NEK9	Fibroblasts	14:75537381:CS1	0.953456	0.0876257	0.0178889	0.146476	0.0136216	0.00125197	rs11546525
Abdominal Aortic Aneurysm	NEK9	Heart_Atrial_Appendage	14:75537381:CS1	0.953456	0.0876257	-0.0777654	0.649534	0.0136216	0.00125197	rs11546525
Abdominal Aortic Aneurysm	ZC2HC1C	Brain_Cortex	14:75537381:CS1	0.953456	0.0876257	-0.0468633	0.505813	0.0136216	0.00125197	rs11546525
Abdominal Aortic Aneurysm	chr14:75032179:75038340:clu_23052:ENSG00000119684.15	Nerve_Tibial	14:75537381:CS1	0.953456	0.0876257	0.0302611	0.223238	0.0136216	0.00125197	rs11546525
Abdominal Aortic Aneurysm	chr14:75032179:75038340:clu_23824:ENSG00000119684.15	Thyroid	14:75537381:CS1	0.953456	0.0876257	0.0279713	0.254634	0.0136216	0.00125197	rs11546525
Abdominal Aortic Aneurysm	chr14:75038412:75039911:clu_18044:ENSG00000119684.15	Fibroblasts	14:75537381:CS1	0.953456	0.0876257	0.0376908	0.334644	0.0136216	0.00125197	rs11546525
Abdominal Aortic Aneurysm	chr14:75038412:75039911:clu_19384:ENSG00000119684.15	Esophagus_Junction	14:75537381:CS1	0.953456	0.0876257	0.111665	0.68355	0.0136216	0.00125197	rs11546525
Abdominal Aortic Aneurysm	chr14:75038412:75039911:clu_19856:ENSG00000119684.15	Muscle_Skeletal	14:75537381:CS1	0.953456	0.0876257	0.0242069	0.253847	0.0136216	0.00125197	rs11546525
Abdominal Aortic Aneurysm	chr14:75038412:75039911:clu_19892:ENSG00000119684.15	Colon_Sigmoid	14:75537381:CS1	0.953456	0.0876257	0.0333368	0.269309	0.0136216	0.00125197	rs11546525
Abdominal Aortic Aneurysm	chr14:75038412:75039911:clu_20499:ENSG00000119684.15	Esophagus_Muscularis	14:75537381:CS1	0.953456	0.0876257	0.0353966	0.312694	0.0136216	0.00125197	rs11546525
Abdominal Aortic Aneurysm	chr14:75038412:75039911:clu_20752:ENSG00000119684.15	Artery_Tibial	14:75537381:CS1	0.953456	0.0876257	0.04947	0.273274	0.0136216	0.00125197	rs11546525
Abdominal Aortic Aneurysm	chr14:75038412:75039911:clu_21762:ENSG00000119684.15	Adipose_Visceral	14:75537381:CS1	0.953456	0.0876257	0.0376175	0.242597	0.0136216	0.00125197	rs11546525
Abdominal Aortic Aneurysm	chr14:75038412:75039911:clu_22455:ENSG00000119684.15	Adipose_Subcutaneous	14:75537381:CS1	0.953456	0.0876257	0.02179	0.180682	0.0136216	0.00125197	rs11546525
Abdominal Aortic Aneurysm	chr14:75038412:75039911:clu_23825:ENSG00000119684.15	Thyroid	14:75537381:CS1	0.953456	0.0876257	0.0284625	0.268752	0.0136216	0.00125197	rs11546525
Abdominal Aortic Aneurysm	chr14:75038412:75041615:clu_17086:ENSG00000119684.15	Pancreas	14:75537381:CS1	0.953456	0.0876257	-0.0266679	0.217349	0.0136216	0.00125197	rs11546525
Abdominal Aortic Aneurysm	chr14:75038412:75041615:clu_18044:ENSG00000119684.15	Fibroblasts	14:75537381:CS1	0.953456	0.0876257	-0.015504	0.152199	0.013562	0.00123958	rs8014403~rs11546525
Abdominal Aortic Aneurysm	chr14:75038412:75041615:clu_19532:ENSG00000119684.15	Stomach	14:75537381:CS1	0.953456	0.0876257	-0.0269616	0.289781	0.0136216	0.00125197	rs11546525
Abdominal Aortic Aneurysm	chr14:75038412:75041615:clu_19564:ENSG00000119684.15	Heart_Atrial_Appendage	14:75537381:CS1	0.953456	0.0876257	-0.0305088	0.22837	0.0136216	0.00125197	rs11546525
Abdominal Aortic Aneurysm	chr14:75038412:75041615:clu_19892:ENSG00000119684.15	Colon_Sigmoid	14:75537381:CS1	0.953456	0.0876257	-0.0170129	0.174241	0.0136216	0.00125197	rs11546525
Abdominal Aortic Aneurysm	chr14:75038412:75041615:clu_19898:ENSG00000119684.15	Artery_Aorta	14:75537381:CS1	0.953456	0.0876257	-0.103843	0.633454	0.0136216	0.00125197	rs11546525
Abdominal Aortic Aneurysm	chr14:75038412:75041615:clu_20752:ENSG00000119684.15	Artery_Tibial	14:75537381:CS1	0.953456	0.0876257	-0.0158219	0.127867	0.0136216	0.00125197	rs11546525
Abdominal Aortic Aneurysm	chr14:75038412:75041615:clu_21176:ENSG00000119684.15	Pituitary	14:75537381:CS1	0.953456	0.0876257	-0.027244	0.120441	0.0136216	0.00125197	rs11546525
Abdominal Aortic Aneurysm	chr14:75038412:75041615:clu_21451:ENSG00000119684.15	Colon_Transverse	14:75537381:CS1	0.953456	0.0876257	-0.0185731	0.140722	0.0136216	0.00125197	rs11546525
Abdominal Aortic Aneurysm	chr14:75038412:75041615:clu_23651:ENSG00000119684.15	Lung	14:75537381:CS1	0.953456	0.0876257	-0.0154708	0.146837	0.0136216	0.00125197	rs11546525
Abdominal Aortic Aneurysm	chr14:75040015:75041615:clu_19384:ENSG00000119684.15	Esophagus_Junction	14:75537381:CS1	0.953456	0.0876257	0.106487	0.824109	0.0136216	0.00125197	rs11546525
Abdominal Aortic Aneurysm	chr14:75040015:75041615:clu_19892:ENSG00000119684.15	Colon_Sigmoid	14:75537381:CS1	0.953456	0.0876257	0.0265897	0.209436	0.0136216	0.00125197	rs11546525
Abdominal Aortic Aneurysm	chr14:75040015:75041615:clu_20499:ENSG00000119684.15	Esophagus_Muscularis	14:75537381:CS1	0.953456	0.0876257	0.0412162	0.337621	0.0136216	0.00125197	rs11546525
Abdominal Aortic Aneurysm	chr14:75040015:75041615:clu_23053:ENSG00000119684.15	Nerve_Tibial	14:75537381:CS1	0.953456	0.0876257	0.0219258	0.18093	0.0136216	0.00125197	rs11546525
Abdominal Aortic Aneurysm	chr14:75040015:75041615:clu_23651:ENSG00000119684.15	Lung	14:75537381:CS1	0.953456	0.0876257	0.0370771	0.357321	0.0136216	0.00125197	rs11546525
Abdominal Aortic Aneurysm	chr14:75042477:75046376:clu_22455:ENSG00000119684.15	Adipose_Subcutaneous	14:75537381:CS1	0.953456	0.0876257	-0.107127	1.07612	0.0136216	0.00125197	rs11546525
Abdominal Aortic Aneurysm	chr14:75053659:75056447:clu_23827:ENSG00000119640.8	Thyroid	14:75537381:CS1	0.953456	0.0876257	-0.122825	0.846396	0.0136216	0.00125197	rs11546525
Abdominal Aortic Aneurysm	chr14:75071396:75077532:clu_23829:ENSG00000119703.13	Thyroid	14:75537381:CS1	0.953456	0.0876257	0.0202309	0.191605	0.0136216	0.00125197	rs11546525
Abdominal Aortic Aneurysm	chr14:75071911:75077532:clu_19896:ENSG00000119703.13	Colon_Sigmoid	14:75537381:CS1	0.953456	0.0876257	-0.0720902	0.776356	0.0136216	0.00125197	rs11546525
Abdominal Aortic Aneurysm	chr14:75071911:75077532:clu_20503:ENSG00000119703.13	Esophagus_Muscularis	14:75537381:CS1	0.953456	0.0876257	-0.051142	0.493984	0.0136216	0.00125197	rs11546525
Abdominal Aortic Aneurysm	chr14:75071911:75077532:clu_23829:ENSG00000119703.13	Thyroid	14:75537381:CS1	0.953456	0.0876257	-0.0204693	0.17838	0.0136216	0.00125197	rs11546525
Abdominal Aortic Aneurysm	chr14:75120580:75121119:clu_21773:ENSG00000119638.12	Adipose_Visceral	14:75537381:CS1	0.953456	0.0876257	0.0588912	0	0.0136216	0.00125197	rs11546525
Abdominal Aortic Aneurysm	chr14:75121174:75126703:clu_20512:ENSG00000119638.12	Esophagus_Muscularis	14:75537381:CS1	0.953456	0.0876257	0.0269298	0.257486	0.0136216	0.00125197	rs11546525
Abdominal Aortic Aneurysm	chr14:75121174:75126703:clu_23064:ENSG00000119638.12	Nerve_Tibial	14:75537381:CS1	0.953456	0.0876257	0.0776135	0.706828	0.0136216	0.00125197	rs11546525
Abdominal Aortic Aneurysm	chr14:75121174:75126703:clu_23839:ENSG00000119638.12	Thyroid	14:75537381:CS1	0.953456	0.0876257	0.0210208	0.183398	0.0136216	0.00125197	rs11546525
Abdominal Aortic Aneurysm	chr14:75135006:75135663:clu_19909:ENSG00000170348.8	Artery_Aorta	14:75537381:CS1	0.953456	0.0876257	0.0698415	0.432595	0.0136216	0.00125197	rs11546525
Abdominal Aortic Aneurysm	chr14:75135006:75135760:clu_19909:ENSG00000170348.8	Artery_Aorta	14:75537381:CS1	0.953456	0.0876257	-0.078353	0.49982	0.0136216	0.00125197	rs11546525
Abdominal Aortic Aneurysm	chr14:75135886:75139074:clu_22469:ENSG00000170348.8	Adipose_Subcutaneous	14:75537381:CS1	0.953456	0.0876257	-0.0125654	0.104144	0.0136216	0.00125197	rs11546525
Abdominal Aortic Aneurysm	chr14:75135886:75147664:clu_17731:ENSG00000170348.8	Whole_Blood	14:75537381:CS1	0.953456	0.0876257	0.018444	0.135323	0.0136216	0.00125197	rs11546525
Abdominal Aortic Aneurysm	chr14:75135886:75147664:clu_19193:ENSG00000170348.8	Brain_Cerebellum	14:75537381:CS1	0.953456	0.0876257	0.104853	1.0098	0.0136216	0.00125197	rs11546525
Abdominal Aortic Aneurysm	chr14:75135886:75147664:clu_19546:ENSG00000170348.8	Stomach	14:75537381:CS1	0.953456	0.0876257	0.0232535	0.204306	0.0136216	0.00125197	rs11546525
Abdominal Aortic Aneurysm	chr14:75135886:75147664:clu_19908:ENSG00000170348.8	Colon_Sigmoid	14:75537381:CS1	0.953456	0.0876257	0.0189825	0.164097	0.0136216	0.00125197	rs11546525
Abdominal Aortic Aneurysm	chr14:75135886:75147664:clu_21190:ENSG00000170348.8	Pituitary	14:75537381:CS1	0.953456	0.0876257	0.02276	0.182716	0.0136216	0.00125197	rs11546525
Abdominal Aortic Aneurysm	chr14:75135886:75147664:clu_22469:ENSG00000170348.8	Adipose_Subcutaneous	14:75537381:CS1	0.953456	0.0876257	0.0122301	0.117541	0.0136216	0.00125197	rs11546525
Abdominal Aortic Aneurysm	chr14:75135886:75147664:clu_23066:ENSG00000170348.8	Nerve_Tibial	14:75537381:CS1	0.953456	0.0876257	0.0133862	0.104398	0.0136216	0.00125197	rs11546525
Abdominal Aortic Aneurysm	chr14:75135886:75147664:clu_23664:ENSG00000170348.8	Lung	14:75537381:CS1	0.953456	0.0876257	0.0151739	0.13919	0.0136216	0.00125197	rs11546525
Abdominal Aortic Aneurysm	chr14:75139171:75147664:clu_22469:ENSG00000170348.8	Adipose_Subcutaneous	14:75537381:CS1	0.953456	0.0876257	-0.0130433	0.144515	0.0136216	0.00125197	rs11546525
Abdominal Aortic Aneurysm	DLST	Heart_Left_Ventricle	14:75537381:CS2	0.972547	0.0171475	-0.312332	0.656064	0.194509	0.0034295	rs3742783
Abdominal Aortic Aneurysm	DLST	Muscle_Skeletal	14:75537381:CS2	0.972547	0.0171475	-0.107401	0.222449	0.194509	0.0034295	rs3742783
Abdominal Aortic Aneurysm	RPS6KL1	Kidney_Tube	14:75537381:CS2	0.972547	0.0171475	-0.219301	0.474224	0.194509	0.0034295	rs3742783
Abdominal Aortic Aneurysm	chr14:74911841:74919845:clu_19885:ENSG00000198208.11	Artery_Aorta	14:75537381:CS2	0.972547	0.0171475	-0.661309	1.35862	0.194509	0.0034295	rs3742783
Abdominal Aortic Aneurysm	chr14:74911841:74919845:clu_23811:ENSG00000198208.11	Thyroid	14:75537381:CS2	0.972547	0.0171475	-0.50904	1.01586	0.194509	0.0034295	rs3742783
Abdominal Aortic Aneurysm	HHIPL1	Adipose_Subcutaneous	14:100135306:CS1	0.951769	0.0543123	0.065599	0.153115	0.159424	0.00784152	rs4905875~rs1958320~rs150028613
Abdominal Aortic Aneurysm	HHIPL1	Adrenal_Gland	14:100135306:CS1	0.951769	0.0543123	0.102735	0.345068	0.0754944	0.00338261	rs4905875~rs9324011
Abdominal Aortic Aneurysm	HHIPL1	Esophagus_Junction	14:100135306:CS1	0.951769	0.0543123	0.0242235	0.186553	0.0206741	0.000754473	rs4905875~rs9324011
Abdominal Aortic Aneurysm	HHIPL1	Esophagus_Muscularis	14:100135306:CS1	0.951769	0.0543123	0.0909936	0.257547	0.135633	0.00677169	rs9324011~rs74784375
Abdominal Aortic Aneurysm	HHIPL1	Nerve_Tibial	14:100135306:CS1	0.951769	0.0543123	0.0281688	0.147092	0.040132	0.00168969	rs9324011
Abdominal Aortic Aneurysm	HHIPL1	Spleen	14:100135306:CS1	0.951769	0.0543123	0.0344567	0.211705	0.040132	0.00168969	rs9324011
Abdominal Aortic Aneurysm	RPL7AP62	Stomach	15:48729030:CS1	0.969707	0.0983814	0.176648	0.73569	0.0652291	0.00499585	rs61999107
Abdominal Aortic Aneurysm	MINDY2	Artery_Aorta	15:58988380:CS1	0.975808	0.0970991	0.646239	0.410455	0.731308	0.0740139	rs116696575~rs17301982
Abdominal Aortic Aneurysm	MINDY2	Artery_Tibial	15:58988380:CS1	0.975808	0.0970991	0.16901	0.31196	0.2445	0.0230851	rs17301982~rs16940850
Abdominal Aortic Aneurysm	RORA	Heart_Atrial_Appendage	15:61061218:CS1	0.999157	0.172479	1.36071	0.258933	0.999157	0.172479	rs9302215
Abdominal Aortic Aneurysm	chr15:67727945:67748231:clu_21572:ENSG00000137764.19	Thyroid	15:67628221:CS1	0.999988	0.0677981	2.94532	0.481185	0.999988	0.0677981	rs35874463
Abdominal Aortic Aneurysm	LOXL1	Artery_Tibial	15:74226145:CS1	0.999122	0.0776388	-1.22755	0.570143	0.846288	0.0666064	rs58270968~rs72745367
Abdominal Aortic Aneurysm	CYP1A1	Adipose_Subcutaneous	15:74226145:CS2	0.955171	0.0469167	-0.0649683	0.262696	0.0588649	0.00289914	rs2470890
Abdominal Aortic Aneurysm	CYP1A1	Adipose_Visceral	15:74226145:CS2	0.955171	0.0469167	-0.0779918	0.296295	0.0588649	0.00289914	rs2470890
Abdominal Aortic Aneurysm	CYP1A1	Artery_Tibial	15:74226145:CS2	0.955171	0.0469167	-0.0826362	0.349041	0.0588649	0.00289914	rs2470890
Abdominal Aortic Aneurysm	CYP1A1	Esophagus_Junction	15:74226145:CS2	0.955171	0.0469167	-0.209417	0.732646	0.0588649	0.00289914	rs2470890
Abdominal Aortic Aneurysm	CYP1A1	Esophagus_Mucosa	15:74226145:CS2	0.955171	0.0469167	-0.151137	0.653635	0.0588649	0.00289914	rs2470890
Abdominal Aortic Aneurysm	CYP1A1	Esophagus_Muscularis	15:74226145:CS2	0.955171	0.0469167	-0.0937952	0.398822	0.0588649	0.00289914	rs2470890
Abdominal Aortic Aneurysm	CYP1A1	Lung	15:74226145:CS2	0.955171	0.0469167	-0.0825609	0.333356	0.0588649	0.00289914	rs2470890
Abdominal Aortic Aneurysm	CYP1A1	Muscle_Skeletal	15:74226145:CS2	0.955171	0.0469167	-0.0501468	0.207381	0.0588649	0.00289914	rs2470890
Abdominal Aortic Aneurysm	CYP1A1	Nerve_Tibial	15:74226145:CS2	0.955171	0.0469167	-0.0686738	0.22583	0.0588649	0.00289914	rs2470890
Abdominal Aortic Aneurysm	CYP1A1	Thyroid	15:74226145:CS2	0.955171	0.0469167	-0.0695295	0.283546	0.0588649	0.00289914	rs2470890
Abdominal Aortic Aneurysm	EDC3	Adipose_Subcutaneous	15:74226145:CS2	0.955171	0.0469167	-0.18675	0.804488	0.0588649	0.00289914	rs2470890
Abdominal Aortic Aneurysm	FAM219B	Muscle_Skeletal	15:74226145:CS2	0.955171	0.0469167	-0.334582	1.51365	0.0588649	0.00289914	rs2470890
Abdominal Aortic Aneurysm	FAM219B	Thyroid	15:74226145:CS2	0.955171	0.0469167	0.230984	1.03731	0.0588649	0.00289914	rs2470890
Abdominal Aortic Aneurysm	MPI	Spleen	15:74226145:CS2	0.955171	0.0469167	0.127265	0.516105	0.0588649	0.00289914	rs2470890
Abdominal Aortic Aneurysm	chr15:74813029:74816157:clu_17823:ENSG00000140506.16	Heart_Atrial_Appendage	15:74226145:CS2	0.955171	0.0469167	-0.0164296	0.157052	0.0133334	0.000530419	rs2470890~rs12898397
Abdominal Aortic Aneurysm	chr15:74823682:74824351:clu_15863:ENSG00000140506.16	Heart_Left_Ventricle	15:74226145:CS2	0.955171	0.0469167	0.291906	1.07745	0.0588649	0.00289914	rs2470890
Abdominal Aortic Aneurysm	chr15:74824310:74825473:clu_16942:ENSG00000140506.16	Spleen	15:74226145:CS2	0.955171	0.0469167	0.123951	0.560465	0.0588649	0.00289914	rs2470890
Abdominal Aortic Aneurysm	PSMA4	Whole_Blood	15:78867482:CS1	0.985445	0.167265	2.54201	0.284102	0.985445	0.167265	rs28498264~rs58365910
Abdominal Aortic Aneurysm	CETP	Adipose_Subcutaneous	16:56989590:CS1	0.999993	0.0796608	0.128856	0.457068	0.0701826	0.00549356	rs247616
Abdominal Aortic Aneurysm	CETP	Artery_Aorta	16:56989590:CS1	0.999993	0.0796608	0.322985	1.27181	0.0701826	0.00549356	rs247616
Abdominal Aortic Aneurysm	CETP	Colon_Transverse	16:56989590:CS1	0.999993	0.0796608	0.172033	0.557093	0.0701826	0.00549356	rs247616
Abdominal Aortic Aneurysm	CETP	Heart_Atrial_Appendage	16:56989590:CS1	0.999993	0.0796608	0.145649	0.528333	0.0701826	0.00549356	rs247616
Abdominal Aortic Aneurysm	CETP	Kidney_Tube	16:56989590:CS1	0.999993	0.0796608	0.0861823	0.273276	0.0701826	0.00549356	rs247616
Abdominal Aortic Aneurysm	CETP	Lung	16:56989590:CS1	0.999993	0.0796608	0.101831	0.394203	0.0701826	0.00549356	rs247616
Abdominal Aortic Aneurysm	CETP	Muscle_Skeletal	16:56989590:CS1	0.999993	0.0796608	0.435226	1.60759	0.0701826	0.00549356	rs247616
Abdominal Aortic Aneurysm	CETP	Pancreas	16:56989590:CS1	0.999993	0.0796608	0.370587	1.41864	0.0701826	0.00549356	rs247616
Abdominal Aortic Aneurysm	CETP	Small_Intestine	16:56989590:CS1	0.999993	0.0796608	0.209933	0.712613	0.0701826	0.00549356	rs247616
Abdominal Aortic Aneurysm	CETP	Stomach	16:56989590:CS1	0.999993	0.0796608	0.883408	1.38081	0.298167	0.0247253	rs247616~rs1800775
Abdominal Aortic Aneurysm	CETP	Thyroid	16:56989590:CS1	0.999993	0.0796608	0.124955	0.511296	0.0701826	0.00549356	rs247616
Abdominal Aortic Aneurysm	ENSG00000261783	Adipose_Subcutaneous	16:75451461:CS1	0.950465	0.0963888	0.00690671	0.0803305	0.00900429	0.000828559	rs11149831
Abdominal Aortic Aneurysm	ENSG00000261783	Adipose_Visceral	16:75451461:CS1	0.950465	0.0963888	0.00685139	0.116054	0.00900429	0.000828559	rs11149831
Abdominal Aortic Aneurysm	ENSG00000261783	Adrenal_Gland	16:75451461:CS1	0.950465	0.0963888	0.0107517	0.122153	0.00900429	0.000828559	rs11149831
Abdominal Aortic Aneurysm	ENSG00000261783	Artery_Aorta	16:75451461:CS1	0.950465	0.0963888	0.00960136	0	0.00900429	0.000828559	rs11149831
Abdominal Aortic Aneurysm	ENSG00000261783	Artery_Coronary	16:75451461:CS1	0.950465	0.0963888	0.0107984	0.0715959	0.00900429	0.000828559	rs11149831
Abdominal Aortic Aneurysm	ENSG00000261783	Artery_Tibial	16:75451461:CS1	0.950465	0.0963888	0.00663392	0.0701004	0.00900429	0.000828559	rs11149831
Abdominal Aortic Aneurysm	ENSG00000261783	Brain_Cerebellum	16:75451461:CS1	0.950465	0.0963888	0.0140692	0.181147	0.00900429	0.000828559	rs11149831
Abdominal Aortic Aneurysm	ENSG00000261783	Colon_Sigmoid	16:75451461:CS1	0.950465	0.0963888	0.00950048	0.0913063	0.00900429	0.000828559	rs11149831
Abdominal Aortic Aneurysm	ENSG00000261783	Colon_Transverse	16:75451461:CS1	0.950465	0.0963888	0.00998684	0.0789693	0.00900429	0.000828559	rs11149831
Abdominal Aortic Aneurysm	ENSG00000261783	Esophagus_Junction	16:75451461:CS1	0.950465	0.0963888	0.00934472	0.123797	0.00900429	0.000828559	rs11149831
Abdominal Aortic Aneurysm	ENSG00000261783	Esophagus_Mucosa	16:75451461:CS1	0.950465	0.0963888	0.00326481	0.0457956	0.00452657	0.000402938	rs11149817~rs100912
Abdominal Aortic Aneurysm	ENSG00000261783	Esophagus_Muscularis	16:75451461:CS1	0.950465	0.0963888	0.225503	0.414968	0.226809	0.0240649	rs11149817~rs11149831
Abdominal Aortic Aneurysm	ENSG00000261783	Fibroblasts	16:75451461:CS1	0.950465	0.0963888	0.00173242	0	0.00261661	0.00022666	rs11149817~rs100912
Abdominal Aortic Aneurysm	ENSG00000261783	Heart_Atrial_Appendage	16:75451461:CS1	0.950465	0.0963888	0.00834274	0.0726484	0.00900429	0.000828559	rs11149831
Abdominal Aortic Aneurysm	ENSG00000261783	Heart_Left_Ventricle	16:75451461:CS1	0.950465	0.0963888	0.0101141	0.0710766	0.00900429	0.000828559	rs11149831
Abdominal Aortic Aneurysm	ENSG00000261783	Kidney_Glom	16:75451461:CS1	0.950465	0.0963888	0.00150461	0	0.00164415	0.000139088	rs11149817
Abdominal Aortic Aneurysm	ENSG00000261783	Kidney_Tube	16:75451461:CS1	0.950465	0.0963888	0.005807	0.0353843	0.00900429	0.000828559	rs11149831
Abdominal Aortic Aneurysm	ENSG00000261783	Liver	16:75451461:CS1	0.950465	0.0963888	0.00193685	0	0.00164415	0.000139088	rs11149817
Abdominal Aortic Aneurysm	ENSG00000261783	Lung	16:75451461:CS1	0.950465	0.0963888	0.00677871	0.0504082	0.00900429	0.000828559	rs11149831
Abdominal Aortic Aneurysm	ENSG00000261783	Lymphocytes	16:75451461:CS1	0.950465	0.0963888	0.470071	0.968232	0.211302	0.0223542	rs11149817~rs11149831
Abdominal Aortic Aneurysm	ENSG00000261783	Muscle_Skeletal	16:75451461:CS1	0.950465	0.0963888	0.0103763	0.123687	0.00900429	0.000828559	rs11149831
Abdominal Aortic Aneurysm	ENSG00000261783	Nerve_Tibial	16:75451461:CS1	0.950465	0.0963888	0.00689435	0.0611438	0.00900429	0.000828559	rs11149831
Abdominal Aortic Aneurysm	ENSG00000261783	Pancreas	16:75451461:CS1	0.950465	0.0963888	0.0111943	0.14345	0.00900429	0.000828559	rs11149831
Abdominal Aortic Aneurysm	ENSG00000261783	Pituitary	16:75451461:CS1	0.950465	0.0963888	0.0094537	0.135453	0.00900429	0.000828559	rs11149831
Abdominal Aortic Aneurysm	ENSG00000261783	Spleen	16:75451461:CS1	0.950465	0.0963888	0.0110135	0.110744	0.00900429	0.000828559	rs11149831
Abdominal Aortic Aneurysm	ENSG00000261783	Stomach	16:75451461:CS1	0.950465	0.0963888	0.00191537	0.0687699	0.00164415	0.000139088	rs11149817
Abdominal Aortic Aneurysm	ENSG00000261783	Thyroid	16:75451461:CS1	0.950465	0.0963888	0.00606326	0.0407004	0.00900429	0.000828559	rs11149831
Abdominal Aortic Aneurysm	TMEM170A	Esophagus_Muscularis	16:75451461:CS1	0.950465	0.0963888	0.0161276	0.157087	0.00900429	0.000828559	rs11149831
Abdominal Aortic Aneurysm	TMEM170A	Nerve_Tibial	16:75451461:CS1	0.950465	0.0963888	0.450043	0.838931	0.233991	0.0248588	rs11149817~rs11149831
Abdominal Aortic Aneurysm	TMEM170A	Stomach	16:75451461:CS1	0.950465	0.0963888	0.00587901	0	0.00164415	0.000139088	rs11149817
Abdominal Aortic Aneurysm	TMEM170A	Thyroid	16:75451461:CS1	0.950465	0.0963888	0.00313741	0	0.00164415	0.000139088	rs11149817
Abdominal Aortic Aneurysm	chr16:75305182:75395090:clu_14488:ENSG00000153774.8	Adrenal_Gland	16:75451461:CS1	0.950465	0.0963888	-0.00224461	0	0.00164415	0.000139088	rs11149817
Abdominal Aortic Aneurysm	chr16:75305182:75395090:clu_14488:ENSG00000261783.1	Adrenal_Gland	16:75451461:CS1	0.950465	0.0963888	-0.00225751	0	0.00164415	0.000139088	rs11149817
Abdominal Aortic Aneurysm	chr16:75305182:75395090:clu_14761:ENSG00000261783.1	Whole_Blood	16:75451461:CS1	0.950465	0.0963888	-0.00375298	0	0.00164415	0.000139088	rs11149817
Abdominal Aortic Aneurysm	chr16:75305182:75395090:clu_14889:ENSG00000153774.8	Fibroblasts	16:75451461:CS1	0.950465	0.0963888	-0.00124124	0	0.00164415	0.000139088	rs11149817
Abdominal Aortic Aneurysm	chr16:75305182:75395090:clu_14889:ENSG00000261783.1	Fibroblasts	16:75451461:CS1	0.950465	0.0963888	-0.00124573	0	0.00164415	0.000139088	rs11149817
Abdominal Aortic Aneurysm	chr16:75305182:75395090:clu_16176:ENSG00000153774.8	Stomach	16:75451461:CS1	0.950465	0.0963888	-0.00237294	0	0.00164415	0.000139088	rs11149817
Abdominal Aortic Aneurysm	chr16:75305182:75395090:clu_16176:ENSG00000261783.1	Stomach	16:75451461:CS1	0.950465	0.0963888	-0.00238344	0	0.00164415	0.000139088	rs11149817
Abdominal Aortic Aneurysm	chr16:75305182:75395090:clu_16441:ENSG00000153774.8	Artery_Aorta	16:75451461:CS1	0.950465	0.0963888	-0.00135488	0	0.00164415	0.000139088	rs11149817
Abdominal Aortic Aneurysm	chr16:75305182:75395090:clu_16441:ENSG00000261783.1	Artery_Aorta	16:75451461:CS1	0.950465	0.0963888	-0.00136322	0	0.00164415	0.000139088	rs11149817
Abdominal Aortic Aneurysm	chr16:75305182:75395090:clu_16483:ENSG00000153774.8	Colon_Sigmoid	16:75451461:CS1	0.950465	0.0963888	-0.00784133	0	0.00164415	0.000139088	rs11149817
Abdominal Aortic Aneurysm	chr16:75305182:75395090:clu_16939:ENSG00000153774.8	Esophagus_Mucosa	16:75451461:CS1	0.950465	0.0963888	-0.00123272	0.0557024	0.00164415	0.000139088	rs11149817
Abdominal Aortic Aneurysm	chr16:75305182:75395090:clu_16939:ENSG00000261783.1	Esophagus_Mucosa	16:75451461:CS1	0.950465	0.0963888	-0.00123859	0	0.00164415	0.000139088	rs11149817
Abdominal Aortic Aneurysm	chr16:75305182:75395090:clu_16941:ENSG00000153774.8	Esophagus_Muscularis	16:75451461:CS1	0.950465	0.0963888	-0.00152871	0	0.00164415	0.000139088	rs11149817
Abdominal Aortic Aneurysm	chr16:75305182:75395090:clu_16941:ENSG00000261783.1	Esophagus_Muscularis	16:75451461:CS1	0.950465	0.0963888	-0.00153241	0	0.00164415	0.000139088	rs11149817
Abdominal Aortic Aneurysm	chr16:75305182:75395090:clu_17120:ENSG00000153774.8	Artery_Tibial	16:75451461:CS1	0.950465	0.0963888	-0.00137831	0	0.00164415	0.000139088	rs11149817
Abdominal Aortic Aneurysm	chr16:75305182:75395090:clu_17120:ENSG00000261783.1	Artery_Tibial	16:75451461:CS1	0.950465	0.0963888	-0.00138155	0	0.00164415	0.000139088	rs11149817
Abdominal Aortic Aneurysm	chr16:75305182:75395090:clu_17950:ENSG00000153774.8	Adipose_Visceral	16:75451461:CS1	0.950465	0.0963888	-0.0013959	0.0442588	0.00164415	0.000139088	rs11149817
Abdominal Aortic Aneurysm	chr16:75305182:75395090:clu_17950:ENSG00000261783.1	Adipose_Visceral	16:75451461:CS1	0.950465	0.0963888	-0.00140384	0	0.00164415	0.000139088	rs11149817
Abdominal Aortic Aneurysm	chr16:75305182:75395090:clu_18562:ENSG00000153774.8	Adipose_Subcutaneous	16:75451461:CS1	0.950465	0.0963888	-0.00200204	0	0.00164415	0.000139088	rs11149817
Abdominal Aortic Aneurysm	chr16:75305182:75395090:clu_18562:ENSG00000261783.1	Adipose_Subcutaneous	16:75451461:CS1	0.950465	0.0963888	-0.00200643	0	0.00164415	0.000139088	rs11149817
Abdominal Aortic Aneurysm	chr16:75305182:75395090:clu_19623:ENSG00000153774.8	Thyroid	16:75451461:CS1	0.950465	0.0963888	-0.00127488	0.0392686	0.00164415	0.000139088	rs11149817
Abdominal Aortic Aneurysm	chr16:75305182:75395090:clu_19623:ENSG00000261783.1	Thyroid	16:75451461:CS1	0.950465	0.0963888	-0.00127867	0.0503789	0.00164415	0.000139088	rs11149817
Abdominal Aortic Aneurysm	chr16:75372568:75395090:clu_16939:ENSG00000153774.8	Esophagus_Mucosa	16:75451461:CS1	0.950465	0.0963888	-0.0150044	0.201401	0.00900429	0.000828559	rs11149831
Abdominal Aortic Aneurysm	chr16:75372568:75395090:clu_16939:ENSG00000261783.1	Esophagus_Mucosa	16:75451461:CS1	0.950465	0.0963888	-0.0150489	0.0887535	0.00900429	0.000828559	rs11149831
Abdominal Aortic Aneurysm	chr16:75380134:75381204:clu_14488:ENSG00000153774.8	Adrenal_Gland	16:75451461:CS1	0.950465	0.0963888	0.00154413	0	0.00164415	0.000139088	rs11149817
Abdominal Aortic Aneurysm	chr16:75380134:75381204:clu_14488:ENSG00000261783.1	Adrenal_Gland	16:75451461:CS1	0.950465	0.0963888	0.00155623	0	0.00164415	0.000139088	rs11149817
Abdominal Aortic Aneurysm	chr16:75380134:75381204:clu_16939:ENSG00000153774.8	Esophagus_Mucosa	16:75451461:CS1	0.950465	0.0963888	0.00106651	0	0.00164415	0.000139088	rs11149817
Abdominal Aortic Aneurysm	chr16:75380134:75381204:clu_16939:ENSG00000261783.1	Esophagus_Mucosa	16:75451461:CS1	0.950465	0.0963888	0.00107233	0	0.00164415	0.000139088	rs11149817
Abdominal Aortic Aneurysm	chr16:75380134:75395090:clu_14488:ENSG00000153774.8	Adrenal_Gland	16:75451461:CS1	0.950465	0.0963888	-0.00289718	0	0.00164415	0.000139088	rs11149817
Abdominal Aortic Aneurysm	chr16:75380134:75395090:clu_14488:ENSG00000261783.1	Adrenal_Gland	16:75451461:CS1	0.950465	0.0963888	-0.00293605	0	0.00164415	0.000139088	rs11149817
Abdominal Aortic Aneurysm	chr16:75380134:75395090:clu_14889:ENSG00000153774.8	Fibroblasts	16:75451461:CS1	0.950465	0.0963888	-0.00172277	0	0.00164415	0.000139088	rs11149817
Abdominal Aortic Aneurysm	chr16:75380134:75395090:clu_14889:ENSG00000261783.1	Fibroblasts	16:75451461:CS1	0.950465	0.0963888	-0.00172629	0.0719672	0.00164415	0.000139088	rs11149817
Abdominal Aortic Aneurysm	chr16:75380134:75395090:clu_16166:ENSG00000153774.8	Heart_Atrial_Appendage	16:75451461:CS1	0.950465	0.0963888	-0.00238826	0	0.00164415	0.000139088	rs11149817
Abdominal Aortic Aneurysm	chr16:75380134:75395090:clu_16166:ENSG00000261783.1	Heart_Atrial_Appendage	16:75451461:CS1	0.950465	0.0963888	-0.00239497	0	0.00164415	0.000139088	rs11149817
Abdominal Aortic Aneurysm	chr16:75395209:75411825:clu_16940:ENSG00000153774.8	Esophagus_Mucosa	16:75451461:CS1	0.950465	0.0963888	0.00163588	0.0665312	0.00164415	0.000139088	rs11149817
Abdominal Aortic Aneurysm	chr16:75406698:75411825:clu_16442:ENSG00000153774.8	Artery_Aorta	16:75451461:CS1	0.950465	0.0963888	-0.0030283	0	0.00164415	0.000139088	rs11149817
Abdominal Aortic Aneurysm	CRISPLD2	Adipose_Subcutaneous	16:84919525:CS2	0.988927	0.0313749	0.384973	0.398001	0.494464	0.0156875	rs1874014
Abdominal Aortic Aneurysm	KIAA0513	Adipose_Visceral	16:84919525:CS2	0.988927	0.0313749	-0.891381	0.923369	0.494464	0.0156875	rs1874014
Abdominal Aortic Aneurysm	RNFT1	Nerve_Tibial	17:57830473:CS1	0.99994	0.323602	0.238127	0.823227	0.0909036	0.0294183	rs1292055
Abdominal Aortic Aneurysm	RPS6KB1	Whole_Blood	17:57830473:CS1	0.99994	0.323602	-0.25558	0.78714	0.0909036	0.0294183	rs1292055
Abdominal Aortic Aneurysm	TUBD1	Nerve_Tibial	17:57830473:CS1	0.99994	0.323602	0.327878	0.984554	0.0909036	0.0294183	rs1292055
Abdominal Aortic Aneurysm	chr17:59937774:59940836:clu_13770:ENSG00000108443.13	Artery_Tibial	17:57830473:CS1	0.99994	0.323602	0.415921	1.25419	0.0909036	0.0294183	rs1292055
Abdominal Aortic Aneurysm	chr17:59953111:59954045:clu_12552:ENSG00000189050.15	Brain_Cerebellum	17:57830473:CS1	0.99994	0.323602	0.179377	0.563236	0.0909036	0.0294183	rs1292055
Abdominal Aortic Aneurysm	chr17:59953111:59954045:clu_13093:ENSG00000189050.15	Muscle_Skeletal	17:57830473:CS1	0.99994	0.323602	0.0874465	0.270744	0.0909036	0.0294183	rs1292055
Abdominal Aortic Aneurysm	chr17:59953111:59954045:clu_15741:ENSG00000189050.15	Thyroid	17:57830473:CS1	0.99994	0.323602	0.0966579	0.298293	0.0909036	0.0294183	rs1292055
Abdominal Aortic Aneurysm	chr17:59954146:59956488:clu_12552:ENSG00000189050.15	Brain_Cerebellum	17:57830473:CS1	0.99994	0.323602	-0.172585	0.539338	0.0909036	0.0294183	rs1292055
Abdominal Aortic Aneurysm	chr17:59954146:59956488:clu_13093:ENSG00000189050.15	Muscle_Skeletal	17:57830473:CS1	0.99994	0.323602	-0.0858869	0.267747	0.0909036	0.0294183	rs1292055
Abdominal Aortic Aneurysm	chr17:59954146:59956488:clu_15741:ENSG00000189050.15	Thyroid	17:57830473:CS1	0.99994	0.323602	-0.0954809	0.325295	0.0909036	0.0294183	rs1292055
Abdominal Aortic Aneurysm	chr17:60623749:60633853:clu_13799:ENSG00000170836.11	Artery_Tibial	17:57830473:CS1	0.99994	0.323602	-0.980095	3.0867	0.0909036	0.0294183	rs1292055
Abdominal Aortic Aneurysm	MRC2	Artery_Aorta	17:60767135:CS1	0.978436	0.218795	1.05585	0.324754	0.949794	0.213182	rs11657101~rs12386061
Abdominal Aortic Aneurysm	MRC2	Artery_Tibial	17:60767135:CS1	0.978436	0.218795	0.0449233	0.343632	0.0286414	0.00561319	rs146385050~rs12386061
Abdominal Aortic Aneurysm	CCDC47	Artery_Tibial	17:60767135:CS2	0.950159	0.0607896	-0.0395885	0	0.00857463	0.000547944	rs61360320
Abdominal Aortic Aneurysm	CCDC47	Fibroblasts	17:60767135:CS2	0.950159	0.0607896	-0.00783587	0.0545928	0.00857463	0.000547944	rs61360320
Abdominal Aortic Aneurysm	CCDC47	Nerve_Tibial	17:60767135:CS2	0.950159	0.0607896	-0.00965075	0.0768693	0.00857463	0.000547944	rs61360320
Abdominal Aortic Aneurysm	CCDC47	Stomach	17:60767135:CS2	0.950159	0.0607896	-0.0190646	0.148953	0.00857463	0.000547944	rs61360320
Abdominal Aortic Aneurysm	DCAF7	Adipose_Subcutaneous	17:60767135:CS2	0.950159	0.0607896	-0.013922	0.160141	0.00857463	0.000547944	rs61360320
Abdominal Aortic Aneurysm	DDX42	Artery_Tibial	17:60767135:CS2	0.950159	0.0607896	0.00697215	0.0680188	0.0140329	0.000958487	rs61360320~rs8077013
Abdominal Aortic Aneurysm	DDX42	Brain_Cerebellum	17:60767135:CS2	0.950159	0.0607896	0.00670698	0	0.00857463	0.000547944	rs61360320
Abdominal Aortic Aneurysm	DDX42	Brain_Cortex	17:60767135:CS2	0.950159	0.0607896	0.00673078	0.08872	0.00857463	0.000547944	rs61360320
Abdominal Aortic Aneurysm	DDX42	Esophagus_Junction	17:60767135:CS2	0.950159	0.0607896	0.0115199	0.153033	0.00857463	0.000547944	rs61360320
Abdominal Aortic Aneurysm	DDX42	Esophagus_Mucosa	17:60767135:CS2	0.950159	0.0607896	0.00490923	0.0763178	0.00568089	0.00034695	rs61360320~rs8077013
Abdominal Aortic Aneurysm	DDX42	Heart_Atrial_Appendage	17:60767135:CS2	0.950159	0.0607896	0.00922593	0.0993822	0.00857463	0.000547944	rs61360320
Abdominal Aortic Aneurysm	DDX42	Heart_Left_Ventricle	17:60767135:CS2	0.950159	0.0607896	0.0225989	0.226262	0.00857463	0.000547944	rs61360320
Abdominal Aortic Aneurysm	DDX42	Kidney_Glom	17:60767135:CS2	0.950159	0.0607896	-0.00330991	0	0.00857463	0.000547944	rs61360320
Abdominal Aortic Aneurysm	DDX42	Kidney_Tube	17:60767135:CS2	0.950159	0.0607896	-0.00289483	0.01752	0.00857463	0.000547944	rs61360320
Abdominal Aortic Aneurysm	DDX42	Pancreas	17:60767135:CS2	0.950159	0.0607896	0.00553369	0.0417927	0.00857463	0.000547944	rs61360320
Abdominal Aortic Aneurysm	DDX42	Pituitary	17:60767135:CS2	0.950159	0.0607896	0.0301581	0.369041	0.00857463	0.000547944	rs61360320
Abdominal Aortic Aneurysm	DDX42	Stomach	17:60767135:CS2	0.950159	0.0607896	0.00690743	0.0961727	0.00857463	0.000547944	rs61360320
Abdominal Aortic Aneurysm	EEF1DP7	Adipose_Subcutaneous	17:60767135:CS2	0.950159	0.0607896	-0.0298328	0.312284	0.00857463	0.000547944	rs61360320
Abdominal Aortic Aneurysm	EEF1DP7	Artery_Aorta	17:60767135:CS2	0.950159	0.0607896	-0.0174211	0.2421	0.00857463	0.000547944	rs61360320
Abdominal Aortic Aneurysm	EEF1DP7	Lung	17:60767135:CS2	0.950159	0.0607896	-0.00853853	0.0606553	0.00857463	0.000547944	rs61360320
Abdominal Aortic Aneurysm	EEF1DP7	Nerve_Tibial	17:60767135:CS2	0.950159	0.0607896	-0.00966382	0.103228	0.00857463	0.000547944	rs61360320
Abdominal Aortic Aneurysm	EEF1DP7	Thyroid	17:60767135:CS2	0.950159	0.0607896	-0.0210737	0.173419	0.00857463	0.000547944	rs61360320
Abdominal Aortic Aneurysm	EEF1DP7	Whole_Blood	17:60767135:CS2	0.950159	0.0607896	-0.00627072	0.0896204	0.00857463	0.000547944	rs61360320
Abdominal Aortic Aneurysm	ENSG00000279369	Adipose_Subcutaneous	17:60767135:CS2	0.950159	0.0607896	0.0520093	0.750685	0.00857463	0.000547944	rs61360320
Abdominal Aortic Aneurysm	ENSG00000279369	Esophagus_Muscularis	17:60767135:CS2	0.950159	0.0607896	0.0122827	0.138447	0.00857463	0.000547944	rs61360320
Abdominal Aortic Aneurysm	ENSG00000279369	Nerve_Tibial	17:60767135:CS2	0.950159	0.0607896	0.00798528	0.106724	0.00857463	0.000547944	rs61360320
Abdominal Aortic Aneurysm	ENSG00000279369	Whole_Blood	17:60767135:CS2	0.950159	0.0607896	0.00695555	0.0711382	0.00857463	0.000547944	rs61360320
Abdominal Aortic Aneurysm	LIMD2	Nerve_Tibial	17:60767135:CS2	0.950159	0.0607896	-0.0124775	0.0954526	0.00857463	0.000547944	rs61360320
Abdominal Aortic Aneurysm	LIMD2	Whole_Blood	17:60767135:CS2	0.950159	0.0607896	-0.00921984	0.0828467	0.00857463	0.000547944	rs61360320
Abdominal Aortic Aneurysm	MAP3K3	Adipose_Subcutaneous	17:60767135:CS2	0.950159	0.0607896	-0.00627412	0.094687	0.00857463	0.000547944	rs61360320
Abdominal Aortic Aneurysm	MAP3K3	Adipose_Visceral	17:60767135:CS2	0.950159	0.0607896	-0.00537447	0.0530462	0.00857463	0.000547944	rs61360320
Abdominal Aortic Aneurysm	MAP3K3	Artery_Aorta	17:60767135:CS2	0.950159	0.0607896	-0.00572656	0.0700707	0.00857463	0.000547944	rs61360320
Abdominal Aortic Aneurysm	MAP3K3	Artery_Tibial	17:60767135:CS2	0.950159	0.0607896	-0.00666624	0.0716148	0.00857463	0.000547944	rs61360320
Abdominal Aortic Aneurysm	MAP3K3	Brain_Cerebellum	17:60767135:CS2	0.950159	0.0607896	-0.00923333	0.0748861	0.00857463	0.000547944	rs61360320
Abdominal Aortic Aneurysm	MAP3K3	Colon_Sigmoid	17:60767135:CS2	0.950159	0.0607896	-0.028584	0.4519	0.00857463	0.000547944	rs61360320
Abdominal Aortic Aneurysm	MAP3K3	Colon_Transverse	17:60767135:CS2	0.950159	0.0607896	-0.0351736	0.394411	0.00857463	0.000547944	rs61360320
Abdominal Aortic Aneurysm	MAP3K3	Brain_Cortex	17:60767135:CS2	0.950159	0.0607896	-0.0121808	0.197629	0.00857463	0.000547944	rs61360320
Abdominal Aortic Aneurysm	MAP3K3	Esophagus_Junction	17:60767135:CS2	0.950159	0.0607896	-0.0103195	0.0882818	0.00857463	0.000547944	rs61360320
Abdominal Aortic Aneurysm	MAP3K3	Esophagus_Mucosa	17:60767135:CS2	0.950159	0.0607896	-0.0058517	0.0811939	0.00857463	0.000547944	rs61360320
Abdominal Aortic Aneurysm	MAP3K3	Esophagus_Muscularis	17:60767135:CS2	0.950159	0.0607896	-0.00543437	0.0866107	0.00857463	0.000547944	rs61360320
Abdominal Aortic Aneurysm	MAP3K3	Fibroblasts	17:60767135:CS2	0.950159	0.0607896	-0.0069664	0.0727289	0.00857463	0.000547944	rs61360320
Abdominal Aortic Aneurysm	MAP3K3	Heart_Atrial_Appendage	17:60767135:CS2	0.950159	0.0607896	-0.0274774	0.428021	0.00857463	0.000547944	rs61360320
Abdominal Aortic Aneurysm	MAP3K3	Heart_Left_Ventricle	17:60767135:CS2	0.950159	0.0607896	-0.00794591	0.0944501	0.00857463	0.000547944	rs61360320
Abdominal Aortic Aneurysm	MAP3K3	Liver	17:60767135:CS2	0.950159	0.0607896	-0.0114933	0.216717	0.00857463	0.000547944	rs61360320
Abdominal Aortic Aneurysm	MAP3K3	Lung	17:60767135:CS2	0.950159	0.0607896	-0.0053351	0.0274056	0.00857463	0.000547944	rs61360320
Abdominal Aortic Aneurysm	MAP3K3	Muscle_Skeletal	17:60767135:CS2	0.950159	0.0607896	-0.00596104	0.0829193	0.00857463	0.000547944	rs61360320
Abdominal Aortic Aneurysm	MAP3K3	Nerve_Tibial	17:60767135:CS2	0.950159	0.0607896	-0.00468167	0.0621858	0.00857463	0.000547944	rs61360320
Abdominal Aortic Aneurysm	MAP3K3	Pancreas	17:60767135:CS2	0.950159	0.0607896	-0.0235063	0.28245	0.00857463	0.000547944	rs61360320
Abdominal Aortic Aneurysm	MAP3K3	Pituitary	17:60767135:CS2	0.950159	0.0607896	-0.00684459	0.0921351	0.00857463	0.000547944	rs61360320
Abdominal Aortic Aneurysm	MAP3K3	Small_Intestine	17:60767135:CS2	0.950159	0.0607896	-0.00933555	0.123173	0.00857463	0.000547944	rs61360320
Abdominal Aortic Aneurysm	MAP3K3	Spleen	17:60767135:CS2	0.950159	0.0607896	-0.00621987	0.0667981	0.00857463	0.000547944	rs61360320
Abdominal Aortic Aneurysm	MAP3K3	Stomach	17:60767135:CS2	0.950159	0.0607896	-0.0102296	0.0980723	0.00857463	0.000547944	rs61360320
Abdominal Aortic Aneurysm	MAP3K3	Thyroid	17:60767135:CS2	0.950159	0.0607896	-0.00477505	0.0311768	0.00857463	0.000547944	rs61360320
Abdominal Aortic Aneurysm	MILR1	Muscle_Skeletal	17:60767135:CS2	0.950159	0.0607896	-0.017099	0.23848	0.00857463	0.000547944	rs61360320
Abdominal Aortic Aneurysm	SMARCD2	Whole_Blood	17:60767135:CS2	0.950159	0.0607896	-0.00523705	0.0621447	0.00857463	0.000547944	rs61360320
Abdominal Aortic Aneurysm	STRADA	Artery_Aorta	17:60767135:CS2	0.950159	0.0607896	-0.0347846	0.468579	0.00857463	0.000547944	rs61360320
Abdominal Aortic Aneurysm	STRADA	Thyroid	17:60767135:CS2	0.950159	0.0607896	-0.00911663	0.103989	0.0101224	0.000659955	rs141880461~rs61360320
Abdominal Aortic Aneurysm	STRADA	Whole_Blood	17:60767135:CS2	0.950159	0.0607896	-0.00645093	0.0644744	0.00857463	0.000547944	rs61360320
Abdominal Aortic Aneurysm	chr17:63657907:63666940:clu_12366:ENSG00000198909.7	Spleen	17:60767135:CS2	0.950159	0.0607896	0.01164	0.123531	0.00857463	0.000547944	rs61360320
Abdominal Aortic Aneurysm	chr17:63657907:63666940:clu_15399:ENSG00000198909.7	Nerve_Tibial	17:60767135:CS2	0.950159	0.0607896	0.00954374	0.0841521	0.00857463	0.000547944	rs61360320
Abdominal Aortic Aneurysm	chr17:63667060:63681766:clu_15399:ENSG00000198909.7	Nerve_Tibial	17:60767135:CS2	0.950159	0.0607896	-0.0116954	0.115321	0.00857463	0.000547944	rs61360320
Abdominal Aortic Aneurysm	chr17:63704582:63706635:clu_11863:ENSG00000266173.6	Brain_Cortex	17:60767135:CS2	0.950159	0.0607896	0.0232515	0.298855	0.00857463	0.000547944	rs61360320
Abdominal Aortic Aneurysm	chr17:63704582:63706635:clu_12277:ENSG00000266173.6	Artery_Coronary	17:60767135:CS2	0.950159	0.0607896	0.0195277	0.200778	0.00857463	0.000547944	rs61360320
Abdominal Aortic Aneurysm	chr17:63704582:63706635:clu_12942:ENSG00000266173.6	Esophagus_Junction	17:60767135:CS2	0.950159	0.0607896	0.00861213	0.142276	0.00857463	0.000547944	rs61360320
Abdominal Aortic Aneurysm	chr17:63704582:63706635:clu_13294:ENSG00000266173.6	Colon_Sigmoid	17:60767135:CS2	0.950159	0.0607896	0.00724927	0.0846342	0.00857463	0.000547944	rs61360320
Abdominal Aortic Aneurysm	chr17:63704582:63706635:clu_13341:ENSG00000266173.6	Artery_Aorta	17:60767135:CS2	0.950159	0.0607896	0.00617901	0	0.00396978	0.000229136	rs28710772~rs61360320
Abdominal Aortic Aneurysm	chr17:63704582:63706635:clu_13627:ENSG00000266173.6	Esophagus_Mucosa	17:60767135:CS2	0.950159	0.0607896	0.0110828	0.104563	0.00857463	0.000547944	rs61360320
Abdominal Aortic Aneurysm	chr17:63704582:63706635:clu_13688:ENSG00000266173.6	Esophagus_Muscularis	17:60767135:CS2	0.950159	0.0607896	0.00759772	0.0947315	0.00857463	0.000547944	rs61360320
Abdominal Aortic Aneurysm	chr17:63704582:63706635:clu_13891:ENSG00000266173.6	Artery_Tibial	17:60767135:CS2	0.950159	0.0607896	0.00647882	0.0785133	0.00857463	0.000547944	rs61360320
Abdominal Aortic Aneurysm	chr17:63704582:63706635:clu_14295:ENSG00000266173.6	Colon_Transverse	17:60767135:CS2	0.950159	0.0607896	0.00977684	0.118454	0.00857463	0.000547944	rs61360320
Abdominal Aortic Aneurysm	chr17:63704582:63706635:clu_15412:ENSG00000266173.6	Nerve_Tibial	17:60767135:CS2	0.950159	0.0607896	0.00752264	0.0538397	0.00857463	0.000547944	rs61360320
Abdominal Aortic Aneurysm	chr17:63704582:63706635:clu_15870:ENSG00000266173.6	Thyroid	17:60767135:CS2	0.950159	0.0607896	0.00861566	0.0583337	0.00857463	0.000547944	rs61360320
Abdominal Aortic Aneurysm	chr17:63704908:63706635:clu_11830:ENSG00000266173.6	Whole_Blood	17:60767135:CS2	0.950159	0.0607896	-0.00987831	0.117617	0.00857463	0.000547944	rs61360320
Abdominal Aortic Aneurysm	chr17:63704908:63706635:clu_12277:ENSG00000266173.6	Artery_Coronary	17:60767135:CS2	0.950159	0.0607896	-0.0203434	0.238997	0.00857463	0.000547944	rs61360320
Abdominal Aortic Aneurysm	chr17:63704908:63706635:clu_12639:ENSG00000266173.6	Brain_Cerebellum	17:60767135:CS2	0.950159	0.0607896	-0.0104476	0.117686	0.00857463	0.000547944	rs61360320
Abdominal Aortic Aneurysm	chr17:63704908:63706635:clu_12942:ENSG00000266173.6	Esophagus_Junction	17:60767135:CS2	0.950159	0.0607896	-0.00688297	0.0933045	0.00857463	0.000547944	rs61360320
Abdominal Aortic Aneurysm	chr17:63704908:63706635:clu_13208:ENSG00000266173.6	Muscle_Skeletal	17:60767135:CS2	0.950159	0.0607896	-0.00784424	0.116945	0.00857463	0.000547944	rs61360320
Abdominal Aortic Aneurysm	chr17:63704908:63706635:clu_13294:ENSG00000266173.6	Colon_Sigmoid	17:60767135:CS2	0.950159	0.0607896	-0.00712774	0.0906437	0.00857463	0.000547944	rs61360320
Abdominal Aortic Aneurysm	chr17:63704908:63706635:clu_13341:ENSG00000266173.6	Artery_Aorta	17:60767135:CS2	0.950159	0.0607896	-0.00961873	0.132409	0.00857463	0.000547944	rs61360320
Abdominal Aortic Aneurysm	chr17:63704908:63706635:clu_13627:ENSG00000266173.6	Esophagus_Mucosa	17:60767135:CS2	0.950159	0.0607896	-0.00634961	0.070428	0.00857463	0.000547944	rs61360320
Abdominal Aortic Aneurysm	chr17:63704908:63706635:clu_13688:ENSG00000266173.6	Esophagus_Muscularis	17:60767135:CS2	0.950159	0.0607896	-0.00688327	0.0654403	0.00857463	0.000547944	rs61360320
Abdominal Aortic Aneurysm	chr17:63704908:63706635:clu_13891:ENSG00000266173.6	Artery_Tibial	17:60767135:CS2	0.950159	0.0607896	-0.00551107	0.053599	0.00857463	0.000547944	rs61360320
Abdominal Aortic Aneurysm	chr17:63704908:63706635:clu_14171:ENSG00000266173.6	Pituitary	17:60767135:CS2	0.950159	0.0607896	-0.0172455	0	0.00857463	0.000547944	rs61360320
Abdominal Aortic Aneurysm	chr17:63704908:63706635:clu_14576:ENSG00000266173.6	Adipose_Visceral	17:60767135:CS2	0.950159	0.0607896	-0.00799411	0.0708909	0.00857463	0.000547944	rs61360320
Abdominal Aortic Aneurysm	chr17:63704908:63706635:clu_15412:ENSG00000266173.6	Nerve_Tibial	17:60767135:CS2	0.950159	0.0607896	-0.0100676	0.110447	0.00857463	0.000547944	rs61360320
Abdominal Aortic Aneurysm	chr17:63704908:63706635:clu_15870:ENSG00000266173.6	Thyroid	17:60767135:CS2	0.950159	0.0607896	-0.00715313	0.0984441	0.00857463	0.000547944	rs61360320
Abdominal Aortic Aneurysm	chr17:63774376:63775108:clu_13896:ENSG00000198231.12	Artery_Tibial	17:60767135:CS2	0.950159	0.0607896	0.0240865	0.260422	0.00857463	0.000547944	rs61360320
Abdominal Aortic Aneurysm	chr17:63774376:63787034:clu_12205:ENSG00000198231.12	Fibroblasts	17:60767135:CS2	0.950159	0.0607896	0.0152402	0.163364	0.00857463	0.000547944	rs61360320
Abdominal Aortic Aneurysm	chr17:63774376:63787034:clu_13896:ENSG00000198231.12	Artery_Tibial	17:60767135:CS2	0.950159	0.0607896	0.00880832	0.0627592	0.00857463	0.000547944	rs61360320
Abdominal Aortic Aneurysm	chr17:63774376:63787034:clu_15098:ENSG00000198231.12	Adipose_Subcutaneous	17:60767135:CS2	0.950159	0.0607896	0.0244556	0.233822	0.00857463	0.000547944	rs61360320
Abdominal Aortic Aneurysm	chr17:63775178:63787034:clu_15875:ENSG00000198231.12	Thyroid	17:60767135:CS2	0.950159	0.0607896	0.011401	0.122927	0.00857463	0.000547944	rs61360320
Abdominal Aortic Aneurysm	chr17:63787270:63792412:clu_12205:ENSG00000198231.12	Fibroblasts	17:60767135:CS2	0.950159	0.0607896	-0.00672868	0.0515319	0.00857463	0.000547944	rs61360320
Abdominal Aortic Aneurysm	chr17:63787270:63792412:clu_12950:ENSG00000198231.12	Esophagus_Junction	17:60767135:CS2	0.950159	0.0607896	-0.0321578	0.237987	0.00857463	0.000547944	rs61360320
Abdominal Aortic Aneurysm	chr17:63787270:63792412:clu_13019:ENSG00000198231.12	Stomach	17:60767135:CS2	0.950159	0.0607896	-0.0123093	0.188155	0.00857463	0.000547944	rs61360320
Abdominal Aortic Aneurysm	chr17:63787270:63792412:clu_13105:ENSG00000198231.12	Heart_Atrial_Appendage	17:60767135:CS2	0.950159	0.0607896	-0.00663872	0.124305	0.00302621	0.000167996	rs28710772~rs61360320
Abdominal Aortic Aneurysm	chr17:63787270:63792412:clu_13212:ENSG00000198231.12	Muscle_Skeletal	17:60767135:CS2	0.950159	0.0607896	-0.00674269	0.121894	0.00617251	0.0003784	rs28710772~rs61360320
Abdominal Aortic Aneurysm	chr17:63787270:63792412:clu_13347:ENSG00000198231.12	Artery_Aorta	17:60767135:CS2	0.950159	0.0607896	-0.0161119	0.174556	0.00857463	0.000547944	rs61360320
Abdominal Aortic Aneurysm	chr17:63787270:63792412:clu_13633:ENSG00000198231.12	Esophagus_Mucosa	17:60767135:CS2	0.950159	0.0607896	-0.010515	0.123912	0.00857463	0.000547944	rs61360320
Abdominal Aortic Aneurysm	chr17:63787270:63792412:clu_13896:ENSG00000198231.12	Artery_Tibial	17:60767135:CS2	0.950159	0.0607896	-0.00723564	0.0897648	0.00857463	0.000547944	rs61360320
Abdominal Aortic Aneurysm	chr17:63787270:63792412:clu_15098:ENSG00000198231.12	Adipose_Subcutaneous	17:60767135:CS2	0.950159	0.0607896	-0.00701207	0.0927644	0.00857463	0.000547944	rs61360320
Abdominal Aortic Aneurysm	chr17:63787270:63792412:clu_15836:ENSG00000198231.12	Lung	17:60767135:CS2	0.950159	0.0607896	-0.00734525	0.0991433	0.00857463	0.000547944	rs61360320
Abdominal Aortic Aneurysm	chr17:63787270:63792412:clu_15875:ENSG00000198231.12	Thyroid	17:60767135:CS2	0.950159	0.0607896	-0.00728341	0.0639088	0.00857463	0.000547944	rs61360320
Abdominal Aortic Aneurysm	chr17:63822168:63822665:clu_13899:ENSG00000108592.16	Artery_Tibial	17:60767135:CS2	0.950159	0.0607896	0.0119623	0.174551	0.00857463	0.000547944	rs61360320
Abdominal Aortic Aneurysm	chr17:63830501:63830809:clu_13705:ENSG00000087191.12	Esophagus_Muscularis	17:60767135:CS2	0.950159	0.0607896	-0.0338257	0.220512	0.015393	0.00106243	rs61360320~rs8077013
Abdominal Aortic Aneurysm	chr17:63830501:63830809:clu_15847:ENSG00000087191.12	Lung	17:60767135:CS2	0.950159	0.0607896	-0.0455057	0.691631	0.00857463	0.000547944	rs61360320
Abdominal Aortic Aneurysm	chr17:63830501:63830809:clu_15887:ENSG00000087191.12	Thyroid	17:60767135:CS2	0.950159	0.0607896	-0.00987208	0.116834	0.00857463	0.000547944	rs61360320
Abdominal Aortic Aneurysm	chr17:64547801:64551584:clu_15941:ENSG00000108854.15	Thyroid	17:60767135:CS2	0.950159	0.0607896	-0.017609	0	0.00857463	0.000547944	rs61360320
Abdominal Aortic Aneurysm	chr17:64551704:64554856:clu_15941:ENSG00000108854.15	Thyroid	17:60767135:CS2	0.950159	0.0607896	0.0164806	0.226394	0.00857463	0.000547944	rs61360320
Abdominal Aortic Aneurysm	chr17:64561603:64562771:clu_12335:ENSG00000108854.15	Artery_Coronary	17:60767135:CS2	0.950159	0.0607896	0.0169502	0.159984	0.00857463	0.000547944	rs61360320
Abdominal Aortic Aneurysm	chr17:64561603:64562883:clu_12335:ENSG00000108854.15	Artery_Coronary	17:60767135:CS2	0.950159	0.0607896	-0.0143672	0.13012	0.00857463	0.000547944	rs61360320
Abdominal Aortic Aneurysm	chr17:64593573:64598382:clu_15163:ENSG00000108854.15	Adipose_Subcutaneous	17:60767135:CS2	0.950159	0.0607896	0.180104	1.94818	0.00857463	0.000547944	rs61360320
Abdominal Aortic Aneurysm	ENSG00000265656	Lymphocytes	18:20282856:CS2	0.999975	0.0843529	6.10029	1.0338	0.999975	0.0843529	rs55741412
Abdominal Aortic Aneurysm	ME2	Adrenal_Gland	18:48604010:CS1	0.999736	0.149088	-0.40173	0.604734	0.29212	0.0438368	rs79676369
Abdominal Aortic Aneurysm	chr18:50280017:50281363:clu_21380:ENSG00000141644.17	Heart_Left_Ventricle	18:48604010:CS1	0.999736	0.149088	-2.34501	3.60809	0.29212	0.0438368	rs79676369
Abdominal Aortic Aneurysm	chr18:50285928:50286022:clu_28899:ENSG00000154832.14	Lung	18:48604010:CS1	0.999736	0.149088	0.382852	0.644059	0.29212	0.0438368	rs79676369
Abdominal Aortic Aneurysm	chr18:50286257:50286539:clu_28899:ENSG00000154832.14	Lung	18:48604010:CS1	0.999736	0.149088	-0.195163	0.545147	0.123375	0.017578	rs11555886~rs79676369~rs35741063
Abdominal Aortic Aneurysm	DOT1L	Colon_Sigmoid	19:2236637:CS1	0.985264	0.0295934	-0.0325101	0.191656	0.0345573	0.00100396	rs111610547
Abdominal Aortic Aneurysm	DOT1L	Esophagus_Muscularis	19:2236637:CS1	0.985264	0.0295934	-0.132222	0.363129	0.132129	0.00429027	rs111610547~rs78566095
Abdominal Aortic Aneurysm	DOT1L	Pituitary	19:2236637:CS1	0.985264	0.0295934	-0.117826	0.643762	0.0345573	0.00100396	rs111610547
Abdominal Aortic Aneurysm	PLEKHJ1	Adipose_Visceral	19:2236637:CS1	0.985264	0.0295934	-0.0981129	0.480645	0.0345573	0.00100396	rs111610547
Abdominal Aortic Aneurysm	PLEKHJ1	Artery_Aorta	19:2236637:CS1	0.985264	0.0295934	-0.104274	0.530972	0.0345573	0.00100396	rs111610547
Abdominal Aortic Aneurysm	PLEKHJ1	Artery_Tibial	19:2236637:CS1	0.985264	0.0295934	-0.0228808	0.120453	0.0345573	0.00100396	rs111610547
Abdominal Aortic Aneurysm	PLEKHJ1	Brain_Cerebellum	19:2236637:CS1	0.985264	0.0295934	-0.116699	0.640423	0.0345573	0.00100396	rs111610547
Abdominal Aortic Aneurysm	PLEKHJ1	Colon_Sigmoid	19:2236637:CS1	0.985264	0.0295934	-0.0495528	0.265177	0.0345573	0.00100396	rs111610547
Abdominal Aortic Aneurysm	PLEKHJ1	Esophagus_Junction	19:2236637:CS1	0.985264	0.0295934	-0.0324726	0.183023	0.0345573	0.00100396	rs111610547
Abdominal Aortic Aneurysm	PLEKHJ1	Esophagus_Muscularis	19:2236637:CS1	0.985264	0.0295934	-0.0267262	0.147758	0.0345573	0.00100396	rs111610547
Abdominal Aortic Aneurysm	PLEKHJ1	Fibroblasts	19:2236637:CS1	0.985264	0.0295934	-0.0376743	0.19633	0.0345573	0.00100396	rs111610547
Abdominal Aortic Aneurysm	PLEKHJ1	Kidney_Tube	19:2236637:CS1	0.985264	0.0295934	-0.033292	0.175536	0.0345573	0.00100396	rs111610547
Abdominal Aortic Aneurysm	PLEKHJ1	Muscle_Skeletal	19:2236637:CS1	0.985264	0.0295934	-0.0269577	0.159391	0.0345573	0.00100396	rs111610547
Abdominal Aortic Aneurysm	PLEKHJ1	Nerve_Tibial	19:2236637:CS1	0.985264	0.0295934	-0.0283947	0.146406	0.0345573	0.00100396	rs111610547
Abdominal Aortic Aneurysm	PLEKHJ1	Whole_Blood	19:2236637:CS1	0.985264	0.0295934	-0.0327813	0.153645	0.0345573	0.00100396	rs111610547
Abdominal Aortic Aneurysm	chr19:1482207:1482402:clu_21327:ENSG00000115257.15	Esophagus_Muscularis	19:2236637:CS1	0.985264	0.0295934	-0.0557095	0.337108	0.0345573	0.00100396	rs111610547
Abdominal Aortic Aneurysm	chr19:2223486:2225388:clu_20230:ENSG00000104885.17	Esophagus_Junction	19:2236637:CS1	0.985264	0.0295934	0.0288461	0.130209	0.0345573	0.00100396	rs111610547
Abdominal Aortic Aneurysm	chr19:2223486:2225388:clu_20712:ENSG00000104885.17	Artery_Aorta	19:2236637:CS1	0.985264	0.0295934	0.0861322	0.300716	0.0633095	0.00190252	rs144821294~rs111610547
Abdominal Aortic Aneurysm	chr19:2223486:2225388:clu_20786:ENSG00000104885.17	Colon_Sigmoid	19:2236637:CS1	0.985264	0.0295934	0.0260937	0.15525	0.0345573	0.00100396	rs111610547
Abdominal Aortic Aneurysm	chr19:2223486:2225388:clu_21418:ENSG00000104885.17	Esophagus_Muscularis	19:2236637:CS1	0.985264	0.0295934	0.126113	0.316923	0.133236	0.00432529	rs111610547~rs78566095
Abdominal Aortic Aneurysm	chr19:2223486:2225388:clu_22683:ENSG00000104885.17	Adipose_Visceral	19:2236637:CS1	0.985264	0.0295934	0.0442154	0.274692	0.0345573	0.00100396	rs111610547
Abdominal Aortic Aneurysm	chr19:2224121:2225388:clu_20786:ENSG00000104885.17	Colon_Sigmoid	19:2236637:CS1	0.985264	0.0295934	-0.0452676	0.261883	0.0345573	0.00100396	rs111610547
Abdominal Aortic Aneurysm	AMH	Adipose_Subcutaneous	19:2236637:CS2	0.951396	0.0241946	0.0340647	0.133261	0.0611932	0.00153209	rs8113528~rs2074860
Abdominal Aortic Aneurysm	AMH	Adipose_Visceral	19:2236637:CS2	0.951396	0.0241946	0.0169095	0.0848138	0.0356009	0.000912868	rs2074860
Abdominal Aortic Aneurysm	AMH	Adrenal_Gland	19:2236637:CS2	0.951396	0.0241946	0.027959	0.14332	0.0356009	0.000912868	rs2074860
Abdominal Aortic Aneurysm	AMH	Artery_Aorta	19:2236637:CS2	0.951396	0.0241946	0.0186978	0.0943021	0.0356009	0.000912868	rs2074860
Abdominal Aortic Aneurysm	AMH	Artery_Coronary	19:2236637:CS2	0.951396	0.0241946	0.027659	0.17404	0.0356009	0.000912868	rs2074860
Abdominal Aortic Aneurysm	AMH	Artery_Tibial	19:2236637:CS2	0.951396	0.0241946	0.0158406	0.0628864	0.0356009	0.000912868	rs2074860
Abdominal Aortic Aneurysm	AMH	Brain_Cerebellum	19:2236637:CS2	0.951396	0.0241946	0.0327507	0.154774	0.0356009	0.000912868	rs2074860
Abdominal Aortic Aneurysm	AMH	Colon_Sigmoid	19:2236637:CS2	0.951396	0.0241946	0.0191943	0.103253	0.0356009	0.000912868	rs2074860
Abdominal Aortic Aneurysm	AMH	Colon_Transverse	19:2236637:CS2	0.951396	0.0241946	0.018279	0.0985649	0.0356009	0.000912868	rs2074860
Abdominal Aortic Aneurysm	AMH	Brain_Cortex	19:2236637:CS2	0.951396	0.0241946	0.0265342	0.125373	0.0356009	0.000912868	rs2074860
Abdominal Aortic Aneurysm	AMH	Esophagus_Junction	19:2236637:CS2	0.951396	0.0241946	0.0190008	0.0935551	0.0356009	0.000912868	rs2074860
Abdominal Aortic Aneurysm	AMH	Esophagus_Muscularis	19:2236637:CS2	0.951396	0.0241946	0.0160944	0.0913841	0.0356009	0.000912868	rs2074860
Abdominal Aortic Aneurysm	AMH	Fibroblasts	19:2236637:CS2	0.951396	0.0241946	0.01024	0.0555145	0.0241876	0.000576043	rs139377242~rs2074860
Abdominal Aortic Aneurysm	AMH	Heart_Atrial_Appendage	19:2236637:CS2	0.951396	0.0241946	0.0221353	0.0977942	0.0356009	0.000912868	rs2074860
Abdominal Aortic Aneurysm	AMH	Heart_Left_Ventricle	19:2236637:CS2	0.951396	0.0241946	0.0221913	0.14723	0.0356009	0.000912868	rs2074860
Abdominal Aortic Aneurysm	AMH	Liver	19:2236637:CS2	0.951396	0.0241946	0.0858272	0.311121	0.0613086	0.00149418	rs8113528~rs2074860
Abdominal Aortic Aneurysm	AMH	Lung	19:2236637:CS2	0.951396	0.0241946	0.0163653	0.0977409	0.0356009	0.000912868	rs2074860
Abdominal Aortic Aneurysm	AMH	Nerve_Tibial	19:2236637:CS2	0.951396	0.0241946	0.0154088	0.069585	0.0356009	0.000912868	rs2074860
Abdominal Aortic Aneurysm	AMH	Pancreas	19:2236637:CS2	0.951396	0.0241946	0.0261763	0.167455	0.0356009	0.000912868	rs2074860
Abdominal Aortic Aneurysm	AMH	Pituitary	19:2236637:CS2	0.951396	0.0241946	0.0251589	0.14064	0.0356009	0.000912868	rs2074860
Abdominal Aortic Aneurysm	AMH	Small_Intestine	19:2236637:CS2	0.951396	0.0241946	0.0171873	0.126104	0.0214857	0.000509157	rs2074860~rs216284
Abdominal Aortic Aneurysm	AMH	Spleen	19:2236637:CS2	0.951396	0.0241946	0.024595	0.138824	0.0356009	0.000912868	rs2074860
Abdominal Aortic Aneurysm	AMH	Stomach	19:2236637:CS2	0.951396	0.0241946	0.0214759	0.123765	0.0356009	0.000912868	rs2074860
Abdominal Aortic Aneurysm	AMH	Thyroid	19:2236637:CS2	0.951396	0.0241946	0.0149792	0.0581098	0.0356009	0.000912868	rs2074860
Abdominal Aortic Aneurysm	AMH	Whole_Blood	19:2236637:CS2	0.951396	0.0241946	0.0165154	0.0978194	0.0356009	0.000912868	rs2074860
Abdominal Aortic Aneurysm	SF3A2	Brain_Cerebellum	19:2236637:CS2	0.951396	0.0241946	0.0930618	0.580632	0.0356009	0.000912868	rs2074860
Abdominal Aortic Aneurysm	LDLR	Fibroblasts	19:11189764:CS2	0.998937	0.0239401	-0.264064	0.645904	0.162386	0.00381612	rs73013176~rs72658867
Abdominal Aortic Aneurysm	LDLR	Thyroid	19:11189764:CS2	0.998937	0.0239401	-0.796504	1.75836	0.167082	0.00392574	rs72658867
Abdominal Aortic Aneurysm	LDLR	Whole_Blood	19:11189764:CS2	0.998937	0.0239401	-0.385468	0.549409	0.335304	0.0083467	rs73013176~rs72658867
Abdominal Aortic Aneurysm	ZNF441	Nerve_Tibial	19:11189764:CS2	0.998937	0.0239401	0.920197	2.19709	0.167082	0.00392574	rs72658867
Abdominal Aortic Aneurysm	chr19:12034592:12035554:clu_25560:ENSG00000219665.8	Lung	19:11189764:CS2	0.998937	0.0239401	-0.47998	1.12209	0.167082	0.00392574	rs72658867
Abdominal Aortic Aneurysm	chr19:40610657:40611152:clu_22416:ENSG00000090006.17	Muscle_Skeletal	19:41117300:CS1	0.999997	0.0714007	0.640592	1.72019	0.142857	0.0102001	rs112009052
Abdominal Aortic Aneurysm	chr19:40610657:40611859:clu_19861:ENSG00000090006.17	Adrenal_Gland	19:41117300:CS1	0.999997	0.0714007	-0.150675	0.341254	0.142857	0.0102001	rs112009052
Abdominal Aortic Aneurysm	chr19:40610657:40611859:clu_20398:ENSG00000090006.17	Fibroblasts	19:41117300:CS1	0.999997	0.0714007	-0.1084	0.254721	0.142857	0.0102001	rs112009052
Abdominal Aortic Aneurysm	chr19:40611394:40611859:clu_19544:ENSG00000090006.17	Pancreas	19:41117300:CS1	0.999997	0.0714007	0.241909	0.572586	0.142857	0.0102001	rs112009052
Abdominal Aortic Aneurysm	chr19:40611394:40611859:clu_20309:ENSG00000090006.17	Whole_Blood	19:41117300:CS1	0.999997	0.0714007	0.245774	0.613326	0.142857	0.0102001	rs112009052
Abdominal Aortic Aneurysm	chr19:40611394:40611859:clu_20398:ENSG00000090006.17	Fibroblasts	19:41117300:CS1	0.999997	0.0714007	0.164715	0.421411	0.142857	0.0102001	rs112009052
Abdominal Aortic Aneurysm	chr19:40611394:40611859:clu_22416:ENSG00000090006.17	Muscle_Skeletal	19:41117300:CS1	0.999997	0.0714007	0.134641	0.345327	0.142857	0.0102001	rs112009052
Abdominal Aortic Aneurysm	TOMM40	Muscle_Skeletal	19:45411941:CS1	1	0.0769068	-0.97998	1.71679	0.250001	0.0192267	rs184017
Abdominal Aortic Aneurysm	chr19:44891689:44892393:clu_22230:ENSG00000130204.12	Brain_Cerebellum	19:45411941:CS1	1	0.0769068	0.529881	0.908515	0.250001	0.0192267	rs184017
Abdominal Aortic Aneurysm	chr19:44892460:44892837:clu_22230:ENSG00000130204.12	Brain_Cerebellum	19:45411941:CS1	1	0.0769068	-0.550532	0.994351	0.250001	0.0192267	rs184017
Abdominal Aortic Aneurysm	chr19:45616853:45617630:clu_19818:ENSG00000125746.16	Pancreas	19:45411941:CS1	1	0.0769068	2.23064	3.91306	0.250001	0.0192267	rs184017
Abdominal Aortic Aneurysm	chr19:45398339:45404999:clu_26370:ENSG00000104881.15	Nerve_Tibial	19:45411941:CS2	0.99894	0.0113938	-0.914102	0.947682	0.49947	0.00569691	rs7254892
Abdominal Aortic Aneurysm	chr19:45398339:45406292:clu_26370:ENSG00000104881.15	Nerve_Tibial	19:45411941:CS2	0.99894	0.0113938	2.18615	2.31864	0.49947	0.00569691	rs7254892
Abdominal Aortic Aneurysm	FKRP	Kidney_Tube	19:47182942:CS1	0.993788	0.0506007	0.086465	0.254853	0.0993788	0.00506007	rs137882482
Abdominal Aortic Aneurysm	FKRP	Lymphocytes	19:47182942:CS1	0.993788	0.0506007	0.240714	0.742956	0.0993788	0.00506007	rs137882482
Abdominal Aortic Aneurysm	PRKD2	Adipose_Visceral	19:47182942:CS1	0.993788	0.0506007	0.322486	1.01395	0.0993788	0.00506007	rs137882482
Abdominal Aortic Aneurysm	PRKD2	Colon_Sigmoid	19:47182942:CS1	0.993788	0.0506007	0.139075	0.427267	0.0993788	0.00506007	rs137882482
Abdominal Aortic Aneurysm	PRKD2	Colon_Transverse	19:47182942:CS1	0.993788	0.0506007	0.234969	0.701188	0.0993788	0.00506007	rs137882482
Abdominal Aortic Aneurysm	PRKD2	Kidney_Tube	19:47182942:CS1	0.993788	0.0506007	0.452417	1.4612	0.0993788	0.00506007	rs137882482
Abdominal Aortic Aneurysm	PRKD2	Liver	19:47182942:CS1	0.993788	0.0506007	0.385814	1.17372	0.0993788	0.00506007	rs137882482
Abdominal Aortic Aneurysm	PRKD2	Stomach	19:47182942:CS1	0.993788	0.0506007	0.315179	0.9747	0.0993788	0.00506007	rs137882482
Abdominal Aortic Aneurysm	chr19:46746090:46748027:clu_22796:ENSG00000181027.10	Muscle_Skeletal	19:47182942:CS1	0.993788	0.0506007	0.758076	2.21798	0.0993788	0.00506007	rs137882482
Abdominal Aortic Aneurysm	chr19:46746090:46748027:clu_27549:ENSG00000181027.10	Thyroid	19:47182942:CS1	0.993788	0.0506007	0.214442	0.616192	0.0993788	0.00506007	rs137882482
Abdominal Aortic Aneurysm	NEURL2	Muscle_Skeletal	20:44586023:CS1	1	0.187594	1.05551	1.9537	0.2	0.0375187	rs58749629
Abdominal Aortic Aneurysm	NEURL2	Spleen	20:44586023:CS1	1	0.187594	0.609664	1.2537	0.2	0.0375187	rs58749629
Abdominal Aortic Aneurysm	PLTP	Spleen	20:44586023:CS1	1	0.187594	0.527959	1.08053	0.2	0.0375187	rs58749629
Abdominal Aortic Aneurysm	chr20:45406135:45408460:clu_26452:ENSG00000204070.9	Stomach	20:44586023:CS1	1	0.187594	-2.25541	4.62656	0.2	0.0375187	rs58749629
Abdominal Aortic Aneurysm	chr20:45406135:45408460:clu_26452:ENSG00000244274.7	Stomach	20:44586023:CS1	1	0.187594	-2.28323	4.55778	0.2	0.0375187	rs58749629
Abdominal Aortic Aneurysm	PLTP	Nerve_Tibial	20:44586023:CS2	0.995707	0.0792942	0.95341	0.125763	0.995707	0.0792942	rs2868346~rs45521633
Abdominal Aortic Aneurysm	PREX1	Artery_Aorta	20:47261017:CS1	0.999836	0.132416	0.70773	0.489109	0.688994	0.0916989	rs6066800~rs144582521
Abdominal Aortic Aneurysm	chr21:39511809:39515088:clu_29732:ENSG00000185437.13	Pituitary	21:39819830:CS1	1	0.134598	8.95494	1.05762	1	0.134598	rs2836411
Abdominal Aortic Aneurysm	ERG	Artery_Tibial	21:39819830:CS2	1.00818	0.0800398	-1.13706	1.17407	0.50409	0.0400199	rs117870289
Abdominal Aortic Aneurysm	chr21:39475215:39499823:clu_32878:ENSG00000185437.13	Lung	21:39819830:CS2	1.00818	0.0800398	-4.76925	4.888	0.50409	0.0400199	rs117870289
Abdominal Aortic Aneurysm	CCDC157	Spleen	22:30764664:CS1	0.959194	0.0523287	-0.104265	0.618362	0.0239717	0.00127906	rs59731356
Abdominal Aortic Aneurysm	CCDC157	Stomach	22:30764664:CS1	0.959194	0.0523287	-0.120151	0.511762	0.0239717	0.00127906	rs59731356
Abdominal Aortic Aneurysm	RNF215	Adipose_Visceral	22:30764664:CS1	0.959194	0.0523287	-0.0952703	0.663173	0.0239717	0.00127906	rs59731356
Abdominal Aortic Aneurysm	RNF215	Fibroblasts	22:30764664:CS1	0.959194	0.0523287	-0.143587	0.404208	0.0880062	0.00487721	rs59731356~rs28360657
Abdominal Aortic Aneurysm	RNF215	Nerve_Tibial	22:30764664:CS1	0.959194	0.0523287	-0.0593914	0.286268	0.0239717	0.00127906	rs59731356
Abdominal Aortic Aneurysm	SEC14L2	Brain_Cerebellum	22:30764664:CS1	0.959194	0.0523287	0.22645	1.42462	0.0239717	0.00127906	rs59731356
Abdominal Aortic Aneurysm	chr22:30287560:30289385:clu_23037:ENSG00000099992.15	Artery_Coronary	22:30764664:CS1	0.959194	0.0523287	0.19751	0.717567	0.0643719	0.00350318	rs59731356~rs28360657
Abdominal Aortic Aneurysm	chr22:30287560:30289385:clu_23037:ENSG00000239282.7	Artery_Coronary	22:30764664:CS1	0.959194	0.0523287	0.196637	0.832788	0.0646055	0.00351649	rs59731356~rs28360657
Abdominal Aortic Aneurysm	chr22:30287560:30289385:clu_24469:ENSG00000099992.15	Esophagus_Junction	22:30764664:CS1	0.959194	0.0523287	0.141097	0.430329	0.0827657	0.00456048	rs59731356~rs28360657
Abdominal Aortic Aneurysm	chr22:30287560:30289385:clu_24469:ENSG00000239282.7	Esophagus_Junction	22:30764664:CS1	0.959194	0.0523287	0.141075	0.485468	0.0830052	0.00457443	rs59731356~rs28360657
Abdominal Aortic Aneurysm	chr22:30287560:30289385:clu_26917:ENSG00000099992.15	Pituitary	22:30764664:CS1	0.959194	0.0523287	0.105531	0.79103	0.0239717	0.00127906	rs59731356
Abdominal Aortic Aneurysm	chr22:30287560:30289385:clu_26917:ENSG00000239282.7	Pituitary	22:30764664:CS1	0.959194	0.0523287	0.104776	0.598501	0.0239717	0.00127906	rs59731356
Abdominal Aortic Aneurysm	chr22:30287560:30289385:clu_27170:ENSG00000099992.15	Colon_Transverse	22:30764664:CS1	0.959194	0.0523287	0.135156	0.455119	0.0882579	0.0048905	rs59731356~rs28360657
Abdominal Aortic Aneurysm	chr22:30287560:30289385:clu_27170:ENSG00000239282.7	Colon_Transverse	22:30764664:CS1	0.959194	0.0523287	0.134529	0.441249	0.088184	0.00488664	rs59731356~rs28360657
Abdominal Aortic Aneurysm	chr22:30287560:30289385:clu_28994:ENSG00000099992.15	Nerve_Tibial	22:30764664:CS1	0.959194	0.0523287	0.0281464	0.215783	0.0239717	0.00127906	rs59731356
Abdominal Aortic Aneurysm	chr22:30287560:30289385:clu_28994:ENSG00000239282.7	Nerve_Tibial	22:30764664:CS1	0.959194	0.0523287	0.0279991	0.168347	0.0239717	0.00127906	rs59731356
Abdominal Aortic Aneurysm	chr22:30366248:30368560:clu_30219:ENSG00000187860.10	Thyroid	22:30764664:CS1	0.959194	0.0523287	-0.0390937	0.313906	0.0239717	0.00127906	rs59731356
Abdominal Aortic Aneurysm	chr22:30375663:30376259:clu_24685:ENSG00000187860.10	Heart_Atrial_Appendage	22:30764664:CS1	0.959194	0.0523287	0.055454	0.357136	0.0239717	0.00127906	rs59731356
Abdominal Aortic Aneurysm	chr22:30379813:30380062:clu_24481:ENSG00000099999.14	Esophagus_Junction	22:30764664:CS1	0.959194	0.0523287	-0.0493377	0.386705	0.0239717	0.00127906	rs59731356
Abdominal Aortic Aneurysm	chr22:30379813:30380062:clu_25139:ENSG00000099999.14	Colon_Sigmoid	22:30764664:CS1	0.959194	0.0523287	-0.0464426	0.291893	0.0239717	0.00127906	rs59731356
Abdominal Aortic Aneurysm	chr22:30379813:30380062:clu_29007:ENSG00000099999.14	Nerve_Tibial	22:30764664:CS1	0.959194	0.0523287	-0.161591	0.566912	0.0883661	0.00489191	rs59731356~rs28360657
Abdominal Aortic Aneurysm	CCDC157	Islets	22:30764664:CS2	0.999575	0.0225928	0.425114	0.0851155	0.999575	0.0225928	rs1860217~rs4823085~rs2074733
Abdominal Aortic Aneurysm	ENSG00000279699	Adipose_Visceral	22:30764664:CS3	0.957073	0.0199716	0.888083	2.04242	0.163385	0.0035004	rs3747147
Abdominal Aortic Aneurysm	GAS2L1	Fibroblasts	22:30764664:CS3	0.957073	0.0199716	-0.13531	0.228107	0.233458	0.00473519	rs13055676
Abdominal Aortic Aneurysm	chr22:29260613:29260702:clu_28931:ENSG00000100263.13	Nerve_Tibial	22:30764664:CS3	0.957073	0.0199716	-0.888796	1.72259	0.233458	0.00473519	rs13055676
Abdominal Aortic Aneurysm	chr22:30244061:30244755:clu_29826:ENSG00000128342.4	Lung	22:30764664:CS3	0.957073	0.0199716	0.189496	0.450945	0.163385	0.0035004	rs3747147
Abdominal Aortic Aneurysm	chr22:30244933:30246677:clu_29826:ENSG00000128342.4	Lung	22:30764664:CS3	0.957073	0.0199716	-0.496232	1.22816	0.163385	0.0035004	rs3747147
Alanine Aminotransferase	ARHGEF19	Thyroid	1:16505320:CS1	0.989057	0.131044	0.566388	0.693881	0.410999	0.0544994	rs10907286
Alanine Aminotransferase	CPLANE2	Lung	1:16505320:CS1	0.989057	0.131044	-0.286898	0.677342	0.16706	0.0220455	rs10907286~rs75218693
Alanine Aminotransferase	CPLANE2	Spleen	1:16505320:CS1	0.989057	0.131044	-3.11387	3.68475	0.410999	0.0544994	rs10907286
Alanine Aminotransferase	CPLANE2	Adipose_Subcutaneous	1:16505320:CS2	0.954923	0.104783	-0.0399858	0.215206	0.0434056	0.00476285	rs6603850
Alanine Aminotransferase	CPLANE2	Adipose_Visceral	1:16505320:CS2	0.954923	0.104783	-0.0465209	0.217598	0.0434056	0.00476285	rs6603850
Alanine Aminotransferase	CPLANE2	Artery_Aorta	1:16505320:CS2	0.954923	0.104783	-0.0492235	0.235816	0.0434056	0.00476285	rs6603850
Alanine Aminotransferase	CPLANE2	Artery_Coronary	1:16505320:CS2	0.954923	0.104783	-0.0962509	0.5628	0.0434056	0.00476285	rs6603850
Alanine Aminotransferase	CPLANE2	Artery_Tibial	1:16505320:CS2	0.954923	0.104783	-0.036233	0.192883	0.0434056	0.00476285	rs6603850
Alanine Aminotransferase	CPLANE2	Colon_Sigmoid	1:16505320:CS2	0.954923	0.104783	-0.0572201	0.25864	0.0434056	0.00476285	rs6603850
Alanine Aminotransferase	CPLANE2	Brain_Cortex	1:16505320:CS2	0.954923	0.104783	-0.0692126	0.32669	0.0434056	0.00476285	rs6603850
Alanine Aminotransferase	CPLANE2	Esophagus_Muscularis	1:16505320:CS2	0.954923	0.104783	-0.0436304	0.185756	0.0434056	0.00476285	rs6603850
Alanine Aminotransferase	CPLANE2	Fibroblasts	1:16505320:CS2	0.954923	0.104783	-0.0376746	0.152804	0.0434056	0.00476285	rs6603850
Alanine Aminotransferase	CPLANE2	Heart_Atrial_Appendage	1:16505320:CS2	0.954923	0.104783	-0.0511397	0.282692	0.0434056	0.00476285	rs6603850
Alanine Aminotransferase	CPLANE2	Heart_Left_Ventricle	1:16505320:CS2	0.954923	0.104783	-0.0517029	0.258264	0.0434056	0.00476285	rs6603850
Alanine Aminotransferase	CPLANE2	Kidney_Glom	1:16505320:CS2	0.954923	0.104783	-0.195869	0.940727	0.0434056	0.00476285	rs6603850
Alanine Aminotransferase	CPLANE2	Liver	1:16505320:CS2	0.954923	0.104783	-0.0581469	0.279064	0.0434056	0.00476285	rs6603850
Alanine Aminotransferase	CPLANE2	Muscle_Skeletal	1:16505320:CS2	0.954923	0.104783	-0.0353514	0.177767	0.0434056	0.00476285	rs6603850
Alanine Aminotransferase	CPLANE2	Nerve_Tibial	1:16505320:CS2	0.954923	0.104783	-0.0415385	0.175904	0.0434056	0.00476285	rs6603850
Alanine Aminotransferase	CPLANE2	Pancreas	1:16505320:CS2	0.954923	0.104783	-0.0592262	0.283973	0.0434056	0.00476285	rs6603850
Alanine Aminotransferase	CPLANE2	Small_Intestine	1:16505320:CS2	0.954923	0.104783	-0.228346	0.972039	0.0434056	0.00476285	rs6603850
Alanine Aminotransferase	CPLANE2	Stomach	1:16505320:CS2	0.954923	0.104783	-0.0526359	0.188129	0.0434056	0.00476285	rs6603850
Alanine Aminotransferase	CPLANE2	Thyroid	1:16505320:CS2	0.954923	0.104783	-0.042658	0.167454	0.0434056	0.00476285	rs6603850
Alanine Aminotransferase	CPLANE2	Whole_Blood	1:16505320:CS2	0.954923	0.104783	-0.0514474	0.276866	0.0434056	0.00476285	rs6603850
Alanine Aminotransferase	ENSG00000204377	Kidney_Tube	1:16505320:CS2	0.954923	0.104783	-0.0659861	0.297486	0.0434056	0.00476285	rs6603850
Alanine Aminotransferase	EPHA2	Thyroid	1:16505320:CS2	0.954923	0.104783	0.115455	0.521763	0.0434056	0.00476285	rs6603850
Alanine Aminotransferase	ENSG00000224183	Adipose_Subcutaneous	1:25713333:CS1	0.952403	0.0641658	0.00249993	0.0425364	0.00491225	0.000326758	rs55794721
Alanine Aminotransferase	ENSG00000224183	Adipose_Visceral	1:25713333:CS1	0.952403	0.0641658	0.00274531	0	0.00491225	0.000326758	rs55794721
Alanine Aminotransferase	ENSG00000224183	Adrenal_Gland	1:25713333:CS1	0.952403	0.0641658	0.0039165	0	0.00491225	0.000326758	rs55794721
Alanine Aminotransferase	ENSG00000224183	Artery_Aorta	1:25713333:CS1	0.952403	0.0641658	0.00302938	0.0457139	0.00491225	0.000326758	rs55794721
Alanine Aminotransferase	ENSG00000224183	Artery_Coronary	1:25713333:CS1	0.952403	0.0641658	0.00415776	0.0719177	0.00491225	0.000326758	rs55794721
Alanine Aminotransferase	ENSG00000224183	Artery_Tibial	1:25713333:CS1	0.952403	0.0641658	0.0025264	0	0.00491225	0.000326758	rs55794721
Alanine Aminotransferase	ENSG00000224183	Brain_Cerebellum	1:25713333:CS1	0.952403	0.0641658	0.00446106	0.0654488	0.00491225	0.000326758	rs55794721
Alanine Aminotransferase	ENSG00000224183	Colon_Sigmoid	1:25713333:CS1	0.952403	0.0641658	0.00336575	0.046421	0.00491225	0.000326758	rs55794721
Alanine Aminotransferase	ENSG00000224183	Colon_Transverse	1:25713333:CS1	0.952403	0.0641658	0.00350038	0.0591673	0.00491225	0.000326758	rs55794721
Alanine Aminotransferase	ENSG00000224183	Brain_Cortex	1:25713333:CS1	0.952403	0.0641658	0.00431881	0.0533752	0.00491225	0.000326758	rs55794721
Alanine Aminotransferase	ENSG00000224183	Esophagus_Junction	1:25713333:CS1	0.952403	0.0641658	0.00347054	0.0593017	0.00491225	0.000326758	rs55794721
Alanine Aminotransferase	ENSG00000224183	Esophagus_Mucosa	1:25713333:CS1	0.952403	0.0641658	0.00304307	0.0493911	0.00491225	0.000326758	rs55794721
Alanine Aminotransferase	ENSG00000224183	Esophagus_Muscularis	1:25713333:CS1	0.952403	0.0641658	0.00293149	0.0487107	0.00491225	0.000326758	rs55794721
Alanine Aminotransferase	ENSG00000224183	Fibroblasts	1:25713333:CS1	0.952403	0.0641658	0.00263449	0.0336293	0.00491225	0.000326758	rs55794721
Alanine Aminotransferase	ENSG00000224183	Heart_Atrial_Appendage	1:25713333:CS1	0.952403	0.0641658	0.00316034	0	0.00491225	0.000326758	rs55794721
Alanine Aminotransferase	ENSG00000224183	Heart_Left_Ventricle	1:25713333:CS1	0.952403	0.0641658	0.00440453	0.0676336	0.00491225	0.000326758	rs55794721
Alanine Aminotransferase	ENSG00000224183	Kidney_Glom	1:25713333:CS1	0.952403	0.0641658	0.00320111	0	0.00491225	0.000326758	rs55794721
Alanine Aminotransferase	ENSG00000224183	Kidney_Tube	1:25713333:CS1	0.952403	0.0641658	0.00450897	0.0845081	0.00491225	0.000326758	rs55794721
Alanine Aminotransferase	ENSG00000224183	Liver	1:25713333:CS1	0.952403	0.0641658	0.00531418	0	0.00491225	0.000326758	rs55794721
Alanine Aminotransferase	ENSG00000224183	Lung	1:25713333:CS1	0.952403	0.0641658	0.00262423	0	0.00491225	0.000326758	rs55794721
Alanine Aminotransferase	ENSG00000224183	Lymphocytes	1:25713333:CS1	0.952403	0.0641658	0.0059051	0.0887731	0.00491225	0.000326758	rs55794721
Alanine Aminotransferase	ENSG00000224183	Muscle_Skeletal	1:25713333:CS1	0.952403	0.0641658	0.00315439	0.0591031	0.00491225	0.000326758	rs55794721
Alanine Aminotransferase	ENSG00000224183	Nerve_Tibial	1:25713333:CS1	0.952403	0.0641658	0.00263291	0	0.00491225	0.000326758	rs55794721
Alanine Aminotransferase	ENSG00000224183	Pituitary	1:25713333:CS1	0.952403	0.0641658	0.00386166	0.0590816	0.00491225	0.000326758	rs55794721
Alanine Aminotransferase	ENSG00000224183	Small_Intestine	1:25713333:CS1	0.952403	0.0641658	0.00482354	0.0952589	0.00491225	0.000326758	rs55794721
Alanine Aminotransferase	ENSG00000224183	Spleen	1:25713333:CS1	0.952403	0.0641658	0.00419756	0.073483	0.00491225	0.000326758	rs55794721
Alanine Aminotransferase	ENSG00000224183	Stomach	1:25713333:CS1	0.952403	0.0641658	0.0037253	0.0634101	0.00491225	0.000326758	rs55794721
Alanine Aminotransferase	ENSG00000224183	Thyroid	1:25713333:CS1	0.952403	0.0641658	0.00243469	0	0.00491225	0.000326758	rs55794721
Alanine Aminotransferase	ENSG00000224183	Whole_Blood	1:25713333:CS1	0.952403	0.0641658	0.00239922	0	0.00491225	0.000326758	rs55794721
Alanine Aminotransferase	ENSG00000238084	Kidney_Glom	1:25713333:CS1	0.952403	0.0641658	0.0275908	0.278179	0.00491225	0.000326758	rs55794721
Alanine Aminotransferase	ENSG00000259984	Islets	1:25713333:CS1	0.952403	0.0641658	0.0269022	0.457404	0.00491225	0.000326758	rs55794721
Alanine Aminotransferase	ENSG00000261349	Adipose_Visceral	1:25713333:CS1	0.952403	0.0641658	0.00285404	0.0465326	0.00491225	0.000326758	rs55794721
Alanine Aminotransferase	ENSG00000261349	Adrenal_Gland	1:25713333:CS1	0.952403	0.0641658	0.00414904	0	0.00491225	0.000326758	rs55794721
Alanine Aminotransferase	ENSG00000261349	Artery_Aorta	1:25713333:CS1	0.952403	0.0641658	0.00308312	0.0482034	0.00491225	0.000326758	rs55794721
Alanine Aminotransferase	ENSG00000261349	Artery_Coronary	1:25713333:CS1	0.952403	0.0641658	0.00423006	0	0.00491225	0.000326758	rs55794721
Alanine Aminotransferase	ENSG00000261349	Brain_Cerebellum	1:25713333:CS1	0.952403	0.0641658	0.00384034	0	0.00491225	0.000326758	rs55794721
Alanine Aminotransferase	ENSG00000261349	Colon_Sigmoid	1:25713333:CS1	0.952403	0.0641658	0.00330717	0	0.00491225	0.000326758	rs55794721
Alanine Aminotransferase	ENSG00000261349	Brain_Cortex	1:25713333:CS1	0.952403	0.0641658	0.0043442	0.0540401	0.00491225	0.000326758	rs55794721
Alanine Aminotransferase	ENSG00000261349	Esophagus_Junction	1:25713333:CS1	0.952403	0.0641658	0.00340178	0.0725483	0.00491225	0.000326758	rs55794721
Alanine Aminotransferase	ENSG00000261349	Esophagus_Mucosa	1:25713333:CS1	0.952403	0.0641658	0.00662275	0.0520604	0.0117387	0.000850886	rs55794721~rs28651843~rs78280108
Alanine Aminotransferase	ENSG00000261349	Fibroblasts	1:25713333:CS1	0.952403	0.0641658	0.00727926	0.0705546	0.0126075	0.000916951	rs55794721~rs78280108
Alanine Aminotransferase	ENSG00000261349	Heart_Atrial_Appendage	1:25713333:CS1	0.952403	0.0641658	0.00301596	0	0.00491225	0.000326758	rs55794721
Alanine Aminotransferase	ENSG00000261349	Heart_Left_Ventricle	1:25713333:CS1	0.952403	0.0641658	0.0133514	0.0983522	0.0212446	0.00167067	rs55794721~rs78280108
Alanine Aminotransferase	ENSG00000261349	Kidney_Glom	1:25713333:CS1	0.952403	0.0641658	0.00640537	0.105342	0.00491225	0.000326758	rs55794721
Alanine Aminotransferase	ENSG00000261349	Kidney_Tube	1:25713333:CS1	0.952403	0.0641658	0.00417176	0.118699	0.00491225	0.000326758	rs55794721
Alanine Aminotransferase	ENSG00000261349	Liver	1:25713333:CS1	0.952403	0.0641658	0.00450699	0.0876242	0.00491225	0.000326758	rs55794721
Alanine Aminotransferase	ENSG00000261349	Lung	1:25713333:CS1	0.952403	0.0641658	0.0025318	0	0.00491225	0.000326758	rs55794721
Alanine Aminotransferase	ENSG00000261349	Lymphocytes	1:25713333:CS1	0.952403	0.0641658	0.00516866	0.0758553	0.00491225	0.000326758	rs55794721
Alanine Aminotransferase	ENSG00000261349	Muscle_Skeletal	1:25713333:CS1	0.952403	0.0641658	0.00236737	0.0294947	0.00491225	0.000326758	rs55794721
Alanine Aminotransferase	ENSG00000261349	Pancreas	1:25713333:CS1	0.952403	0.0641658	0.00346131	0.0591205	0.00491225	0.000326758	rs55794721
Alanine Aminotransferase	ENSG00000261349	Pituitary	1:25713333:CS1	0.952403	0.0641658	0.00367095	0	0.00491225	0.000326758	rs55794721
Alanine Aminotransferase	ENSG00000261349	Small_Intestine	1:25713333:CS1	0.952403	0.0641658	0.00460692	0.0556731	0.00491225	0.000326758	rs55794721
Alanine Aminotransferase	ENSG00000261349	Spleen	1:25713333:CS1	0.952403	0.0641658	0.00398446	0.0606064	0.00491225	0.000326758	rs55794721
Alanine Aminotransferase	ENSG00000261349	Stomach	1:25713333:CS1	0.952403	0.0641658	0.00809912	0.0662168	0.0113059	0.000817645	rs55794721~rs12034664
Alanine Aminotransferase	ENSG00000272432	Adipose_Subcutaneous	1:25713333:CS1	0.952403	0.0641658	-0.0058091	0.0754147	0.00491225	0.000326758	rs55794721
Alanine Aminotransferase	ENSG00000272432	Adrenal_Gland	1:25713333:CS1	0.952403	0.0641658	-0.00966146	0.128297	0.00491225	0.000326758	rs55794721
Alanine Aminotransferase	ENSG00000272432	Artery_Aorta	1:25713333:CS1	0.952403	0.0641658	-0.00601329	0.125343	0.00491225	0.000326758	rs55794721
Alanine Aminotransferase	ENSG00000272432	Colon_Sigmoid	1:25713333:CS1	0.952403	0.0641658	-0.00766063	0.0949673	0.00491225	0.000326758	rs55794721
Alanine Aminotransferase	ENSG00000272432	Esophagus_Mucosa	1:25713333:CS1	0.952403	0.0641658	-0.00562132	0.0817408	0.00491225	0.000326758	rs55794721
Alanine Aminotransferase	ENSG00000272432	Heart_Left_Ventricle	1:25713333:CS1	0.952403	0.0641658	-0.0118743	0	0.00491225	0.000326758	rs55794721
Alanine Aminotransferase	ENSG00000272432	Thyroid	1:25713333:CS1	0.952403	0.0641658	-0.00414068	0	0.00491225	0.000326758	rs55794721
Alanine Aminotransferase	LDLRAP1	Fibroblasts	1:25713333:CS1	0.952403	0.0641658	0.00711079	0	0.00491225	0.000326758	rs55794721
Alanine Aminotransferase	RHD	Adipose_Subcutaneous	1:25713333:CS1	0.952403	0.0641658	0.00247163	0.0414832	0.00491225	0.000326758	rs55794721
Alanine Aminotransferase	RHD	Adipose_Visceral	1:25713333:CS1	0.952403	0.0641658	0.00266505	0	0.00491225	0.000326758	rs55794721
Alanine Aminotransferase	RHD	Adrenal_Gland	1:25713333:CS1	0.952403	0.0641658	0.00375963	0.0734894	0.00491225	0.000326758	rs55794721
Alanine Aminotransferase	RHD	Artery_Aorta	1:25713333:CS1	0.952403	0.0641658	0.00290954	0.059376	0.00491225	0.000326758	rs55794721
Alanine Aminotransferase	RHD	Artery_Coronary	1:25713333:CS1	0.952403	0.0641658	0.0039615	0.052817	0.00491225	0.000326758	rs55794721
Alanine Aminotransferase	RHD	Artery_Tibial	1:25713333:CS1	0.952403	0.0641658	0.00246082	0.0455286	0.00491225	0.000326758	rs55794721
Alanine Aminotransferase	RHD	Brain_Cerebellum	1:25713333:CS1	0.952403	0.0641658	0.00385957	0.0407282	0.00491225	0.000326758	rs55794721
Alanine Aminotransferase	RHD	Colon_Sigmoid	1:25713333:CS1	0.952403	0.0641658	0.00316572	0	0.00491225	0.000326758	rs55794721
Alanine Aminotransferase	RHD	Colon_Transverse	1:25713333:CS1	0.952403	0.0641658	0.00309766	0.0629957	0.00491225	0.000326758	rs55794721
Alanine Aminotransferase	RHD	Brain_Cortex	1:25713333:CS1	0.952403	0.0641658	0.00391786	0.0379809	0.00491225	0.000326758	rs55794721
Alanine Aminotransferase	RHD	Esophagus_Junction	1:25713333:CS1	0.952403	0.0641658	0.00323607	0.0422331	0.00491225	0.000326758	rs55794721
Alanine Aminotransferase	RHD	Esophagus_Mucosa	1:25713333:CS1	0.952403	0.0641658	0.00260202	0.0306007	0.00491225	0.000326758	rs55794721
Alanine Aminotransferase	RHD	Esophagus_Muscularis	1:25713333:CS1	0.952403	0.0641658	0.00271925	0	0.00491225	0.000326758	rs55794721
Alanine Aminotransferase	RHD	Fibroblasts	1:25713333:CS1	0.952403	0.0641658	0.00260381	0.0469308	0.00491225	0.000326758	rs55794721
Alanine Aminotransferase	RHD	Heart_Atrial_Appendage	1:25713333:CS1	0.952403	0.0641658	0.00292499	0.0411182	0.00491225	0.000326758	rs55794721
Alanine Aminotransferase	RHD	Heart_Left_Ventricle	1:25713333:CS1	0.952403	0.0641658	0.0029548	0.0541712	0.00491225	0.000326758	rs55794721
Alanine Aminotransferase	RHD	Kidney_Glom	1:25713333:CS1	0.952403	0.0641658	0.00277163	0	0.00491225	0.000326758	rs55794721
Alanine Aminotransferase	RHD	Kidney_Tube	1:25713333:CS1	0.952403	0.0641658	0.00266856	0.0446413	0.00491225	0.000326758	rs55794721
Alanine Aminotransferase	RHD	Liver	1:25713333:CS1	0.952403	0.0641658	0.00409311	0.082048	0.00491225	0.000326758	rs55794721
Alanine Aminotransferase	RHD	Lymphocytes	1:25713333:CS1	0.952403	0.0641658	0.00521114	0.0822503	0.00491225	0.000326758	rs55794721
Alanine Aminotransferase	RHD	Muscle_Skeletal	1:25713333:CS1	0.952403	0.0641658	0.00223956	0.0293243	0.00491225	0.000326758	rs55794721
Alanine Aminotransferase	RHD	Nerve_Tibial	1:25713333:CS1	0.952403	0.0641658	0.00254098	0.0489506	0.00491225	0.000326758	rs55794721
Alanine Aminotransferase	RHD	Pancreas	1:25713333:CS1	0.952403	0.0641658	0.00340998	0.0667154	0.00491225	0.000326758	rs55794721
Alanine Aminotransferase	RHD	Pituitary	1:25713333:CS1	0.952403	0.0641658	0.003535	0.0754364	0.00491225	0.000326758	rs55794721
Alanine Aminotransferase	RHD	Small_Intestine	1:25713333:CS1	0.952403	0.0641658	0.00440793	0.064849	0.00491225	0.000326758	rs55794721
Alanine Aminotransferase	RHD	Spleen	1:25713333:CS1	0.952403	0.0641658	0.00383777	0.085198	0.00491225	0.000326758	rs55794721
Alanine Aminotransferase	RHD	Stomach	1:25713333:CS1	0.952403	0.0641658	0.00329055	0.0504931	0.00491225	0.000326758	rs55794721
Alanine Aminotransferase	RHD	Thyroid	1:25713333:CS1	0.952403	0.0641658	0.00447126	0.028192	0.0116317	0.000832397	rs9438866~rs11249250
Alanine Aminotransferase	RHD	Whole_Blood	1:25713333:CS1	0.952403	0.0641658	0.00233396	0.024729	0.00491225	0.000326758	rs55794721
Alanine Aminotransferase	RSRP1	Fibroblasts	1:25713333:CS1	0.952403	0.0641658	0.00403152	0.0653579	0.00491225	0.000326758	rs55794721
Alanine Aminotransferase	RSRP1	Whole_Blood	1:25713333:CS1	0.952403	0.0641658	0.0240275	0.343989	0.00491225	0.000326758	rs55794721
Alanine Aminotransferase	TMEM50A	Adrenal_Gland	1:25713333:CS1	0.952403	0.0641658	0.00635232	0	0.00491225	0.000326758	rs55794721
Alanine Aminotransferase	TMEM50A	Artery_Aorta	1:25713333:CS1	0.952403	0.0641658	-0.00419583	0.0591382	0.00491225	0.000326758	rs55794721
Alanine Aminotransferase	TMEM50A	Esophagus_Muscularis	1:25713333:CS1	0.952403	0.0641658	-0.00468693	0.0600929	0.00491225	0.000326758	rs55794721
Alanine Aminotransferase	TMEM50A	Fibroblasts	1:25713333:CS1	0.952403	0.0641658	0.00266587	0.0415918	0.00491225	0.000326758	rs55794721
Alanine Aminotransferase	TMEM50A	Heart_Atrial_Appendage	1:25713333:CS1	0.952403	0.0641658	0.00346442	0.0540265	0.00491225	0.000326758	rs55794721
Alanine Aminotransferase	TMEM50A	Kidney_Tube	1:25713333:CS1	0.952403	0.0641658	-0.0142477	0.182211	0.00491225	0.000326758	rs55794721
Alanine Aminotransferase	chr1:25247029:25247309:clu_39337:ENSG00000117616.17	Pancreas	1:25713333:CS1	0.952403	0.0641658	-0.00494093	0.0678387	0.00491225	0.000326758	rs55794721
Alanine Aminotransferase	chr1:25247029:25247309:clu_40405:ENSG00000117616.17	Heart_Left_Ventricle	1:25713333:CS1	0.952403	0.0641658	-0.0200529	0.282175	0.00491225	0.000326758	rs55794721
Alanine Aminotransferase	chr1:25247029:25247309:clu_40750:ENSG00000117616.17	Whole_Blood	1:25713333:CS1	0.952403	0.0641658	-0.00243797	0	0.00491225	0.000326758	rs55794721
Alanine Aminotransferase	chr1:25247029:25247309:clu_41837:ENSG00000117616.17	Fibroblasts	1:25713333:CS1	0.952403	0.0641658	-0.00272019	0.0506397	0.00491225	0.000326758	rs55794721
Alanine Aminotransferase	chr1:25247029:25247309:clu_42715:ENSG00000117616.17	Spleen	1:25713333:CS1	0.952403	0.0641658	-0.00450049	0.0654256	0.00491225	0.000326758	rs55794721
Alanine Aminotransferase	chr1:25247029:25247309:clu_45307:ENSG00000117616.17	Heart_Atrial_Appendage	1:25713333:CS1	0.952403	0.0641658	-0.00365791	0.0480226	0.00491225	0.000326758	rs55794721
Alanine Aminotransferase	chr1:25247029:25247309:clu_45984:ENSG00000117616.17	Muscle_Skeletal	1:25713333:CS1	0.952403	0.0641658	-0.00495768	0.130103	0.00491225	0.000326758	rs55794721
Alanine Aminotransferase	chr1:25247029:25247309:clu_47185:ENSG00000117616.17	Esophagus_Muscularis	1:25713333:CS1	0.952403	0.0641658	-0.0053389	0	0.00491225	0.000326758	rs55794721
Alanine Aminotransferase	chr1:25247029:25247309:clu_50453:ENSG00000117616.17	Adipose_Visceral	1:25713333:CS1	0.952403	0.0641658	-0.00374596	0.078103	0.00491225	0.000326758	rs55794721
Alanine Aminotransferase	chr1:25247029:25247309:clu_51808:ENSG00000117616.17	Adipose_Subcutaneous	1:25713333:CS1	0.952403	0.0641658	-0.00285428	0.0625762	0.00491225	0.000326758	rs55794721
Alanine Aminotransferase	chr1:25247029:25247309:clu_53369:ENSG00000117616.17	Nerve_Tibial	1:25713333:CS1	0.952403	0.0641658	-0.00374899	0	0.00491225	0.000326758	rs55794721
Alanine Aminotransferase	chr1:25247029:25247309:clu_55080:ENSG00000117616.17	Lung	1:25713333:CS1	0.952403	0.0641658	-0.00415066	0.0714165	0.00491225	0.000326758	rs55794721
Alanine Aminotransferase	chr1:25247029:25247309:clu_55459:ENSG00000117616.17	Thyroid	1:25713333:CS1	0.952403	0.0641658	-0.00367567	0.0395118	0.00491225	0.000326758	rs55794721
Alanine Aminotransferase	chr1:25247029:25337040:clu_40236:ENSG00000117616.17	Adrenal_Gland	1:25713333:CS1	0.952403	0.0641658	-0.00398392	0	0.00491225	0.000326758	rs55794721
Alanine Aminotransferase	chr1:25247029:25337040:clu_41837:ENSG00000117616.17	Fibroblasts	1:25713333:CS1	0.952403	0.0641658	-0.00284364	0.0442693	0.00491225	0.000326758	rs55794721
Alanine Aminotransferase	chr1:25247029:25337040:clu_42715:ENSG00000117616.17	Spleen	1:25713333:CS1	0.952403	0.0641658	-0.00418521	0.0731958	0.00491225	0.000326758	rs55794721
Alanine Aminotransferase	chr1:25247029:25337040:clu_43733:ENSG00000117616.17	Brain_Cerebellum	1:25713333:CS1	0.952403	0.0641658	-0.0041882	0	0.00491225	0.000326758	rs55794721
Alanine Aminotransferase	chr1:25247029:25337040:clu_44607:ENSG00000117616.17	Esophagus_Junction	1:25713333:CS1	0.952403	0.0641658	-0.00340565	0.0558651	0.00491225	0.000326758	rs55794721
Alanine Aminotransferase	chr1:25247029:25337040:clu_45307:ENSG00000117616.17	Heart_Atrial_Appendage	1:25713333:CS1	0.952403	0.0641658	-0.00325706	0.061926	0.00491225	0.000326758	rs55794721
Alanine Aminotransferase	chr1:25247029:25337040:clu_45567:ENSG00000117616.17	Colon_Sigmoid	1:25713333:CS1	0.952403	0.0641658	-0.00340175	0.0418631	0.00491225	0.000326758	rs55794721
Alanine Aminotransferase	chr1:25247029:25337040:clu_45670:ENSG00000117616.17	Artery_Aorta	1:25713333:CS1	0.952403	0.0641658	-0.003019	0	0.00491225	0.000326758	rs55794721
Alanine Aminotransferase	chr1:25247029:25337040:clu_47185:ENSG00000117616.17	Esophagus_Muscularis	1:25713333:CS1	0.952403	0.0641658	-0.00283065	0.0407458	0.00491225	0.000326758	rs55794721
Alanine Aminotransferase	chr1:25247029:25337040:clu_47441:ENSG00000117616.17	Esophagus_Mucosa	1:25713333:CS1	0.952403	0.0641658	-0.00282173	0.0405891	0.00491225	0.000326758	rs55794721
Alanine Aminotransferase	chr1:25247029:25337040:clu_47905:ENSG00000117616.17	Artery_Tibial	1:25713333:CS1	0.952403	0.0641658	-0.00255129	0.0390924	0.00491225	0.000326758	rs55794721
Alanine Aminotransferase	chr1:25247029:25337040:clu_49137:ENSG00000117616.17	Pituitary	1:25713333:CS1	0.952403	0.0641658	-0.00418429	0.0567561	0.00491225	0.000326758	rs55794721
Alanine Aminotransferase	chr1:25247029:25337040:clu_50453:ENSG00000117616.17	Adipose_Visceral	1:25713333:CS1	0.952403	0.0641658	-0.00292847	0	0.00491225	0.000326758	rs55794721
Alanine Aminotransferase	chr1:25247029:25337040:clu_51808:ENSG00000117616.17	Adipose_Subcutaneous	1:25713333:CS1	0.952403	0.0641658	-0.00252895	0.0402408	0.00491225	0.000326758	rs55794721
Alanine Aminotransferase	chr1:25247029:25337040:clu_53369:ENSG00000117616.17	Nerve_Tibial	1:25713333:CS1	0.952403	0.0641658	-0.00268743	0	0.00491225	0.000326758	rs55794721
Alanine Aminotransferase	chr1:25247029:25337040:clu_55080:ENSG00000117616.17	Lung	1:25713333:CS1	0.952403	0.0641658	-0.00263123	0.0307428	0.00491225	0.000326758	rs55794721
Alanine Aminotransferase	chr1:25247029:25337040:clu_55459:ENSG00000117616.17	Thyroid	1:25713333:CS1	0.952403	0.0641658	-0.00247701	0	0.00491225	0.000326758	rs55794721
Alanine Aminotransferase	chr1:25247029:25338069:clu_45567:ENSG00000117616.17	Colon_Sigmoid	1:25713333:CS1	0.952403	0.0641658	-0.0035912	0.0571549	0.00491225	0.000326758	rs55794721
Alanine Aminotransferase	chr1:25247029:25338069:clu_45670:ENSG00000117616.17	Artery_Aorta	1:25713333:CS1	0.952403	0.0641658	-0.00318822	0.0492033	0.00491225	0.000326758	rs55794721
Alanine Aminotransferase	chr1:25247029:25338069:clu_47905:ENSG00000117616.17	Artery_Tibial	1:25713333:CS1	0.952403	0.0641658	-0.0025201	0.0359313	0.00491225	0.000326758	rs55794721
Alanine Aminotransferase	chr1:25247029:25338069:clu_53369:ENSG00000117616.17	Nerve_Tibial	1:25713333:CS1	0.952403	0.0641658	-0.00268837	0	0.00491225	0.000326758	rs55794721
Alanine Aminotransferase	chr1:25247029:25338069:clu_55459:ENSG00000117616.17	Thyroid	1:25713333:CS1	0.952403	0.0641658	-0.00259699	0.042676	0.00491225	0.000326758	rs55794721
Alanine Aminotransferase	chr1:25253937:25267740:clu_45670:ENSG00000117616.17	Artery_Aorta	1:25713333:CS1	0.952403	0.0641658	0.00491321	0.0760608	0.00491225	0.000326758	rs55794721
Alanine Aminotransferase	chr1:25253937:25267740:clu_49137:ENSG00000117616.17	Pituitary	1:25713333:CS1	0.952403	0.0641658	0.026313	0.19425	0.0249906	0.0019004	rs34296216~rs55794721
Alanine Aminotransferase	chr1:25294740:25337040:clu_41837:ENSG00000117616.17	Fibroblasts	1:25713333:CS1	0.952403	0.0641658	0.00312918	0.0469149	0.00491225	0.000326758	rs55794721
Alanine Aminotransferase	chr1:25294740:25337040:clu_51808:ENSG00000117616.17	Adipose_Subcutaneous	1:25713333:CS1	0.952403	0.0641658	0.00374502	0.0536801	0.00491225	0.000326758	rs55794721
Alanine Aminotransferase	chr1:25294740:25337040:clu_55459:ENSG00000117616.17	Thyroid	1:25713333:CS1	0.952403	0.0641658	0.0032648	0.0346377	0.00491225	0.000326758	rs55794721
Alanine Aminotransferase	chr1:25304821:25306562:clu_40750:ENSG00000117616.17	Whole_Blood	1:25713333:CS1	0.952403	0.0641658	0.00377232	0.0528028	0.00491225	0.000326758	rs55794721
Alanine Aminotransferase	chr1:25304821:25306562:clu_42715:ENSG00000117616.17	Spleen	1:25713333:CS1	0.952403	0.0641658	0.00555277	0.0648115	0.00491225	0.000326758	rs55794721
Alanine Aminotransferase	chr1:25304821:25306896:clu_41837:ENSG00000117616.17	Fibroblasts	1:25713333:CS1	0.952403	0.0641658	0.00402908	0	0.00491225	0.000326758	rs55794721
Alanine Aminotransferase	chr1:25304821:25318063:clu_40750:ENSG00000117616.17	Whole_Blood	1:25713333:CS1	0.952403	0.0641658	0.00322655	0.0714184	0.00491225	0.000326758	rs55794721
Alanine Aminotransferase	chr1:25304821:25318063:clu_42715:ENSG00000117616.17	Spleen	1:25713333:CS1	0.952403	0.0641658	0.0048546	0.0571734	0.00491225	0.000326758	rs55794721
Alanine Aminotransferase	chr1:25304821:25318063:clu_45307:ENSG00000117616.17	Heart_Atrial_Appendage	1:25713333:CS1	0.952403	0.0641658	0.0047273	0.0738843	0.00491225	0.000326758	rs55794721
Alanine Aminotransferase	chr1:25304821:25318063:clu_45567:ENSG00000117616.17	Colon_Sigmoid	1:25713333:CS1	0.952403	0.0641658	0.00430264	0	0.00491225	0.000326758	rs55794721
Alanine Aminotransferase	chr1:25304821:25318063:clu_45670:ENSG00000117616.17	Artery_Aorta	1:25713333:CS1	0.952403	0.0641658	0.00382766	0	0.00491225	0.000326758	rs55794721
Alanine Aminotransferase	chr1:25304821:25318063:clu_47185:ENSG00000117616.17	Esophagus_Muscularis	1:25713333:CS1	0.952403	0.0641658	0.00808674	0.0982557	0.00906428	0.000647793	rs55794721~rs6694897
Alanine Aminotransferase	chr1:25304821:25318063:clu_47905:ENSG00000117616.17	Artery_Tibial	1:25713333:CS1	0.952403	0.0641658	0.00288571	0.0457351	0.00491225	0.000326758	rs55794721
Alanine Aminotransferase	chr1:25304821:25318063:clu_50453:ENSG00000117616.17	Adipose_Visceral	1:25713333:CS1	0.952403	0.0641658	0.00425252	0	0.00491225	0.000326758	rs55794721
Alanine Aminotransferase	chr1:25304821:25318063:clu_51808:ENSG00000117616.17	Adipose_Subcutaneous	1:25713333:CS1	0.952403	0.0641658	0.00321117	0.0419256	0.00491225	0.000326758	rs55794721
Alanine Aminotransferase	chr1:25304821:25318063:clu_53369:ENSG00000117616.17	Nerve_Tibial	1:25713333:CS1	0.952403	0.0641658	0.00317339	0.0461365	0.00491225	0.000326758	rs55794721
Alanine Aminotransferase	chr1:25304821:25318063:clu_55459:ENSG00000117616.17	Thyroid	1:25713333:CS1	0.952403	0.0641658	0.00330816	0	0.00491225	0.000326758	rs55794721
Alanine Aminotransferase	chr1:25304821:25337040:clu_40750:ENSG00000117616.17	Whole_Blood	1:25713333:CS1	0.952403	0.0641658	0.00334395	0.0382674	0.00491225	0.000326758	rs55794721
Alanine Aminotransferase	chr1:25304821:25337040:clu_42715:ENSG00000117616.17	Spleen	1:25713333:CS1	0.952403	0.0641658	0.00577848	0.115327	0.00491225	0.000326758	rs55794721
Alanine Aminotransferase	chr1:25304821:25337040:clu_45670:ENSG00000117616.17	Artery_Aorta	1:25713333:CS1	0.952403	0.0641658	0.00427436	0	0.00491225	0.000326758	rs55794721
Alanine Aminotransferase	chr1:25304821:25337040:clu_47905:ENSG00000117616.17	Artery_Tibial	1:25713333:CS1	0.952403	0.0641658	0.00334638	0	0.00491225	0.000326758	rs55794721
Alanine Aminotransferase	chr1:25304821:25337040:clu_53369:ENSG00000117616.17	Nerve_Tibial	1:25713333:CS1	0.952403	0.0641658	0.00365115	0	0.00491225	0.000326758	rs55794721
Alanine Aminotransferase	chr1:25304821:25337040:clu_55080:ENSG00000117616.17	Lung	1:25713333:CS1	0.952403	0.0641658	0.00368793	0.0744252	0.00491225	0.000326758	rs55794721
Alanine Aminotransferase	chr1:25304821:25337040:clu_55459:ENSG00000117616.17	Thyroid	1:25713333:CS1	0.952403	0.0641658	0.00319154	0.0295449	0.00491225	0.000326758	rs55794721
Alanine Aminotransferase	chr1:25306949:25318063:clu_40750:ENSG00000117616.17	Whole_Blood	1:25713333:CS1	0.952403	0.0641658	0.00346999	0.0499095	0.00491225	0.000326758	rs55794721
Alanine Aminotransferase	chr1:25306949:25318063:clu_41837:ENSG00000117616.17	Fibroblasts	1:25713333:CS1	0.952403	0.0641658	0.00356348	0.0411424	0.00491225	0.000326758	rs55794721
Alanine Aminotransferase	chr1:25306949:25318063:clu_42715:ENSG00000117616.17	Spleen	1:25713333:CS1	0.952403	0.0641658	0.00543626	0	0.00491225	0.000326758	rs55794721
Alanine Aminotransferase	chr1:25306949:25337040:clu_40750:ENSG00000117616.17	Whole_Blood	1:25713333:CS1	0.952403	0.0641658	0.00335754	0.0797149	0.00491225	0.000326758	rs55794721
Alanine Aminotransferase	chr1:25306949:25337040:clu_55459:ENSG00000117616.17	Thyroid	1:25713333:CS1	0.952403	0.0641658	0.00310497	0	0.00491225	0.000326758	rs55794721
Alanine Aminotransferase	chr1:25318271:25337040:clu_40236:ENSG00000117616.17	Adrenal_Gland	1:25713333:CS1	0.952403	0.0641658	0.00741956	0.119142	0.00491225	0.000326758	rs55794721
Alanine Aminotransferase	chr1:25318271:25337040:clu_40750:ENSG00000117616.17	Whole_Blood	1:25713333:CS1	0.952403	0.0641658	0.00283301	0	0.00491225	0.000326758	rs55794721
Alanine Aminotransferase	chr1:25318271:25337040:clu_41837:ENSG00000117616.17	Fibroblasts	1:25713333:CS1	0.952403	0.0641658	0.00293154	0.0376133	0.00491225	0.000326758	rs55794721
Alanine Aminotransferase	chr1:25318271:25337040:clu_42715:ENSG00000117616.17	Spleen	1:25713333:CS1	0.952403	0.0641658	0.0051125	0.101926	0.00491225	0.000326758	rs55794721
Alanine Aminotransferase	chr1:25318271:25337040:clu_44607:ENSG00000117616.17	Esophagus_Junction	1:25713333:CS1	0.952403	0.0641658	0.00473642	0	0.00491225	0.000326758	rs55794721
Alanine Aminotransferase	chr1:25318271:25337040:clu_45307:ENSG00000117616.17	Heart_Atrial_Appendage	1:25713333:CS1	0.952403	0.0641658	0.00378716	0.0617409	0.00491225	0.000326758	rs55794721
Alanine Aminotransferase	chr1:25318271:25337040:clu_45567:ENSG00000117616.17	Colon_Sigmoid	1:25713333:CS1	0.952403	0.0641658	0.00428661	0.0840337	0.00491225	0.000326758	rs55794721
Alanine Aminotransferase	chr1:25318271:25337040:clu_45670:ENSG00000117616.17	Artery_Aorta	1:25713333:CS1	0.952403	0.0641658	0.00403795	0.0568382	0.00491225	0.000326758	rs55794721
Alanine Aminotransferase	chr1:25318271:25337040:clu_47185:ENSG00000117616.17	Esophagus_Muscularis	1:25713333:CS1	0.952403	0.0641658	0.00343554	0	0.00491225	0.000326758	rs55794721
Alanine Aminotransferase	chr1:25318271:25337040:clu_50453:ENSG00000117616.17	Adipose_Visceral	1:25713333:CS1	0.952403	0.0641658	0.00416892	0.082704	0.00491225	0.000326758	rs55794721
Alanine Aminotransferase	chr1:25318271:25337040:clu_51808:ENSG00000117616.17	Adipose_Subcutaneous	1:25713333:CS1	0.952403	0.0641658	0.00312811	0.0522648	0.00491225	0.000326758	rs55794721
Alanine Aminotransferase	chr1:25318271:25337040:clu_55080:ENSG00000117616.17	Lung	1:25713333:CS1	0.952403	0.0641658	0.00319629	0.0511549	0.00491225	0.000326758	rs55794721
Alanine Aminotransferase	chr1:25318271:25337040:clu_55459:ENSG00000117616.17	Thyroid	1:25713333:CS1	0.952403	0.0641658	0.00282111	0	0.00491225	0.000326758	rs55794721
Alanine Aminotransferase	chr1:25333621:25333709:clu_47905:ENSG00000117616.17	Artery_Tibial	1:25713333:CS1	0.952403	0.0641658	0.0030983	0	0.00491225	0.000326758	rs55794721
Alanine Aminotransferase	chr1:25370540:25375349:clu_45987:ENSG00000188672.17	Muscle_Skeletal	1:25713333:CS1	0.952403	0.0641658	0.00474765	0.066273	0.00491225	0.000326758	rs55794721
Alanine Aminotransferase	LOC101928728	Colon_Transverse	1:27021913:CS1	1	0.319768	-1.90495	3.38037	0.25	0.079942	rs114165349
Alanine Aminotransferase	LOC101928728	Spleen	1:27021913:CS1	1	0.319768	-3.06737	5.24901	0.25	0.079942	rs114165349
Alanine Aminotransferase	PIGV	Adipose_Subcutaneous	1:27021913:CS1	1	0.319768	-0.592152	0.972201	0.25	0.079942	rs114165349
Alanine Aminotransferase	ZDHHC18	Nerve_Tibial	1:27021913:CS1	1	0.319768	1.52554	2.71281	0.25	0.079942	rs114165349
Alanine Aminotransferase	HMGN2	Adipose_Subcutaneous	1:28572317:CS1	0.957738	0.0766602	0.445717	1.93021	0.0532077	0.0042589	rs41291086
Alanine Aminotransferase	HMGN2	Adipose_Visceral	1:28572317:CS1	0.957738	0.0766602	0.0725256	0.312832	0.0532077	0.0042589	rs41291086
Alanine Aminotransferase	HMGN2	Artery_Tibial	1:28572317:CS1	0.957738	0.0766602	0.43935	2.19221	0.0532077	0.0042589	rs41291086
Alanine Aminotransferase	HMGN2	Islets	1:28572317:CS1	0.957738	0.0766602	-0.844597	3.44305	0.0532077	0.0042589	rs41291086
Alanine Aminotransferase	HMGN2	Whole_Blood	1:28572317:CS1	0.957738	0.0766602	0.450093	1.81904	0.0532077	0.0042589	rs41291086
Alanine Aminotransferase	PIGV	Adipose_Subcutaneous	1:28572317:CS1	0.957738	0.0766602	-0.190704	0.819877	0.0532077	0.0042589	rs41291086
Alanine Aminotransferase	PIGV	Adipose_Visceral	1:28572317:CS1	0.957738	0.0766602	-0.201363	0.904517	0.0532077	0.0042589	rs41291086
Alanine Aminotransferase	SYTL1	Brain_Cerebellum	1:28572317:CS1	0.957738	0.0766602	-0.0564345	0.252373	0.0532077	0.0042589	rs41291086
Alanine Aminotransferase	SYTL1	Esophagus_Mucosa	1:28572317:CS1	0.957738	0.0766602	-0.0400232	0.176008	0.0532077	0.0042589	rs41291086
Alanine Aminotransferase	SYTL1	Lung	1:28572317:CS1	0.957738	0.0766602	-0.153058	0.662843	0.0532077	0.0042589	rs41291086
Alanine Aminotransferase	chr1:26852865:26853462:clu_40820:ENSG00000204160.11	Whole_Blood	1:28572317:CS1	0.957738	0.0766602	0.0920808	0.334365	0.0532077	0.0042589	rs41291086
Alanine Aminotransferase	chr1:26852865:26853726:clu_40820:ENSG00000204160.11	Whole_Blood	1:28572317:CS1	0.957738	0.0766602	-0.0705253	0.339989	0.0532077	0.0042589	rs41291086
Alanine Aminotransferase	chr1:27342150:27345297:clu_39438:ENSG00000142765.17	Pancreas	1:28572317:CS1	0.957738	0.0766602	-0.190151	0.910258	0.0532077	0.0042589	rs41291086
Alanine Aminotransferase	chr1:27342150:27345297:clu_40848:ENSG00000142765.17	Whole_Blood	1:28572317:CS1	0.957738	0.0766602	-0.240884	0.879595	0.0532077	0.0042589	rs41291086
Alanine Aminotransferase	chr1:27342150:27345297:clu_47569:ENSG00000142765.17	Esophagus_Mucosa	1:28572317:CS1	0.957738	0.0766602	-0.0432028	0.188345	0.0532077	0.0042589	rs41291086
Alanine Aminotransferase	chr1:27342367:27345297:clu_39438:ENSG00000142765.17	Pancreas	1:28572317:CS1	0.957738	0.0766602	0.0863121	0.318716	0.0532077	0.0042589	rs41291086
Alanine Aminotransferase	chr1:27342367:27345297:clu_40848:ENSG00000142765.17	Whole_Blood	1:28572317:CS1	0.957738	0.0766602	0.259669	1.06571	0.0532077	0.0042589	rs41291086
Alanine Aminotransferase	chr1:27342367:27345297:clu_47569:ENSG00000142765.17	Esophagus_Mucosa	1:28572317:CS1	0.957738	0.0766602	0.0424929	0.162348	0.0532077	0.0042589	rs41291086
Alanine Aminotransferase	CDKN2C	Whole_Blood	1:50839740:CS1	0.991029	0.377732	-0.239281	1.06346	0.0431498	0.0150582	rs2356864
Alanine Aminotransferase	chr1:48663241:48867191:clu_50095:ENSG00000186094.16	Pituitary	1:50839740:CS1	0.991029	0.377732	-6.73211	1.8386	0.947879	0.362674	rs2765892~rs2356864
Alanine Aminotransferase	ANGPTL3	Kidney_Glom	1:62579891:CS1	0.999866	0.107529	4.02318	0.731006	0.999866	0.107529	rs12140153
Alanine Aminotransferase	ANGPTL3	Kidney_Tube	1:62579891:CS2	0.961921	0.0402398	0.017556	0.0970952	0.0262379	0.0011008	rs11207982
Alanine Aminotransferase	ATG4C	Stomach	1:62579891:CS2	0.961921	0.0402398	-0.068557	0.383855	0.0262379	0.0011008	rs11207982
Alanine Aminotransferase	DOCK7	Artery_Aorta	1:62579891:CS2	0.961921	0.0402398	0.0148563	0.0837532	0.0262379	0.0011008	rs11207982
Alanine Aminotransferase	DOCK7	Artery_Tibial	1:62579891:CS2	0.961921	0.0402398	0.012293	0.0769956	0.0262379	0.0011008	rs11207982
Alanine Aminotransferase	DOCK7	Colon_Sigmoid	1:62579891:CS2	0.961921	0.0402398	0.0189893	0.109361	0.0262379	0.0011008	rs11207982
Alanine Aminotransferase	DOCK7	Colon_Transverse	1:62579891:CS2	0.961921	0.0402398	0.0310992	0.250621	0.0262379	0.0011008	rs11207982
Alanine Aminotransferase	DOCK7	Esophagus_Junction	1:62579891:CS2	0.961921	0.0402398	0.0164555	0.136321	0.0262379	0.0011008	rs11207982
Alanine Aminotransferase	DOCK7	Esophagus_Muscularis	1:62579891:CS2	0.961921	0.0402398	0.0157327	0.119088	0.0262379	0.0011008	rs11207982
Alanine Aminotransferase	DOCK7	Fibroblasts	1:62579891:CS2	0.961921	0.0402398	0.00950478	0.0505727	0.0262379	0.0011008	rs11207982
Alanine Aminotransferase	DOCK7	Heart_Atrial_Appendage	1:62579891:CS2	0.961921	0.0402398	0.0534956	0.304119	0.0262379	0.0011008	rs11207982
Alanine Aminotransferase	DOCK7	Heart_Left_Ventricle	1:62579891:CS2	0.961921	0.0402398	0.0285219	0.113759	0.0262379	0.0011008	rs11207982
Alanine Aminotransferase	DOCK7	Lung	1:62579891:CS2	0.961921	0.0402398	0.0192487	0.149993	0.0262379	0.0011008	rs11207982
Alanine Aminotransferase	DOCK7	Small_Intestine	1:62579891:CS2	0.961921	0.0402398	0.0399775	0.190651	0.0262379	0.0011008	rs11207982
Alanine Aminotransferase	DOCK7	Whole_Blood	1:62579891:CS2	0.961921	0.0402398	0.0116701	0.0512787	0.0262379	0.0011008	rs11207982
Alanine Aminotransferase	USP1	Kidney_Tube	1:62579891:CS2	0.961921	0.0402398	0.0304421	0.202381	0.0262379	0.0011008	rs11207982
Alanine Aminotransferase	USP1	Nerve_Tibial	1:62579891:CS2	0.961921	0.0402398	0.02271	0.07548	0.0262379	0.0011008	rs11207982
Alanine Aminotransferase	chr1:62577363:62578828:clu_54685:ENSG00000116641.17	Nerve_Tibial	1:62579891:CS2	0.961921	0.0402398	0.0253142	0.205705	0.0262379	0.0011008	rs11207982
Alanine Aminotransferase	chr1:62578966:62583184:clu_41684:ENSG00000116641.17	Brain_Cortex	1:62579891:CS2	0.961921	0.0402398	0.0600323	0.344615	0.0262379	0.0011008	rs11207982
Alanine Aminotransferase	chr1:62583254:62586507:clu_41684:ENSG00000116641.17	Brain_Cortex	1:62579891:CS2	0.961921	0.0402398	0.0287956	0.162307	0.0262379	0.0011008	rs11207982
Alanine Aminotransferase	chr1:62583254:62586507:clu_48353:ENSG00000116641.17	Esophagus_Muscularis	1:62579891:CS2	0.961921	0.0402398	0.0417526	0.243778	0.0262379	0.0011008	rs11207982
Alanine Aminotransferase	chr1:62583254:62586507:clu_54685:ENSG00000116641.17	Nerve_Tibial	1:62579891:CS2	0.961921	0.0402398	0.0314888	0.201881	0.0262379	0.0011008	rs11207982
Alanine Aminotransferase	chr1:62584878:62586507:clu_41684:ENSG00000116641.17	Brain_Cortex	1:62579891:CS2	0.961921	0.0402398	-0.0157157	0.103183	0.0262379	0.0011008	rs11207982
Alanine Aminotransferase	chr1:62584878:62586507:clu_42859:ENSG00000116641.17	Fibroblasts	1:62579891:CS2	0.961921	0.0402398	-0.00889091	0.0547629	0.0173587	0.000610981	rs2498962~rs11207982
Alanine Aminotransferase	chr1:62584878:62586507:clu_45648:ENSG00000116641.17	Small_Intestine	1:62579891:CS2	0.961921	0.0402398	-0.0915845	0.55847	0.0262379	0.0011008	rs11207982
Alanine Aminotransferase	chr1:62584878:62586507:clu_45751:ENSG00000116641.17	Esophagus_Junction	1:62579891:CS2	0.961921	0.0402398	-0.0172459	0.131483	0.0262379	0.0011008	rs11207982
Alanine Aminotransferase	chr1:62584878:62586507:clu_46065:ENSG00000116641.17	Stomach	1:62579891:CS2	0.961921	0.0402398	-0.0250807	0.190364	0.0262379	0.0011008	rs11207982
Alanine Aminotransferase	chr1:62584878:62586507:clu_46709:ENSG00000116641.17	Colon_Sigmoid	1:62579891:CS2	0.961921	0.0402398	-0.0147232	0.0981551	0.0262379	0.0011008	rs11207982
Alanine Aminotransferase	chr1:62584878:62586507:clu_46834:ENSG00000116641.17	Artery_Aorta	1:62579891:CS2	0.961921	0.0402398	-0.0156934	0.107899	0.0262379	0.0011008	rs11207982
Alanine Aminotransferase	chr1:62584878:62586507:clu_48353:ENSG00000116641.17	Esophagus_Muscularis	1:62579891:CS2	0.961921	0.0402398	-0.0126473	0.0956058	0.0262379	0.0011008	rs11207982
Alanine Aminotransferase	chr1:62584878:62586507:clu_49086:ENSG00000116641.17	Artery_Tibial	1:62579891:CS2	0.961921	0.0402398	-0.0135264	0.0769744	0.0262379	0.0011008	rs11207982
Alanine Aminotransferase	chr1:62584878:62586507:clu_50346:ENSG00000116641.17	Pituitary	1:62579891:CS2	0.961921	0.0402398	-0.0332273	0.241872	0.0262379	0.0011008	rs11207982
Alanine Aminotransferase	chr1:62584878:62586507:clu_50623:ENSG00000116641.17	Colon_Transverse	1:62579891:CS2	0.961921	0.0402398	-0.0242334	0.137798	0.0262379	0.0011008	rs11207982
Alanine Aminotransferase	chr1:62584878:62586507:clu_53069:ENSG00000116641.17	Adipose_Subcutaneous	1:62579891:CS2	0.961921	0.0402398	-0.0121053	0.0720532	0.0262379	0.0011008	rs11207982
Alanine Aminotransferase	chr1:62584878:62586507:clu_54685:ENSG00000116641.17	Nerve_Tibial	1:62579891:CS2	0.961921	0.0402398	-0.00978797	0.0492712	0.0262379	0.0011008	rs11207982
Alanine Aminotransferase	chr1:62584878:62586507:clu_56414:ENSG00000116641.17	Lung	1:62579891:CS2	0.961921	0.0402398	-0.0178257	0.143748	0.0262379	0.0011008	rs11207982
Alanine Aminotransferase	chr1:62654159:62663025:clu_42863:ENSG00000116641.17	Fibroblasts	1:62579891:CS2	0.961921	0.0402398	0.050955	0.257986	0.0262379	0.0011008	rs11207982
Alanine Aminotransferase	chr1:62687656:62688227:clu_42863:ENSG00000116641.17	Fibroblasts	1:62579891:CS2	0.961921	0.0402398	-0.0300872	0.182604	0.0262379	0.0011008	rs11207982
Alanine Aminotransferase	chr1:65425378:65431803:clu_48716:ENSG00000116678.19	Esophagus_Mucosa	1:66097181:CS1	0.978847	0.123419	0.63671	0.677474	0.489423	0.0617096	rs6690625
Alanine Aminotransferase	chr1:65425378:65431803:clu_48716:ENSG00000213625.8	Esophagus_Mucosa	1:66097181:CS1	0.978847	0.123419	0.65393	0.704181	0.489423	0.0617096	rs6690625
Alanine Aminotransferase	chr1:81445089:81580876:clu_56670:ENSG00000117114.19	Lung	1:82352199:CS1	0.999296	0.376841	-4.3386	4.47122	0.499648	0.18842	rs12723257
Alanine Aminotransferase	chr1:81987341:81990391:clu_48593:ENSG00000117114.19	Esophagus_Muscularis	1:82352199:CS1	0.999296	0.376841	-5.70591	5.88376	0.499648	0.18842	rs12723257
Alanine Aminotransferase	chr1:88805671:88805891:clu_47145:ENSG00000065243.19	Artery_Aorta	1:89171220:CS1	0.9768	0.159379	-0.0595776	0.310136	0.0294702	0.00483842	rs12140288~rs805047
Alanine Aminotransferase	chr1:88805671:88805891:clu_47457:ENSG00000065243.19	Muscle_Skeletal	1:89171220:CS1	0.9768	0.159379	-0.161928	0.526051	0.0876363	0.0143071	rs805047
Alanine Aminotransferase	chr1:88805671:88805891:clu_53432:ENSG00000065243.19	Adipose_Subcutaneous	1:89171220:CS1	0.9768	0.159379	-0.109922	0.399431	0.0876363	0.0143071	rs805047
Alanine Aminotransferase	chr1:88805671:88805891:clu_57214:ENSG00000065243.19	Thyroid	1:89171220:CS1	0.9768	0.159379	-0.207705	0.624022	0.0876363	0.0143071	rs805047
Alanine Aminotransferase	chr1:88806017:88807313:clu_47145:ENSG00000065243.19	Artery_Aorta	1:89171220:CS1	0.9768	0.159379	0.255114	0.81521	0.0876363	0.0143071	rs805047
Alanine Aminotransferase	chr1:88806017:88807313:clu_47457:ENSG00000065243.19	Muscle_Skeletal	1:89171220:CS1	0.9768	0.159379	0.160425	0.535698	0.0876363	0.0143071	rs805047
Alanine Aminotransferase	chr1:88806017:88807313:clu_53432:ENSG00000065243.19	Adipose_Subcutaneous	1:89171220:CS1	0.9768	0.159379	0.105141	0.294329	0.0876363	0.0143071	rs805047
Alanine Aminotransferase	chr1:88806017:88807313:clu_57214:ENSG00000065243.19	Thyroid	1:89171220:CS1	0.9768	0.159379	0.1336	0.429059	0.0876363	0.0143071	rs805047
Alanine Aminotransferase	chr1:88955225:88961381:clu_44004:ENSG00000137944.17	Spleen	1:89171220:CS1	0.9768	0.159379	-0.0876763	0.45814	0.0428898	0.00698294	rs805047~rs6691473
Alanine Aminotransferase	chr1:88962145:88964556:clu_57225:ENSG00000137944.17	Thyroid	1:89171220:CS1	0.9768	0.159379	0.284729	0.958805	0.0876363	0.0143071	rs805047
Alanine Aminotransferase	chr1:88962145:88964829:clu_42015:ENSG00000137944.17	Whole_Blood	1:89171220:CS1	0.9768	0.159379	-0.0334846	0.225982	0.0280766	0.00448703	rs805047~rs6691473
Alanine Aminotransferase	chr1:88984066:88992585:clu_57224:ENSG00000137944.17	Thyroid	1:89171220:CS1	0.9768	0.159379	-0.57054	1.92644	0.0876363	0.0143071	rs805047
Alanine Aminotransferase	chr1:88984066:88992585:clu_57224:ENSG00000213516.9	Thyroid	1:89171220:CS1	0.9768	0.159379	-0.57054	1.99023	0.0876363	0.0143071	rs805047
Alanine Aminotransferase	PKN2	Muscle_Skeletal	1:89171220:CS2	0.977785	0.0936489	0.313018	0.577244	0.244446	0.0234122	rs71666203
Alanine Aminotransferase	chr1:88684628:88740988:clu_48673:ENSG00000065243.19	Esophagus_Muscularis	1:89171220:CS2	0.977785	0.0936489	-0.218954	0.386009	0.244446	0.0234122	rs71666203
Alanine Aminotransferase	chr1:88684628:88740988:clu_50950:ENSG00000065243.19	Colon_Transverse	1:89171220:CS2	0.977785	0.0936489	-0.243052	0.432976	0.244446	0.0234122	rs71666203
Alanine Aminotransferase	chr1:88684628:88740988:clu_53429:ENSG00000065243.19	Adipose_Subcutaneous	1:89171220:CS2	0.977785	0.0936489	-0.197312	0.372088	0.244446	0.0234122	rs71666203
Alanine Aminotransferase	LOC100421273	Muscle_Skeletal	1:93678966:CS1	0.951499	0.0920012	0.259912	0.923504	0.0754696	0.00736582	rs61799516
Alanine Aminotransferase	chr1:93156483:93158815:clu_41610:ENSG00000117500.12	Adrenal_Gland	1:93678966:CS1	0.951499	0.0920012	0.212081	0.768705	0.0754696	0.00736582	rs61799516
Alanine Aminotransferase	chr1:93156483:93158815:clu_49515:ENSG00000117500.12	Artery_Tibial	1:93678966:CS1	0.951499	0.0920012	0.103332	0.323241	0.0564618	0.00546446	rs12118262~rs61799516
Alanine Aminotransferase	chr1:93156483:93160129:clu_41610:ENSG00000117500.12	Adrenal_Gland	1:93678966:CS1	0.951499	0.0920012	-0.41959	1.53598	0.0754696	0.00736582	rs61799516
Alanine Aminotransferase	chr1:93156483:93160129:clu_52094:ENSG00000117500.12	Adipose_Visceral	1:93678966:CS1	0.951499	0.0920012	-0.0738724	0.317293	0.0627122	0.00611818	rs12118262~rs61799516
Alanine Aminotransferase	chr1:93156483:93160129:clu_53532:ENSG00000117500.12	Adipose_Subcutaneous	1:93678966:CS1	0.951499	0.0920012	-0.10484	0.338547	0.0879683	0.00879685	rs12118262~rs61799516
Alanine Aminotransferase	chr1:93305470:93337377:clu_50761:ENSG00000223745.7	Pituitary	1:93678966:CS1	0.951499	0.0920012	-0.131506	0.485285	0.0754696	0.00736582	rs61799516
Alanine Aminotransferase	chr1:93305470:93337377:clu_55181:ENSG00000223745.7	Nerve_Tibial	1:93678966:CS1	0.951499	0.0920012	-0.0422231	0.28908	0.021871	0.00186291	rs2783490~rs61799516
Alanine Aminotransferase	chr1:93315269:93324635:clu_46125:ENSG00000223745.7	Esophagus_Junction	1:93678966:CS1	0.951499	0.0920012	0.0897565	0.310797	0.0754696	0.00736582	rs61799516
Alanine Aminotransferase	chr1:93315269:93324635:clu_48771:ENSG00000223745.7	Esophagus_Muscularis	1:93678966:CS1	0.951499	0.0920012	0.0142594	0.165178	0.0136201	0.0011054	rs2783490~rs61799516
Alanine Aminotransferase	chr1:93315269:93324635:clu_50761:ENSG00000223745.7	Pituitary	1:93678966:CS1	0.951499	0.0920012	0.0769472	0.283913	0.0754696	0.00736582	rs61799516
Alanine Aminotransferase	chr1:93315269:93324635:clu_55181:ENSG00000223745.7	Nerve_Tibial	1:93678966:CS1	0.951499	0.0920012	0.0129933	0.093188	0.0183269	0.00153342	rs2783490~rs61799516
Alanine Aminotransferase	chr1:93315269:93324635:clu_56887:ENSG00000223745.7	Lung	1:93678966:CS1	0.951499	0.0920012	0.0918143	0.320587	0.0768524	0.00741384	rs2783490~rs61799516
Alanine Aminotransferase	chr1:93325895:93326602:clu_48771:ENSG00000223745.7	Esophagus_Muscularis	1:93678966:CS1	0.951499	0.0920012	0.118866	0.405293	0.0754696	0.00736582	rs61799516
Alanine Aminotransferase	chr1:93325895:93326602:clu_49516:ENSG00000223745.7	Artery_Tibial	1:93678966:CS1	0.951499	0.0920012	0.132966	0.478553	0.0754696	0.00736582	rs61799516
Alanine Aminotransferase	chr1:93325895:93326602:clu_57319:ENSG00000223745.7	Thyroid	1:93678966:CS1	0.951499	0.0920012	0.0167715	0.191085	0.00992976	0.00077957	rs2783490~rs61799516
Alanine Aminotransferase	chr1:109689325:109690271:clu_47785:ENSG00000134184.12	Muscle_Skeletal	1:110232983:CS1	0.961744	0.0623183	-0.133276	0.267734	0.219539	0.0145303	rs560018~rs3819350~rs2479390
Alanine Aminotransferase	chr1:109690366:109690454:clu_53830:ENSG00000134184.12	Adipose_Subcutaneous	1:110232983:CS1	0.961744	0.0623183	-0.133989	0.271972	0.197736	0.0128092	rs560018~rs3819350~rs2479390
Alanine Aminotransferase	chr1:109690366:109690454:clu_55468:ENSG00000134184.12	Nerve_Tibial	1:110232983:CS1	0.961744	0.0623183	-0.123173	0.263507	0.174872	0.0113309	rs560018~rs3819350~rs2479390
Alanine Aminotransferase	chr1:109690564:109693206:clu_42281:ENSG00000134184.12	Whole_Blood	1:110232983:CS1	0.961744	0.0623183	0.0419697	0.176034	0.0518819	0.0031023	rs560018~rs3819350
Alanine Aminotransferase	chr1:109690564:109693206:clu_43491:ENSG00000134184.12	Fibroblasts	1:110232983:CS1	0.961744	0.0623183	0.107869	0.251767	0.146249	0.00935094	rs560018~rs3819350~rs2479390
Alanine Aminotransferase	chr1:109690564:109693206:clu_53830:ENSG00000134184.12	Adipose_Subcutaneous	1:110232983:CS1	0.961744	0.0623183	0.115679	0.259756	0.171465	0.0111947	rs560018~rs3819350~rs2479390
Alanine Aminotransferase	WDR77	Whole_Blood	1:111707297:CS1	0.969073	0.0442421	-0.34626	0.774115	0.16011	0.0073691	rs1335645
Alanine Aminotransferase	chr1:111120693:111124742:clu_47822:ENSG00000156171.14	Muscle_Skeletal	1:111707297:CS1	0.969073	0.0442421	-0.42698	1.00927	0.16011	0.0073691	rs1335645
Alanine Aminotransferase	chr1:111120693:111126227:clu_49053:ENSG00000156171.14	Esophagus_Muscularis	1:111707297:CS1	0.969073	0.0442421	0.0815996	0.274522	0.079595	0.00347546	rs1282128~rs1335645
Alanine Aminotransferase	chr1:111120693:111126227:clu_49821:ENSG00000156171.14	Artery_Tibial	1:111707297:CS1	0.969073	0.0442421	0.128577	0.291012	0.16011	0.0073691	rs1335645
Alanine Aminotransferase	chr1:111120693:111126227:clu_53871:ENSG00000156171.14	Adipose_Subcutaneous	1:111707297:CS1	0.969073	0.0442421	0.158934	0.354435	0.16011	0.0073691	rs1335645
Alanine Aminotransferase	chr1:111120693:111126227:clu_57643:ENSG00000156171.14	Thyroid	1:111707297:CS1	0.969073	0.0442421	0.147035	0.485129	0.0889264	0.00392112	rs1282128~rs1335645
Alanine Aminotransferase	chr1:111124881:111126227:clu_49821:ENSG00000156171.14	Artery_Tibial	1:111707297:CS1	0.969073	0.0442421	-0.236437	0.586176	0.16011	0.0073691	rs1335645
Alanine Aminotransferase	chr1:111489024:111489702:clu_42339:ENSG00000121933.18	Whole_Blood	1:111707297:CS2	0.982548	0.0417181	-1.01637	0.269212	0.982548	0.0417181	rs2262952
Alanine Aminotransferase	chr1:150510182:150510876:clu_47561:ENSG00000143369.14	Heart_Atrial_Appendage	1:150935811:CS1	0.989478	0.121237	1.40712	0.261696	0.989478	0.121237	rs1694347~rs11205387
Alanine Aminotransferase	chr1:150338326:150340403:clu_56027:ENSG00000117360.12	Nerve_Tibial	1:150935811:CS2	0.992436	0.0920094	-3.57299	3.72335	0.496218	0.0460047	rs11577446
Alanine Aminotransferase	chr1:150577491:150578244:clu_50331:ENSG00000143384.12	Artery_Tibial	1:150935811:CS2	0.992436	0.0920094	-3.14757	3.28216	0.496218	0.0460047	rs11577446
Alanine Aminotransferase	EFNA1	Brain_Cerebellum	1:155106697:CS1	0.968836	0.256247	0.116561	0.628471	0.0293587	0.00776505	rs9297
Alanine Aminotransferase	EFNA1	Esophagus_Muscularis	1:155106697:CS1	0.968836	0.256247	0.141834	0.733362	0.0293587	0.00776505	rs9297
Alanine Aminotransferase	EFNA1	Heart_Left_Ventricle	1:155106697:CS1	0.968836	0.256247	0.109611	0.562994	0.0293587	0.00776505	rs9297
Alanine Aminotransferase	EFNA1	Lung	1:155106697:CS1	0.968836	0.256247	0.0992332	0.625596	0.0293587	0.00776505	rs9297
Alanine Aminotransferase	IL6R	Kidney_Tube	1:155106697:CS1	0.968836	0.256247	0.267726	1.37124	0.0293587	0.00776505	rs9297
Alanine Aminotransferase	SLC50A1	Esophagus_Mucosa	1:155106697:CS1	0.968836	0.256247	-0.0690425	0.364241	0.0293587	0.00776505	rs9297
Alanine Aminotransferase	SLC50A1	Fibroblasts	1:155106697:CS1	0.968836	0.256247	-0.0619027	0.321569	0.0293587	0.00776505	rs9297
Alanine Aminotransferase	THBS3-AS1	Lung	1:155106697:CS1	0.968836	0.256247	-0.0821814	0.479404	0.0293587	0.00776505	rs9297
Alanine Aminotransferase	chr1:155131634:155133503:clu_42691:ENSG00000169242.11	Heart_Left_Ventricle	1:155106697:CS1	0.968836	0.256247	-0.168654	0.997833	0.0293587	0.00776505	rs9297
Alanine Aminotransferase	chr1:155131634:155133503:clu_50614:ENSG00000169242.11	Artery_Tibial	1:155106697:CS1	0.968836	0.256247	-0.110336	0.518597	0.0293587	0.00776505	rs9297
Alanine Aminotransferase	chr1:155131634:155133503:clu_52116:ENSG00000169242.11	Colon_Transverse	1:155106697:CS1	0.968836	0.256247	-0.142804	0.942614	0.0293587	0.00776505	rs9297
Alanine Aminotransferase	chr1:155131634:155133503:clu_53198:ENSG00000169242.11	Adipose_Visceral	1:155106697:CS1	0.968836	0.256247	-0.0608923	0.384073	0.0293587	0.00776505	rs9297
Alanine Aminotransferase	chr1:155131634:155133503:clu_54689:ENSG00000169242.11	Adipose_Subcutaneous	1:155106697:CS1	0.968836	0.256247	-0.0499348	0.279653	0.0293587	0.00776505	rs9297
Alanine Aminotransferase	chr1:155131634:155133503:clu_56357:ENSG00000169242.11	Nerve_Tibial	1:155106697:CS1	0.968836	0.256247	-0.0512121	0.26265	0.0293587	0.00776505	rs9297
Alanine Aminotransferase	chr1:155131634:155133503:clu_58071:ENSG00000169242.11	Lung	1:155106697:CS1	0.968836	0.256247	-0.0629025	0.389954	0.0293587	0.00776505	rs9297
Alanine Aminotransferase	chr1:155131634:155133730:clu_41498:ENSG00000169242.11	Pancreas	1:155106697:CS1	0.968836	0.256247	0.0746036	0.474624	0.0293587	0.00776505	rs9297
Alanine Aminotransferase	chr1:155131634:155133730:clu_42481:ENSG00000169242.11	Adrenal_Gland	1:155106697:CS1	0.968836	0.256247	0.0948842	0.581647	0.0293587	0.00776505	rs9297
Alanine Aminotransferase	chr1:155131634:155133730:clu_46226:ENSG00000169242.11	Brain_Cerebellum	1:155106697:CS1	0.968836	0.256247	0.0829008	0.458371	0.0293587	0.00776505	rs9297
Alanine Aminotransferase	chr1:155131634:155133730:clu_47124:ENSG00000169242.11	Esophagus_Junction	1:155106697:CS1	0.968836	0.256247	0.0665534	0.465782	0.0293587	0.00776505	rs9297
Alanine Aminotransferase	chr1:155131634:155133730:clu_48107:ENSG00000169242.11	Colon_Sigmoid	1:155106697:CS1	0.968836	0.256247	0.0602883	0.428253	0.0293587	0.00776505	rs9297
Alanine Aminotransferase	chr1:155131634:155133730:clu_48228:ENSG00000169242.11	Artery_Aorta	1:155106697:CS1	0.968836	0.256247	0.0599299	0.391947	0.0293587	0.00776505	rs9297
Alanine Aminotransferase	chr1:155131634:155133730:clu_50169:ENSG00000169242.11	Esophagus_Mucosa	1:155106697:CS1	0.968836	0.256247	0.0469938	0.302582	0.0293587	0.00776505	rs9297
Alanine Aminotransferase	chr1:155131634:155133730:clu_51816:ENSG00000169242.11	Pituitary	1:155106697:CS1	0.968836	0.256247	0.0769558	0.458211	0.0293587	0.00776505	rs9297
Alanine Aminotransferase	chr1:155131634:155133730:clu_52116:ENSG00000169242.11	Colon_Transverse	1:155106697:CS1	0.968836	0.256247	0.0580454	0.26255	0.0293587	0.00776505	rs9297
Alanine Aminotransferase	chr1:155133568:155133730:clu_42691:ENSG00000169242.11	Heart_Left_Ventricle	1:155106697:CS1	0.968836	0.256247	-0.156743	0.851057	0.0293587	0.00776505	rs9297
Alanine Aminotransferase	chr1:155133568:155133730:clu_47124:ENSG00000169242.11	Esophagus_Junction	1:155106697:CS1	0.968836	0.256247	-0.139648	0.879155	0.0293587	0.00776505	rs9297
Alanine Aminotransferase	chr1:155133568:155133730:clu_47850:ENSG00000169242.11	Heart_Atrial_Appendage	1:155106697:CS1	0.968836	0.256247	-0.068069	0.316448	0.0293587	0.00776505	rs9297
Alanine Aminotransferase	chr1:155133568:155133730:clu_48228:ENSG00000169242.11	Artery_Aorta	1:155106697:CS1	0.968836	0.256247	-0.104713	0.656239	0.0293587	0.00776505	rs9297
Alanine Aminotransferase	chr1:155133568:155133730:clu_49815:ENSG00000169242.11	Esophagus_Muscularis	1:155106697:CS1	0.968836	0.256247	-0.079927	0.420635	0.0293587	0.00776505	rs9297
Alanine Aminotransferase	chr1:155133568:155133730:clu_50169:ENSG00000169242.11	Esophagus_Mucosa	1:155106697:CS1	0.968836	0.256247	-0.067472	0.356237	0.0293587	0.00776505	rs9297
Alanine Aminotransferase	chr1:155133568:155133730:clu_50614:ENSG00000169242.11	Artery_Tibial	1:155106697:CS1	0.968836	0.256247	-0.0750435	0.385823	0.0293587	0.00776505	rs9297
Alanine Aminotransferase	chr1:155133568:155133730:clu_58071:ENSG00000169242.11	Lung	1:155106697:CS1	0.968836	0.256247	-0.051612	0.306944	0.0293587	0.00776505	rs9297
Alanine Aminotransferase	chr1:155133568:155133730:clu_58533:ENSG00000169242.11	Thyroid	1:155106697:CS1	0.968836	0.256247	-0.0576766	0.325442	0.0293587	0.00776505	rs9297
Alanine Aminotransferase	FLAD1	Thyroid	1:155106697:CS2	0.980991	0.0404794	-0.058752	0.244025	0.0576164	0.002286	rs11590058
Alanine Aminotransferase	SHC1	Fibroblasts	1:155106697:CS2	0.980991	0.0404794	0.17581	0.680333	0.0576164	0.002286	rs11590058
Alanine Aminotransferase	SHC1	Whole_Blood	1:155106697:CS2	0.980991	0.0404794	-0.0390695	0.145519	0.0576164	0.002286	rs11590058
Alanine Aminotransferase	chr1:154970199:154974248:clu_42992:ENSG00000160691.18	Whole_Blood	1:155106697:CS2	0.980991	0.0404794	0.075081	0.33551	0.0576164	0.002286	rs11590058
Alanine Aminotransferase	chr1:154974045:154974248:clu_42992:ENSG00000160691.18	Whole_Blood	1:155106697:CS2	0.980991	0.0404794	-0.105831	0.412249	0.0576164	0.002286	rs11590058
Alanine Aminotransferase	chr1:154974045:154974248:clu_47402:ENSG00000160691.18	Stomach	1:155106697:CS2	0.980991	0.0404794	-0.21148	0.893534	0.0576164	0.002286	rs11590058
Alanine Aminotransferase	chr1:154974045:154974248:clu_50142:ENSG00000160691.18	Esophagus_Mucosa	1:155106697:CS2	0.980991	0.0404794	-0.38527	1.70389	0.0576164	0.002286	rs11590058
Alanine Aminotransferase	chr1:154974045:154974248:clu_52090:ENSG00000160691.18	Colon_Transverse	1:155106697:CS2	0.980991	0.0404794	-0.0683699	0.271912	0.0576164	0.002286	rs11590058
Alanine Aminotransferase	chr1:154974045:154974248:clu_54665:ENSG00000160691.18	Adipose_Subcutaneous	1:155106697:CS2	0.980991	0.0404794	-0.0920648	0.377257	0.0576164	0.002286	rs11590058
Alanine Aminotransferase	chr1:154974045:154974248:clu_58051:ENSG00000160691.18	Lung	1:155106697:CS2	0.980991	0.0404794	-0.252838	0.466733	0.230152	0.0102684	rs74116247~rs11590058
Alanine Aminotransferase	chr1:154974045:154974248:clu_58505:ENSG00000160691.18	Thyroid	1:155106697:CS2	0.980991	0.0404794	-0.0951642	0.378053	0.0576164	0.002286	rs11590058
Alanine Aminotransferase	chr1:154990528:154992565:clu_54667:ENSG00000160688.18	Adipose_Subcutaneous	1:155106697:CS2	0.980991	0.0404794	-0.163414	0.721713	0.0576164	0.002286	rs11590058
Alanine Aminotransferase	chr1:155748531:155748648:clu_51917:ENSG00000203761.5	Pituitary	1:155106697:CS2	0.980991	0.0404794	-0.307175	0.909967	0.117058	0.00506503	rs74116247~rs11590058
Alanine Aminotransferase	MEF2D	Artery_Tibial	1:156461707:CS1	0.959324	0.065971	-0.0333862	0.195247	0.0399718	0.00274879	rs2274316
Alanine Aminotransferase	MEF2D	Muscle_Skeletal	1:156461707:CS1	0.959324	0.065971	-0.0467253	0.248128	0.0399718	0.00274879	rs2274316
Alanine Aminotransferase	MEF2D	Nerve_Tibial	1:156461707:CS1	0.959324	0.065971	-0.0542972	0.283163	0.0399718	0.00274879	rs2274316
Alanine Aminotransferase	chr1:156475237:156476494:clu_48024:ENSG00000116604.17	Heart_Atrial_Appendage	1:156461707:CS1	0.959324	0.065971	0.195596	1.13561	0.0399718	0.00274879	rs2274316
Alanine Aminotransferase	chr1:156475237:156477012:clu_48024:ENSG00000116604.17	Heart_Atrial_Appendage	1:156461707:CS1	0.959324	0.065971	-0.0920874	0.485346	0.0399718	0.00274879	rs2274316
Alanine Aminotransferase	chr1:156475237:156477012:clu_50356:ENSG00000116604.17	Esophagus_Mucosa	1:156461707:CS1	0.959324	0.065971	0.144517	0.581354	0.0399718	0.00274879	rs2274316
Alanine Aminotransferase	chr1:156475237:156477012:clu_50786:ENSG00000116604.17	Artery_Tibial	1:156461707:CS1	0.959324	0.065971	-0.069129	0.365472	0.0399718	0.00274879	rs2274316
Alanine Aminotransferase	chr1:156476514:156477012:clu_48024:ENSG00000116604.17	Heart_Atrial_Appendage	1:156461707:CS1	0.959324	0.065971	0.26964	1.15932	0.0399718	0.00274879	rs2274316
Alanine Aminotransferase	chr1:156476514:156477012:clu_50786:ENSG00000116604.17	Artery_Tibial	1:156461707:CS1	0.959324	0.065971	0.0440867	0.226959	0.0399718	0.00274879	rs2274316
Alanine Aminotransferase	chr1:156479796:156480643:clu_42852:ENSG00000116604.17	Heart_Left_Ventricle	1:156461707:CS1	0.959324	0.065971	0.0427259	0.221045	0.0399718	0.00274879	rs2274316
Alanine Aminotransferase	chr1:156479796:156480643:clu_48691:ENSG00000116604.17	Muscle_Skeletal	1:156461707:CS1	0.959324	0.065971	0.025765	0.137642	0.0399718	0.00274879	rs2274316
Alanine Aminotransferase	chr1:156479796:156480834:clu_48691:ENSG00000116604.17	Muscle_Skeletal	1:156461707:CS1	0.959324	0.065971	-0.025601	0.144546	0.0399718	0.00274879	rs2274316
Alanine Aminotransferase	chr1:156479796:156482437:clu_42852:ENSG00000116604.17	Heart_Left_Ventricle	1:156461707:CS1	0.959324	0.065971	0.0492108	0.245774	0.0399718	0.00274879	rs2274316
Alanine Aminotransferase	chr1:156479796:156482437:clu_47301:ENSG00000116604.17	Esophagus_Junction	1:156461707:CS1	0.959324	0.065971	0.0499004	0.260523	0.0399718	0.00274879	rs2274316
Alanine Aminotransferase	chr1:156479796:156482437:clu_48025:ENSG00000116604.17	Heart_Atrial_Appendage	1:156461707:CS1	0.959324	0.065971	0.0497931	0.287365	0.0399718	0.00274879	rs2274316
Alanine Aminotransferase	chr1:156479796:156482437:clu_48293:ENSG00000116604.17	Colon_Sigmoid	1:156461707:CS1	0.959324	0.065971	0.0634172	0.323786	0.0399718	0.00274879	rs2274316
Alanine Aminotransferase	chr1:156479796:156482437:clu_49997:ENSG00000116604.17	Esophagus_Muscularis	1:156461707:CS1	0.959324	0.065971	0.0531855	0.243111	0.0399718	0.00274879	rs2274316
Alanine Aminotransferase	chr1:156479796:156482437:clu_50787:ENSG00000116604.17	Artery_Tibial	1:156461707:CS1	0.959324	0.065971	0.0303601	0.11004	0.0399718	0.00274879	rs2274316
Alanine Aminotransferase	chr1:156480777:156482437:clu_48025:ENSG00000116604.17	Heart_Atrial_Appendage	1:156461707:CS1	0.959324	0.065971	0.0928821	0.379278	0.0399718	0.00274879	rs2274316
Alanine Aminotransferase	chr1:156480777:156482437:clu_48692:ENSG00000116604.17	Muscle_Skeletal	1:156461707:CS1	0.959324	0.065971	0.0236607	0.12255	0.0399718	0.00274879	rs2274316
Alanine Aminotransferase	chr1:156480971:156482437:clu_42852:ENSG00000116604.17	Heart_Left_Ventricle	1:156461707:CS1	0.959324	0.065971	-0.0454283	0.189182	0.0399718	0.00274879	rs2274316
Alanine Aminotransferase	chr1:156480971:156482437:clu_48692:ENSG00000116604.17	Muscle_Skeletal	1:156461707:CS1	0.959324	0.065971	-0.0235478	0.125797	0.0399718	0.00274879	rs2274316
Alanine Aminotransferase	chr1:156483418:156500486:clu_48693:ENSG00000116604.17	Muscle_Skeletal	1:156461707:CS1	0.959324	0.065971	-0.212247	0.900744	0.0399718	0.00274879	rs2274316
Alanine Aminotransferase	chr1:156483430:156500486:clu_48693:ENSG00000116604.17	Muscle_Skeletal	1:156461707:CS1	0.959324	0.065971	0.0610099	0.334213	0.0399718	0.00274879	rs2274316
Alanine Aminotransferase	ADAM15	Adipose_Visceral	1:156461707:CS2	0.960765	0.0472937	-0.248096	0.726055	0.107169	0.00527323	rs149253716
Alanine Aminotransferase	EFNA3	Esophagus_Mucosa	1:156461707:CS2	0.960765	0.0472937	-0.945179	2.94016	0.107169	0.00527323	rs149253716
Alanine Aminotransferase	chr1:155061489:155062245:clu_53192:ENSG00000143537.13	Adipose_Visceral	1:156461707:CS2	0.960765	0.0472937	-0.398343	1.23868	0.107169	0.00527323	rs149253716
Alanine Aminotransferase	chr1:155062117:155062245:clu_48519:ENSG00000143537.13	Muscle_Skeletal	1:156461707:CS2	0.960765	0.0472937	0.187383	0.542287	0.103414	0.00510783	rs149253716~rs184021977
Alanine Aminotransferase	chr1:155343486:155343604:clu_58613:ENSG00000116539.12	Thyroid	1:156461707:CS2	0.960765	0.0472937	-0.694047	2.03388	0.107169	0.00527323	rs149253716
Alanine Aminotransferase	chr1:155732033:155736946:clu_43109:ENSG00000132676.15	Whole_Blood	1:156461707:CS2	0.960765	0.0472937	0.176556	0.48483	0.107169	0.00527323	rs149253716
Alanine Aminotransferase	chr1:155737063:155738157:clu_43109:ENSG00000132676.15	Whole_Blood	1:156461707:CS2	0.960765	0.0472937	-0.169907	0.514498	0.107169	0.00527323	rs149253716
Alanine Aminotransferase	chr1:155985449:155989234:clu_53335:ENSG00000116584.17	Adipose_Visceral	1:156461707:CS2	0.960765	0.0472937	0.341925	0.954968	0.107169	0.00527323	rs149253716
Alanine Aminotransferase	chr1:156294565:156294759:clu_43087:ENSG00000198715.11	Brain_Cortex	1:156461707:CS2	0.960765	0.0472937	0.387088	1.15635	0.107169	0.00527323	rs149253716
Alanine Aminotransferase	GBAP1	Adipose_Subcutaneous	1:156461707:CS3	0.951074	0.06157	0.00536647	0.0478543	0.00688276	0.000369742	rs141380234~rs12134456
Alanine Aminotransferase	GBAP1	Esophagus_Muscularis	1:156461707:CS3	0.951074	0.06157	0.00181245	0.047456	0.00242277	0.000122449	rs12407219~rs12134456
Alanine Aminotransferase	GBAP1	Lung	1:156461707:CS3	0.951074	0.06157	0.00172018	0	0.00241175	0.000122206	rs12407219~rs12134456
Alanine Aminotransferase	GBAP1	Thyroid	1:156461707:CS3	0.951074	0.06157	0.00167667	0.0527325	0.00241901	0.000122477	rs12407219~rs12134456
Alanine Aminotransferase	chr1:155131634:155133730:clu_50169:ENSG00000169242.11	Esophagus_Mucosa	1:156461707:CS3	0.951074	0.06157	0.00319145	0	0.00333855	0.000182466	rs184104770~rs12134456~rs708612
Alanine Aminotransferase	chr1:155131634:155133730:clu_54689:ENSG00000169242.11	Adipose_Subcutaneous	1:156461707:CS3	0.951074	0.06157	0.0055257	0.11284	0.00695399	0.000381956	rs12134456~rs708612~rs6697355
Alanine Aminotransferase	chr1:155133568:155133730:clu_58071:ENSG00000169242.11	Lung	1:156461707:CS3	0.951074	0.06157	-0.0101977	0.111978	0.0108868	0.000615593	rs12407219~rs12134456~rs6697355
Alanine Aminotransferase	chr1:155192247:155192786:clu_56371:ENSG00000185499.16	Nerve_Tibial	1:156461707:CS3	0.951074	0.06157	0.00183335	0	0.00242264	0.000122433	rs12407219~rs12134456
Alanine Aminotransferase	chr1:155192274:155192786:clu_56371:ENSG00000185499.16	Nerve_Tibial	1:156461707:CS3	0.951074	0.06157	-0.0504577	0.198164	0.0626056	0.003987	rs141380234~rs12134456~rs6697355
Alanine Aminotransferase	chr1:155192274:155192786:clu_58088:ENSG00000185499.16	Lung	1:156461707:CS3	0.951074	0.06157	-0.117664	0.279902	0.14849	0.0101056	rs141380234~rs12134456~rs6697355
Alanine Aminotransferase	chr1:155192283:155192786:clu_41517:ENSG00000185499.16	Pancreas	1:156461707:CS3	0.951074	0.06157	-0.00203879	0	0.00241738	0.000121988	rs12407219~rs12134456
Alanine Aminotransferase	chr1:155192283:155192786:clu_47136:ENSG00000185499.16	Esophagus_Junction	1:156461707:CS3	0.951074	0.06157	-0.00187811	0	0.00236849	0.000120214	rs12407219~rs12134456
Alanine Aminotransferase	chr1:155192283:155192786:clu_47439:ENSG00000185499.16	Stomach	1:156461707:CS3	0.951074	0.06157	-0.0206537	0.125593	0.0233571	0.00139808	rs141380234~rs12407219~rs12134456
Alanine Aminotransferase	chr1:155192283:155192786:clu_47862:ENSG00000185499.16	Heart_Atrial_Appendage	1:156461707:CS3	0.951074	0.06157	-0.0307432	0.1949	0.0316971	0.00192742	rs141380234~rs12134456
Alanine Aminotransferase	chr1:155192283:155192786:clu_48241:ENSG00000185499.16	Artery_Aorta	1:156461707:CS3	0.951074	0.06157	-0.0588467	0.231693	0.0727525	0.0047481	rs141380234~rs12407219~rs12134456
Alanine Aminotransferase	chr1:155192283:155192786:clu_50186:ENSG00000185499.16	Esophagus_Mucosa	1:156461707:CS3	0.951074	0.06157	-0.00154074	0	0.0024174	0.000121989	rs12407219~rs12134456
Alanine Aminotransferase	chr1:155192283:155192786:clu_53211:ENSG00000185499.16	Adipose_Visceral	1:156461707:CS3	0.951074	0.06157	-0.00168317	0.0671436	0.00242011	0.000122197	rs12407219~rs12134456
Alanine Aminotransferase	chr1:155192283:155192786:clu_54702:ENSG00000185499.16	Adipose_Subcutaneous	1:156461707:CS3	0.951074	0.06157	-0.00149309	0.044213	0.00242276	0.000122448	rs12407219~rs12134456
Alanine Aminotransferase	chr1:155192283:155192786:clu_56371:ENSG00000185499.16	Nerve_Tibial	1:156461707:CS3	0.951074	0.06157	-0.0181581	0.0810756	0.0263282	0.00160217	rs141380234~rs12407219~rs12134456
Alanine Aminotransferase	chr1:155192283:155192786:clu_58088:ENSG00000185499.16	Lung	1:156461707:CS3	0.951074	0.06157	-0.0590067	0.162757	0.0854451	0.00562066	rs141380234~rs12134456
Alanine Aminotransferase	chr1:155192283:155192786:clu_58552:ENSG00000185499.16	Thyroid	1:156461707:CS3	0.951074	0.06157	-0.0804939	0.221432	0.115331	0.00775159	1:155369160_TATGTAATCCAAGC_T~rs141380234~rs12134456
Alanine Aminotransferase	chr1:155192310:155192786:clu_41517:ENSG00000185499.16	Pancreas	1:156461707:CS3	0.951074	0.06157	0.00201958	0.0379921	0.0023963	0.00012059	rs12407219~rs12134456
Alanine Aminotransferase	chr1:155192310:155192786:clu_44208:ENSG00000185499.16	Fibroblasts	1:156461707:CS3	0.951074	0.06157	0.00155819	0.0473724	0.00242305	0.000122505	rs12407219~rs12134456
Alanine Aminotransferase	chr1:155192310:155192786:clu_47439:ENSG00000185499.16	Stomach	1:156461707:CS3	0.951074	0.06157	0.0175098	0.138484	0.0199559	0.00118364	rs141380234~rs12407219~rs12134456
Alanine Aminotransferase	chr1:155192310:155192786:clu_48119:ENSG00000185499.16	Colon_Sigmoid	1:156461707:CS3	0.951074	0.06157	0.00197181	0	0.00241449	0.000121781	rs12407219~rs12134456
Alanine Aminotransferase	chr1:155192310:155192786:clu_48241:ENSG00000185499.16	Artery_Aorta	1:156461707:CS3	0.951074	0.06157	0.020283	0.103926	0.0247658	0.00149476	rs141380234~rs12407219~rs12134456
Alanine Aminotransferase	chr1:155192310:155192786:clu_49830:ENSG00000185499.16	Esophagus_Muscularis	1:156461707:CS3	0.951074	0.06157	0.00150722	0	0.00235587	0.000119599	rs12407219~rs12134456
Alanine Aminotransferase	chr1:155192310:155192786:clu_50186:ENSG00000185499.16	Esophagus_Mucosa	1:156461707:CS3	0.951074	0.06157	0.00152444	0.0361329	0.002422	0.00012255	rs12407219~rs12134456
Alanine Aminotransferase	chr1:155192310:155192786:clu_53211:ENSG00000185499.16	Adipose_Visceral	1:156461707:CS3	0.951074	0.06157	0.0177743	0.120949	0.0234059	0.00141555	rs141380234~rs12407219~rs12134456
Alanine Aminotransferase	chr1:155192310:155192786:clu_56371:ENSG00000185499.16	Nerve_Tibial	1:156461707:CS3	0.951074	0.06157	0.0198274	0.114868	0.0281942	0.00171549	rs141380234~rs12407219~rs12134456
Alanine Aminotransferase	chr1:155192310:155192786:clu_58088:ENSG00000185499.16	Lung	1:156461707:CS3	0.951074	0.06157	0.0427436	0.163546	0.0616363	0.00395014	rs141380234~rs12134456
Alanine Aminotransferase	chr1:155192310:155192786:clu_58552:ENSG00000185499.16	Thyroid	1:156461707:CS3	0.951074	0.06157	0.115495	0.278125	0.165312	0.0114147	1:155369160_TATGTAATCCAAGC_T~rs141380234~rs12134456
Alanine Aminotransferase	FCGR2B	Whole_Blood	1:161542235:CS1	1	0.184217	0.960408	0.0848116	1	0.184217	rs61801010~rs554414140~rs143596860
Alanine Aminotransferase	chr1:196673962:196675989:clu_59147:ENSG00000000971.15	Lung	1:196675861:CS1	0.984122	0.254561	0.246327	0.548132	0.147223	0.0385167	rs6695321
Alanine Aminotransferase	chr1:196673962:196675989:clu_59517:ENSG00000000971.15	Thyroid	1:196675861:CS1	0.984122	0.254561	0.544934	1.37146	0.147223	0.0385167	rs6695321
Alanine Aminotransferase	chr1:196675529:196675989:clu_55646:ENSG00000000971.15	Adipose_Subcutaneous	1:196675861:CS1	0.984122	0.254561	-0.0674968	0.222134	0.0403166	0.00960148	rs6695321~rs7544067
Alanine Aminotransferase	chr1:196675529:196675989:clu_59147:ENSG00000000971.15	Lung	1:196675861:CS1	0.984122	0.254561	-0.230526	0.609288	0.147223	0.0385167	rs6695321
Alanine Aminotransferase	chr1:196675529:196675989:clu_59517:ENSG00000000971.15	Thyroid	1:196675861:CS1	0.984122	0.254561	-0.436781	1.11013	0.147223	0.0385167	rs6695321
Alanine Aminotransferase	chr1:196690239:196701318:clu_44972:ENSG00000000971.15	Fibroblasts	1:196675861:CS1	0.984122	0.254561	0.364845	0.790042	0.180357	0.046266	rs6695321~rs200586086
Alanine Aminotransferase	chr1:196690239:196713735:clu_44972:ENSG00000000971.15	Fibroblasts	1:196675861:CS1	0.984122	0.254561	-0.363963	0.823037	0.174558	0.044627	rs6695321~rs200586086
Alanine Aminotransferase	CDK18	Colon_Transverse	1:205023764:CS1	1.00005	0.0668795	0.39632	0.562886	0.333351	0.0222932	rs11240492
Alanine Aminotransferase	chr1:204433425:204433793:clu_53257:ENSG00000133056.13	Colon_Transverse	1:205023764:CS1	1.00005	0.0668795	-0.659467	0.944062	0.333351	0.0222932	rs11240492
Alanine Aminotransferase	chr1:204433949:204434439:clu_53257:ENSG00000133056.13	Colon_Transverse	1:205023764:CS1	1.00005	0.0668795	0.504196	0.754876	0.333351	0.0222932	rs11240492
Alanine Aminotransferase	DSTYK	Adipose_Visceral	1:205023764:CS2	0.995748	0.0565035	-0.30455	0.599653	0.184559	0.0105378	rs11240351
Alanine Aminotransferase	DSTYK	Artery_Aorta	1:205023764:CS2	0.995748	0.0565035	-0.204121	0.434231	0.184559	0.0105378	rs11240351
Alanine Aminotransferase	DSTYK	Colon_Sigmoid	1:205023764:CS2	0.995748	0.0565035	-0.182636	0.412788	0.184559	0.0105378	rs11240351
Alanine Aminotransferase	DSTYK	Esophagus_Muscularis	1:205023764:CS2	0.995748	0.0565035	-0.15893	0.352956	0.184559	0.0105378	rs11240351
Alanine Aminotransferase	DSTYK	Fibroblasts	1:205023764:CS2	0.995748	0.0565035	-0.205729	0.420484	0.184559	0.0105378	rs11240351
Alanine Aminotransferase	DSTYK	Thyroid	1:205023764:CS2	0.995748	0.0565035	-0.0968907	0.385528	0.0729554	0.00381451	rs11240351~rs1172130
Alanine Aminotransferase	chr1:204241814:204244864:clu_50888:ENSG00000143850.13	Esophagus_Muscularis	1:205023764:CS3	0.955039	0.0449161	1.92504	0.6012	0.955039	0.0449161	rs12031222
Alanine Aminotransferase	SLC30A1	Kidney_Tube	1:211752883:CS1	0.993127	0.0882131	-1.1936	0.256703	0.993127	0.0882131	rs7526700
Alanine Aminotransferase	HLX-AS1	Artery_Coronary	1:219668252:CS1	0.994011	0.140738	7.67867	1.09417	0.994011	0.140738	rs7552531~rs12120994
Alanine Aminotransferase	chr1:246842776:246849615:clu_37167:ENSG00000153207.14	Liver	1:247602968:CS1	0.992281	0.118769	6.43812	0.991995	0.992281	0.118769	rs4925546
Alanine Aminotransferase	ABCG5	Colon_Transverse	2:44069772:CS1	1	0.104174	3.58052	3.70778	0.5	0.0520869	rs4299376
Alanine Aminotransferase	ABCG8	Colon_Transverse	2:44069772:CS1	1	0.104174	0.556135	0.560912	0.5	0.0520869	rs4299376
Alanine Aminotransferase	ABCG5	Spleen	2:44069772:CS2	0.999999	0.111363	0.490575	0.715625	0.333333	0.0371211	rs56266464
Alanine Aminotransferase	ABCG8	Spleen	2:44069772:CS2	0.999999	0.111363	1.05414	1.48664	0.333333	0.0371211	rs56266464
Alanine Aminotransferase	chr2:43293213:43320446:clu_41838:ENSG00000115970.18	Muscle_Skeletal	2:44069772:CS2	0.999999	0.111363	-0.793096	1.1323	0.333333	0.0371211	rs56266464
Alanine Aminotransferase	FOXN2	Adipose_Subcutaneous	2:48541044:CS1	0.963512	0.0727144	0.0199645	0.0861236	0.0312166	0.00235661	rs79073127
Alanine Aminotransferase	FOXN2	Adipose_Visceral	2:48541044:CS1	0.963512	0.0727144	0.0211017	0.133977	0.0312166	0.00235661	rs79073127
Alanine Aminotransferase	FOXN2	Adrenal_Gland	2:48541044:CS1	0.963512	0.0727144	0.0250942	0.0897121	0.0312166	0.00235661	rs79073127
Alanine Aminotransferase	FOXN2	Artery_Aorta	2:48541044:CS1	0.963512	0.0727144	0.0230155	0.14466	0.0312166	0.00235661	rs79073127
Alanine Aminotransferase	FOXN2	Artery_Coronary	2:48541044:CS1	0.963512	0.0727144	0.0317596	0.188277	0.0312166	0.00235661	rs79073127
Alanine Aminotransferase	FOXN2	Artery_Tibial	2:48541044:CS1	0.963512	0.0727144	0.0211948	0.117509	0.0312166	0.00235661	rs79073127
Alanine Aminotransferase	FOXN2	Colon_Sigmoid	2:48541044:CS1	0.963512	0.0727144	0.0230225	0.136129	0.0312166	0.00235661	rs79073127
Alanine Aminotransferase	FOXN2	Colon_Transverse	2:48541044:CS1	0.963512	0.0727144	0.0201054	0.110904	0.0312166	0.00235661	rs79073127
Alanine Aminotransferase	FOXN2	Esophagus_Junction	2:48541044:CS1	0.963512	0.0727144	0.0222172	0.15653	0.0312166	0.00235661	rs79073127
Alanine Aminotransferase	FOXN2	Esophagus_Mucosa	2:48541044:CS1	0.963512	0.0727144	0.0189093	0.1183	0.0312166	0.00235661	rs79073127
Alanine Aminotransferase	FOXN2	Esophagus_Muscularis	2:48541044:CS1	0.963512	0.0727144	0.0188644	0.121475	0.0312166	0.00235661	rs79073127
Alanine Aminotransferase	FOXN2	Heart_Atrial_Appendage	2:48541044:CS1	0.963512	0.0727144	0.0215863	0.136948	0.0312166	0.00235661	rs79073127
Alanine Aminotransferase	FOXN2	Heart_Left_Ventricle	2:48541044:CS1	0.963512	0.0727144	0.0224307	0.135059	0.0312166	0.00235661	rs79073127
Alanine Aminotransferase	FOXN2	Liver	2:48541044:CS1	0.963512	0.0727144	0.0302044	0.159195	0.0312166	0.00235661	rs79073127
Alanine Aminotransferase	FOXN2	Lung	2:48541044:CS1	0.963512	0.0727144	0.0145814	0.0891738	0.0289398	0.00217216	rs79073127~rs551275655
Alanine Aminotransferase	FOXN2	Lymphocytes	2:48541044:CS1	0.963512	0.0727144	0.0541051	0.363498	0.0312166	0.00235661	rs79073127
Alanine Aminotransferase	FOXN2	Nerve_Tibial	2:48541044:CS1	0.963512	0.0727144	0.0155029	0.0849214	0.0312166	0.00235661	rs79073127
Alanine Aminotransferase	FOXN2	Pancreas	2:48541044:CS1	0.963512	0.0727144	0.0218797	0.125934	0.0312166	0.00235661	rs79073127
Alanine Aminotransferase	FOXN2	Pituitary	2:48541044:CS1	0.963512	0.0727144	0.0217734	0.122143	0.0312166	0.00235661	rs79073127
Alanine Aminotransferase	FOXN2	Small_Intestine	2:48541044:CS1	0.963512	0.0727144	0.0319892	0.168487	0.0312166	0.00235661	rs79073127
Alanine Aminotransferase	FOXN2	Spleen	2:48541044:CS1	0.963512	0.0727144	0.0238142	0.128715	0.0312166	0.00235661	rs79073127
Alanine Aminotransferase	FOXN2	Stomach	2:48541044:CS1	0.963512	0.0727144	0.0228052	0.129012	0.0312166	0.00235661	rs79073127
Alanine Aminotransferase	FOXN2	Thyroid	2:48541044:CS1	0.963512	0.0727144	0.0162003	0.0710103	0.0312166	0.00235661	rs79073127
Alanine Aminotransferase	FOXN2	Whole_Blood	2:48541044:CS1	0.963512	0.0727144	0.0171042	0.105086	0.0292905	0.00220058	rs79073127~rs551275655
Alanine Aminotransferase	chr2:48346751:48359047:clu_38093:ENSG00000170802.15	Fibroblasts	2:48541044:CS1	0.963512	0.0727144	-0.02779	0.159784	0.0312166	0.00235661	rs79073127
Alanine Aminotransferase	chr2:48346751:48359047:clu_45959:ENSG00000170802.15	Adipose_Visceral	2:48541044:CS1	0.963512	0.0727144	-0.0308991	0.168646	0.0312166	0.00235661	rs79073127
Alanine Aminotransferase	chr2:48346751:48359047:clu_47285:ENSG00000170802.15	Adipose_Subcutaneous	2:48541044:CS1	0.963512	0.0727144	-0.0396585	0.231854	0.0312166	0.00235661	rs79073127
Alanine Aminotransferase	chr2:48346751:48359047:clu_48646:ENSG00000170802.15	Nerve_Tibial	2:48541044:CS1	0.963512	0.0727144	-0.023421	0.136078	0.0312166	0.00235661	rs79073127
Alanine Aminotransferase	chr2:48346751:48359047:clu_50206:ENSG00000170802.15	Lung	2:48541044:CS1	0.963512	0.0727144	-0.0281855	0.178587	0.0312166	0.00235661	rs79073127
Alanine Aminotransferase	chr2:48346751:48359047:clu_50510:ENSG00000170802.15	Thyroid	2:48541044:CS1	0.963512	0.0727144	-0.0530367	0.220611	0.0312166	0.00235661	rs79073127
Alanine Aminotransferase	chr2:48362707:48373292:clu_48646:ENSG00000170802.15	Nerve_Tibial	2:48541044:CS1	0.963512	0.0727144	0.0729141	0.447507	0.0312166	0.00235661	rs79073127
Alanine Aminotransferase	EIF3FP3	Lymphocytes	2:59313974:CS1	0.999871	0.46576	-7.94712	8.18532	0.499936	0.23288	rs7424120
Alanine Aminotransferase	chr2:58165874:58198594:clu_46083:ENSG00000115392.11	Adipose_Visceral	2:59313974:CS1	0.999871	0.46576	6.90651	7.03572	0.499936	0.23288	rs7424120
Alanine Aminotransferase	CEP68	Adipose_Subcutaneous	2:65291546:CS1	0.968818	0.0886808	0.0309787	0.12432	0.0542957	0.00504451	rs113756095~rs1009358
Alanine Aminotransferase	CEP68	Adipose_Visceral	2:65291546:CS1	0.968818	0.0886808	0.0272438	0.149248	0.0435487	0.00398268	rs1009358
Alanine Aminotransferase	CEP68	Adrenal_Gland	2:65291546:CS1	0.968818	0.0886808	0.0406885	0.228792	0.0435487	0.00398268	rs1009358
Alanine Aminotransferase	CEP68	Artery_Aorta	2:65291546:CS1	0.968818	0.0886808	0.030062	0.158043	0.0435487	0.00398268	rs1009358
Alanine Aminotransferase	CEP68	Artery_Coronary	2:65291546:CS1	0.968818	0.0886808	0.0491482	0.252332	0.0435487	0.00398268	rs1009358
Alanine Aminotransferase	CEP68	Artery_Tibial	2:65291546:CS1	0.968818	0.0886808	0.0220508	0.101452	0.0435487	0.00398268	rs1009358
Alanine Aminotransferase	CEP68	Colon_Sigmoid	2:65291546:CS1	0.968818	0.0886808	0.0293955	0.150605	0.0435487	0.00398268	rs1009358
Alanine Aminotransferase	CEP68	Colon_Transverse	2:65291546:CS1	0.968818	0.0886808	0.037883	0.16272	0.0435487	0.00398268	rs1009358
Alanine Aminotransferase	CEP68	Esophagus_Junction	2:65291546:CS1	0.968818	0.0886808	0.0302315	0.140162	0.0435487	0.00398268	rs1009358
Alanine Aminotransferase	CEP68	Esophagus_Muscularis	2:65291546:CS1	0.968818	0.0886808	0.0238287	0.106363	0.0435487	0.00398268	rs1009358
Alanine Aminotransferase	CEP68	Fibroblasts	2:65291546:CS1	0.968818	0.0886808	0.0267636	0.111171	0.0435487	0.00398268	rs1009358
Alanine Aminotransferase	CEP68	Heart_Atrial_Appendage	2:65291546:CS1	0.968818	0.0886808	0.0269385	0.129322	0.0435487	0.00398268	rs1009358
Alanine Aminotransferase	CEP68	Heart_Left_Ventricle	2:65291546:CS1	0.968818	0.0886808	0.0295929	0.14718	0.0435487	0.00398268	rs1009358
Alanine Aminotransferase	CEP68	Kidney_Glom	2:65291546:CS1	0.968818	0.0886808	0.0400576	0.170538	0.0435487	0.00398268	rs1009358
Alanine Aminotransferase	CEP68	Kidney_Tube	2:65291546:CS1	0.968818	0.0886808	0.0529908	0.282467	0.0435487	0.00398268	rs1009358
Alanine Aminotransferase	CEP68	Liver	2:65291546:CS1	0.968818	0.0886808	0.135796	0.623206	0.0435487	0.00398268	rs1009358
Alanine Aminotransferase	CEP68	Lung	2:65291546:CS1	0.968818	0.0886808	0.0331701	0.162704	0.0435487	0.00398268	rs1009358
Alanine Aminotransferase	CEP68	Muscle_Skeletal	2:65291546:CS1	0.968818	0.0886808	0.0248328	0.124947	0.0435487	0.00398268	rs1009358
Alanine Aminotransferase	CEP68	Pancreas	2:65291546:CS1	0.968818	0.0886808	0.0406201	0.17091	0.0435487	0.00398268	rs1009358
Alanine Aminotransferase	CEP68	Stomach	2:65291546:CS1	0.968818	0.0886808	0.0423672	0.165697	0.0435487	0.00398268	rs1009358
Alanine Aminotransferase	CEP68	Thyroid	2:65291546:CS1	0.968818	0.0886808	0.0321236	0.148376	0.0435487	0.00398268	rs1009358
Alanine Aminotransferase	RAB1A	Artery_Tibial	2:65291546:CS1	0.968818	0.0886808	0.0757541	0.365407	0.0435487	0.00398268	rs1009358
Alanine Aminotransferase	COBLL1	Brain_Cerebellum	2:165528876:CS1	0.987943	0.189044	-0.636204	1.20805	0.197589	0.0378088	rs355838
Alanine Aminotransferase	COBLL1	Brain_Cortex	2:165528876:CS1	0.987943	0.189044	-0.537379	1.10615	0.197589	0.0378088	rs355838
Alanine Aminotransferase	EIF3EP3	Pituitary	2:165528876:CS1	0.987943	0.189044	1.13121	2.37523	0.197589	0.0378088	rs355838
Alanine Aminotransferase	chr2:164722522:164727969:clu_47805:ENSG00000082438.15	Adipose_Visceral	2:165528876:CS1	0.987943	0.189044	0.396753	0.804376	0.197589	0.0378088	rs355838
Alanine Aminotransferase	chr2:164727144:164727969:clu_47805:ENSG00000082438.15	Adipose_Visceral	2:165528876:CS1	0.987943	0.189044	-0.492709	1.00338	0.197589	0.0378088	rs355838
Alanine Aminotransferase	GRB14	Esophagus_Muscularis	2:165528876:CS2	0.999975	0.172533	0.0953686	0.272351	0.0999975	0.0172533	rs12328675
Alanine Aminotransferase	chr2:164695833:164699405:clu_44681:ENSG00000082438.15	Esophagus_Muscularis	2:165528876:CS2	0.999975	0.172533	-0.161357	0.471256	0.0999975	0.0172533	rs12328675
Alanine Aminotransferase	chr2:164695833:164699405:clu_45362:ENSG00000082438.15	Artery_Tibial	2:165528876:CS2	0.999975	0.172533	-0.182313	0.60676	0.0999975	0.0172533	rs12328675
Alanine Aminotransferase	chr2:164695833:164699405:clu_50521:ENSG00000082438.15	Nerve_Tibial	2:165528876:CS2	0.999975	0.172533	-0.189277	0.646695	0.0999975	0.0172533	rs12328675
Alanine Aminotransferase	chr2:164695836:164699405:clu_44681:ENSG00000082438.15	Esophagus_Muscularis	2:165528876:CS2	0.999975	0.172533	0.169992	0.490195	0.0999975	0.0172533	rs12328675
Alanine Aminotransferase	chr2:164695836:164699405:clu_45362:ENSG00000082438.15	Artery_Tibial	2:165528876:CS2	0.999975	0.172533	0.172766	0.548018	0.0999975	0.0172533	rs12328675
Alanine Aminotransferase	chr2:164695836:164699405:clu_47802:ENSG00000082438.15	Adipose_Visceral	2:165528876:CS2	0.999975	0.172533	0.627559	1.89194	0.0999975	0.0172533	rs12328675
Alanine Aminotransferase	chr2:164695836:164699405:clu_50521:ENSG00000082438.15	Nerve_Tibial	2:165528876:CS2	0.999975	0.172533	0.178863	0.59303	0.0999975	0.0172533	rs12328675
Alanine Aminotransferase	chr2:164700756:164703104:clu_37204:ENSG00000082438.15	Pancreas	2:165528876:CS2	0.999975	0.172533	-0.458853	1.34053	0.0999975	0.0172533	rs12328675
Alanine Aminotransferase	chr2:164700756:164704444:clu_37204:ENSG00000082438.15	Pancreas	2:165528876:CS2	0.999975	0.172533	0.346138	0.933596	0.0999975	0.0172533	rs12328675
Alanine Aminotransferase	STK39	Adrenal_Gland	2:169931266:CS1	1	0.142674	2.26515	0.300528	1	0.142674	rs115504026
Alanine Aminotransferase	chr2:173918785:173954873:clu_46953:ENSG00000172845.14	Colon_Transverse	2:174031354:CS1	0.990036	0.111826	-3.09852	0.689081	0.990036	0.111826	rs11897681
Alanine Aminotransferase	ENSG00000270574	Adipose_Subcutaneous	2:179367560:CS1	0.999994	0.148831	-0.135154	0.45657	0.0769226	0.0114485	rs13026251
Alanine Aminotransferase	ENSG00000270574	Esophagus_Junction	2:179367560:CS1	0.999994	0.148831	-0.306339	1.19288	0.0769226	0.0114485	rs13026251
Alanine Aminotransferase	ENSG00000270574	Esophagus_Muscularis	2:179367560:CS1	0.999994	0.148831	-0.125131	0.373559	0.0769226	0.0114485	rs13026251
Alanine Aminotransferase	ENSG00000270574	Lung	2:179367560:CS1	0.999994	0.148831	-0.128378	0.497006	0.0769226	0.0114485	rs13026251
Alanine Aminotransferase	ENSG00000270574	Pituitary	2:179367560:CS1	0.999994	0.148831	-0.157276	0.537552	0.0769226	0.0114485	rs13026251
Alanine Aminotransferase	ENSG00000270574	Thyroid	2:179367560:CS1	0.999994	0.148831	-0.121353	0.390331	0.0769226	0.0114485	rs13026251
Alanine Aminotransferase	ENSG00000270574	Whole_Blood	2:179367560:CS1	0.999994	0.148831	-0.144034	0.459412	0.0769226	0.0114485	rs13026251
Alanine Aminotransferase	PLEKHA3	Adipose_Subcutaneous	2:179367560:CS1	0.999994	0.148831	-0.581525	2.23632	0.0769226	0.0114485	rs13026251
Alanine Aminotransferase	PLEKHA3	Muscle_Skeletal	2:179367560:CS1	0.999994	0.148831	-0.142782	0.510025	0.0769226	0.0114485	rs13026251
Alanine Aminotransferase	PLEKHA3	Nerve_Tibial	2:179367560:CS1	0.999994	0.148831	-0.155584	0.521879	0.0769226	0.0114485	rs13026251
Alanine Aminotransferase	PLEKHA3	Whole_Blood	2:179367560:CS1	0.999994	0.148831	-0.104078	0.382246	0.0769226	0.0114485	rs13026251
Alanine Aminotransferase	chr2:178575326:178575980:clu_52439:ENSG00000237298.9	Lung	2:179367560:CS1	0.999994	0.148831	-0.132921	0.485916	0.0769226	0.0114485	rs13026251
Alanine Aminotransferase	chr2:178575326:178575980:clu_52775:ENSG00000237298.9	Thyroid	2:179367560:CS1	0.999994	0.148831	-0.100738	0.351278	0.0769226	0.0114485	rs13026251
Alanine Aminotransferase	ENSG00000261379	Adipose_Subcutaneous	2:227111435:CS1	1	0.390931	-0.414698	0.753434	0.2	0.0781861	rs2176040
Alanine Aminotransferase	ENSG00000272622	Adipose_Subcutaneous	2:227111435:CS1	1	0.390931	-0.372689	0.716033	0.2	0.0781861	rs2176040
Alanine Aminotransferase	ENSG00000272622	Adipose_Visceral	2:227111435:CS1	1	0.390931	-1.33984	2.74184	0.2	0.0781861	rs2176040
Alanine Aminotransferase	IRS1	Adipose_Subcutaneous	2:227111435:CS1	1	0.390931	-0.279788	0.584402	0.2	0.0781861	rs2176040
Alanine Aminotransferase	IRS1	Adipose_Visceral	2:227111435:CS1	1	0.390931	-0.397542	0.835409	0.2	0.0781861	rs2176040
Alanine Aminotransferase	EFHD1	Artery_Aorta	2:233520254:CS1	1	0.362496	0.988629	1.37442	0.333333	0.120832	rs13395911
Alanine Aminotransferase	EFHD1	Liver	2:233520254:CS1	1	0.362496	0.824281	1.18244	0.333333	0.120832	rs13395911
Alanine Aminotransferase	EFHD1	Thyroid	2:233520254:CS1	1	0.362496	2.46832	3.51367	0.333333	0.120832	rs13395911
Alanine Aminotransferase	PPARG	Esophagus_Muscularis	3:12337753:CS1	1.00001	0.216591	-2.34541	4.06491	0.250003	0.0541478	rs13083375
Alanine Aminotransferase	chr3:12289134:12312380:clu_45398:ENSG00000132170.19	Lung	3:12337753:CS1	1.00001	0.216591	1.11052	1.95294	0.250003	0.0541478	rs13083375
Alanine Aminotransferase	chr3:12351674:12379704:clu_42940:ENSG00000132170.19	Adipose_Subcutaneous	3:12337753:CS1	1.00001	0.216591	-1.27585	2.19348	0.250003	0.0541478	rs13083375
Alanine Aminotransferase	chr3:12351674:12379704:clu_45398:ENSG00000132170.19	Lung	3:12337753:CS1	1.00001	0.216591	-0.690893	1.20445	0.250003	0.0541478	rs13083375
Alanine Aminotransferase	NUP210	Brain_Cerebellum	3:12337753:CS3	0.956809	0.0386912	-0.229771	0.414235	0.239202	0.00967281	rs514084
Alanine Aminotransferase	NUP210	Spleen	3:12337753:CS3	0.956809	0.0386912	-1.07075	2.02254	0.239202	0.00967281	rs514084
Alanine Aminotransferase	NUP210	Whole_Blood	3:12337753:CS3	0.956809	0.0386912	-0.29172	0.531773	0.239202	0.00967281	rs514084
Alanine Aminotransferase	chr3:13328946:13332293:clu_45857:ENSG00000132182.11	Thyroid	3:12337753:CS3	0.956809	0.0386912	-0.477349	0.844713	0.239202	0.00967281	rs514084
Alanine Aminotransferase	chr3:12351674:12379704:clu_42940:ENSG00000132170.19	Adipose_Subcutaneous	3:13438234:CS1	0.982414	0.244039	-4.00098	0.636225	0.982414	0.244039	rs2067819~rs13083375
Alanine Aminotransferase	chr3:11833151:11839222:clu_33754:ENSG00000144559.10	Whole_Blood	3:13438234:CS2	0.999996	0.042715	3.51161	0.554074	0.999996	0.042715	rs1175541
Alanine Aminotransferase	chr3:28576496:28757109:clu_46104:ENSG00000144642.21	Thyroid	3:29359952:CS1	0.999971	0.244455	6.68842	1.25703	0.999971	0.244455	rs57440162
Alanine Aminotransferase	ENSG00000271993	Artery_Tibial	3:37102874:CS1	0.955335	0.154609	0.0215845	0.124485	0.0105574	0.00169686	rs4647222
Alanine Aminotransferase	ENSG00000271993	Lung	3:37102874:CS1	0.955335	0.154609	0.0505002	0.47507	0.0105574	0.00169686	rs4647222
Alanine Aminotransferase	ENSG00000272334	Pituitary	3:37102874:CS1	0.955335	0.154609	0.0541334	0.569346	0.0105574	0.00169686	rs4647222
Alanine Aminotransferase	EPM2AIP1	Thyroid	3:37102874:CS1	0.955335	0.154609	-0.0114297	0.140252	0.0105574	0.00169686	rs4647222
Alanine Aminotransferase	GOLGA4-AS1	Kidney_Tube	3:37102874:CS1	0.955335	0.154609	0.0318241	0.213123	0.0105574	0.00169686	rs4647222
Alanine Aminotransferase	LRRFIP2	Artery_Aorta	3:37102874:CS1	0.955335	0.154609	-0.010041	0.0994196	0.0105574	0.00169686	rs4647222
Alanine Aminotransferase	LRRFIP2	Artery_Tibial	3:37102874:CS1	0.955335	0.154609	-0.0110048	0.10091	0.0105574	0.00169686	rs4647222
Alanine Aminotransferase	LRRFIP2	Colon_Sigmoid	3:37102874:CS1	0.955335	0.154609	-0.0191125	0.192003	0.0105574	0.00169686	rs4647222
Alanine Aminotransferase	LRRFIP2	Brain_Cortex	3:37102874:CS1	0.955335	0.154609	-0.01392	0.129125	0.0105574	0.00169686	rs4647222
Alanine Aminotransferase	LRRFIP2	Esophagus_Junction	3:37102874:CS1	0.955335	0.154609	-0.0144635	0.173603	0.0105574	0.00169686	rs4647222
Alanine Aminotransferase	LRRFIP2	Esophagus_Muscularis	3:37102874:CS1	0.955335	0.154609	-0.00983339	0.0633886	0.0105574	0.00169686	rs4647222
Alanine Aminotransferase	LRRFIP2	Muscle_Skeletal	3:37102874:CS1	0.955335	0.154609	-0.00749695	0.0551163	0.0105574	0.00169686	rs4647222
Alanine Aminotransferase	LRRFIP2	Nerve_Tibial	3:37102874:CS1	0.955335	0.154609	-0.0106405	0.105088	0.0105574	0.00169686	rs4647222
Alanine Aminotransferase	LRRFIP2	Thyroid	3:37102874:CS1	0.955335	0.154609	-0.00691985	0.0639952	0.0105574	0.00169686	rs4647222
Alanine Aminotransferase	LRRFIP2	Whole_Blood	3:37102874:CS1	0.955335	0.154609	0.00954995	0.110984	0.0105574	0.00169686	rs4647222
Alanine Aminotransferase	MLH1	Muscle_Skeletal	3:37102874:CS1	0.955335	0.154609	-0.00876891	0.0786881	0.0105574	0.00169686	rs4647222
Alanine Aminotransferase	chr3:36996709:37000955:clu_43266:ENSG00000076242.14	Adipose_Subcutaneous	3:37102874:CS1	0.955335	0.154609	-0.0115077	0.110256	0.0105574	0.00169686	rs4647222
Alanine Aminotransferase	chr3:36996709:37000955:clu_44471:ENSG00000076242.14	Nerve_Tibial	3:37102874:CS1	0.955335	0.154609	-0.0181922	0.149759	0.0105574	0.00169686	rs4647222
Alanine Aminotransferase	chr3:37028932:37040186:clu_39930:ENSG00000076242.14	Artery_Tibial	3:37102874:CS1	0.955335	0.154609	0.0273325	0.185363	0.0105574	0.00169686	rs4647222
Alanine Aminotransferase	chr3:37040294:37047519:clu_38087:ENSG00000076242.14	Artery_Aorta	3:37102874:CS1	0.955335	0.154609	0.0806494	0.496099	0.0105574	0.00169686	rs4647222
Alanine Aminotransferase	chr3:37040294:37047519:clu_46200:ENSG00000076242.14	Thyroid	3:37102874:CS1	0.955335	0.154609	0.017652	0.147368	0.0105574	0.00169686	rs4647222
Alanine Aminotransferase	chr3:37083806:37091467:clu_46202:ENSG00000093167.17	Thyroid	3:37102874:CS1	0.955335	0.154609	0.0131951	0.136184	0.0105574	0.00169686	rs4647222
Alanine Aminotransferase	chr3:37083806:37094792:clu_46202:ENSG00000093167.17	Thyroid	3:37102874:CS1	0.955335	0.154609	-0.0091879	0.0818872	0.0105574	0.00169686	rs4647222
Alanine Aminotransferase	chr3:37091538:37094792:clu_46202:ENSG00000093167.17	Thyroid	3:37102874:CS1	0.955335	0.154609	0.0120333	0.128148	0.0105574	0.00169686	rs4647222
Alanine Aminotransferase	chr3:37096660:37102924:clu_33612:ENSG00000093167.17	Heart_Left_Ventricle	3:37102874:CS1	0.955335	0.154609	-0.0127441	0.139915	0.0105574	0.00169686	rs4647222
Alanine Aminotransferase	chr3:37096660:37102924:clu_37276:ENSG00000093167.17	Esophagus_Junction	3:37102874:CS1	0.955335	0.154609	-0.0172388	0.237917	0.0105574	0.00169686	rs4647222
Alanine Aminotransferase	chr3:37096660:37102924:clu_37696:ENSG00000093167.17	Heart_Atrial_Appendage	3:37102874:CS1	0.955335	0.154609	-0.00992203	0.066877	0.0105574	0.00169686	rs4647222
Alanine Aminotransferase	chr3:37096660:37102924:clu_38010:ENSG00000093167.17	Colon_Sigmoid	3:37102874:CS1	0.955335	0.154609	-0.0452343	0.268874	0.0230657	0.00389015	rs4647222~rs11921099
Alanine Aminotransferase	chr3:37096660:37102924:clu_38090:ENSG00000093167.17	Artery_Aorta	3:37102874:CS1	0.955335	0.154609	-0.0390269	0.205687	0.0332458	0.00569019	rs4647222~rs11921099
Alanine Aminotransferase	chr3:37096660:37102924:clu_39419:ENSG00000093167.17	Esophagus_Muscularis	3:37102874:CS1	0.955335	0.154609	-0.0101898	0.0811036	0.0105574	0.00169686	rs4647222
Alanine Aminotransferase	chr3:37096660:37102924:clu_39934:ENSG00000093167.17	Artery_Tibial	3:37102874:CS1	0.955335	0.154609	-0.0088708	0.0863719	0.0105574	0.00169686	rs4647222
Alanine Aminotransferase	chr3:37096660:37102924:clu_41161:ENSG00000093167.17	Colon_Transverse	3:37102874:CS1	0.955335	0.154609	-0.0150247	0.195116	0.0105574	0.00169686	rs4647222
Alanine Aminotransferase	chr3:37096660:37105455:clu_33612:ENSG00000093167.17	Heart_Left_Ventricle	3:37102874:CS1	0.955335	0.154609	0.00941385	0.112577	0.0105574	0.00169686	rs4647222
Alanine Aminotransferase	chr3:37096660:37105455:clu_37696:ENSG00000093167.17	Heart_Atrial_Appendage	3:37102874:CS1	0.955335	0.154609	0.0091864	0.0805575	0.0105574	0.00169686	rs4647222
Alanine Aminotransferase	chr3:37096660:37105455:clu_38240:ENSG00000093167.17	Muscle_Skeletal	3:37102874:CS1	0.955335	0.154609	0.00829016	0.0675953	0.0105574	0.00169686	rs4647222
Alanine Aminotransferase	chr3:37096660:37105455:clu_39419:ENSG00000093167.17	Esophagus_Muscularis	3:37102874:CS1	0.955335	0.154609	0.0131198	0.129661	0.0105574	0.00169686	rs4647222
Alanine Aminotransferase	chr3:37096660:37105455:clu_39934:ENSG00000093167.17	Artery_Tibial	3:37102874:CS1	0.955335	0.154609	0.014029	0.155921	0.0105574	0.00169686	rs4647222
Alanine Aminotransferase	chr3:37096660:37121492:clu_46203:ENSG00000093167.17	Thyroid	3:37102874:CS1	0.955335	0.154609	-0.0145335	0.14328	0.0105574	0.00169686	rs4647222
Alanine Aminotransferase	chr3:37096660:37129063:clu_46203:ENSG00000093167.17	Thyroid	3:37102874:CS1	0.955335	0.154609	0.00949389	0.0505258	0.0105574	0.00169686	rs4647222
Alanine Aminotransferase	chr3:37103013:37105455:clu_33612:ENSG00000093167.17	Heart_Left_Ventricle	3:37102874:CS1	0.955335	0.154609	-0.0134462	0.128036	0.0105574	0.00169686	rs4647222
Alanine Aminotransferase	chr3:37103013:37105455:clu_37276:ENSG00000093167.17	Esophagus_Junction	3:37102874:CS1	0.955335	0.154609	-0.0173264	0.125907	0.0105574	0.00169686	rs4647222
Alanine Aminotransferase	chr3:37103013:37105455:clu_37696:ENSG00000093167.17	Heart_Atrial_Appendage	3:37102874:CS1	0.955335	0.154609	-0.0105574	0.111409	0.0105574	0.00169686	rs4647222
Alanine Aminotransferase	chr3:37103013:37105455:clu_38010:ENSG00000093167.17	Colon_Sigmoid	3:37102874:CS1	0.955335	0.154609	-0.012851	0.0697267	0.0105574	0.00169686	rs4647222
Alanine Aminotransferase	chr3:37103013:37105455:clu_38240:ENSG00000093167.17	Muscle_Skeletal	3:37102874:CS1	0.955335	0.154609	-0.0282926	0.210516	0.0105574	0.00169686	rs4647222
Alanine Aminotransferase	chr3:37103013:37105455:clu_39419:ENSG00000093167.17	Esophagus_Muscularis	3:37102874:CS1	0.955335	0.154609	-0.0125331	0.120518	0.0105574	0.00169686	rs4647222
Alanine Aminotransferase	chr3:37103013:37105455:clu_41161:ENSG00000093167.17	Colon_Transverse	3:37102874:CS1	0.955335	0.154609	-0.0389529	0.302811	0.0105574	0.00169686	rs4647222
Alanine Aminotransferase	chr3:37121536:37121635:clu_46203:ENSG00000093167.17	Thyroid	3:37102874:CS1	0.955335	0.154609	-0.0138101	0.184493	0.0105574	0.00169686	rs4647222
Alanine Aminotransferase	chr3:37121691:37127630:clu_37696:ENSG00000093167.17	Heart_Atrial_Appendage	3:37102874:CS1	0.955335	0.154609	0.0542193	0.598491	0.0105574	0.00169686	rs4647222
Alanine Aminotransferase	chr3:37121691:37129063:clu_46203:ENSG00000093167.17	Thyroid	3:37102874:CS1	0.955335	0.154609	-0.014452	0.10704	0.0105574	0.00169686	rs4647222
Alanine Aminotransferase	chr3:37127680:37129063:clu_37696:ENSG00000093167.17	Heart_Atrial_Appendage	3:37102874:CS1	0.955335	0.154609	0.0161345	0.189936	0.0105574	0.00169686	rs4647222
Alanine Aminotransferase	chr3:37149038:37174539:clu_28357:ENSG00000093167.17	Liver	3:37102874:CS1	0.955335	0.154609	-0.020319	0.176736	0.0105574	0.00169686	rs4647222
Alanine Aminotransferase	chr3:37149038:37174539:clu_33617:ENSG00000093167.17	Heart_Left_Ventricle	3:37102874:CS1	0.955335	0.154609	-0.0169652	0.227061	0.0105574	0.00169686	rs4647222
Alanine Aminotransferase	chr3:37149038:37174539:clu_34038:ENSG00000093167.17	Whole_Blood	3:37102874:CS1	0.955335	0.154609	-0.00732748	0.0742043	0.0105574	0.00169686	rs4647222
Alanine Aminotransferase	chr3:37149038:37174539:clu_34890:ENSG00000093167.17	Fibroblasts	3:37102874:CS1	0.955335	0.154609	-0.00849766	0	0.0105574	0.00169686	rs4647222
Alanine Aminotransferase	chr3:37149038:37174539:clu_35754:ENSG00000093167.17	Spleen	3:37102874:CS1	0.955335	0.154609	-0.0127489	0.163102	0.0105574	0.00169686	rs4647222
Alanine Aminotransferase	chr3:37149038:37174539:clu_37279:ENSG00000093167.17	Esophagus_Junction	3:37102874:CS1	0.955335	0.154609	-0.0107746	0.081893	0.0105574	0.00169686	rs4647222
Alanine Aminotransferase	chr3:37149038:37174539:clu_38013:ENSG00000093167.17	Colon_Sigmoid	3:37102874:CS1	0.955335	0.154609	-0.0189145	0.183499	0.0105574	0.00169686	rs4647222
Alanine Aminotransferase	chr3:37149038:37174539:clu_38093:ENSG00000093167.17	Artery_Aorta	3:37102874:CS1	0.955335	0.154609	-0.00944895	0.077547	0.0105574	0.00169686	rs4647222
Alanine Aminotransferase	chr3:37149038:37174539:clu_38243:ENSG00000093167.17	Muscle_Skeletal	3:37102874:CS1	0.955335	0.154609	-0.00957237	0.125486	0.0105574	0.00169686	rs4647222
Alanine Aminotransferase	chr3:37149038:37174539:clu_39423:ENSG00000093167.17	Esophagus_Muscularis	3:37102874:CS1	0.955335	0.154609	-0.00923942	0.0949789	0.0105574	0.00169686	rs4647222
Alanine Aminotransferase	chr3:37149038:37174539:clu_39515:ENSG00000093167.17	Esophagus_Mucosa	3:37102874:CS1	0.955335	0.154609	-0.00776538	0.084581	0.0105574	0.00169686	rs4647222
Alanine Aminotransferase	chr3:37149038:37174539:clu_41163:ENSG00000093167.17	Colon_Transverse	3:37102874:CS1	0.955335	0.154609	-0.0103282	0.106652	0.0105574	0.00169686	rs4647222
Alanine Aminotransferase	chr3:37149038:37174539:clu_42018:ENSG00000093167.17	Adipose_Visceral	3:37102874:CS1	0.955335	0.154609	-0.00951748	0.1284	0.0105574	0.00169686	rs4647222
Alanine Aminotransferase	chr3:37149038:37174539:clu_43278:ENSG00000093167.17	Adipose_Subcutaneous	3:37102874:CS1	0.955335	0.154609	-0.00750169	0.0774273	0.0105574	0.00169686	rs4647222
Alanine Aminotransferase	chr3:37149038:37174539:clu_44479:ENSG00000093167.17	Nerve_Tibial	3:37102874:CS1	0.955335	0.154609	-0.0082039	0.073416	0.0105574	0.00169686	rs4647222
Alanine Aminotransferase	chr3:37149038:37174539:clu_45784:ENSG00000093167.17	Lung	3:37102874:CS1	0.955335	0.154609	-0.00813776	0.0944278	0.0105574	0.00169686	rs4647222
Alanine Aminotransferase	chr3:37149038:37174539:clu_46206:ENSG00000093167.17	Thyroid	3:37102874:CS1	0.955335	0.154609	-0.00826352	0.0700383	0.0105574	0.00169686	rs4647222
Alanine Aminotransferase	chr3:37173026:37174539:clu_34038:ENSG00000093167.17	Whole_Blood	3:37102874:CS1	0.955335	0.154609	-0.0280633	0.214252	0.0169458	0.0028173	rs4647222~rs11921099
Alanine Aminotransferase	chr3:37173194:37174539:clu_28357:ENSG00000093167.17	Liver	3:37102874:CS1	0.955335	0.154609	0.0125832	0.142783	0.0105574	0.00169686	rs4647222
Alanine Aminotransferase	chr3:37173194:37174539:clu_32704:ENSG00000093167.17	Pancreas	3:37102874:CS1	0.955335	0.154609	0.0150429	0.12846	0.0105574	0.00169686	rs4647222
Alanine Aminotransferase	chr3:37173194:37174539:clu_33617:ENSG00000093167.17	Heart_Left_Ventricle	3:37102874:CS1	0.955335	0.154609	0.00895016	0.070882	0.0105574	0.00169686	rs4647222
Alanine Aminotransferase	chr3:37173194:37174539:clu_35754:ENSG00000093167.17	Spleen	3:37102874:CS1	0.955335	0.154609	0.0122303	0.147574	0.0105574	0.00169686	rs4647222
Alanine Aminotransferase	chr3:37173194:37174539:clu_37466:ENSG00000093167.17	Stomach	3:37102874:CS1	0.955335	0.154609	0.0108563	0.101585	0.0105574	0.00169686	rs4647222
Alanine Aminotransferase	chr3:37173194:37174539:clu_38013:ENSG00000093167.17	Colon_Sigmoid	3:37102874:CS1	0.955335	0.154609	0.0116511	0.0945697	0.0105574	0.00169686	rs4647222
Alanine Aminotransferase	chr3:37173194:37174539:clu_39423:ENSG00000093167.17	Esophagus_Muscularis	3:37102874:CS1	0.955335	0.154609	0.00820406	0.0979591	0.0105574	0.00169686	rs4647222
Alanine Aminotransferase	chr3:37173194:37174539:clu_41163:ENSG00000093167.17	Colon_Transverse	3:37102874:CS1	0.955335	0.154609	0.0090896	0.0556339	0.0105574	0.00169686	rs4647222
Alanine Aminotransferase	chr3:37174605:37175818:clu_33617:ENSG00000093167.17	Heart_Left_Ventricle	3:37102874:CS1	0.955335	0.154609	0.0236646	0.189481	0.0105574	0.00169686	rs4647222
Alanine Aminotransferase	chr3:37174605:37175818:clu_38014:ENSG00000093167.17	Colon_Sigmoid	3:37102874:CS1	0.955335	0.154609	0.0141689	0.185291	0.0105574	0.00169686	rs4647222
Alanine Aminotransferase	chr3:37174605:37175818:clu_43279:ENSG00000093167.17	Adipose_Subcutaneous	3:37102874:CS1	0.955335	0.154609	0.010913	0.098855	0.0105574	0.00169686	rs4647222
Alanine Aminotransferase	chr3:37174605:37175818:clu_44480:ENSG00000093167.17	Nerve_Tibial	3:37102874:CS1	0.955335	0.154609	0.0116224	0.123787	0.0094008	0.00151885	rs4647222~rs11921099
Alanine Aminotransferase	chr3:37174605:37176060:clu_38014:ENSG00000093167.17	Colon_Sigmoid	3:37102874:CS1	0.955335	0.154609	-0.0147438	0.17204	0.0105574	0.00169686	rs4647222
Alanine Aminotransferase	chr3:37174605:37176060:clu_43279:ENSG00000093167.17	Adipose_Subcutaneous	3:37102874:CS1	0.955335	0.154609	-0.011226	0.0959036	0.0105574	0.00169686	rs4647222
Alanine Aminotransferase	chr3:37174605:37176060:clu_44480:ENSG00000093167.17	Nerve_Tibial	3:37102874:CS1	0.955335	0.154609	-0.0437116	0.268912	0.0327855	0.00561269	rs4647222~rs11921099
Alanine Aminotransferase	chr3:37355187:37361243:clu_39521:ENSG00000144674.16	Esophagus_Mucosa	3:37102874:CS1	0.955335	0.154609	-0.0464435	0.295899	0.0164136	0.0027247	rs4647222~rs11921099
Alanine Aminotransferase	ENSG00000272182	Spleen	3:58506850:CS1	0.977556	0.107351	-0.109026	0.433815	0.0543086	0.00596395	rs779419642
Alanine Aminotransferase	KCTD6	Esophagus_Muscularis	3:58506850:CS1	0.977556	0.107351	-0.066462	0.243881	0.0543086	0.00596395	rs779419642
Alanine Aminotransferase	KCTD6	Muscle_Skeletal	3:58506850:CS1	0.977556	0.107351	-0.167395	0.685681	0.0543086	0.00596395	rs779419642
Alanine Aminotransferase	KCTD6	Thyroid	3:58506850:CS1	0.977556	0.107351	-0.0912898	0.450388	0.0543086	0.00596395	rs779419642
Alanine Aminotransferase	PDHB	Colon_Sigmoid	3:58506850:CS1	0.977556	0.107351	0.0660355	0.239991	0.0543086	0.00596395	rs779419642
Alanine Aminotransferase	PDHB	Esophagus_Muscularis	3:58506850:CS1	0.977556	0.107351	0.0583056	0.289697	0.0543086	0.00596395	rs779419642
Alanine Aminotransferase	PDHB	Stomach	3:58506850:CS1	0.977556	0.107351	0.152944	0.702145	0.0543086	0.00596395	rs779419642
Alanine Aminotransferase	PXK	Fibroblasts	3:58506850:CS1	0.977556	0.107351	0.0337653	0.140896	0.0543086	0.00596395	rs779419642
Alanine Aminotransferase	RPP14	Fibroblasts	3:58506850:CS1	0.977556	0.107351	0.271739	1.29131	0.0543086	0.00596395	rs779419642
Alanine Aminotransferase	chr3:58409618:58424752:clu_35680:ENSG00000168297.15	Fibroblasts	3:58506850:CS1	0.977556	0.107351	0.0336556	0.130116	0.0543086	0.00596395	rs779419642
Alanine Aminotransferase	chr3:58409618:58424752:clu_38177:ENSG00000168297.15	Esophagus_Junction	3:58506850:CS1	0.977556	0.107351	0.0464291	0.204333	0.0543086	0.00596395	rs779419642
Alanine Aminotransferase	chr3:58409618:58424752:clu_38930:ENSG00000168297.15	Colon_Sigmoid	3:58506850:CS1	0.977556	0.107351	0.0517625	0.204127	0.0543086	0.00596395	rs779419642
Alanine Aminotransferase	chr3:58409618:58424752:clu_39033:ENSG00000168297.15	Artery_Aorta	3:58506850:CS1	0.977556	0.107351	0.0419218	0.161831	0.0543086	0.00596395	rs779419642
Alanine Aminotransferase	chr3:58409618:58424752:clu_40375:ENSG00000168297.15	Esophagus_Muscularis	3:58506850:CS1	0.977556	0.107351	0.0387131	0.158048	0.0543086	0.00596395	rs779419642
Alanine Aminotransferase	chr3:58409618:58424752:clu_40911:ENSG00000168297.15	Artery_Tibial	3:58506850:CS1	0.977556	0.107351	0.0415763	0.177873	0.0543086	0.00596395	rs779419642
Alanine Aminotransferase	chr3:58409618:58424752:clu_47308:ENSG00000168297.15	Thyroid	3:58506850:CS1	0.977556	0.107351	0.0374868	0.163847	0.0543086	0.00596395	rs779419642
Alanine Aminotransferase	chr3:58410159:58411625:clu_34897:ENSG00000168297.15	Whole_Blood	3:58506850:CS1	0.977556	0.107351	0.0784016	0.301139	0.0543086	0.00596395	rs779419642
Alanine Aminotransferase	chr3:58410159:58412901:clu_47308:ENSG00000168297.15	Thyroid	3:58506850:CS1	0.977556	0.107351	-0.276577	1.11479	0.0543086	0.00596395	rs779419642
Alanine Aminotransferase	SLC25A26	Lymphocytes	3:65157937:CS1	0.999812	0.118498	9.43713	1.67424	0.999812	0.118498	rs9836030
Alanine Aminotransferase	chr3:64551062:64561578:clu_43064:ENSG00000163638.13	Adipose_Visceral	3:65157937:CS2	0.984593	0.0810936	-0.451627	0.489675	0.492296	0.0405468	rs6782076
Alanine Aminotransferase	chr3:64551062:64561578:clu_44332:ENSG00000163638.13	Adipose_Subcutaneous	3:65157937:CS2	0.984593	0.0810936	-0.605644	0.640823	0.492296	0.0405468	rs6782076
Alanine Aminotransferase	SLC12A8	Adipose_Subcutaneous	3:124927668:CS1	0.999982	0.0950709	2.86941	4.23826	0.333327	0.0316903	rs9870956
Alanine Aminotransferase	SLC12A8	Liver	3:124927668:CS1	0.999982	0.0950709	0.366583	0.527853	0.333327	0.0316903	rs9870956
Alanine Aminotransferase	SLC12A8	Pancreas	3:124927668:CS1	0.999982	0.0950709	0.491351	0.679203	0.333327	0.0316903	rs9870956
Alanine Aminotransferase	ALDH1L1	Liver	3:124927668:CS2	0.999989	0.0868644	0.440485	0.760278	0.249997	0.0217161	rs750714
Alanine Aminotransferase	ALDH1L1	Nerve_Tibial	3:124927668:CS2	0.999989	0.0868644	-0.358521	0.618416	0.249997	0.0217161	rs750714
Alanine Aminotransferase	chr3:125110335:125118769:clu_47646:ENSG00000221955.10	Lung	3:124927668:CS2	0.999989	0.0868644	0.98092	1.72619	0.249997	0.0217161	rs750714
Alanine Aminotransferase	chr3:127017037:127017425:clu_36400:ENSG00000114554.11	Artery_Coronary	3:124927668:CS2	0.999989	0.0868644	-2.3498	4.21062	0.249997	0.0217161	rs750714
Alanine Aminotransferase	MSL2	Whole_Blood	3:136036226:CS1	1	0.479548	5.92603	8.66349	0.333333	0.159849	rs28631273
Alanine Aminotransferase	PPP2R3A	Brain_Cerebellum	3:136036226:CS1	1	0.479548	4.04678	5.71431	0.333333	0.159849	rs28631273
Alanine Aminotransferase	PPP2R3A	Spleen	3:136036226:CS1	1	0.479548	1.11967	1.59054	0.333333	0.159849	rs28631273
Alanine Aminotransferase	PCCB	Adipose_Subcutaneous	3:136036226:CS2	0.952531	0.0631115	0.0196101	0.171703	0.0152734	2.69865e-05	rs12488721
Alanine Aminotransferase	PCCB	Artery_Tibial	3:136036226:CS2	0.952531	0.0631115	0.0185516	0.145935	0.0152734	2.69865e-05	rs12488721
Alanine Aminotransferase	PCCB	Brain_Cerebellum	3:136036226:CS2	0.952531	0.0631115	1.03568	1.44211	0.339345	0.0298597	rs12488721~rs650505
Alanine Aminotransferase	PCCB	Brain_Cortex	3:136036226:CS2	0.952531	0.0631115	0.0915963	0.415341	0.0566758	0.0030419	rs12488721~rs7632309
Alanine Aminotransferase	PCCB	Esophagus_Muscularis	3:136036226:CS2	0.952531	0.0631115	0.0396926	0.283083	0.0152734	2.69865e-05	rs12488721
Alanine Aminotransferase	PCCB	Heart_Atrial_Appendage	3:136036226:CS2	0.952531	0.0631115	0.0215066	0.189474	0.0152734	2.69865e-05	rs12488721
Alanine Aminotransferase	PCCB	Kidney_Glom	3:136036226:CS2	0.952531	0.0631115	0.0144876	0.117325	0.0152734	2.69865e-05	rs12488721
Alanine Aminotransferase	PCCB	Lung	3:136036226:CS2	0.952531	0.0631115	0.0655392	0.289463	0.0524525	0.00210248	rs12488721~rs7632309
Alanine Aminotransferase	PCCB	Lymphocytes	3:136036226:CS2	0.952531	0.0631115	0.0432625	0.360027	0.0152734	2.69865e-05	rs12488721
Alanine Aminotransferase	PCCB	Muscle_Skeletal	3:136036226:CS2	0.952531	0.0631115	0.0128515	0.0870046	0.0234893	0.00206086	rs12488721~rs7632309
Alanine Aminotransferase	PCCB	Nerve_Tibial	3:136036226:CS2	0.952531	0.0631115	0.0253537	0.218445	0.0152734	2.69865e-05	rs12488721
Alanine Aminotransferase	PCCB	Pancreas	3:136036226:CS2	0.952531	0.0631115	0.0488521	0.497037	0.0152734	2.69865e-05	rs12488721
Alanine Aminotransferase	PCCB	Pituitary	3:136036226:CS2	0.952531	0.0631115	0.608486	0.849831	0.343108	0.0258037	rs12488721~rs650505
Alanine Aminotransferase	PCCB	Whole_Blood	3:136036226:CS2	0.952531	0.0631115	0.0147895	0.119506	0.0152734	2.69865e-05	rs12488721
Alanine Aminotransferase	PCOLCE2	Adipose_Visceral	3:142659361:CS1	0.999859	0.190939	-0.757103	0.976979	0.383638	0.074029	rs7618121~rs12695769
Alanine Aminotransferase	PCOLCE2	Lung	3:142659361:CS1	0.999859	0.190939	-1.70826	2.57383	0.30811	0.0584548	rs12695769
Alanine Aminotransferase	chr3:141953016:141959674:clu_34390:ENSG00000114126.17	Pancreas	3:142659361:CS1	0.999859	0.190939	2.98057	4.53936	0.30811	0.0584548	rs12695769
Alanine Aminotransferase	LOC100289361	Islets	3:142659361:CS2	0.959495	0.0699205	0.0326013	0.137745	0.0423137	0.00308148	rs10935475
Alanine Aminotransferase	LOC100289361	Kidney_Glom	3:142659361:CS2	0.959495	0.0699205	-0.0369526	0.161069	0.0423137	0.00308148	rs10935475
Alanine Aminotransferase	U2SURP	Adipose_Visceral	3:142659361:CS2	0.959495	0.0699205	0.0950315	0.421946	0.0423137	0.00308148	rs10935475
Alanine Aminotransferase	U2SURP	Fibroblasts	3:142659361:CS2	0.959495	0.0699205	0.072704	0.274084	0.0423137	0.00308148	rs10935475
Alanine Aminotransferase	U2SURP	Lung	3:142659361:CS2	0.959495	0.0699205	0.09059	0.475662	0.0423137	0.00308148	rs10935475
Alanine Aminotransferase	chr3:143053794:143054943:clu_41384:ENSG00000163714.17	Esophagus_Muscularis	3:142659361:CS2	0.959495	0.0699205	-0.0905243	0.510346	0.0423137	0.00308148	rs10935475
Alanine Aminotransferase	chr3:143053794:143056312:clu_34427:ENSG00000163714.17	Pancreas	3:142659361:CS2	0.959495	0.0699205	0.0393954	0.196093	0.0423137	0.00308148	rs10935475
Alanine Aminotransferase	chr3:143053794:143056312:clu_36618:ENSG00000163714.17	Fibroblasts	3:142659361:CS2	0.959495	0.0699205	0.0234545	0.108434	0.0423137	0.00308148	rs10935475
Alanine Aminotransferase	chr3:143053794:143056312:clu_37544:ENSG00000163714.17	Spleen	3:142659361:CS2	0.959495	0.0699205	0.0402654	0.199081	0.0423137	0.00308148	rs10935475
Alanine Aminotransferase	chr3:143053794:143056312:clu_39691:ENSG00000163714.17	Heart_Atrial_Appendage	3:142659361:CS2	0.959495	0.0699205	0.0268253	0.172255	0.0285939	0.00212785	rs251484~rs10935475
Alanine Aminotransferase	chr3:143053794:143056312:clu_39958:ENSG00000163714.17	Colon_Sigmoid	3:142659361:CS2	0.959495	0.0699205	0.0469813	0.23143	0.0423137	0.00308148	rs10935475
Alanine Aminotransferase	chr3:143053794:143056312:clu_40032:ENSG00000163714.17	Artery_Aorta	3:142659361:CS2	0.959495	0.0699205	0.0273893	0.141167	0.0423137	0.00308148	rs10935475
Alanine Aminotransferase	chr3:143053794:143056312:clu_40234:ENSG00000163714.17	Muscle_Skeletal	3:142659361:CS2	0.959495	0.0699205	0.027117	0.108203	0.0423137	0.00308148	rs10935475
Alanine Aminotransferase	chr3:143053794:143056312:clu_41384:ENSG00000163714.17	Esophagus_Muscularis	3:142659361:CS2	0.959495	0.0699205	0.0211734	0.0949278	0.0423137	0.00308148	rs10935475
Alanine Aminotransferase	chr3:143053794:143056312:clu_41479:ENSG00000163714.17	Esophagus_Mucosa	3:142659361:CS2	0.959495	0.0699205	0.026094	0.13465	0.0423137	0.00308148	rs10935475
Alanine Aminotransferase	chr3:143053794:143056312:clu_41955:ENSG00000163714.17	Artery_Tibial	3:142659361:CS2	0.959495	0.0699205	0.026417	0.121842	0.0423137	0.00308148	rs10935475
Alanine Aminotransferase	chr3:143053794:143056312:clu_43218:ENSG00000163714.17	Colon_Transverse	3:142659361:CS2	0.959495	0.0699205	0.039504	0.191529	0.0423137	0.00308148	rs10935475
Alanine Aminotransferase	chr3:143053794:143056312:clu_45381:ENSG00000163714.17	Adipose_Subcutaneous	3:142659361:CS2	0.959495	0.0699205	0.043051	0.22743	0.0423137	0.00308148	rs10935475
Alanine Aminotransferase	chr3:143053794:143056312:clu_46705:ENSG00000163714.17	Nerve_Tibial	3:142659361:CS2	0.959495	0.0699205	0.0285047	0.163752	0.0423137	0.00308148	rs10935475
Alanine Aminotransferase	chr3:143053794:143056312:clu_48152:ENSG00000163714.17	Lung	3:142659361:CS2	0.959495	0.0699205	0.0226986	0.113649	0.0423137	0.00308148	rs10935475
Alanine Aminotransferase	chr3:143053794:143056312:clu_48495:ENSG00000163714.17	Thyroid	3:142659361:CS2	0.959495	0.0699205	0.0220492	0.0970123	0.0423137	0.00308148	rs10935475
Alanine Aminotransferase	chr3:143832221:143848148:clu_45388:ENSG00000181804.14	Adipose_Subcutaneous	3:142659361:CS2	0.959495	0.0699205	0.158102	0.836104	0.0423137	0.00308148	rs10935475
Alanine Aminotransferase	chr3:143985846:143989510:clu_41960:ENSG00000181744.8	Artery_Tibial	3:142659361:CS2	0.959495	0.0699205	-0.235537	1.29179	0.0423137	0.00308148	rs10935475
Alanine Aminotransferase	EEF1A1P45	Pancreas	3:149114757:CS3	1.00127	0.0819012	3.78967	3.9257	0.500636	0.0409506	rs9857970
Alanine Aminotransferase	EEF1A1P45	Stomach	3:149114757:CS3	1.00127	0.0819012	1.01059	1.04464	0.500636	0.0409506	rs9857970
Alanine Aminotransferase	chr3:152396224:152414941:clu_40318:ENSG00000152601.17	Muscle_Skeletal	3:151989828:CS1	0.995879	0.150845	-3.86036	0.747043	0.995879	0.150845	rs7610095
Alanine Aminotransferase	P2RY14	Thyroid	3:151989828:CS2	0.981199	0.0562884	0.162901	0.318599	0.233398	0.0135304	rs12497019
Alanine Aminotransferase	chr3:150603499:150618709:clu_39425:ENSG00000198843.12	Stomach	3:151989828:CS2	0.981199	0.0562884	0.125834	0.639065	0.0476058	0.00216689	rs12497019~rs1388624
Alanine Aminotransferase	chr3:151219642:151248865:clu_41464:ENSG00000174944.8	Esophagus_Muscularis	3:151989828:CS2	0.981199	0.0562884	-1.00791	1.92315	0.233398	0.0135304	rs12497019
Alanine Aminotransferase	chr3:151219642:151248865:clu_45478:ENSG00000174944.8	Adipose_Subcutaneous	3:151989828:CS2	0.981199	0.0562884	-0.230526	0.430768	0.233398	0.0135304	rs12497019
Alanine Aminotransferase	chr3:151219642:151248865:clu_45478:ENSG00000174946.6	Adipose_Subcutaneous	3:151989828:CS2	0.981199	0.0562884	-0.229713	0.431379	0.233398	0.0135304	rs12497019
Alanine Aminotransferase	SLC33A1	Adipose_Subcutaneous	3:155560978:CS1	0.979213	0.124748	0.0501242	0.197807	0.0544007	0.00693044	rs407258
Alanine Aminotransferase	SLC33A1	Adipose_Visceral	3:155560978:CS1	0.979213	0.124748	0.0841323	0.350101	0.0544007	0.00693044	rs407258
Alanine Aminotransferase	SLC33A1	Artery_Aorta	3:155560978:CS1	0.979213	0.124748	0.138345	0.629362	0.0544007	0.00693044	rs407258
Alanine Aminotransferase	SLC33A1	Artery_Tibial	3:155560978:CS1	0.979213	0.124748	0.0682323	0.274226	0.0544007	0.00693044	rs407258
Alanine Aminotransferase	SLC33A1	Colon_Sigmoid	3:155560978:CS1	0.979213	0.124748	0.10142	0.443594	0.0544007	0.00693044	rs407258
Alanine Aminotransferase	SLC33A1	Colon_Transverse	3:155560978:CS1	0.979213	0.124748	0.0746774	0.350917	0.0544007	0.00693044	rs407258
Alanine Aminotransferase	SLC33A1	Brain_Cortex	3:155560978:CS1	0.979213	0.124748	0.18384	0.836759	0.0544007	0.00693044	rs407258
Alanine Aminotransferase	SLC33A1	Esophagus_Mucosa	3:155560978:CS1	0.979213	0.124748	0.227306	0.897274	0.0544007	0.00693044	rs407258
Alanine Aminotransferase	SLC33A1	Esophagus_Muscularis	3:155560978:CS1	0.979213	0.124748	0.0478265	0.17467	0.0544007	0.00693044	rs407258
Alanine Aminotransferase	SLC33A1	Kidney_Tube	3:155560978:CS1	0.979213	0.124748	0.0442576	0.177309	0.0544007	0.00693044	rs407258
Alanine Aminotransferase	SLC33A1	Lung	3:155560978:CS1	0.979213	0.124748	0.0598067	0.220737	0.0544007	0.00693044	rs407258
Alanine Aminotransferase	SLC33A1	Nerve_Tibial	3:155560978:CS1	0.979213	0.124748	0.0465228	0.200109	0.0544007	0.00693044	rs407258
Alanine Aminotransferase	chr3:155833585:155842432:clu_39461:ENSG00000169359.13	Stomach	3:155560978:CS1	0.979213	0.124748	-0.251176	1.24717	0.0544007	0.00693044	rs407258
Alanine Aminotransferase	chr3:155833585:155842432:clu_40137:ENSG00000169359.13	Artery_Aorta	3:155560978:CS1	0.979213	0.124748	-0.375839	1.68196	0.0544007	0.00693044	rs407258
Alanine Aminotransferase	chr3:155833585:155842432:clu_42078:ENSG00000169359.13	Artery_Tibial	3:155560978:CS1	0.979213	0.124748	-0.0638909	0.275597	0.0544007	0.00693044	rs407258
Alanine Aminotransferase	chr3:155833585:155842432:clu_45530:ENSG00000169359.13	Adipose_Subcutaneous	3:155560978:CS1	0.979213	0.124748	-0.0585998	0.260622	0.0544007	0.00693044	rs407258
Alanine Aminotransferase	chr3:155833585:155842432:clu_46856:ENSG00000169359.13	Nerve_Tibial	3:155560978:CS1	0.979213	0.124748	-0.383888	1.46156	0.0544007	0.00693044	rs407258
Alanine Aminotransferase	chr3:155833585:155842432:clu_48294:ENSG00000169359.13	Lung	3:155560978:CS1	0.979213	0.124748	-0.144879	0.654325	0.0544007	0.00693044	rs407258
Alanine Aminotransferase	TIPARP	Artery_Tibial	3:156797941:CS1	0.999431	0.187866	0.995956	0.128599	0.999431	0.187866	rs344071~rs9854955~rs6805781~rs1979485
Alanine Aminotransferase	C3orf33	Adipose_Visceral	3:156797941:CS2	0.997692	0.0609534	0.432328	1.30346	0.0909618	0.00552159	rs1685752
Alanine Aminotransferase	GMPS	Adipose_Subcutaneous	3:156797941:CS2	0.997692	0.0609534	-0.0985042	0.339687	0.0909618	0.00552159	rs1685752
Alanine Aminotransferase	GMPS	Adipose_Visceral	3:156797941:CS2	0.997692	0.0609534	-0.211084	0.675761	0.0909618	0.00552159	rs1685752
Alanine Aminotransferase	GMPS	Liver	3:156797941:CS2	0.997692	0.0609534	-0.572248	1.65679	0.0909618	0.00552159	rs1685752
Alanine Aminotransferase	GMPS	Muscle_Skeletal	3:156797941:CS2	0.997692	0.0609534	-0.0838048	0.252937	0.0909618	0.00552159	rs1685752
Alanine Aminotransferase	GMPS	Nerve_Tibial	3:156797941:CS2	0.997692	0.0609534	-0.0707307	0.219323	0.0909618	0.00552159	rs1685752
Alanine Aminotransferase	GMPS	Stomach	3:156797941:CS2	0.997692	0.0609534	-0.694235	2.51746	0.0909618	0.00552159	rs1685752
Alanine Aminotransferase	GMPS	Thyroid	3:156797941:CS2	0.997692	0.0609534	-0.635656	1.74157	0.0909618	0.00552159	rs1685752
Alanine Aminotransferase	PLCH1	Esophagus_Muscularis	3:156797941:CS2	0.997692	0.0609534	0.120337	0.387744	0.0909618	0.00552159	rs1685752
Alanine Aminotransferase	SLC33A1	Esophagus_Muscularis	3:156797941:CS2	0.997692	0.0609534	0.16662	0.549883	0.0909618	0.00552159	rs1685752
Alanine Aminotransferase	SLC33A1	Fibroblasts	3:156797941:CS2	0.997692	0.0609534	0.174399	0.606014	0.0880734	0.00573748	rs1685752~rs13061037
Alanine Aminotransferase	IFT80	Adipose_Visceral	3:160029132:CS1	0.969516	0.331358	0.0874267	0.491391	0.0295742	0.00994769	rs74808447~rs10936207
Alanine Aminotransferase	IFT80	Artery_Tibial	3:160029132:CS1	0.969516	0.331358	0.135964	0.436766	0.0783284	0.0267842	rs74808447
Alanine Aminotransferase	IFT80	Heart_Left_Ventricle	3:160029132:CS1	0.969516	0.331358	0.236182	0.94378	0.0783284	0.0267842	rs74808447
Alanine Aminotransferase	IFT80	Nerve_Tibial	3:160029132:CS1	0.969516	0.331358	0.219573	0.666779	0.0783284	0.0267842	rs74808447
Alanine Aminotransferase	SMC4	Artery_Coronary	3:160029132:CS1	0.969516	0.331358	0.475761	1.46404	0.0783284	0.0267842	rs74808447
Alanine Aminotransferase	SMC4	Muscle_Skeletal	3:160029132:CS1	0.969516	0.331358	0.161272	0.521866	0.0783284	0.0267842	rs74808447
Alanine Aminotransferase	SMC4	Whole_Blood	3:160029132:CS1	0.969516	0.331358	0.215933	0.740883	0.0783284	0.0267842	rs74808447
Alanine Aminotransferase	TRIM59	Artery_Coronary	3:160029132:CS1	0.969516	0.331358	0.422463	1.59858	0.0783284	0.0267842	rs74808447
Alanine Aminotransferase	chr3:160412453:160413473:clu_37682:ENSG00000113810.15	Spleen	3:160029132:CS1	0.969516	0.331358	0.50501	1.86001	0.0783284	0.0267842	rs74808447
Alanine Aminotransferase	chr3:160412453:160413473:clu_39286:ENSG00000113810.15	Esophagus_Junction	3:160029132:CS1	0.969516	0.331358	0.690206	2.39775	0.0783284	0.0267842	rs74808447
Alanine Aminotransferase	chr3:160412849:160413473:clu_37682:ENSG00000113810.15	Spleen	3:160029132:CS1	0.969516	0.331358	-0.586676	2.00625	0.0783284	0.0267842	rs74808447
Alanine Aminotransferase	chr3:160412849:160413473:clu_42142:ENSG00000113810.15	Artery_Tibial	3:160029132:CS1	0.969516	0.331358	-0.207717	0.842679	0.0783284	0.0267842	rs74808447
Alanine Aminotransferase	chr3:160412849:160413473:clu_44310:ENSG00000113810.15	Adipose_Visceral	3:160029132:CS1	0.969516	0.331358	-0.176221	0.491739	0.0783284	0.0267842	rs74808447
Alanine Aminotransferase	SLC2A2	Fibroblasts	3:170727739:CS1	1.00005	0.157891	-3.56219	3.66736	0.500023	0.0789456	rs7644261
Alanine Aminotransferase	SLC2A2	Kidney_Tube	3:170727739:CS1	1.00005	0.157891	-0.708026	0.715278	0.500023	0.0789456	rs7644261
Alanine Aminotransferase	chr3:171138379:171139470:clu_39377:ENSG00000154310.16	Esophagus_Junction	3:170727739:CS2	0.950915	0.0369835	0.776317	1.86499	0.158486	0.00616392	rs12488990
Alanine Aminotransferase	chr3:171138379:171139470:clu_41652:ENSG00000154310.16	Esophagus_Muscularis	3:170727739:CS2	0.950915	0.0369835	0.188981	0.444223	0.158486	0.00616392	rs12488990
Alanine Aminotransferase	chr3:171138379:171140399:clu_39377:ENSG00000154310.16	Esophagus_Junction	3:170727739:CS2	0.950915	0.0369835	-0.135504	0.305916	0.158486	0.00616392	rs12488990
Alanine Aminotransferase	chr3:171138379:171140399:clu_39608:ENSG00000154310.16	Stomach	3:170727739:CS2	0.950915	0.0369835	-0.26094	0.617562	0.158486	0.00616392	rs12488990
Alanine Aminotransferase	chr3:171138379:171140399:clu_41652:ENSG00000154310.16	Esophagus_Muscularis	3:170727739:CS2	0.950915	0.0369835	-0.111191	0.269557	0.158486	0.00616392	rs12488990
Alanine Aminotransferase	chr3:171138379:171140399:clu_42238:ENSG00000154310.16	Artery_Tibial	3:170727739:CS2	0.950915	0.0369835	-0.12277	0.280566	0.158486	0.00616392	rs12488990
Alanine Aminotransferase	chr3:172378436:172380966:clu_40301:ENSG00000075420.12	Artery_Aorta	3:172294500:CS1	1	0.494544	13.8933	0.996421	1	0.494544	rs79287178
Alanine Aminotransferase	ENSG00000279862	Spleen	3:172294500:CS2	1.00007	0.0577936	-1.2132	1.7801	0.333356	0.0192645	rs234055
Alanine Aminotransferase	TNFSF10	Kidney_Tube	3:172294500:CS2	1.00007	0.0577936	-0.245238	0.362461	0.333356	0.0192645	rs234055
Alanine Aminotransferase	TNFSF10	Pancreas	3:172294500:CS2	1.00007	0.0577936	-1.28318	1.79235	0.333356	0.0192645	rs234055
Alanine Aminotransferase	chr3:186787264:186787495:clu_36128:ENSG00000156976.16	Whole_Blood	3:185796785:CS1	1	0.123002	-1.42811	1.46794	0.5	0.061501	rs4077189
Alanine Aminotransferase	chr3:186787584:186787803:clu_36128:ENSG00000156976.16	Whole_Blood	3:185796785:CS1	1	0.123002	1.87658	1.92726	0.5	0.061501	rs4077189
Alanine Aminotransferase	DCAF16	Adipose_Visceral	4:17980202:CS1	0.955655	0.165565	-0.0159404	0.110487	0.0261876	0.00405692	rs12640250
Alanine Aminotransferase	DCAF16	Adrenal_Gland	4:17980202:CS1	0.955655	0.165565	-0.0268837	0.20606	0.0261876	0.00405692	rs12640250
Alanine Aminotransferase	DCAF16	Artery_Aorta	4:17980202:CS1	0.955655	0.165565	-0.0186204	0.154719	0.0261876	0.00405692	rs12640250
Alanine Aminotransferase	DCAF16	Artery_Coronary	4:17980202:CS1	0.955655	0.165565	-0.0311264	0.189486	0.0261876	0.00405692	rs12640250
Alanine Aminotransferase	DCAF16	Artery_Tibial	4:17980202:CS1	0.955655	0.165565	-0.0126151	0.0768658	0.0261876	0.00405692	rs12640250
Alanine Aminotransferase	DCAF16	Colon_Sigmoid	4:17980202:CS1	0.955655	0.165565	-0.230998	0.526451	0.156858	0.0310662	rs12640250~rs6820810
Alanine Aminotransferase	DCAF16	Esophagus_Junction	4:17980202:CS1	0.955655	0.165565	-0.0265634	0.146621	0.0261876	0.00405692	rs12640250
Alanine Aminotransferase	DCAF16	Esophagus_Mucosa	4:17980202:CS1	0.955655	0.165565	-0.0204379	0.144036	0.0261876	0.00405692	rs12640250
Alanine Aminotransferase	DCAF16	Esophagus_Muscularis	4:17980202:CS1	0.955655	0.165565	-0.127172	0.234888	0.222671	0.0452461	rs12640250~rs6820810
Alanine Aminotransferase	DCAF16	Fibroblasts	4:17980202:CS1	0.955655	0.165565	-0.0189071	0.116983	0.0261876	0.00405692	rs12640250
Alanine Aminotransferase	DCAF16	Heart_Atrial_Appendage	4:17980202:CS1	0.955655	0.165565	-0.031144	0.226504	0.0261876	0.00405692	rs12640250
Alanine Aminotransferase	DCAF16	Lung	4:17980202:CS1	0.955655	0.165565	-0.0146189	0.0696564	0.0261876	0.00405692	rs12640250
Alanine Aminotransferase	DCAF16	Nerve_Tibial	4:17980202:CS1	0.955655	0.165565	-0.0153354	0.0682276	0.0261876	0.00405692	rs12640250
Alanine Aminotransferase	DCAF16	Pancreas	4:17980202:CS1	0.955655	0.165565	-0.0254957	0.197743	0.0261876	0.00405692	rs12640250
Alanine Aminotransferase	DCAF16	Pituitary	4:17980202:CS1	0.955655	0.165565	-0.0387666	0.255836	0.0261876	0.00405692	rs12640250
Alanine Aminotransferase	DCAF16	Small_Intestine	4:17980202:CS1	0.955655	0.165565	-0.0974413	0.676869	0.0261876	0.00405692	rs12640250
Alanine Aminotransferase	DCAF16	Spleen	4:17980202:CS1	0.955655	0.165565	-0.0397236	0.257365	0.0261876	0.00405692	rs12640250
Alanine Aminotransferase	DCAF16	Stomach	4:17980202:CS1	0.955655	0.165565	-0.0243212	0.110767	0.0261876	0.00405692	rs12640250
Alanine Aminotransferase	DCAF16	Thyroid	4:17980202:CS1	0.955655	0.165565	-0.0146852	0.0771973	0.0261876	0.00405692	rs12640250
Alanine Aminotransferase	DCAF16	Whole_Blood	4:17980202:CS1	0.955655	0.165565	-0.0246411	0.192455	0.0261876	0.00405692	rs12640250
Alanine Aminotransferase	LCORL	Adipose_Subcutaneous	4:17980202:CS1	0.955655	0.165565	0.0585456	0.296276	0.0261876	0.00405692	rs12640250
Alanine Aminotransferase	LCORL	Esophagus_Junction	4:17980202:CS1	0.955655	0.165565	0.118491	0.700415	0.0261876	0.00405692	rs12640250
Alanine Aminotransferase	LCORL	Fibroblasts	4:17980202:CS1	0.955655	0.165565	0.0411294	0.240331	0.0261876	0.00405692	rs12640250
Alanine Aminotransferase	chr4:17504475:17509271:clu_38716:ENSG00000151552.11	Pituitary	4:17980202:CS1	0.955655	0.165565	0.0841476	0.492307	0.0261876	0.00405692	rs12640250
Alanine Aminotransferase	chr4:37454040:37558027:clu_31020:ENSG00000154274.14	Pancreas	4:37482779:CS1	0.979274	0.0836485	-0.0121644	0.05102	0.0297924	0.00192498	rs11724920~rs2973267~rs73228746
Alanine Aminotransferase	chr4:37454040:37558027:clu_35491:ENSG00000154274.14	Stomach	4:37482779:CS1	0.979274	0.0836485	-0.0449454	0.127051	0.109296	0.00814071	rs1600393~rs11724920~rs6846903
Alanine Aminotransferase	chr4:37454040:37558027:clu_38977:ENSG00000154274.14	Colon_Transverse	4:37482779:CS1	0.979274	0.0836485	-0.0161961	0.0910535	0.0416336	0.00277864	rs11724920~rs2973267~rs73228746
Alanine Aminotransferase	chr4:37487459:37558027:clu_31020:ENSG00000154274.14	Pancreas	4:37482779:CS1	0.979274	0.0836485	0.214221	0.27184	0.391161	0.0322822	rs7672435~rs11724920
Alanine Aminotransferase	ENSG00000250376	Small_Intestine	4:69357050:CS1	0.96791	0.113183	0.50965	1.79569	0.0800957	0.00935337	rs34248556
Alanine Aminotransferase	ENSG00000250566	Small_Intestine	4:69357050:CS1	0.96791	0.113183	-0.117167	0.437676	0.0800957	0.00935337	rs34248556
Alanine Aminotransferase	ENSG00000251074	Stomach	4:69357050:CS1	0.96791	0.113183	0.188446	0.625031	0.0800957	0.00935337	rs34248556
Alanine Aminotransferase	UGT2B15	Colon_Transverse	4:69357050:CS1	0.96791	0.113183	-0.0551122	0.203969	0.0800957	0.00935337	rs34248556
Alanine Aminotransferase	UGT2B15	Lymphocytes	4:69357050:CS1	0.96791	0.113183	-0.0914253	0.370969	0.0624055	0.00743604	rs34248556~rs35057908
Alanine Aminotransferase	UGT2B15	Small_Intestine	4:69357050:CS1	0.96791	0.113183	-0.0991852	0.372694	0.0800957	0.00935337	rs34248556
Alanine Aminotransferase	UGT2B17	Esophagus_Mucosa	4:69357050:CS1	0.96791	0.113183	-0.092392	0.327419	0.0800957	0.00935337	rs34248556
Alanine Aminotransferase	UGT2B17	Lung	4:69357050:CS1	0.96791	0.113183	-0.0682871	0.206117	0.0800957	0.00935337	rs34248556
Alanine Aminotransferase	UGT2B17	Lymphocytes	4:69357050:CS1	0.96791	0.113183	-0.0366497	0.248422	0.0248056	0.00281387	rs34248556~rs35057908
Alanine Aminotransferase	UGT2B17	Pancreas	4:69357050:CS1	0.96791	0.113183	-0.137309	0.477022	0.0800957	0.00935337	rs34248556
Alanine Aminotransferase	UGT2B17	Small_Intestine	4:69357050:CS1	0.96791	0.113183	-0.0808777	0.272468	0.0800957	0.00935337	rs34248556
Alanine Aminotransferase	UGT2B17	Spleen	4:69357050:CS1	0.96791	0.113183	-0.0766201	0.209275	0.0800957	0.00935337	rs34248556
Alanine Aminotransferase	UGT2B17	Whole_Blood	4:69357050:CS1	0.96791	0.113183	-0.0588747	0.230774	0.0797423	0.00939934	rs4272079~rs34248556
Alanine Aminotransferase	C4orf36	Adipose_Subcutaneous	4:86812438:CS1	0.972291	0.137748	0.362479	1.28782	0.0658922	0.00860871	rs7678571
Alanine Aminotransferase	C4orf36	Lung	4:86812438:CS1	0.972291	0.137748	-0.164315	0.681172	0.0658922	0.00860871	rs7678571
Alanine Aminotransferase	ENSG00000251411	Stomach	4:86812438:CS1	0.972291	0.137748	0.0974433	0.558343	0.0374058	0.00489279	rs7678571~rs55698195
Alanine Aminotransferase	chr4:87305308:87310243:clu_40357:ENSG00000170509.11	Adipose_Visceral	4:86812438:CS1	0.972291	0.137748	0.62716	0.530911	0.605424	0.0898115	rs7678571~rs75825429
Alanine Aminotransferase	chr4:87305308:87310243:clu_41574:ENSG00000170509.11	Adipose_Subcutaneous	4:86812438:CS1	0.972291	0.137748	0.0707695	0.2704	0.0658922	0.00860871	rs7678571
Alanine Aminotransferase	chr4:87310359:87313823:clu_40357:ENSG00000170509.11	Adipose_Visceral	4:86812438:CS1	0.972291	0.137748	-0.0941011	0.416581	0.0658922	0.00860871	rs7678571
Alanine Aminotransferase	chr4:87310359:87313823:clu_41574:ENSG00000170509.11	Adipose_Subcutaneous	4:86812438:CS1	0.972291	0.137748	-0.077859	0.30624	0.0658922	0.00860871	rs7678571
Alanine Aminotransferase	HSD17B13	Brain_Cortex	4:88183820:CS1	1	0.452162	-0.539248	1.2131	0.166667	0.0753603	rs72613567
Alanine Aminotransferase	HSD17B13	Pituitary	4:88183820:CS1	1	0.452162	-0.584116	1.27962	0.166667	0.0753603	rs72613567
Alanine Aminotransferase	chr4:87305308:87310243:clu_40357:ENSG00000170509.11	Adipose_Visceral	4:88183820:CS1	1	0.452162	0.347208	0.778093	0.166667	0.0753603	rs72613567
Alanine Aminotransferase	chr4:87305308:87310243:clu_41574:ENSG00000170509.11	Adipose_Subcutaneous	4:88183820:CS1	1	0.452162	0.324393	0.76997	0.166667	0.0753603	rs72613567
Alanine Aminotransferase	chr4:87310359:87313823:clu_40357:ENSG00000170509.11	Adipose_Visceral	4:88183820:CS1	1	0.452162	-0.379131	0.835965	0.166667	0.0753603	rs72613567
Alanine Aminotransferase	chr4:87310359:87313823:clu_41574:ENSG00000170509.11	Adipose_Subcutaneous	4:88183820:CS1	1	0.452162	-0.330179	0.699058	0.166667	0.0753603	rs72613567
Alanine Aminotransferase	MTTP	Heart_Left_Ventricle	4:100487315:CS1	0.999904	0.104482	1.77993	0.306059	0.999904	0.104482	rs7436128
Alanine Aminotransferase	chr4:99347846:99352658:clu_36783:ENSG00000248144.5	Muscle_Skeletal	4:100487315:CS2	0.999621	0.100222	-0.499868	0.0843847	0.999621	0.100222	rs34394283~rs1693435~rs3762896
Alanine Aminotransferase	ENSG00000279845	Artery_Tibial	4:145659064:CS1	1	0.232887	5.48905	9.2593	0.25	0.0582216	rs4835022
Alanine Aminotransferase	ZNF827	Adipose_Visceral	4:145659064:CS1	1	0.232887	1.79143	3.13958	0.25	0.0582216	rs4835022
Alanine Aminotransferase	ZNF827	Artery_Aorta	4:145659064:CS1	1	0.232887	0.678195	1.19908	0.25	0.0582216	rs4835022
Alanine Aminotransferase	chr4:146183015:146187274:clu_36559:ENSG00000164167.10	Stomach	4:145659064:CS1	1	0.232887	5.35831	9.35239	0.25	0.0582216	rs4835022
Alanine Aminotransferase	ENSG00000279481	Adipose_Subcutaneous	4:145659064:CS2	1	0.0858695	0.321189	0.790949	0.142857	0.0122671	rs111232081
Alanine Aminotransferase	ENSG00000279481	Artery_Tibial	4:145659064:CS2	1	0.0858695	0.31144	0.793052	0.142857	0.0122671	rs111232081
Alanine Aminotransferase	ENSG00000279481	Colon_Transverse	4:145659064:CS2	1	0.0858695	0.63916	1.59043	0.142857	0.0122671	rs111232081
Alanine Aminotransferase	ENSG00000279481	Esophagus_Muscularis	4:145659064:CS2	1	0.0858695	0.893048	2.15436	0.142857	0.0122671	rs111232081
Alanine Aminotransferase	ENSG00000279481	Lung	4:145659064:CS2	1	0.0858695	0.443308	1.11165	0.142857	0.0122671	rs111232081
Alanine Aminotransferase	ENSG00000279481	Thyroid	4:145659064:CS2	1	0.0858695	0.482833	1.08905	0.142857	0.0122671	rs111232081
Alanine Aminotransferase	chr4:146256520:146258692:clu_38466:ENSG00000120519.14	Esophagus_Muscularis	4:145659064:CS2	1	0.0858695	1.63118	3.85398	0.142857	0.0122671	rs111232081
Alanine Aminotransferase	ZNF827	Pancreas	4:146821410:CS1	1	0.572988	3.40031	3.40199	0.500001	0.286494	rs4835265
Alanine Aminotransferase	chr4:146510049:146517038:clu_37274:ENSG00000120519.14	Muscle_Skeletal	4:146821410:CS1	1	0.572988	-5.86966	5.89172	0.500001	0.286494	rs4835265
Alanine Aminotransferase	HHIP	Nerve_Tibial	4:146821410:CS2	0.98422	0.0340288	0.21405	0.489821	0.172413	0.00522238	rs6842499~rs115882505~rs7678954
Alanine Aminotransferase	HHIP	Thyroid	4:146821410:CS2	0.98422	0.0340288	0.44257	1.04377	0.157143	0.00561483	rs4240326~rs6842499
Alanine Aminotransferase	OTUD4	Fibroblasts	4:146821410:CS2	0.98422	0.0340288	0.356774	0.538956	0.327332	0.0115958	rs6842499
Alanine Aminotransferase	OTUD4	Kidney_Tube	4:146821410:CS2	0.98422	0.0340288	0.500366	0.735613	0.327332	0.0115958	rs6842499
Alanine Aminotransferase	CDH6	Kidney_Tube	5:31021358:CS1	1	0.380043	1.56514	0.1574	1	0.380043	rs10075805
Alanine Aminotransferase	ITGA1	Colon_Transverse	5:52193125:CS1	0.973664	0.186036	0.0342604	0.237002	0.0202242	0.0038643	rs4074793
Alanine Aminotransferase	ITGA1	Esophagus_Junction	5:52193125:CS1	0.973664	0.186036	0.0274969	0.191393	0.0202242	0.0038643	rs4074793
Alanine Aminotransferase	ITGA1	Esophagus_Mucosa	5:52193125:CS1	0.973664	0.186036	0.0322921	0.182778	0.0202242	0.0038643	rs4074793
Alanine Aminotransferase	ITGA1	Esophagus_Muscularis	5:52193125:CS1	0.973664	0.186036	0.0257188	0.159081	0.0202242	0.0038643	rs4074793
Alanine Aminotransferase	ITGA1	Heart_Atrial_Appendage	5:52193125:CS1	0.973664	0.186036	0.0746231	0.605744	0.0202242	0.0038643	rs4074793
Alanine Aminotransferase	ITGA1	Heart_Left_Ventricle	5:52193125:CS1	0.973664	0.186036	0.0927456	0.675674	0.0202242	0.0038643	rs4074793
Alanine Aminotransferase	ITGA1	Kidney_Tube	5:52193125:CS1	0.973664	0.186036	-0.0311727	0.145162	0.0202242	0.0038643	rs4074793
Alanine Aminotransferase	ITGA1	Pancreas	5:52193125:CS1	0.973664	0.186036	0.0609699	0.413922	0.0202242	0.0038643	rs4074793
Alanine Aminotransferase	ITGA1	Spleen	5:52193125:CS1	0.973664	0.186036	0.0378258	0.206676	0.0202242	0.0038643	rs4074793
Alanine Aminotransferase	ITGA1	Stomach	5:52193125:CS1	0.973664	0.186036	0.0346268	0.290968	0.0202242	0.0038643	rs4074793
Alanine Aminotransferase	ITGA1	Thyroid	5:52193125:CS1	0.973664	0.186036	0.0354747	0.238666	0.0202242	0.0038643	rs4074793
Alanine Aminotransferase	chr5:52788414:52849365:clu_33003:ENSG00000152684.10	Esophagus_Junction	5:52193125:CS1	0.973664	0.186036	0.0314821	0.145828	0.0202242	0.0038643	rs4074793
Alanine Aminotransferase	chr5:52788414:52849365:clu_33003:ENSG00000213949.8	Esophagus_Junction	5:52193125:CS1	0.973664	0.186036	0.0314542	0.210613	0.0202242	0.0038643	rs4074793
Alanine Aminotransferase	chr5:52788414:52849365:clu_33733:ENSG00000152684.10	Colon_Sigmoid	5:52193125:CS1	0.973664	0.186036	0.0418737	0.368389	0.0202242	0.0038643	rs4074793
Alanine Aminotransferase	chr5:52788414:52849365:clu_33733:ENSG00000213949.8	Colon_Sigmoid	5:52193125:CS1	0.973664	0.186036	0.0418094	0.272362	0.0202242	0.0038643	rs4074793
Alanine Aminotransferase	chr5:52788414:52849365:clu_34848:ENSG00000152684.10	Esophagus_Muscularis	5:52193125:CS1	0.973664	0.186036	0.0269051	0.180669	0.0202242	0.0038643	rs4074793
Alanine Aminotransferase	chr5:52788414:52849365:clu_34848:ENSG00000213949.8	Esophagus_Muscularis	5:52193125:CS1	0.973664	0.186036	0.0268852	0.195619	0.0202242	0.0038643	rs4074793
Alanine Aminotransferase	chr5:52893840:52897286:clu_30921:ENSG00000213949.8	Artery_Coronary	5:52193125:CS1	0.973664	0.186036	0.0295144	0.203725	0.0202242	0.0038643	rs4074793
Alanine Aminotransferase	chr5:52893840:52897286:clu_33005:ENSG00000213949.8	Esophagus_Junction	5:52193125:CS1	0.973664	0.186036	0.0203019	0.184298	0.0202242	0.0038643	rs4074793
Alanine Aminotransferase	chr5:52893840:52897286:clu_33735:ENSG00000213949.8	Colon_Sigmoid	5:52193125:CS1	0.973664	0.186036	0.0245558	0.174548	0.0231242	0.00441376	rs4074793~rs79525479
Alanine Aminotransferase	chr5:52893840:52897286:clu_34850:ENSG00000213949.8	Esophagus_Muscularis	5:52193125:CS1	0.973664	0.186036	0.0176192	0.130305	0.0202242	0.0038643	rs4074793
Alanine Aminotransferase	chr5:52893840:52897286:clu_35249:ENSG00000213949.8	Artery_Tibial	5:52193125:CS1	0.973664	0.186036	0.0144398	0.0648003	0.0202242	0.0038643	rs4074793
Alanine Aminotransferase	chr5:52893840:52897455:clu_30696:ENSG00000213949.8	Fibroblasts	5:52193125:CS1	0.973664	0.186036	-0.0262633	0.196985	0.0202242	0.0038643	rs4074793
Alanine Aminotransferase	chr5:52893840:52897455:clu_30921:ENSG00000213949.8	Artery_Coronary	5:52193125:CS1	0.973664	0.186036	-0.0266474	0.206597	0.0202242	0.0038643	rs4074793
Alanine Aminotransferase	chr5:52893840:52897455:clu_33005:ENSG00000213949.8	Esophagus_Junction	5:52193125:CS1	0.973664	0.186036	-0.019117	0.131627	0.0202242	0.0038643	rs4074793
Alanine Aminotransferase	chr5:52893840:52897455:clu_34850:ENSG00000213949.8	Esophagus_Muscularis	5:52193125:CS1	0.973664	0.186036	-0.0169785	0.130132	0.0202242	0.0038643	rs4074793
Alanine Aminotransferase	chr5:52893840:52897455:clu_35249:ENSG00000213949.8	Artery_Tibial	5:52193125:CS1	0.973664	0.186036	-0.0136674	0.0866041	0.0202242	0.0038643	rs4074793
Alanine Aminotransferase	chr5:52893840:52897455:clu_36440:ENSG00000213949.8	Colon_Transverse	5:52193125:CS1	0.973664	0.186036	-0.0201577	0.128772	0.0202242	0.0038643	rs4074793
Alanine Aminotransferase	chr5:52893840:52897455:clu_37109:ENSG00000213949.8	Adipose_Visceral	5:52193125:CS1	0.973664	0.186036	-0.0371885	0.317647	0.0202242	0.0038643	rs4074793
Alanine Aminotransferase	chr5:52893840:52897455:clu_38205:ENSG00000213949.8	Adipose_Subcutaneous	5:52193125:CS1	0.973664	0.186036	-0.0233915	0.20358	0.0202242	0.0038643	rs4074793
Alanine Aminotransferase	chr5:52893840:52897455:clu_40797:ENSG00000213949.8	Thyroid	5:52193125:CS1	0.973664	0.186036	-0.0260077	0.194499	0.0202242	0.0038643	rs4074793
Alanine Aminotransferase	chr5:52918898:52922777:clu_35250:ENSG00000213949.8	Artery_Tibial	5:52193125:CS1	0.973664	0.186036	0.0716573	0.706959	0.0202242	0.0038643	rs4074793
Alanine Aminotransferase	chr5:52920468:52922777:clu_30697:ENSG00000213949.8	Fibroblasts	5:52193125:CS1	0.973664	0.186036	-0.0265147	0.187016	0.0202242	0.0038643	rs4074793
Alanine Aminotransferase	chr5:52920468:52922777:clu_30923:ENSG00000213949.8	Artery_Coronary	5:52193125:CS1	0.973664	0.186036	-0.0390546	0.275512	0.0202242	0.0038643	rs4074793
Alanine Aminotransferase	chr5:52920468:52922777:clu_33656:ENSG00000213949.8	Artery_Aorta	5:52193125:CS1	0.973664	0.186036	-0.0222095	0.163084	0.0202242	0.0038643	rs4074793
Alanine Aminotransferase	chr5:52920468:52922777:clu_34851:ENSG00000213949.8	Esophagus_Muscularis	5:52193125:CS1	0.973664	0.186036	-0.0216804	0.07338	0.0202242	0.0038643	rs4074793
Alanine Aminotransferase	chr5:52920468:52922777:clu_35250:ENSG00000213949.8	Artery_Tibial	5:52193125:CS1	0.973664	0.186036	-0.0202467	0.155513	0.0202242	0.0038643	rs4074793
Alanine Aminotransferase	chr5:52920468:52922777:clu_38209:ENSG00000213949.8	Adipose_Subcutaneous	5:52193125:CS1	0.973664	0.186036	-0.0341929	0.140942	0.0202242	0.0038643	rs4074793
Alanine Aminotransferase	chr5:52920468:52922777:clu_40358:ENSG00000213949.8	Lung	5:52193125:CS1	0.973664	0.186036	-0.0345689	0.243847	0.0202242	0.0038643	rs4074793
Alanine Aminotransferase	chr5:52920472:52922777:clu_30697:ENSG00000213949.8	Fibroblasts	5:52193125:CS1	0.973664	0.186036	0.0265415	0.190129	0.0202242	0.0038643	rs4074793
Alanine Aminotransferase	chr5:52920472:52922777:clu_33007:ENSG00000213949.8	Esophagus_Junction	5:52193125:CS1	0.973664	0.186036	0.0392638	0.287893	0.0202242	0.0038643	rs4074793
Alanine Aminotransferase	chr5:52920472:52922777:clu_33269:ENSG00000213949.8	Heart_Atrial_Appendage	5:52193125:CS1	0.973664	0.186036	0.166822	0.950399	0.0202242	0.0038643	rs4074793
Alanine Aminotransferase	chr5:52920472:52922777:clu_33656:ENSG00000213949.8	Artery_Aorta	5:52193125:CS1	0.973664	0.186036	0.0201298	0.152601	0.0202242	0.0038643	rs4074793
Alanine Aminotransferase	chr5:52920472:52922777:clu_34851:ENSG00000213949.8	Esophagus_Muscularis	5:52193125:CS1	0.973664	0.186036	0.0196759	0.127834	0.0202242	0.0038643	rs4074793
Alanine Aminotransferase	chr5:52920472:52922777:clu_35250:ENSG00000213949.8	Artery_Tibial	5:52193125:CS1	0.973664	0.186036	0.0172699	0.119756	0.0202242	0.0038643	rs4074793
Alanine Aminotransferase	chr5:52920472:52922777:clu_37110:ENSG00000213949.8	Adipose_Visceral	5:52193125:CS1	0.973664	0.186036	0.0315244	0.212751	0.0202242	0.0038643	rs4074793
Alanine Aminotransferase	chr5:52920472:52922777:clu_40358:ENSG00000213949.8	Lung	5:52193125:CS1	0.973664	0.186036	0.0242294	0.155257	0.0202242	0.0038643	rs4074793
Alanine Aminotransferase	chr5:52920472:52922777:clu_40794:ENSG00000213949.8	Thyroid	5:52193125:CS1	0.973664	0.186036	0.0423034	0.30722	0.0202242	0.0038643	rs4074793
Alanine Aminotransferase	chr5:58993465:59038859:clu_30341:ENSG00000113448.18	Whole_Blood	5:58943460:CS1	0.970628	0.293336	-4.91459	1.34159	0.970628	0.293336	rs298023
Alanine Aminotransferase	ARHGEF28	Esophagus_Mucosa	5:72159179:CS1	0.999998	0.168556	0.276655	0.437885	0.302279	0.0502109	rs819544~rs888655
Alanine Aminotransferase	ARHGEF28	Liver	5:72159179:CS1	0.999998	0.168556	0.455781	0.512352	0.445522	0.0759116	rs888655
Alanine Aminotransferase	ARHGEF28	Pancreas	5:72159179:CS1	0.999998	0.168556	0.258249	0.451727	0.252197	0.0424332	rs888655~rs2973544
Alanine Aminotransferase	FCHO2	Kidney_Tube	5:72159179:CS2	0.971412	0.140929	-0.34585	0.493206	0.323804	0.0469762	rs4704043
Alanine Aminotransferase	chr5:72893535:72893616:clu_33977:ENSG00000083312.17	Colon_Sigmoid	5:72159179:CS2	0.971412	0.140929	1.37595	2.00319	0.323804	0.0469762	rs4704043
Alanine Aminotransferase	chr5:72893703:72896458:clu_33977:ENSG00000083312.17	Colon_Sigmoid	5:72159179:CS2	0.971412	0.140929	-1.46673	2.22914	0.323804	0.0469762	rs4704043
Alanine Aminotransferase	EFNA5	Nerve_Tibial	5:106878792:CS1	1	0.275428	-15.8361	2.26463	1	0.275428	rs6879279
Alanine Aminotransferase	ENSG00000176857	Lymphocytes	5:106878792:CS2	0.99948	0.171993	-4.57557	9.12648	0.199896	0.0343986	rs288139
Alanine Aminotransferase	FER	Artery_Coronary	5:106878792:CS2	0.99948	0.171993	-1.32907	2.53558	0.199896	0.0343986	rs288139
Alanine Aminotransferase	chr5:108832943:108835708:clu_33568:ENSG00000151422.12	Esophagus_Junction	5:106878792:CS2	0.99948	0.171993	0.657302	1.38329	0.199896	0.0343986	rs288139
Alanine Aminotransferase	chr5:108946222:108954729:clu_35933:ENSG00000151422.12	Artery_Tibial	5:106878792:CS2	0.99948	0.171993	0.352014	0.740754	0.199896	0.0343986	rs288139
Alanine Aminotransferase	chr5:108954932:108959225:clu_35933:ENSG00000151422.12	Artery_Tibial	5:106878792:CS2	0.99948	0.171993	-1.0886	2.25243	0.199896	0.0343986	rs288139
Alanine Aminotransferase	chr5:108364995:108367831:clu_40003:ENSG00000145743.15	Nerve_Tibial	5:106878792:CS3	0.999821	0.141771	3.52988	3.7188	0.49991	0.0708854	rs352606
Alanine Aminotransferase	chr5:108367953:108380699:clu_40003:ENSG00000145743.15	Nerve_Tibial	5:106878792:CS3	0.999821	0.141771	-3.60632	3.79091	0.49991	0.0708854	rs352606
Alanine Aminotransferase	SLC12A2-DT	Adipose_Subcutaneous	5:127406259:CS1	0.976798	0.154745	0.0263598	0.134049	0.0417912	0.00658587	rs2250127
Alanine Aminotransferase	SLC12A2-DT	Adipose_Visceral	5:127406259:CS1	0.976798	0.154745	0.0303487	0.172238	0.0417912	0.00658587	rs2250127
Alanine Aminotransferase	SLC12A2-DT	Adrenal_Gland	5:127406259:CS1	0.976798	0.154745	0.0531952	0.257188	0.0417912	0.00658587	rs2250127
Alanine Aminotransferase	SLC12A2-DT	Artery_Aorta	5:127406259:CS1	0.976798	0.154745	0.034278	0.165111	0.0417912	0.00658587	rs2250127
Alanine Aminotransferase	SLC12A2-DT	Artery_Coronary	5:127406259:CS1	0.976798	0.154745	0.0487074	0.25679	0.0417912	0.00658587	rs2250127
Alanine Aminotransferase	SLC12A2-DT	Artery_Tibial	5:127406259:CS1	0.976798	0.154745	0.0296341	0.160337	0.0417912	0.00658587	rs2250127
Alanine Aminotransferase	SLC12A2-DT	Colon_Sigmoid	5:127406259:CS1	0.976798	0.154745	0.0404606	0.22892	0.0417912	0.00658587	rs2250127
Alanine Aminotransferase	SLC12A2-DT	Colon_Transverse	5:127406259:CS1	0.976798	0.154745	0.0403808	0.231513	0.0417912	0.00658587	rs2250127
Alanine Aminotransferase	SLC12A2-DT	Esophagus_Junction	5:127406259:CS1	0.976798	0.154745	0.0402718	0.158671	0.0417912	0.00658587	rs2250127
Alanine Aminotransferase	SLC12A2-DT	Esophagus_Mucosa	5:127406259:CS1	0.976798	0.154745	0.0281968	0.117085	0.0417912	0.00658587	rs2250127
Alanine Aminotransferase	SLC12A2-DT	Esophagus_Muscularis	5:127406259:CS1	0.976798	0.154745	0.0347879	0.205472	0.0417912	0.00658587	rs2250127
Alanine Aminotransferase	SLC12A2-DT	Fibroblasts	5:127406259:CS1	0.976798	0.154745	0.0281691	0.147531	0.0417912	0.00658587	rs2250127
Alanine Aminotransferase	SLC12A2-DT	Heart_Atrial_Appendage	5:127406259:CS1	0.976798	0.154745	0.0376856	0.194254	0.0417912	0.00658587	rs2250127
Alanine Aminotransferase	SLC12A2-DT	Kidney_Glom	5:127406259:CS1	0.976798	0.154745	0.0636801	0.321202	0.0417912	0.00658587	rs2250127
Alanine Aminotransferase	SLC12A2-DT	Liver	5:127406259:CS1	0.976798	0.154745	0.0439728	0.213296	0.0417912	0.00658587	rs2250127
Alanine Aminotransferase	SLC12A2-DT	Lung	5:127406259:CS1	0.976798	0.154745	0.0305395	0.115385	0.0417912	0.00658587	rs2250127
Alanine Aminotransferase	SLC12A2-DT	Muscle_Skeletal	5:127406259:CS1	0.976798	0.154745	0.0295663	0.113417	0.0573911	0.00985601	rs2190797~rs2250127
Alanine Aminotransferase	SLC12A2-DT	Nerve_Tibial	5:127406259:CS1	0.976798	0.154745	0.0288342	0.111718	0.0417912	0.00658587	rs2250127
Alanine Aminotransferase	SLC12A2-DT	Pancreas	5:127406259:CS1	0.976798	0.154745	0.038649	0.158058	0.0417912	0.00658587	rs2250127
Alanine Aminotransferase	SLC12A2-DT	Pituitary	5:127406259:CS1	0.976798	0.154745	0.0566962	0.29593	0.0417912	0.00658587	rs2250127
Alanine Aminotransferase	SLC12A2-DT	Spleen	5:127406259:CS1	0.976798	0.154745	0.0597047	0.296853	0.0417912	0.00658587	rs2250127
Alanine Aminotransferase	SLC12A2-DT	Thyroid	5:127406259:CS1	0.976798	0.154745	0.0285872	0.116246	0.0417912	0.00658587	rs2250127
Alanine Aminotransferase	SLC12A2-DT	Whole_Blood	5:127406259:CS1	0.976798	0.154745	0.0456555	0.217075	0.0417912	0.00658587	rs2250127
Alanine Aminotransferase	ENSG00000224431	Artery_Tibial	5:130218070:CS1	0.999631	0.243106	-1.4314	3.58021	0.142804	0.0347294	rs244737
Alanine Aminotransferase	FNIP1	Artery_Aorta	5:130218070:CS1	0.999631	0.243106	0.233748	0.613007	0.142804	0.0347294	rs244737
Alanine Aminotransferase	RAPGEF6	Fibroblasts	5:130218070:CS1	0.999631	0.243106	0.211252	0.556365	0.142804	0.0347294	rs244737
Alanine Aminotransferase	chr5:131464281:131469801:clu_30866:ENSG00000158987.20	Brain_Cortex	5:130218070:CS1	0.999631	0.243106	0.728154	1.79853	0.142804	0.0347294	rs244737
Alanine Aminotransferase	chr5:131464281:131472587:clu_30866:ENSG00000158987.20	Brain_Cortex	5:130218070:CS1	0.999631	0.243106	-1.31855	3.35278	0.142804	0.0347294	rs244737
Alanine Aminotransferase	chr5:131719417:131730904:clu_35725:ENSG00000217128.11	Esophagus_Muscularis	5:130218070:CS1	0.999631	0.243106	-0.863627	1.98364	0.142804	0.0347294	rs244737
Alanine Aminotransferase	chr5:132390904:132392433:clu_25897:ENSG00000197375.12	Liver	5:130218070:CS1	0.999631	0.243106	-2.62771	6.21681	0.142804	0.0347294	rs244737
Alanine Aminotransferase	ENSG00000235253	Artery_Aorta	5:131320462:CS1	0.99967	0.0873393	-1.19369	2.67617	0.172714	0.0151271	rs55747751
Alanine Aminotransferase	HSPA4	Artery_Tibial	5:131320462:CS1	0.99967	0.0873393	0.218957	0.477233	0.172714	0.0151271	rs55747751
Alanine Aminotransferase	HSPA4	Islets	5:131320462:CS1	0.99967	0.0873393	0.0950806	0.249635	0.125904	0.0110181	rs30178~rs55747751
Alanine Aminotransferase	HSPA4	Lung	5:131320462:CS1	0.99967	0.0873393	0.207063	0.48077	0.18291	0.0158129	rs12517292~rs55747751
Alanine Aminotransferase	HSPA4	Lymphocytes	5:131320462:CS1	0.99967	0.0873393	1.12336	2.31369	0.172714	0.0151271	rs55747751
Alanine Aminotransferase	HSPA4	Whole_Blood	5:131320462:CS1	0.99967	0.0873393	0.149652	0.35527	0.172714	0.0151271	rs55747751
Alanine Aminotransferase	HSPA4	Artery_Tibial	5:132444128:CS1	0.999976	0.091389	0.512348	0.747599	0.333325	0.030463	rs72801474
Alanine Aminotransferase	HSPA4	Lung	5:132444128:CS1	0.999976	0.091389	0.515603	0.737569	0.333325	0.030463	rs72801474
Alanine Aminotransferase	HSPA4	Whole_Blood	5:132444128:CS1	0.999976	0.091389	0.328093	0.46974	0.333325	0.030463	rs72801474
Alanine Aminotransferase	ENSG00000197536	Adipose_Visceral	5:132444128:CS2	0.95016	0.049624	0.000380451	0	0.000620278	2.11085e-05	rs6873269
Alanine Aminotransferase	ENSG00000197536	Adrenal_Gland	5:132444128:CS2	0.95016	0.049624	0.00232978	0	0.000620278	2.11085e-05	rs6873269
Alanine Aminotransferase	ENSG00000197536	Artery_Aorta	5:132444128:CS2	0.95016	0.049624	0.000318323	0	0.000620278	2.11085e-05	rs6873269
Alanine Aminotransferase	ENSG00000234290	Whole_Blood	5:132444128:CS2	0.95016	0.049624	0.000298477	0	0.000620278	2.11085e-05	rs6873269
Alanine Aminotransferase	chr5:132198932:132203748:clu_35732:ENSG00000072682.18	Esophagus_Muscularis	5:132444128:CS2	0.95016	0.049624	0.17019	0.561246	0.078808	0.00412253	rs6894249
Alanine Aminotransferase	chr5:132203847:132204082:clu_35732:ENSG00000072682.18	Esophagus_Muscularis	5:132444128:CS2	0.95016	0.049624	-0.16422	0.641985	0.078808	0.00412253	rs6894249
Alanine Aminotransferase	chr5:132449689:132470040:clu_31084:ENSG00000197536.11	Whole_Blood	5:132444128:CS2	0.95016	0.049624	-0.0807433	0.284692	0.078808	0.00412253	rs6894249
Alanine Aminotransferase	chr5:132449689:132470040:clu_32544:ENSG00000197536.11	Spleen	5:132444128:CS2	0.95016	0.049624	-0.199629	0.586046	0.078808	0.00412253	rs6894249
Alanine Aminotransferase	chr5:132449689:132470040:clu_36184:ENSG00000113522.13	Artery_Tibial	5:132444128:CS2	0.95016	0.049624	-0.329426	1.27805	0.078808	0.00412253	rs6894249
Alanine Aminotransferase	chr5:132449689:132470040:clu_36184:ENSG00000197536.11	Artery_Tibial	5:132444128:CS2	0.95016	0.049624	-0.313675	1.14644	0.078808	0.00412253	rs6894249
Alanine Aminotransferase	chr5:132449689:132470040:clu_40280:ENSG00000113522.13	Nerve_Tibial	5:132444128:CS2	0.95016	0.049624	-0.109376	0.395397	0.078808	0.00412253	rs6894249
Alanine Aminotransferase	chr5:132449689:132470040:clu_40280:ENSG00000197536.11	Nerve_Tibial	5:132444128:CS2	0.95016	0.049624	-0.110899	0.396272	0.078808	0.00412253	rs6894249
Alanine Aminotransferase	chr5:132449689:132486192:clu_36184:ENSG00000197536.11	Artery_Tibial	5:132444128:CS2	0.95016	0.049624	0.000256926	0	0.000620278	2.11085e-05	rs6873269
Alanine Aminotransferase	chr5:132471054:132475667:clu_31084:ENSG00000197536.11	Whole_Blood	5:132444128:CS2	0.95016	0.049624	-0.0603764	0.185103	0.078808	0.00412253	rs6894249
Alanine Aminotransferase	chr5:132471054:132475667:clu_39255:ENSG00000113522.13	Adipose_Subcutaneous	5:132444128:CS2	0.95016	0.049624	-0.200991	0.690414	0.078808	0.00412253	rs6894249
Alanine Aminotransferase	chr5:132471054:132475667:clu_39255:ENSG00000197536.11	Adipose_Subcutaneous	5:132444128:CS2	0.95016	0.049624	-0.209597	0.718229	0.078808	0.00412253	rs6894249
Alanine Aminotransferase	chr5:132484497:132486557:clu_41470:ENSG00000125347.13	Lung	5:132444128:CS2	0.95016	0.049624	0.335081	1.22779	0.078808	0.00412253	rs6894249
Alanine Aminotransferase	chr5:132485716:132486557:clu_38089:ENSG00000125347.13	Adipose_Visceral	5:132444128:CS2	0.95016	0.049624	0.000329375	0	0.000620278	2.11085e-05	rs6873269
Alanine Aminotransferase	chr5:132485716:132486557:clu_41894:ENSG00000125347.13	Thyroid	5:132444128:CS2	0.95016	0.049624	0.000359212	0	0.000741877	2.6947e-05	rs145194515~rs6873269
Alanine Aminotransferase	ARAP3	Muscle_Skeletal	5:140917632:CS1	0.99752	0.0720496	-2.98746	3.07763	0.49876	0.0360248	rs251023
Alanine Aminotransferase	chr5:141666643:141670512:clu_41746:ENSG00000120318.15	Lung	5:140917632:CS1	0.99752	0.0720496	-0.844734	0.881024	0.49876	0.0360248	rs251023
Alanine Aminotransferase	chr5:157460357:157463094:clu_36430:ENSG00000172548.14	Esophagus_Mucosa	5:156703572:CS1	0.976721	0.19301	2.58056	0.512047	0.976721	0.19301	rs1030270~rs180845128
Alanine Aminotransferase	CYFIP2	Liver	5:157928624:CS1	0.992631	0.145515	-0.598199	0.853515	0.330877	0.048505	rs75976622
Alanine Aminotransferase	chr5:157341157:157359005:clu_34664:ENSG00000055163.19	Heart_Atrial_Appendage	5:157928624:CS1	0.992631	0.145515	1.67365	2.48089	0.330877	0.048505	rs75976622
Alanine Aminotransferase	chr5:157354479:157359005:clu_34664:ENSG00000055163.19	Heart_Atrial_Appendage	5:157928624:CS1	0.992631	0.145515	-0.712416	1.00322	0.330877	0.048505	rs75976622
Alanine Aminotransferase	E2F3	Muscle_Skeletal	6:20404420:CS1	0.997763	0.340866	7.42104	1.0498	0.997763	0.340866	rs73382439
Alanine Aminotransferase	ENSG00000272168	Pancreas	6:21924904:CS1	1.00193	0.351211	0.706156	0.714522	0.500964	0.175605	rs112314651
Alanine Aminotransferase	chr6:22056690:22063020:clu_36692:ENSG00000272168.6	Lung	6:21924904:CS1	1.00193	0.351211	-2.06726	2.11167	0.500964	0.175605	rs112314651
Alanine Aminotransferase	SOX4	Kidney_Glom	6:21924904:CS2	0.991985	0.190973	2.48091	0.674561	0.991985	0.190973	rs12196619
Alanine Aminotransferase	ENSG00000260455	Adipose_Subcutaneous	6:21924904:CS3	0.961767	0.066743	0.083663	0.271321	0.0923992	0.00594093	rs6939950
Alanine Aminotransferase	ENSG00000260455	Artery_Aorta	6:21924904:CS3	0.961767	0.066743	0.158396	0.296083	0.222573	0.0192156	rs10946507
Alanine Aminotransferase	ENSG00000260455	Artery_Coronary	6:21924904:CS3	0.961767	0.066743	0.15473	0.534064	0.0923992	0.00594093	rs6939950
Alanine Aminotransferase	ENSG00000260455	Artery_Tibial	6:21924904:CS3	0.961767	0.066743	0.084142	0.292299	0.0923992	0.00594093	rs6939950
Alanine Aminotransferase	ENSG00000260455	Colon_Sigmoid	6:21924904:CS3	0.961767	0.066743	0.0622261	0.205999	0.0923992	0.00594093	rs6939950
Alanine Aminotransferase	ENSG00000260455	Esophagus_Muscularis	6:21924904:CS3	0.961767	0.066743	0.0607614	0.171195	0.0923992	0.00594093	rs6939950
Alanine Aminotransferase	ENSG00000260455	Lung	6:21924904:CS3	0.961767	0.066743	0.179248	0.594818	0.0923992	0.00594093	rs6939950
Alanine Aminotransferase	ENSG00000260455	Nerve_Tibial	6:21924904:CS3	0.961767	0.066743	0.0405989	0.145464	0.0923992	0.00594093	rs6939950
Alanine Aminotransferase	ENSG00000260455	Thyroid	6:21924904:CS3	0.961767	0.066743	0.0652817	0.217168	0.0923992	0.00594093	rs6939950
Alanine Aminotransferase	DEF6	Adipose_Visceral	6:35218489:CS1	0.996148	0.0586404	-0.178512	0.917801	0.0490617	0.00288558	rs10755687
Alanine Aminotransferase	DEF6	Artery_Tibial	6:35218489:CS1	0.996148	0.0586404	-0.0793614	0.353176	0.0490617	0.00288558	rs10755687
Alanine Aminotransferase	DEF6	Brain_Cerebellum	6:35218489:CS1	0.996148	0.0586404	-0.160174	0.684354	0.0490617	0.00288558	rs10755687
Alanine Aminotransferase	DEF6	Heart_Left_Ventricle	6:35218489:CS1	0.996148	0.0586404	-0.130799	0.699746	0.0490617	0.00288558	rs10755687
Alanine Aminotransferase	DEF6	Lung	6:35218489:CS1	0.996148	0.0586404	-0.198494	0.783345	0.0490617	0.00288558	rs10755687
Alanine Aminotransferase	DEF6	Nerve_Tibial	6:35218489:CS1	0.996148	0.0586404	-0.0371503	0.134224	0.0490617	0.00288558	rs10755687
Alanine Aminotransferase	DEF6	Pituitary	6:35218489:CS1	0.996148	0.0586404	-0.0519432	0.250903	0.0490617	0.00288558	rs10755687
Alanine Aminotransferase	DEF6	Thyroid	6:35218489:CS1	0.996148	0.0586404	-0.119192	0.558377	0.0490617	0.00288558	rs10755687
Alanine Aminotransferase	DEF6	Whole_Blood	6:35218489:CS1	0.996148	0.0586404	-0.03154	0.121383	0.0639753	0.00381435	rs142489096~rs10755687
Alanine Aminotransferase	TAF11	Whole_Blood	6:35218489:CS1	0.996148	0.0586404	0.26916	1.13727	0.0490617	0.00288558	rs10755687
Alanine Aminotransferase	ZNF76	Adrenal_Gland	6:35218489:CS1	0.996148	0.0586404	-0.161872	0.880474	0.0490617	0.00288558	rs10755687
Alanine Aminotransferase	ZNF76	Artery_Tibial	6:35218489:CS1	0.996148	0.0586404	-0.0466703	0.234062	0.0490617	0.00288558	rs10755687
Alanine Aminotransferase	ZNF76	Esophagus_Mucosa	6:35218489:CS1	0.996148	0.0586404	-0.0607455	0.263311	0.0490617	0.00288558	rs10755687
Alanine Aminotransferase	ZNF76	Heart_Atrial_Appendage	6:35218489:CS1	0.996148	0.0586404	-0.0853299	0.420697	0.0490617	0.00288558	rs10755687
Alanine Aminotransferase	ZNF76	Muscle_Skeletal	6:35218489:CS1	0.996148	0.0586404	-0.0459492	0.184956	0.0490617	0.00288558	rs10755687
Alanine Aminotransferase	ZNF76	Whole_Blood	6:35218489:CS1	0.996148	0.0586404	-0.0304622	0.143892	0.0490617	0.00288558	rs10755687
Alanine Aminotransferase	chr6:35233301:35237902:clu_31343:ENSG00000146197.8	Artery_Aorta	6:35218489:CS1	0.996148	0.0586404	-0.0673993	0.270957	0.0490617	0.00288558	rs10755687
Alanine Aminotransferase	chr6:35259727:35281056:clu_37972:ENSG00000065029.14	Thyroid	6:35218489:CS1	0.996148	0.0586404	-0.119068	0.578351	0.0490617	0.00288558	rs10755687
Alanine Aminotransferase	chr6:35259841:35281056:clu_37972:ENSG00000065029.14	Thyroid	6:35218489:CS1	0.996148	0.0586404	0.184613	0.772835	0.0490617	0.00288558	rs10755687
Alanine Aminotransferase	chr6:35291403:35292881:clu_30778:ENSG00000065029.14	Esophagus_Junction	6:35218489:CS1	0.996148	0.0586404	-0.177476	0.684521	0.0490617	0.00288558	rs10755687
Alanine Aminotransferase	chr6:36678798:36680474:clu_28508:ENSG00000124762.13	Fibroblasts	6:36638175:CS1	0.986273	0.0504949	-0.0354361	0.151029	0.0493136	0.00252474	rs4714001
Alanine Aminotransferase	chr6:36678798:36680474:clu_31365:ENSG00000124762.13	Muscle_Skeletal	6:36638175:CS1	0.986273	0.0504949	-0.138051	0.649205	0.0493136	0.00252474	rs4714001
Alanine Aminotransferase	chr6:36678798:36680474:clu_32758:ENSG00000124762.13	Artery_Tibial	6:36638175:CS1	0.986273	0.0504949	-0.0555866	0.243685	0.0493136	0.00252474	rs4714001
Alanine Aminotransferase	chr6:36678798:36680474:clu_34556:ENSG00000124762.13	Adipose_Visceral	6:36638175:CS1	0.986273	0.0504949	-0.0547728	0.255027	0.0493136	0.00252474	rs4714001
Alanine Aminotransferase	chr6:36678798:36680474:clu_35527:ENSG00000124762.13	Adipose_Subcutaneous	6:36638175:CS1	0.986273	0.0504949	-0.0415149	0.19918	0.0493136	0.00252474	rs4714001
Alanine Aminotransferase	chr6:36678798:36684097:clu_28508:ENSG00000124762.13	Fibroblasts	6:36638175:CS1	0.986273	0.0504949	0.0344965	0.153104	0.0493136	0.00252474	rs4714001
Alanine Aminotransferase	chr6:36678798:36684097:clu_31015:ENSG00000124762.13	Heart_Atrial_Appendage	6:36638175:CS1	0.986273	0.0504949	0.0504829	0.214326	0.0493136	0.00252474	rs4714001
Alanine Aminotransferase	chr6:36678798:36684097:clu_31413:ENSG00000124762.13	Artery_Aorta	6:36638175:CS1	0.986273	0.0504949	0.0504556	0.22719	0.0493136	0.00252474	rs4714001
Alanine Aminotransferase	chr6:36678798:36684097:clu_32702:ENSG00000124762.13	Esophagus_Mucosa	6:36638175:CS1	0.986273	0.0504949	0.0580426	0.227585	0.0493136	0.00252474	rs4714001
Alanine Aminotransferase	chr6:36678798:36684097:clu_32758:ENSG00000124762.13	Artery_Tibial	6:36638175:CS1	0.986273	0.0504949	0.0518547	0.190637	0.0493136	0.00252474	rs4714001
Alanine Aminotransferase	chr6:36678798:36684097:clu_34556:ENSG00000124762.13	Adipose_Visceral	6:36638175:CS1	0.986273	0.0504949	0.0410896	0.189822	0.0493136	0.00252474	rs4714001
Alanine Aminotransferase	chr6:36678798:36684097:clu_35527:ENSG00000124762.13	Adipose_Subcutaneous	6:36638175:CS1	0.986273	0.0504949	0.0564502	0.239631	0.0493136	0.00252474	rs4714001
Alanine Aminotransferase	chr6:36678798:36684097:clu_36491:ENSG00000124762.13	Nerve_Tibial	6:36638175:CS1	0.986273	0.0504949	0.052932	0.260068	0.0493136	0.00252474	rs4714001
Alanine Aminotransferase	chr6:36678798:36684097:clu_37523:ENSG00000124762.13	Lung	6:36638175:CS1	0.986273	0.0504949	0.0479248	0.201922	0.0493136	0.00252474	rs4714001
Alanine Aminotransferase	chr6:36678798:36684097:clu_38040:ENSG00000124762.13	Thyroid	6:36638175:CS1	0.986273	0.0504949	0.044403	0.204154	0.0493136	0.00252474	rs4714001
Alanine Aminotransferase	chr6:36678939:36680474:clu_28508:ENSG00000124762.13	Fibroblasts	6:36638175:CS1	0.986273	0.0504949	-0.0340398	0.152035	0.0493136	0.00252474	rs4714001
Alanine Aminotransferase	chr6:36678939:36684097:clu_28508:ENSG00000124762.13	Fibroblasts	6:36638175:CS1	0.986273	0.0504949	-0.06766	0.328903	0.0493136	0.00252474	rs4714001
Alanine Aminotransferase	chr6:36678939:36684097:clu_31365:ENSG00000124762.13	Muscle_Skeletal	6:36638175:CS1	0.986273	0.0504949	-0.0590465	0.298897	0.0493136	0.00252474	rs4714001
Alanine Aminotransferase	chr6:36678939:36684097:clu_32702:ENSG00000124762.13	Esophagus_Mucosa	6:36638175:CS1	0.986273	0.0504949	-0.0976688	0.365929	0.0493136	0.00252474	rs4714001
Alanine Aminotransferase	chr6:36678939:36684097:clu_37523:ENSG00000124762.13	Lung	6:36638175:CS1	0.986273	0.0504949	-0.272166	1.21815	0.0493136	0.00252474	rs4714001
Alanine Aminotransferase	ENSG00000271970	Artery_Aorta	6:43757082:CS1	0.999991	0.108913	5.14823	0.583253	0.999991	0.108913	rs4711750
Alanine Aminotransferase	CNPY3	Kidney_Glom	6:43757082:CS2	0.950952	0.0637068	0.0800946	0.548042	0.014058	0.000940837	rs9471972
Alanine Aminotransferase	CNPY3	Stomach	6:43757082:CS2	0.950952	0.0637068	-0.0211558	0.209288	0.014058	0.000940837	rs9471972
Alanine Aminotransferase	ENSG00000231113	Esophagus_Mucosa	6:43757082:CS2	0.950952	0.0637068	-0.0296187	0.173173	0.014058	0.000940837	rs9471972
Alanine Aminotransferase	ENSG00000231113	Pancreas	6:43757082:CS2	0.950952	0.0637068	-0.076982	0.788683	0.014058	0.000940837	rs9471972
Alanine Aminotransferase	ENSG00000231113	Stomach	6:43757082:CS2	0.950952	0.0637068	-0.0224029	0.162941	0.014058	0.000940837	rs9471972
Alanine Aminotransferase	ENSG00000231113	Thyroid	6:43757082:CS2	0.950952	0.0637068	-0.0179662	0.181874	0.014058	0.000940837	rs9471972
Alanine Aminotransferase	GNMT	Adipose_Subcutaneous	6:43757082:CS2	0.950952	0.0637068	0.0106084	0.0966835	0.014058	0.000940837	rs9471972
Alanine Aminotransferase	GNMT	Adipose_Visceral	6:43757082:CS2	0.950952	0.0637068	0.0141485	0.16424	0.014058	0.000940837	rs9471972
Alanine Aminotransferase	GNMT	Adrenal_Gland	6:43757082:CS2	0.950952	0.0637068	0.0180858	0.221853	0.014058	0.000940837	rs9471972
Alanine Aminotransferase	GNMT	Artery_Aorta	6:43757082:CS2	0.950952	0.0637068	0.0125523	0.113926	0.014058	0.000940837	rs9471972
Alanine Aminotransferase	GNMT	Artery_Coronary	6:43757082:CS2	0.950952	0.0637068	0.0213894	0.185869	0.014058	0.000940837	rs9471972
Alanine Aminotransferase	GNMT	Brain_Cerebellum	6:43757082:CS2	0.950952	0.0637068	0.036666	0.253927	0.0211522	0.00147867	rs9471972~rs13199873
Alanine Aminotransferase	GNMT	Colon_Transverse	6:43757082:CS2	0.950952	0.0637068	0.0159195	0.0980679	0.014058	0.000940837	rs9471972
Alanine Aminotransferase	GNMT	Esophagus_Junction	6:43757082:CS2	0.950952	0.0637068	0.00700867	0.071224	0.00765272	0.000503181	rs112836440~rs9471972
Alanine Aminotransferase	GNMT	Esophagus_Mucosa	6:43757082:CS2	0.950952	0.0637068	0.0337601	0.218087	0.014058	0.000940837	rs9471972
Alanine Aminotransferase	GNMT	Fibroblasts	6:43757082:CS2	0.950952	0.0637068	0.0229696	0.25487	0.014058	0.000940837	rs9471972
Alanine Aminotransferase	GNMT	Heart_Atrial_Appendage	6:43757082:CS2	0.950952	0.0637068	0.0131885	0.104586	0.014058	0.000940837	rs9471972
Alanine Aminotransferase	GNMT	Heart_Left_Ventricle	6:43757082:CS2	0.950952	0.0637068	0.0119667	0.0552507	0.014058	0.000940837	rs9471972
Alanine Aminotransferase	GNMT	Kidney_Tube	6:43757082:CS2	0.950952	0.0637068	0.00880684	0.0360433	0.014058	0.000940837	rs9471972
Alanine Aminotransferase	GNMT	Liver	6:43757082:CS2	0.950952	0.0637068	0.0227666	0.190257	0.014058	0.000940837	rs9471972
Alanine Aminotransferase	GNMT	Lung	6:43757082:CS2	0.950952	0.0637068	0.0112949	0.0965851	0.014058	0.000940837	rs9471972
Alanine Aminotransferase	GNMT	Pituitary	6:43757082:CS2	0.950952	0.0637068	0.0157561	0.135204	0.014058	0.000940837	rs9471972
Alanine Aminotransferase	GNMT	Small_Intestine	6:43757082:CS2	0.950952	0.0637068	0.0258968	0.254089	0.014058	0.000940837	rs9471972
Alanine Aminotransferase	GNMT	Spleen	6:43757082:CS2	0.950952	0.0637068	0.0250392	0.237549	0.014058	0.000940837	rs9471972
Alanine Aminotransferase	GNMT	Whole_Blood	6:43757082:CS2	0.950952	0.0637068	0.0116854	0.106626	0.014058	0.000940837	rs9471972
Alanine Aminotransferase	PEX6	Adipose_Subcutaneous	6:43757082:CS2	0.950952	0.0637068	-0.0104309	0.0364752	0.0157862	0.00106065	rs9471972~rs62417469
Alanine Aminotransferase	PEX6	Adipose_Visceral	6:43757082:CS2	0.950952	0.0637068	-0.010229	0.0876249	0.014058	0.000940837	rs9471972
Alanine Aminotransferase	PEX6	Adrenal_Gland	6:43757082:CS2	0.950952	0.0637068	-0.0160297	0	0.014058	0.000940837	rs9471972
Alanine Aminotransferase	PEX6	Artery_Coronary	6:43757082:CS2	0.950952	0.0637068	-0.0217469	0.191748	0.014058	0.000940837	rs9471972
Alanine Aminotransferase	PEX6	Brain_Cortex	6:43757082:CS2	0.950952	0.0637068	-0.0165865	0.156679	0.014058	0.000940837	rs9471972
Alanine Aminotransferase	PEX6	Esophagus_Junction	6:43757082:CS2	0.950952	0.0637068	-0.0122567	0.125301	0.014058	0.000940837	rs9471972
Alanine Aminotransferase	PEX6	Esophagus_Mucosa	6:43757082:CS2	0.950952	0.0637068	-0.0103036	0.0880163	0.014058	0.000940837	rs9471972
Alanine Aminotransferase	PEX6	Fibroblasts	6:43757082:CS2	0.950952	0.0637068	-0.0154514	0.126364	0.0216776	0.00148382	rs9471972~rs62417469
Alanine Aminotransferase	PEX6	Heart_Atrial_Appendage	6:43757082:CS2	0.950952	0.0637068	-0.012068	0.0945284	0.014058	0.000940837	rs9471972
Alanine Aminotransferase	PEX6	Heart_Left_Ventricle	6:43757082:CS2	0.950952	0.0637068	-0.0112959	0.0993592	0.014058	0.000940837	rs9471972
Alanine Aminotransferase	PEX6	Liver	6:43757082:CS2	0.950952	0.0637068	-0.0181202	0.18541	0.014058	0.000940837	rs9471972
Alanine Aminotransferase	PEX6	Lung	6:43757082:CS2	0.950952	0.0637068	-0.0102558	0.0903181	0.014058	0.000940837	rs9471972
Alanine Aminotransferase	PEX6	Lymphocytes	6:43757082:CS2	0.950952	0.0637068	-0.0281885	0.243681	0.014058	0.000940837	rs9471972
Alanine Aminotransferase	PEX6	Pancreas	6:43757082:CS2	0.950952	0.0637068	-0.013653	0.122521	0.014058	0.000940837	rs9471972
Alanine Aminotransferase	PEX6	Small_Intestine	6:43757082:CS2	0.950952	0.0637068	-0.0214017	0.199534	0.014058	0.000940837	rs9471972
Alanine Aminotransferase	PEX6	Spleen	6:43757082:CS2	0.950952	0.0637068	-0.0160823	0.146681	0.014058	0.000940837	rs9471972
Alanine Aminotransferase	PEX6	Stomach	6:43757082:CS2	0.950952	0.0637068	-0.0150576	0.121821	0.014058	0.000940837	rs9471972
Alanine Aminotransferase	PPP2R5D	Artery_Tibial	6:43757082:CS2	0.950952	0.0637068	0.049439	0.515771	0.014058	0.000940837	rs9471972
Alanine Aminotransferase	PPP2R5D	Colon_Transverse	6:43757082:CS2	0.950952	0.0637068	0.0246737	0.267518	0.014058	0.000940837	rs9471972
Alanine Aminotransferase	PPP2R5D	Esophagus_Muscularis	6:43757082:CS2	0.950952	0.0637068	0.0981321	0.833919	0.014058	0.000940837	rs9471972
Alanine Aminotransferase	chr6:42935670:42937717:clu_37745:ENSG00000137161.16	Lung	6:43757082:CS2	0.950952	0.0637068	0.0168956	0.127928	0.014058	0.000940837	rs9471972
Alanine Aminotransferase	chr6:42943970:42947608:clu_28675:ENSG00000124713.5	Whole_Blood	6:43757082:CS2	0.950952	0.0637068	-0.0127491	0.0480653	0.014058	0.000940837	rs9471972
Alanine Aminotransferase	chr6:42943970:42947608:clu_28675:ENSG00000231113.2	Whole_Blood	6:43757082:CS2	0.950952	0.0637068	-0.0127593	0.0754686	0.014058	0.000940837	rs9471972
Alanine Aminotransferase	chr6:42943970:42947608:clu_34148:ENSG00000124713.5	Pituitary	6:43757082:CS2	0.950952	0.0637068	-0.0211892	0.163879	0.014058	0.000940837	rs9471972
Alanine Aminotransferase	chr6:42943970:42947608:clu_34148:ENSG00000231113.2	Pituitary	6:43757082:CS2	0.950952	0.0637068	-0.0212635	0.103283	0.014058	0.000940837	rs9471972
Alanine Aminotransferase	chr6:42943970:42947608:clu_38264:ENSG00000124713.5	Thyroid	6:43757082:CS2	0.950952	0.0637068	-0.0152687	0.121679	0.014058	0.000940837	rs9471972
Alanine Aminotransferase	chr6:42943970:42947608:clu_38264:ENSG00000231113.2	Thyroid	6:43757082:CS2	0.950952	0.0637068	-0.015278	0.12505	0.014058	0.000940837	rs9471972
Alanine Aminotransferase	chr6:42943970:42962212:clu_28675:ENSG00000124713.5	Whole_Blood	6:43757082:CS2	0.950952	0.0637068	0.0129589	0.0830616	0.014058	0.000940837	rs9471972
Alanine Aminotransferase	chr6:42943970:42962212:clu_28675:ENSG00000231113.2	Whole_Blood	6:43757082:CS2	0.950952	0.0637068	0.0129687	0.1406	0.014058	0.000940837	rs9471972
Alanine Aminotransferase	chr6:42960973:42962212:clu_30802:ENSG00000124713.5	Brain_Cerebellum	6:43757082:CS2	0.950952	0.0637068	0.0127364	0.176954	0.00655806	0.000425199	rs562972889~rs9471972
Alanine Aminotransferase	chr6:42960973:42962212:clu_30802:ENSG00000231113.2	Brain_Cerebellum	6:43757082:CS2	0.950952	0.0637068	0.0127209	0	0.00653155	0.00042339	rs562972889~rs9471972
Alanine Aminotransferase	chr6:42960973:42962212:clu_34148:ENSG00000124713.5	Pituitary	6:43757082:CS2	0.950952	0.0637068	0.0327471	0.256563	0.014058	0.000940837	rs9471972
Alanine Aminotransferase	chr6:42960973:42962212:clu_34148:ENSG00000231113.2	Pituitary	6:43757082:CS2	0.950952	0.0637068	0.0328583	0.279516	0.014058	0.000940837	rs9471972
Alanine Aminotransferase	chr6:42960973:42962212:clu_38264:ENSG00000124713.5	Thyroid	6:43757082:CS2	0.950952	0.0637068	0.015967	0.168152	0.014058	0.000940837	rs9471972
Alanine Aminotransferase	chr6:42960973:42962212:clu_38264:ENSG00000231113.2	Thyroid	6:43757082:CS2	0.950952	0.0637068	0.0159752	0.135822	0.014058	0.000940837	rs9471972
Alanine Aminotransferase	chr6:42962878:42963067:clu_27500:ENSG00000124713.5	Pancreas	6:43757082:CS2	0.950952	0.0637068	-0.0253171	0.281827	0.014058	0.000940837	rs9471972
Alanine Aminotransferase	chr6:42966447:42966525:clu_36712:ENSG00000124587.13	Nerve_Tibial	6:43757082:CS2	0.950952	0.0637068	0.034231	0.325981	0.014058	0.000940837	rs9471972
Alanine Aminotransferase	chr6:42969987:42978269:clu_30085:ENSG00000124587.13	Spleen	6:43757082:CS2	0.950952	0.0637068	0.0194395	0.192088	0.014058	0.000940837	rs9471972
Alanine Aminotransferase	chr6:42969987:42978269:clu_30810:ENSG00000124587.13	Brain_Cerebellum	6:43757082:CS2	0.950952	0.0637068	0.0212686	0.191976	0.014058	0.000940837	rs9471972
Alanine Aminotransferase	chr6:42969987:42978269:clu_38271:ENSG00000124587.13	Thyroid	6:43757082:CS2	0.950952	0.0637068	0.0125751	0.0874718	0.014058	0.000940837	rs9471972
Alanine Aminotransferase	chr6:42974086:42974875:clu_31556:ENSG00000124587.13	Muscle_Skeletal	6:43757082:CS2	0.950952	0.0637068	-0.0267508	0.25901	0.014058	0.000940837	rs9471972
Alanine Aminotransferase	chr6:42974105:42974875:clu_31556:ENSG00000124587.13	Muscle_Skeletal	6:43757082:CS2	0.950952	0.0637068	0.0132401	0.105266	0.014058	0.000940837	rs9471972
Alanine Aminotransferase	chr6:42975038:42978269:clu_31557:ENSG00000124587.13	Muscle_Skeletal	6:43757082:CS2	0.950952	0.0637068	-0.0123663	0.104096	0.014058	0.000940837	rs9471972
Alanine Aminotransferase	MLIP	Adipose_Subcutaneous	6:53957588:CS1	0.996496	0.144023	-0.0833393	0.273302	0.0830413	0.0120019	rs9370260
Alanine Aminotransferase	MLIP	Adipose_Visceral	6:53957588:CS1	0.996496	0.144023	-0.216777	0.679731	0.0830413	0.0120019	rs9370260
Alanine Aminotransferase	MLIP	Colon_Transverse	6:53957588:CS1	0.996496	0.144023	-0.191493	0.642524	0.0830413	0.0120019	rs9370260
Alanine Aminotransferase	MLIP	Esophagus_Muscularis	6:53957588:CS1	0.996496	0.144023	-0.56025	1.86978	0.0830413	0.0120019	rs9370260
Alanine Aminotransferase	MLIP	Liver	6:53957588:CS1	0.996496	0.144023	-0.0751017	0.246799	0.0830413	0.0120019	rs9370260
Alanine Aminotransferase	chr6:54124865:54136715:clu_24136:ENSG00000146147.14	Liver	6:53957588:CS1	0.996496	0.144023	0.13065	0.425057	0.0830413	0.0120019	rs9370260
Alanine Aminotransferase	chr6:54124865:54160367:clu_24136:ENSG00000146147.14	Liver	6:53957588:CS1	0.996496	0.144023	0.199053	0.696015	0.0830413	0.0120019	rs9370260
Alanine Aminotransferase	chr6:54124865:54169528:clu_24136:ENSG00000146147.14	Liver	6:53957588:CS1	0.996496	0.144023	0.111986	0.414995	0.0830413	0.0120019	rs9370260
Alanine Aminotransferase	chr6:54189914:54202105:clu_24138:ENSG00000146147.14	Liver	6:53957588:CS1	0.996496	0.144023	0.194749	0.649318	0.0830413	0.0120019	rs9370260
Alanine Aminotransferase	chr6:54202233:54210105:clu_24139:ENSG00000146147.14	Liver	6:53957588:CS1	0.996496	0.144023	0.156512	0.576261	0.0830413	0.0120019	rs9370260
Alanine Aminotransferase	chr6:54210231:54257308:clu_24139:ENSG00000146147.14	Liver	6:53957588:CS1	0.996496	0.144023	0.117265	0.403886	0.0830413	0.0120019	rs9370260
Alanine Aminotransferase	chr6:54257361:54261635:clu_24140:ENSG00000146147.14	Liver	6:53957588:CS1	0.996496	0.144023	0.121911	0.396662	0.0830413	0.0120019	rs9370260
Alanine Aminotransferase	chr6:97273062:97278849:clu_35400:ENSG00000146263.11	Adipose_Visceral	6:98565211:CS1	0.984495	0.373813	-2.02859	2.19264	0.481295	0.182489	rs7773879~rs1487445
Alanine Aminotransferase	chr6:97278898:97281237:clu_35400:ENSG00000146263.11	Adipose_Visceral	6:98565211:CS1	0.984495	0.373813	-29.2864	30.0267	0.5032	0.191323	rs1487445
Alanine Aminotransferase	FRK	Colon_Transverse	6:116338065:CS1	0.995711	0.270099	2.24952	1.17224	0.79052	0.216185	rs12201275~rs1890426
Alanine Aminotransferase	NT5DC1	Fibroblasts	6:116338065:CS1	0.995711	0.270099	0.342635	0.664997	0.20519	0.0539142	rs1890426
Alanine Aminotransferase	CENPW	Artery_Tibial	6:127454893:CS1	0.999936	0.259594	2.01486	2.92844	0.333312	0.0865313	rs6916318
Alanine Aminotransferase	RNF146	Spleen	6:127454893:CS1	0.999936	0.259594	-0.889938	1.25261	0.333312	0.0865313	rs6916318
Alanine Aminotransferase	RSPO3	Artery_Tibial	6:127454893:CS1	0.999936	0.259594	1.87411	2.65878	0.333312	0.0865313	rs6916318
Alanine Aminotransferase	L3MBTL3	Adipose_Subcutaneous	6:130370404:CS1	0.950426	0.139576	-0.00411325	0.0647171	0.00620567	0.000756904	rs75231773~rs13208867~rs9483082~rs12199027
Alanine Aminotransferase	L3MBTL3	Esophagus_Junction	6:130370404:CS1	0.950426	0.139576	-0.303891	0.69386	0.176707	0.0267506	rs9388762~rs9483082
Alanine Aminotransferase	L3MBTL3	Esophagus_Muscularis	6:130370404:CS1	0.950426	0.139576	-0.0225575	0.146562	0.0192188	0.00252165	rs9388762~rs4895864
Alanine Aminotransferase	L3MBTL3	Liver	6:130370404:CS1	0.950426	0.139576	-0.0884515	0.370258	0.0508589	0.00712828	rs9388762~rs9483082
Alanine Aminotransferase	L3MBTL3	Lung	6:130370404:CS1	0.950426	0.139576	-0.106473	0.256273	0.153372	0.0227639	rs9388762~rs4895864~rs9483082
Alanine Aminotransferase	L3MBTL3	Pancreas	6:130370404:CS1	0.950426	0.139576	-0.208664	0.464362	0.174007	0.0263063	rs9388762~rs9483082
Alanine Aminotransferase	L3MBTL3	Pituitary	6:130370404:CS1	0.950426	0.139576	-0.159674	0.415028	0.132746	0.0193556	rs9388762~rs4895864~rs9483082
[truncated: 237,206+ more rows]

## Sheet: Table S4
Table S4. Causal gene-tissue pairs identified by TGFM. (TGFM uses the empirical PIPs obtained in resampling procedures, and hence CS.PIP (the sum of individual PIPs in a credible set) can be slightly larger than 1.)
Trait	Gene	Tissue	Credible Set	CS.PIP	CS.Pratt	Estimate	SE	PIP	Pratt	xQTL
Abdominal Aortic Aneurysm	NMNAT1	Adipose_Visceral	1:9438175:CS2	1.02076	0.0757984	0.245904	0.335745	0.147977	0.00545355	rs2268175~rs9442580
Abdominal Aortic Aneurysm	chr1:9235066:9244925:clu_45084:ENSG00000049239.12	Artery_Aorta	1:9438175:CS2	1.02076	0.0757984	-0.815147	0.105154	0.783219	0.0640936	rs9659342~rs56119172~rs75737595~rs9442580~rs78051618
Abdominal Aortic Aneurysm	SPSB1	Nerve_Tibial	1:9438175:CS3	0.98742	0.0254363	0.843315	0.114015	0.762716	0.0202866	rs114709597~rs2072735
Abdominal Aortic Aneurysm	CELSR2	Liver	1:109817590:CS1	1.17723	0.242369	-0.213648	0.0191037	0.119707	0.0227039	rs7528419
Abdominal Aortic Aneurysm	CELSR2	Pancreas	1:109817590:CS1	1.17723	0.242369	-0.265297	0.0237221	0.119707	0.0227039	rs7528419
Abdominal Aortic Aneurysm	PSRC1	Brain_Cortex	1:109817590:CS1	1.17723	0.242369	-0.308992	0.0276291	0.119707	0.0227039	rs7528419
Abdominal Aortic Aneurysm	PSRC1	Esophagus_Mucosa	1:109817590:CS1	1.17723	0.242369	-0.174659	0.0156175	0.119707	0.0227039	rs7528419
Abdominal Aortic Aneurysm	PSRC1	Fibroblasts	1:109817590:CS1	1.17723	0.242369	-0.280211	0.0250556	0.119707	0.0227039	rs7528419
Abdominal Aortic Aneurysm	PSRC1	Heart_Left_Ventricle	1:109817590:CS1	1.17723	0.242369	-0.189459	0.117253	0.0705191	0.0124444	rs7528419~rs68104325
Abdominal Aortic Aneurysm	PSRC1	Kidney_Tube	1:109817590:CS1	1.17723	0.242369	-0.283816	0.128715	0.0844308	0.0381111	rs7528419~rs657420~rs688498~rs2282292~rs7515901
Abdominal Aortic Aneurysm	PSRC1	Liver	1:109817590:CS1	1.17723	0.242369	-0.207811	0.0185818	0.119707	0.0227039	rs7528419
Abdominal Aortic Aneurysm	PSRC1	Nerve_Tibial	1:109817590:CS1	1.17723	0.242369	-0.134959	0.105953	0.0646234	0.0101823	rs7528419~rs68104325
Abdominal Aortic Aneurysm	PSRC1	Whole_Blood	1:109817590:CS1	1.17723	0.242369	-0.202972	0.0181491	0.119707	0.0227039	rs7528419
Abdominal Aortic Aneurysm	SORT1	Liver	1:109817590:CS1	1.17723	0.242369	-0.199941	0.0178781	0.119707	0.0227039	rs7528419
Abdominal Aortic Aneurysm	IL6R	Artery_Tibial	1:154425456:CS1	0.908514	0.156569	0.209605	0.0272578	0.110649	0.0190667	rs61812598
Abdominal Aortic Aneurysm	chr1:153990802:153990914:clu_42933:ENSG00000177954.11	Whole_Blood	1:154425456:CS1	0.908514	0.156569	-0.619531	0.080566	0.110649	0.0190667	rs61812598
Abdominal Aortic Aneurysm	chr1:154449980:154465134:clu_42965:ENSG00000160712.12	Whole_Blood	1:154425456:CS1	0.908514	0.156569	-0.183421	0.0238528	0.110649	0.0190667	rs61812598
Abdominal Aortic Aneurysm	chr1:154449980:154465134:clu_48468:ENSG00000160712.12	Muscle_Skeletal	1:154425456:CS1	0.908514	0.156569	-0.229056	0.0297873	0.110649	0.0190667	rs61812598
Abdominal Aortic Aneurysm	chr1:154449980:154465134:clu_58019:ENSG00000160712.12	Lung	1:154425456:CS1	0.908514	0.156569	-0.248056	0.032258	0.110649	0.0190667	rs61812598
Abdominal Aortic Aneurysm	chr1:154454581:154465134:clu_58019:ENSG00000160712.12	Lung	1:154425456:CS1	0.908514	0.156569	0.449642	0.058473	0.110649	0.0190667	rs61812598
Abdominal Aortic Aneurysm	chr1:154470362:154485943:clu_58473:ENSG00000169291.9	Thyroid	1:154425456:CS1	0.908514	0.156569	-0.678798	0.0882732	0.110649	0.0190667	rs61812598
Abdominal Aortic Aneurysm	chr1:172394410:172397164:clu_56997:ENSG00000135845.9	Nerve_Tibial	1:172333448:CS1	1.02455	0.130508	-1.08603	0.085149	0.49331	0.0661367	rs2227200
Abdominal Aortic Aneurysm	chr1:172394410:172399819:clu_44686:ENSG00000135845.9	Fibroblasts	1:172333448:CS1	1.02455	0.130508	-0.0965025	0.144773	0.0964696	0.00617051	rs2227200~1:172361566_GTATT_G~rs114203938
Abdominal Aortic Aneurysm	SMYD2	Brain_Cerebellum	1:214405605:CS1	1.002	0.361615	-1.11218	0.300456	0.440544	0.168397	rs6670341~rs1660364
Abdominal Aortic Aneurysm	GPATCH2	Colon_Transverse	1:218615451:CS1	1.00001	0.259317	-1.12227	0.00113861	0.355734	0.0922472	rs991967
Abdominal Aortic Aneurysm	TGFB2	Kidney_Glom	1:218615451:CS1	1.00001	0.259317	-0.814715	0.000826575	0.355734	0.0922472	rs991967
Abdominal Aortic Aneurysm	LDAH	Muscle_Skeletal	2:20878105:CS1	0.968785	0.227066	-0.903892	0.772099	0.412526	0.0863237	rs9306894~rs13394027~rs340596
Abdominal Aortic Aneurysm	EPAS1	Artery_Aorta	2:46758015:CS0	0.597174	0.0128707	0.48082	0.0176499	0.597174	0.0128707	rs6724315
Abdominal Aortic Aneurysm	chr2:47024359:47029224:clu_37161:ENSG00000068724.15	Whole_Blood	2:46758015:CS1	0.971747	0.0708153	-2.50646	0.0542328	0.971747	0.0708153	rs12623288~rs72800535
Abdominal Aortic Aneurysm	chr2:68545312:68567341:clu_46260:ENSG00000169621.9	Adipose_Visceral	2:69381569:CS1	1.03163	0.131977	0.145446	0.000974889	0.0989596	0.00513275	rs34081493
Abdominal Aortic Aneurysm	ENSG00000235319	Pituitary	2:105911258:CS1	1.07121	0.106075	-0.493558	0.404628	0.320449	0.0274422	rs2576748~rs3749068~rs2278502~rs880427
Abdominal Aortic Aneurysm	ENSG00000272994	Brain_Cerebellum	2:105911258:CS1	1.07121	0.106075	-0.726397	0.196798	0.616972	0.0651447	rs2576748
Abdominal Aortic Aneurysm	ENSG00000259863	Artery_Aorta	2:109806197:CS1	2.0626	0.0962837	0.0323292	0.0124064	0.196928	0.00425407	rs72836527~rs72836575~rs4676260
Abdominal Aortic Aneurysm	ENSG00000259863	Artery_Coronary	2:109806197:CS1	2.0626	0.0962837	0.225256	0.0245775	0.276574	0.0153164	rs11676676~rs4676260
Abdominal Aortic Aneurysm	ENSG00000259863	Artery_Tibial	2:109806197:CS1	2.0626	0.0962837	0.0944535	0.0340172	0.232873	0.00820588	rs11676676~rs4676260
Abdominal Aortic Aneurysm	ENSG00000259863	Muscle_Skeletal	2:109806197:CS1	2.0626	0.0962837	0.154204	0.00624276	0.271244	0.0137015	rs4676260
Abdominal Aortic Aneurysm	SH3RF3	Artery_Aorta	2:109806197:CS1	2.0626	0.0962837	0.105268	0.00426165	0.271244	0.0137015	rs4676260
Abdominal Aortic Aneurysm	SH3RF3	Artery_Coronary	2:109806197:CS1	2.0626	0.0962837	0.175411	0.00710129	0.271244	0.0137015	rs4676260
Abdominal Aortic Aneurysm	SH3RF3	Artery_Tibial	2:109806197:CS1	2.0626	0.0962837	0.126243	0.00511079	0.271244	0.0137015	rs4676260
Abdominal Aortic Aneurysm	SH3RF3	Muscle_Skeletal	2:109806197:CS1	2.0626	0.0962837	0.153249	0.00620409	0.271244	0.0137015	rs4676260
Abdominal Aortic Aneurysm	IL1RN	Colon_Transverse	2:113841030:CS2	1.08664	0.041846	0.542015	0.36406	0.240617	0.00755856	rs4848311~rs4849150~rs11123160~rs12711752~rs1867830
Abdominal Aortic Aneurysm	IL36A	Esophagus_Mucosa	2:113841030:CS2	1.08664	0.041846	0.28129	0.0854859	0.334797	0.016495	rs4849150~rs12711752
Abdominal Aortic Aneurysm	IL36G	Kidney_Glom	2:113841030:CS2	1.08664	0.041846	0.0564882	0.0197169	0.103584	0.00274439	rs11123160~rs12711752
Abdominal Aortic Aneurysm	IL36RN	Esophagus_Mucosa	2:113841030:CS2	1.08664	0.041846	0.145995	0.0312431	0.257896	0.0105815	rs4849150
Abdominal Aortic Aneurysm	IL36RN	Kidney_Glom	2:113841030:CS2	1.08664	0.041846	0.162461	0.0903189	0.092665	0.00217999	rs11123160~rs12711752
Abdominal Aortic Aneurysm	ENSG00000261379	Adipose_Subcutaneous	2:227105752:CS1	0.991222	0.147274	-0.219216	0.00491471	0.218163	0.0324188	rs2176040
Abdominal Aortic Aneurysm	ENSG00000272622	Adipose_Subcutaneous	2:227105752:CS1	0.991222	0.147274	-0.196267	0.0044002	0.218163	0.0324188	rs2176040
Abdominal Aortic Aneurysm	IRS1	Adipose_Subcutaneous	2:227105752:CS1	0.991222	0.147274	-0.147393	0.00330446	0.218163	0.0324188	rs2176040
Abdominal Aortic Aneurysm	IRS1	Adipose_Visceral	2:227105752:CS1	0.991222	0.147274	-0.208937	0.00468425	0.218163	0.0324188	rs2176040
Abdominal Aortic Aneurysm	COL4A4	Adipose_Visceral	2:227105752:CS2	1.04779	0.0929549	-0.0203939	0.00114341	0.023176	0.00183997	rs2177593
Abdominal Aortic Aneurysm	LOC124900533	Kidney_Glom	2:227105752:CS2	1.04779	0.0929549	0.234636	0.0649612	0.119451	0.0140534	rs2177593~rs12475134~rs13411764
Abdominal Aortic Aneurysm	RHBDD1	Artery_Aorta	2:227105752:CS2	1.04779	0.0929549	0.027244	0.00588886	0.0306023	0.00257258	rs2177593~rs13411764
Abdominal Aortic Aneurysm	RHBDD1	Artery_Tibial	2:227105752:CS2	1.04779	0.0929549	0.0147878	0.000829098	0.023176	0.00183997	rs2177593
Abdominal Aortic Aneurysm	RHBDD1	Esophagus_Muscularis	2:227105752:CS2	1.04779	0.0929549	0.0231123	0.00430942	0.0274231	0.00225329	rs2177593~rs13411764
Abdominal Aortic Aneurysm	chr2:226970631:226980117:clu_44270:ENSG00000081052.11	Artery_Aorta	2:227105752:CS2	1.04779	0.0929549	0.011643	0.000652784	0.023176	0.00183997	rs2177593
Abdominal Aortic Aneurysm	chr2:226970631:226980117:clu_53376:ENSG00000081052.11	Lung	2:227105752:CS2	1.04779	0.0929549	0.0287123	0.0016098	0.023176	0.00183997	rs2177593
Abdominal Aortic Aneurysm	chr2:226980183:226980319:clu_39132:ENSG00000081052.11	Heart_Left_Ventricle	2:227105752:CS2	1.04779	0.0929549	-0.0428633	0.00819551	0.0326135	0.00296729	rs4675096~rs2177593~rs75193400
Abdominal Aortic Aneurysm	chr2:226980183:226980319:clu_43897:ENSG00000081052.11	Heart_Atrial_Appendage	2:227105752:CS2	1.04779	0.0929549	-0.0723672	0.0245555	0.0394157	0.00365413	rs2177593~rs12475134~rs4592846
Abdominal Aortic Aneurysm	chr2:226980183:226980319:clu_44270:ENSG00000081052.11	Artery_Aorta	2:227105752:CS2	1.04779	0.0929549	-0.0147563	0.000827332	0.023176	0.00183997	rs2177593
Abdominal Aortic Aneurysm	chr2:226980183:226980319:clu_53714:ENSG00000081052.11	Thyroid	2:227105752:CS2	1.04779	0.0929549	-0.0134036	0.000751494	0.023176	0.00183997	rs2177593
Abdominal Aortic Aneurysm	chr2:226980183:226982200:clu_44270:ENSG00000081052.11	Artery_Aorta	2:227105752:CS2	1.04779	0.0929549	-0.00973348	0.000545722	0.023176	0.00183997	rs2177593
Abdominal Aortic Aneurysm	chr2:226980183:226982200:clu_53714:ENSG00000081052.11	Thyroid	2:227105752:CS2	1.04779	0.0929549	-0.0423069	0.00747701	0.0861594	0.00903575	rs17268434~2:227771300_CAT_C~rs2177593~rs75193400~rs77798290~rs55917923
Abdominal Aortic Aneurysm	chr2:226980183:226982223:clu_44270:ENSG00000081052.11	Artery_Aorta	2:227105752:CS2	1.04779	0.0929549	0.059979	0.0230259	0.0465464	0.00436603	rs13015698~rs2177593~rs12475134
Abdominal Aortic Aneurysm	chr2:226980183:227008018:clu_53714:ENSG00000081052.11	Thyroid	2:227105752:CS2	1.04779	0.0929549	0.0094204	0.000528168	0.023176	0.00183997	rs2177593
Abdominal Aortic Aneurysm	chr2:226980183:227022048:clu_38917:ENSG00000081052.11	Adrenal_Gland	2:227105752:CS2	1.04779	0.0929549	0.0250387	0.00508679	0.0279188	0.00229701	rs2177593~rs13411764
Abdominal Aortic Aneurysm	chr2:226980183:227022048:clu_39132:ENSG00000081052.11	Heart_Left_Ventricle	2:227105752:CS2	1.04779	0.0929549	0.0128904	0.000722718	0.023176	0.00183997	rs2177593
Abdominal Aortic Aneurysm	chr2:226980183:227022048:clu_43897:ENSG00000081052.11	Heart_Atrial_Appendage	2:227105752:CS2	1.04779	0.0929549	0.00988859	0.000554418	0.023176	0.00183997	rs2177593
Abdominal Aortic Aneurysm	chr2:226980183:227022048:clu_44270:ENSG00000081052.11	Artery_Aorta	2:227105752:CS2	1.04779	0.0929549	0.00841024	0.000471532	0.023176	0.00183997	rs2177593
Abdominal Aortic Aneurysm	chr2:226980183:227022048:clu_45740:ENSG00000081052.11	Esophagus_Muscularis	2:227105752:CS2	1.04779	0.0929549	0.0119097	0.000667734	0.023176	0.00183997	rs2177593
Abdominal Aortic Aneurysm	chr2:226980183:227022048:clu_53376:ENSG00000081052.11	Lung	2:227105752:CS2	1.04779	0.0929549	0.010133	0.000568122	0.023176	0.00183997	rs2177593
Abdominal Aortic Aneurysm	chr2:226980183:227022048:clu_53714:ENSG00000081052.11	Thyroid	2:227105752:CS2	1.04779	0.0929549	0.00788456	0.000442059	0.023176	0.00183997	rs2177593
Abdominal Aortic Aneurysm	chr2:226980405:226982200:clu_44270:ENSG00000081052.11	Artery_Aorta	2:227105752:CS2	1.04779	0.0929549	-0.0105943	0.000593987	0.023176	0.00183997	rs2177593
Abdominal Aortic Aneurysm	chr2:226980405:226982200:clu_53714:ENSG00000081052.11	Thyroid	2:227105752:CS2	1.04779	0.0929549	-0.0079304	0.000444629	0.023176	0.00183997	rs2177593
Abdominal Aortic Aneurysm	chr2:226980405:226982223:clu_53714:ENSG00000081052.11	Thyroid	2:227105752:CS2	1.04779	0.0929549	0.00959557	0.00583908	0.016071	0.00100599	rs2177593~rs12475134~rs4592846
Abdominal Aortic Aneurysm	chr2:226982270:227008018:clu_38917:ENSG00000081052.11	Adrenal_Gland	2:227105752:CS2	1.04779	0.0929549	-0.0551413	0.0140046	0.0431029	0.0043276	rs28695886~rs2177593~rs13411764
Abdominal Aortic Aneurysm	chr2:226982270:227008018:clu_44270:ENSG00000081052.11	Artery_Aorta	2:227105752:CS2	1.04779	0.0929549	-0.0113348	0.000635504	0.023176	0.00183997	rs2177593
Abdominal Aortic Aneurysm	chr2:226982270:227008018:clu_53376:ENSG00000081052.11	Lung	2:227105752:CS2	1.04779	0.0929549	-0.016273	0.000912368	0.023176	0.00183997	rs2177593
Abdominal Aortic Aneurysm	chr2:226982270:227008018:clu_53714:ENSG00000081052.11	Thyroid	2:227105752:CS2	1.04779	0.0929549	-0.00830008	0.000465356	0.023176	0.00183997	rs2177593
Abdominal Aortic Aneurysm	chr2:226982270:227022048:clu_44270:ENSG00000081052.11	Artery_Aorta	2:227105752:CS2	1.04779	0.0929549	-0.0469218	0.0293747	0.0236421	0.00186832	rs13015698~rs2177593~rs12475134~rs112159856
Abdominal Aortic Aneurysm	chr2:227007588:227008018:clu_53714:ENSG00000081052.11	Thyroid	2:227105752:CS2	1.04779	0.0929549	0.014628	0.000820142	0.023176	0.00183997	rs2177593
Abdominal Aortic Aneurysm	chr2:227010501:227012181:clu_44270:ENSG00000081052.11	Artery_Aorta	2:227105752:CS2	1.04779	0.0929549	-0.0412471	0.0133161	0.0414398	0.00368427	rs2177593~rs12475134~rs4592846
Abdominal Aortic Aneurysm	chr2:227010501:227012181:clu_53376:ENSG00000081052.11	Lung	2:227105752:CS2	1.04779	0.0929549	-0.0380184	0.00404834	0.026704	0.00222976	rs2177593~rs4592846
Abdominal Aortic Aneurysm	chr2:227010501:227012181:clu_53714:ENSG00000081052.11	Thyroid	2:227105752:CS2	1.04779	0.0929549	-0.0282263	0.00158255	0.023176	0.00183997	rs2177593
Abdominal Aortic Aneurysm	ZBTB38	Adipose_Subcutaneous	3:141105570:CS1	0.967189	0.117258	-0.0362908	0.00128495	0.0325738	0.00393321	rs724016
Abdominal Aortic Aneurysm	ZBTB38	Adipose_Visceral	3:141105570:CS1	0.967189	0.117258	-0.0521891	0.0149436	0.0241031	0.00276782	rs13095453~rs724016
Abdominal Aortic Aneurysm	ZBTB38	Artery_Tibial	3:141105570:CS1	0.967189	0.117258	-0.0472482	0.00167292	0.0325738	0.00393321	rs724016
Abdominal Aortic Aneurysm	ZBTB38	Esophagus_Junction	3:141105570:CS1	0.967189	0.117258	-0.0555702	0.00196757	0.0325738	0.00393321	rs724016
Abdominal Aortic Aneurysm	ZBTB38	Heart_Atrial_Appendage	3:141105570:CS1	0.967189	0.117258	-0.0870847	0.00308341	0.0325738	0.00393321	rs724016
Abdominal Aortic Aneurysm	ZBTB38	Muscle_Skeletal	3:141105570:CS1	0.967189	0.117258	-0.0416861	0.0100396	0.0253248	0.00305507	rs13088239~rs724016
Abdominal Aortic Aneurysm	ZBTB38	Nerve_Tibial	3:141105570:CS1	0.967189	0.117258	-0.054519	0.00193035	0.0325738	0.00393321	rs724016
Abdominal Aortic Aneurysm	ZBTB38	Thyroid	3:141105570:CS1	0.967189	0.117258	-0.0345329	0.0012227	0.0325738	0.00393321	rs724016
Abdominal Aortic Aneurysm	ZBTB38	Whole_Blood	3:141105570:CS1	0.967189	0.117258	-0.0248523	0.00857714	0.0270264	0.00327918	rs9845717~rs724016~rs149720422~rs75460088~rs142473806
Abdominal Aortic Aneurysm	chr3:141386937:141396259:clu_36557:ENSG00000177311.11	Fibroblasts	3:141105570:CS1	0.967189	0.117258	0.0734107	0.0177386	0.0854556	0.0108621	rs724016~rs113370166~rs557769532
Abdominal Aortic Aneurysm	chr3:141386937:141396259:clu_39976:ENSG00000177311.11	Artery_Aorta	3:141105570:CS1	0.967189	0.117258	0.0428938	0.00151874	0.0325738	0.00393321	rs724016
Abdominal Aortic Aneurysm	chr3:141386937:141396259:clu_40171:ENSG00000177311.11	Muscle_Skeletal	3:141105570:CS1	0.967189	0.117258	0.0425173	0.00150541	0.0325738	0.00393321	rs724016
Abdominal Aortic Aneurysm	chr3:141386937:141396259:clu_41890:ENSG00000177311.11	Artery_Tibial	3:141105570:CS1	0.967189	0.117258	0.026784	0.00094834	0.0325738	0.00393321	rs724016
Abdominal Aortic Aneurysm	chr3:141386937:141396259:clu_43160:ENSG00000177311.11	Colon_Transverse	3:141105570:CS1	0.967189	0.117258	0.0633613	0.00224343	0.0325738	0.00393321	rs724016
Abdominal Aortic Aneurysm	chr3:141386937:141396259:clu_45318:ENSG00000177311.11	Adipose_Subcutaneous	3:141105570:CS1	0.967189	0.117258	0.0370285	0.00131107	0.0325738	0.00393321	rs724016
Abdominal Aortic Aneurysm	chr3:141386937:141396259:clu_48090:ENSG00000177311.11	Lung	3:141105570:CS1	0.967189	0.117258	0.0383766	0.0013588	0.0325738	0.00393321	rs724016
Abdominal Aortic Aneurysm	chr3:141386937:141403927:clu_36557:ENSG00000177311.11	Fibroblasts	3:141105570:CS1	0.967189	0.117258	-0.0331568	0.00117398	0.0325738	0.00393321	rs724016
Abdominal Aortic Aneurysm	chr3:141386937:141403927:clu_40171:ENSG00000177311.11	Muscle_Skeletal	3:141105570:CS1	0.967189	0.117258	-0.0469799	0.00166342	0.0325738	0.00393321	rs724016
Abdominal Aortic Aneurysm	chr3:141386937:141403927:clu_41890:ENSG00000177311.11	Artery_Tibial	3:141105570:CS1	0.967189	0.117258	-0.0282861	0.0112332	0.017369	0.00195098	rs13088239~rs724016
Abdominal Aortic Aneurysm	chr3:141386937:141403927:clu_48090:ENSG00000177311.11	Lung	3:141105570:CS1	0.967189	0.117258	-0.092709	0.00328254	0.0325738	0.00393321	rs724016
Abdominal Aortic Aneurysm	chr3:141396503:141403927:clu_36557:ENSG00000177311.11	Fibroblasts	3:141105570:CS1	0.967189	0.117258	0.0265572	0.000940309	0.0325738	0.00393321	rs724016
Abdominal Aortic Aneurysm	chr3:141396503:141403927:clu_39976:ENSG00000177311.11	Artery_Aorta	3:141105570:CS1	0.967189	0.117258	0.0373305	0.00132176	0.0325738	0.00393321	rs724016
Abdominal Aortic Aneurysm	chr3:141396503:141403927:clu_40171:ENSG00000177311.11	Muscle_Skeletal	3:141105570:CS1	0.967189	0.117258	0.0342355	0.00121218	0.0325738	0.00393321	rs724016
Abdominal Aortic Aneurysm	chr3:141396503:141403927:clu_41890:ENSG00000177311.11	Artery_Tibial	3:141105570:CS1	0.967189	0.117258	0.0309704	0.00109657	0.0325738	0.00393321	rs724016
Abdominal Aortic Aneurysm	chr3:141396503:141403927:clu_46644:ENSG00000177311.11	Nerve_Tibial	3:141105570:CS1	0.967189	0.117258	0.0433791	0.00153592	0.0325738	0.00393321	rs724016
Abdominal Aortic Aneurysm	chr3:141396503:141403927:clu_48090:ENSG00000177311.11	Lung	3:141105570:CS1	0.967189	0.117258	0.0207661	0.00912094	0.019402	0.0021069	rs13095453~rs724016
Abdominal Aortic Aneurysm	chr3:141396503:141403927:clu_48433:ENSG00000177311.11	Thyroid	3:141105570:CS1	0.967189	0.117258	0.0388691	0.00137624	0.0325738	0.00393321	rs724016
Abdominal Aortic Aneurysm	chr3:141402449:141403927:clu_39976:ENSG00000177311.11	Artery_Aorta	3:141105570:CS1	0.967189	0.117258	-0.0697961	0.00659994	0.0316423	0.00401943	rs724016~rs2114867
Abdominal Aortic Aneurysm	chr3:141402449:141403927:clu_48090:ENSG00000177311.11	Lung	3:141105570:CS1	0.967189	0.117258	-0.0326261	0.0077326	0.023908	0.00278299	rs13095453~rs724016
Abdominal Aortic Aneurysm	chr3:142198933:142204695:clu_34399:ENSG00000175066.15	Pancreas	3:141105570:CS1	0.967189	0.117258	-0.120179	0.0232947	0.0289082	0.0038366	rs724016~rs2114867
Abdominal Aortic Aneurysm	MECOM	Thyroid	3:169477506:CS0	0.756314	0.0437507	-0.625957	0.00280745	0.756314	0.0437507	rs16852912
Abdominal Aortic Aneurysm	chr3:170136665:170145423:clu_35876:ENSG00000173889.15	Whole_Blood	3:169477506:CS1	0.94936	0.13286	-2.6999	0.254904	0.80423	0.119551	rs13061853~rs16854335~rs12486767
Abdominal Aortic Aneurysm	LDB2	Esophagus_Muscularis	4:16885455:CS1	1.16496	0.102582	1.53848	0.342412	0.561494	0.0676962	rs10939692
Abdominal Aortic Aneurysm	LDB2	Pancreas	4:16885455:CS1	1.16496	0.102582	0.0706422	0.0439257	0.167598	0.00750268	rs10939692~rs115490140
Abdominal Aortic Aneurysm	LDB2	Spleen	4:16885455:CS1	1.16496	0.102582	0.547143	0.67532	0.332279	0.0155855	rs10939692~rs9998599
Abdominal Aortic Aneurysm	chr4:53508227:53573623:clu_43939:ENSG00000072201.13	Thyroid	4:54590469:CS0	0.524929	0.0300259	-1.63613	0.537654	0.524929	0.0300259	rs10517279~rs6834288~rs716251~rs2859819
Abdominal Aortic Aneurysm	SPP1	Adipose_Subcutaneous	4:88775160:CS1	1.09856	0.112213	-0.420407	0.0404013	0.36982	0.0385679	rs9998898
Abdominal Aortic Aneurysm	SPP1	Artery_Tibial	4:88775160:CS1	1.09856	0.112213	-0.396657	0.0381189	0.36982	0.0385679	rs9998898
Abdominal Aortic Aneurysm	SPP1	Heart_Left_Ventricle	4:88775160:CS1	1.09856	0.112213	-0.558459	0.147538	0.288665	0.0281135	rs9998898~rs6532024
Abdominal Aortic Aneurysm	chr4:99300370:99300951:clu_41692:ENSG00000246090.6	Adipose_Subcutaneous	4:100284685:CS1	0.978644	0.103287	-1.04734	0.0110544	0.978644	0.103287	rs34798061~rs34394283~rs1693435
Abdominal Aortic Aneurysm	NFKB1	Fibroblasts	4:103411099:CS1	0.963202	0.150876	0.265068	0.0164377	0.217779	0.0341053	rs2125213
Abdominal Aortic Aneurysm	NFKB1	Kidney_Glom	4:103411099:CS1	0.963202	0.150876	0.151147	0.0451838	0.137108	0.0205478	rs2125213~rs62327181
Abdominal Aortic Aneurysm	NFKB1	Whole_Blood	4:103411099:CS1	0.963202	0.150876	0.265571	0.0164689	0.217779	0.0341053	rs2125213
Abdominal Aortic Aneurysm	chr4:102501788:102525512:clu_33545:ENSG00000109320.11	Fibroblasts	4:103411099:CS1	0.963202	0.150876	-0.231494	0.0143557	0.217779	0.0341053	rs2125213
Abdominal Aortic Aneurysm	chr4:103082929:103086480:clu_42845:ENSG00000164038.14	Nerve_Tibial	4:103411099:CS1	0.963202	0.150876	-0.759398	0.149121	0.172758	0.0280128	rs2125213~rs17033015
Abdominal Aortic Aneurysm	ZNF827	Adipose_Visceral	4:146809016:CS1	1.02676	0.1416	1.26571	1.17963	0.450668	0.0494145	rs201002683~rs7662069~rs34575293
Abdominal Aortic Aneurysm	chr5:865581:868607:clu_29933:ENSG00000028310.17	Whole_Blood	5:1286516:CS1	1.0222	0.0405092	1.31979	0.000449714	0.78667	0.0315299	rs2736100
Abdominal Aortic Aneurysm	chr5:52788414:52799889:clu_40354:ENSG00000152684.10	Lung	5:52723007:CS1	0.99462	0.0932058	0.490113	0.00256217	0.425402	0.039888	rs11747359
Abdominal Aortic Aneurysm	chr5:52788414:52799889:clu_40354:ENSG00000213949.8	Lung	5:52723007:CS1	0.99462	0.0932058	0.49031	0.0025632	0.425402	0.039888	rs11747359
Abdominal Aortic Aneurysm	ESM1	Islets	5:52723007:CS2	0.996453	0.0564896	1.18921	0.0517974	0.435828	0.0257571	rs13154883~rs7706939
Abdominal Aortic Aneurysm	chr5:54519573:54543179:clu_33252:ENSG00000178996.13	Stomach	5:52723007:CS2	0.996453	0.0564896	-1.09367	0.0355418	0.418976	0.0229916	rs13154883
Abdominal Aortic Aneurysm	ANKDD1B	Kidney_Glom	5:74651084:CS1	1.01062	0.0912368	0.117182	0.0100406	0.0892686	0.00924649	rs3843482~rs34358
Abdominal Aortic Aneurysm	CERT1	Esophagus_Mucosa	5:74651084:CS1	1.01062	0.0912368	-0.0941091	0.0186905	0.0951595	0.00850347	rs1115091~rs3843482
Abdominal Aortic Aneurysm	ENSG00000271815	Colon_Transverse	5:74651084:CS1	1.01062	0.0912368	-0.353682	0.193107	0.0728087	0.00886012	rs7736223~rs4703645~rs3843482~rs12173076
Abdominal Aortic Aneurysm	HMGCR	Muscle_Skeletal	5:74651084:CS1	1.01062	0.0912368	0.0866914	0.00712522	0.0748723	0.00644846	rs3843482
Abdominal Aortic Aneurysm	POLK	Adipose_Subcutaneous	5:74651084:CS1	1.01062	0.0912368	0.178295	0.0146542	0.0748723	0.00644846	rs3843482
Abdominal Aortic Aneurysm	POLK	Brain_Cerebellum	5:74651084:CS1	1.01062	0.0912368	0.0507332	0.0464005	0.0281264	0.00183186	rs556775315~rs3843482~rs779550517~rs34358
Abdominal Aortic Aneurysm	POLK	Kidney_Tube	5:74651084:CS1	1.01062	0.0912368	-0.0591099	0.0353153	0.0397769	0.00302566	rs3843482~rs73763100~rs34358
Abdominal Aortic Aneurysm	POLK	Lung	5:74651084:CS1	1.01062	0.0912368	0.237123	0.0316206	0.110104	0.0128639	rs4703645~rs3843482~rs12173076
Abdominal Aortic Aneurysm	chr5:75354697:75355056:clu_33542:ENSG00000113161.15	Heart_Atrial_Appendage	5:74651084:CS1	1.01062	0.0912368	0.149003	0.10456	0.0860954	0.00606576	rs1115091~rs3761739~rs3843482
Abdominal Aortic Aneurysm	chr5:75354697:75355056:clu_35283:ENSG00000113161.15	Esophagus_Mucosa	5:74651084:CS1	1.01062	0.0912368	0.0657747	0.101042	0.0471147	0.00215474	rs1115091~rs3843482
Abdominal Aortic Aneurysm	chr5:75354697:75355365:clu_31006:ENSG00000113161.15	Fibroblasts	5:74651084:CS1	1.01062	0.0912368	-0.132506	0.0288118	0.108257	0.00993223	rs1115091~rs3843482
Abdominal Aortic Aneurysm	chr5:75354697:75355365:clu_34063:ENSG00000113161.15	Muscle_Skeletal	5:74651084:CS1	1.01062	0.0912368	-0.111767	0.00918618	0.0748723	0.00644846	rs3843482
Abdominal Aortic Aneurysm	chr5:75354697:75355365:clu_35283:ENSG00000113161.15	Esophagus_Mucosa	5:74651084:CS1	1.01062	0.0912368	-0.073063	0.00600509	0.0748723	0.00644846	rs3843482
Abdominal Aortic Aneurysm	chr5:77463226:77489457:clu_39646:ENSG00000164253.13	Nerve_Tibial	5:77881710:CS1	1.11113	0.112324	0.325267	0.0793132	0.1889	0.0181986	rs4704514~rs10076149
Abdominal Aortic Aneurysm	chr5:78510398:78564813:clu_29437:ENSG00000145685.13	Pancreas	5:77881710:CS1	1.11113	0.112324	-0.460939	0.0602387	0.29175	0.0346098	rs10076149~rs10037983
Abdominal Aortic Aneurysm	chr5:78510398:78564813:clu_36632:ENSG00000145685.13	Pituitary	5:77881710:CS1	1.11113	0.112324	-0.117421	0.143996	0.0993757	0.00584733	rs355416~rs10076149~rs10037983
Abdominal Aortic Aneurysm	chr5:78550906:78564813:clu_31050:ENSG00000145685.13	Fibroblasts	5:77881710:CS1	1.11113	0.112324	0.140821	0.0571086	0.181509	0.0173508	rs10076149~rs10037983
Abdominal Aortic Aneurysm	chr5:78632368:78648499:clu_41245:ENSG00000145685.13	Thyroid	5:77881710:CS1	1.11113	0.112324	-0.975545	0.100596	0.246018	0.0256641	rs10076149
Abdominal Aortic Aneurysm	chr5:83512396:83519349:clu_31127:ENSG00000038427.15	Fibroblasts	5:82810884:CS1	0.997239	0.243369	-0.921162	0.00824688	0.280084	0.0683566	rs34580448
Abdominal Aortic Aneurysm	chr5:83522309:83537007:clu_31127:ENSG00000038427.15	Fibroblasts	5:82810884:CS1	0.997239	0.243369	-0.322593	0.00288807	0.280084	0.0683566	rs34580448
Abdominal Aortic Aneurysm	chr5:83522309:83537007:clu_34103:ENSG00000038427.15	Artery_Aorta	5:82810884:CS1	0.997239	0.243369	-0.363772	0.00325674	0.280084	0.0683566	rs34580448
Abdominal Aortic Aneurysm	GIN1	Fibroblasts	5:101460926:CS0	0.532257	0.0631569	-1.23673	0.499532	0.532257	0.0631569	rs386404577~rs148885155~rs71586338~rs10463984~rs2431530~rs32680~rs3733939
Abdominal Aortic Aneurysm	FER	Artery_Aorta	5:108191536:CS1	1.25079	0.165172	0.537745	0.0913223	0.650706	0.123709	rs76112574~rs6594334~rs6889967~rs72791998~rs7731891
Abdominal Aortic Aneurysm	FER	Artery_Coronary	5:108191536:CS1	1.25079	0.165172	0.0323123	0.0124544	0.107609	0.00243892	rs6594334~rs6889967~rs7731891
Abdominal Aortic Aneurysm	FER	Heart_Left_Ventricle	5:108191536:CS1	1.25079	0.165172	0.178328	0.258355	0.224337	0.0150246	rs76112574~rs6594334~rs62361304
Abdominal Aortic Aneurysm	chr5:109789048:109789460:clu_41195:ENSG00000112893.9	Lung	5:108191536:CS1	1.25079	0.165172	-0.0436148	0.0168895	0.1151	0.00288984	rs6594334~rs57885979
Abdominal Aortic Aneurysm	LOX	Fibroblasts	5:122448927:CS0	0.786097	0.0924246	0.563795	0.00124083	0.786097	0.0452895	rs840457
Abdominal Aortic Aneurysm	SNX2	Esophagus_Mucosa	5:122448927:CS0	0.788761	0.0924246	-0.841906	0.0945235	0.788761	0.0471351	rs77975796~rs144228238
Abdominal Aortic Aneurysm	chr6:36678798:36680474:clu_28508:ENSG00000124762.13	Fibroblasts	6:36648816:CS1	1.2858	0.0449658	0.0373564	0.00275895	0.0621488	0.00204627	rs4135240
Abdominal Aortic Aneurysm	chr6:36678798:36680474:clu_32702:ENSG00000124762.13	Esophagus_Mucosa	6:36648816:CS1	1.2858	0.0449658	0.0961955	0.00710451	0.0621488	0.00204627	rs4135240
Abdominal Aortic Aneurysm	chr6:36678798:36680474:clu_32758:ENSG00000124762.13	Artery_Tibial	6:36648816:CS1	1.2858	0.0449658	0.0492712	0.00363892	0.0621488	0.00204627	rs4135240
Abdominal Aortic Aneurysm	chr6:36678798:36680474:clu_34556:ENSG00000124762.13	Adipose_Visceral	6:36648816:CS1	1.2858	0.0449658	0.0502726	0.00371287	0.0621488	0.00204627	rs4135240
Abdominal Aortic Aneurysm	chr6:36678798:36680474:clu_35527:ENSG00000124762.13	Adipose_Subcutaneous	6:36648816:CS1	1.2858	0.0449658	0.0410899	0.00303469	0.0621488	0.00204627	rs4135240
Abdominal Aortic Aneurysm	chr6:36678798:36684097:clu_28508:ENSG00000124762.13	Fibroblasts	6:36648816:CS1	1.2858	0.0449658	-0.036111	0.00266698	0.0621488	0.00204627	rs4135240
Abdominal Aortic Aneurysm	chr6:36678798:36684097:clu_31015:ENSG00000124762.13	Heart_Atrial_Appendage	6:36648816:CS1	1.2858	0.0449658	-0.0552029	0.004077	0.0621488	0.00204627	rs4135240
Abdominal Aortic Aneurysm	chr6:36678798:36684097:clu_31413:ENSG00000124762.13	Artery_Aorta	6:36648816:CS1	1.2858	0.0449658	-0.0473114	0.00349418	0.0621488	0.00204627	rs4135240
Abdominal Aortic Aneurysm	chr6:36678798:36684097:clu_32702:ENSG00000124762.13	Esophagus_Mucosa	6:36648816:CS1	1.2858	0.0449658	-0.0696403	0.00514328	0.0621488	0.00204627	rs4135240
Abdominal Aortic Aneurysm	chr6:36678798:36684097:clu_32758:ENSG00000124762.13	Artery_Tibial	6:36648816:CS1	1.2858	0.0449658	-0.0693631	0.00851513	0.0711294	0.00265402	rs1321309~rs4135240
Abdominal Aortic Aneurysm	chr6:36678798:36684097:clu_34556:ENSG00000124762.13	Adipose_Visceral	6:36648816:CS1	1.2858	0.0449658	-0.0408414	0.00301634	0.0621488	0.00204627	rs4135240
Abdominal Aortic Aneurysm	chr6:36678798:36684097:clu_35527:ENSG00000124762.13	Adipose_Subcutaneous	6:36648816:CS1	1.2858	0.0449658	-0.0748813	0.00831986	0.0715382	0.00264293	rs1321309~rs4135240
Abdominal Aortic Aneurysm	chr6:36678798:36684097:clu_36491:ENSG00000124762.13	Nerve_Tibial	6:36648816:CS1	1.2858	0.0449658	-0.0431842	0.00318937	0.0621488	0.00204627	rs4135240
Abdominal Aortic Aneurysm	chr6:36678798:36684097:clu_37523:ENSG00000124762.13	Lung	6:36648816:CS1	1.2858	0.0449658	-0.0452093	0.00333893	0.0621488	0.00204627	rs4135240
Abdominal Aortic Aneurysm	chr6:36678798:36684097:clu_38040:ENSG00000124762.13	Thyroid	6:36648816:CS1	1.2858	0.0449658	-0.0461165	0.00340593	0.0621488	0.00204627	rs4135240
Abdominal Aortic Aneurysm	chr6:36678939:36680474:clu_28508:ENSG00000124762.13	Fibroblasts	6:36648816:CS1	1.2858	0.0449658	0.034483	0.00254674	0.0621488	0.00204627	rs4135240
Abdominal Aortic Aneurysm	chr6:36678939:36684097:clu_28508:ENSG00000124762.13	Fibroblasts	6:36648816:CS1	1.2858	0.0449658	0.0398965	0.0143777	0.0494179	0.00133816	rs4135240~rs10807171
Abdominal Aortic Aneurysm	chr6:36678939:36684097:clu_36491:ENSG00000124762.13	Nerve_Tibial	6:36648816:CS1	1.2858	0.0449658	0.0740356	0.0425619	0.0438714	0.00101171	rs75073268~rs4135240
Abdominal Aortic Aneurysm	chr6:36678939:36684097:clu_37523:ENSG00000124762.13	Lung	6:36648816:CS1	1.2858	0.0449658	0.434505	0.209702	0.117615	0.00662503	rs9462110~rs1321309~rs4135240~rs6457938
Abdominal Aortic Aneurysm	chr6:36678939:36684097:clu_38040:ENSG00000124762.13	Thyroid	6:36648816:CS1	1.2858	0.0449658	0.211435	0.0156155	0.0621488	0.00204627	rs4135240
Abdominal Aortic Aneurysm	RPL10A	Adipose_Subcutaneous	6:36648816:CS2	1.13735	0.0265637	0.019113	0.0176441	0.0383563	0.00038999	rs77612799~rs112754019~rs112356474
Abdominal Aortic Aneurysm	RPL10A	Artery_Aorta	6:36648816:CS2	1.13735	0.0265637	0.0807793	0.00301577	0.112474	0.00269126	rs77612799
Abdominal Aortic Aneurysm	RPL10A	Brain_Cerebellum	6:36648816:CS2	1.13735	0.0265637	0.0897918	0.00335224	0.112474	0.00269126	rs77612799
Abdominal Aortic Aneurysm	RPL10A	Colon_Sigmoid	6:36648816:CS2	1.13735	0.0265637	0.105258	0.00392966	0.112474	0.00269126	rs77612799
Abdominal Aortic Aneurysm	RPL10A	Brain_Cortex	6:36648816:CS2	1.13735	0.0265637	0.122166	0.00456087	0.112474	0.00269126	rs77612799
Abdominal Aortic Aneurysm	RPL10A	Heart_Atrial_Appendage	6:36648816:CS2	1.13735	0.0265637	0.0944103	0.00352466	0.112474	0.00269126	rs77612799
Abdominal Aortic Aneurysm	RPL10A	Heart_Left_Ventricle	6:36648816:CS2	1.13735	0.0265637	0.0963751	0.00359801	0.112474	0.00269126	rs77612799
Abdominal Aortic Aneurysm	RPL10A	Pituitary	6:36648816:CS2	1.13735	0.0265637	0.255062	0.00952236	0.112474	0.00269126	rs77612799
Abdominal Aortic Aneurysm	RPL10A	Thyroid	6:36648816:CS2	1.13735	0.0265637	0.0477773	0.0214508	0.0676724	0.00128392	rs77612799~rs112754019
Abdominal Aortic Aneurysm	chr6:35259727:35281056:clu_35465:ENSG00000065029.14	Adipose_Subcutaneous	6:36648816:CS2	1.13735	0.0265637	-0.202876	0.0318678	0.104178	0.00263367	rs77612799~rs112754019
Abdominal Aortic Aneurysm	chr6:35259841:35281056:clu_35465:ENSG00000065029.14	Adipose_Subcutaneous	6:36648816:CS2	1.13735	0.0265637	0.15914	0.00797828	0.113199	0.00278818	rs77612799~rs112754019
Abdominal Aortic Aneurysm	VEGFA	Islets	6:43806609:CS1	1.00723	0.0616592	-3.92704	0.00526117	0.87382	0.0536709	rs881858
Abdominal Aortic Aneurysm	VEGFA	Esophagus_Muscularis	6:43806609:CS2	1.1279	0.0329497	0.364002	0.0345496	0.222783	0.0069108	rs735286
Abdominal Aortic Aneurysm	VEGFA	Fibroblasts	6:43806609:CS2	1.1279	0.0329497	0.215282	0.0204337	0.222783	0.0069108	rs735286
Abdominal Aortic Aneurysm	VEGFA	Pancreas	6:43806609:CS2	1.1279	0.0329497	0.350206	0.0332402	0.222783	0.0069108	rs735286
Abdominal Aortic Aneurysm	chr6:43778918:43780732:clu_31661:ENSG00000112715.21	Muscle_Skeletal	6:43806609:CS2	1.1279	0.0329497	0.194914	0.180459	0.135324	0.00329433	rs699946~rs735286~rs3025007~rs139809493~rs3025017
Abdominal Aortic Aneurysm	chr6:43778918:43780732:clu_38388:ENSG00000112715.21	Thyroid	6:43806609:CS2	1.1279	0.0329497	0.155236	0.0147344	0.222783	0.0069108	rs735286
Abdominal Aortic Aneurysm	chr6:43782087:43784541:clu_38388:ENSG00000112715.21	Thyroid	6:43806609:CS2	1.1279	0.0329497	-0.0265215	0.0194066	0.0674343	0.000983593	rs699946~rs735286
Abdominal Aortic Aneurysm	COL21A1	Artery_Tibial	6:56102126:CS1	1.69686	0.156599	0.436998	0.112362	0.433692	0.0738508	rs12209464~rs5876494
Abdominal Aortic Aneurysm	chr6:56064622:56067295:clu_31849:ENSG00000124749.16	Artery_Aorta	6:56102126:CS1	1.69686	0.156599	0.0369491	0.02555	0.129277	0.0037588	rs12209464
Abdominal Aortic Aneurysm	chr6:56064622:56067295:clu_37009:ENSG00000124749.16	Nerve_Tibial	6:56102126:CS1	1.69686	0.156599	0.0267891	0.0185244	0.129277	0.0037588	rs12209464
Abdominal Aortic Aneurysm	chr6:56067330:56069046:clu_31849:ENSG00000124749.16	Artery_Aorta	6:56102126:CS1	1.69686	0.156599	-0.0499592	0.0345464	0.129277	0.0037588	rs12209464
Abdominal Aortic Aneurysm	chr6:56067330:56069046:clu_36035:ENSG00000124749.16	Adipose_Subcutaneous	6:56102126:CS1	1.69686	0.156599	-0.756943	0.34143	0.362303	0.0568963	rs1555130~rs12209464
Abdominal Aortic Aneurysm	chr6:56067330:56069046:clu_37009:ENSG00000124749.16	Nerve_Tibial	6:56102126:CS1	1.69686	0.156599	-0.0265103	0.0183317	0.129277	0.0037588	rs12209464
Abdominal Aortic Aneurysm	chr6:56077573:56091497:clu_31850:ENSG00000124749.16	Artery_Aorta	6:56102126:CS1	1.69686	0.156599	-0.0211797	0.0146456	0.129277	0.0037588	rs12209464
Abdominal Aortic Aneurysm	chr6:56077573:56101472:clu_31850:ENSG00000124749.16	Artery_Aorta	6:56102126:CS1	1.69686	0.156599	0.0266848	0.0184523	0.129277	0.0037588	rs12209464
Abdominal Aortic Aneurysm	chr6:56090913:56091497:clu_31850:ENSG00000124749.16	Artery_Aorta	6:56102126:CS1	1.69686	0.156599	-0.0284072	0.0218591	0.125205	0.00329861	rs77990541~rs12209464
Abdominal Aortic Aneurysm	FAM229B	Adipose_Subcutaneous	6:112398675:CS1	0.999985	0.161055	0.0347863	0.000831615	0.0303883	0.00486168	rs147163233
Abdominal Aortic Aneurysm	FAM229B	Adipose_Visceral	6:112398675:CS1	0.999985	0.161055	0.0409038	0.000977862	0.0303883	0.00486168	rs147163233
Abdominal Aortic Aneurysm	FAM229B	Adrenal_Gland	6:112398675:CS1	0.999985	0.161055	0.0372968	0.000891632	0.0303883	0.00486168	rs147163233
Abdominal Aortic Aneurysm	FAM229B	Artery_Aorta	6:112398675:CS1	0.999985	0.161055	0.0316461	0.000756544	0.0303883	0.00486168	rs147163233
Abdominal Aortic Aneurysm	FAM229B	Artery_Coronary	6:112398675:CS1	0.999985	0.161055	0.116473	0.0407401	0.0466618	0.00816523	rs147163233~rs2032564~rs7765769
Abdominal Aortic Aneurysm	FAM229B	Artery_Tibial	6:112398675:CS1	0.999985	0.161055	0.0262811	0.000628285	0.0303883	0.00486168	rs147163233
Abdominal Aortic Aneurysm	FAM229B	Colon_Sigmoid	6:112398675:CS1	0.999985	0.161055	0.0369919	0.000884341	0.0303883	0.00486168	rs147163233
Abdominal Aortic Aneurysm	FAM229B	Colon_Transverse	6:112398675:CS1	0.999985	0.161055	0.0380054	0.00841711	0.0252189	0.00397105	rs147163233~rs782316092
Abdominal Aortic Aneurysm	FAM229B	Esophagus_Junction	6:112398675:CS1	0.999985	0.161055	0.0341126	0.000815509	0.0303883	0.00486168	rs147163233
Abdominal Aortic Aneurysm	FAM229B	Esophagus_Mucosa	6:112398675:CS1	0.999985	0.161055	0.0311465	0.000744599	0.0303883	0.00486168	rs147163233
Abdominal Aortic Aneurysm	FAM229B	Esophagus_Muscularis	6:112398675:CS1	0.999985	0.161055	0.0293746	0.00070224	0.0303883	0.00486168	rs147163233
Abdominal Aortic Aneurysm	FAM229B	Fibroblasts	6:112398675:CS1	0.999985	0.161055	0.0262663	0.000627932	0.0303883	0.00486168	rs147163233
Abdominal Aortic Aneurysm	FAM229B	Lung	6:112398675:CS1	0.999985	0.161055	0.0540821	0.00129291	0.0303883	0.00486168	rs147163233
Abdominal Aortic Aneurysm	FAM229B	Muscle_Skeletal	6:112398675:CS1	0.999985	0.161055	0.0266612	0.0059102	0.022519	0.00404346	rs147163233~rs2051649~rs9387060
Abdominal Aortic Aneurysm	FAM229B	Nerve_Tibial	6:112398675:CS1	0.999985	0.161055	0.0275538	0.00065871	0.0303883	0.00486168	rs147163233
Abdominal Aortic Aneurysm	FAM229B	Pituitary	6:112398675:CS1	0.999985	0.161055	0.0407976	0.000975323	0.0303883	0.00486168	rs147163233
Abdominal Aortic Aneurysm	FAM229B	Thyroid	6:112398675:CS1	0.999985	0.161055	0.0253748	0.000606619	0.0303883	0.00486168	rs147163233
Abdominal Aortic Aneurysm	FYN	Adipose_Subcutaneous	6:112398675:CS1	0.999985	0.161055	0.0521883	0.00124763	0.0303883	0.00486168	rs147163233
Abdominal Aortic Aneurysm	FYN	Artery_Tibial	6:112398675:CS1	0.999985	0.161055	0.0382101	0.000913464	0.0303883	0.00486168	rs147163233
Abdominal Aortic Aneurysm	LAMA4	Heart_Left_Ventricle	6:112398675:CS1	0.999985	0.161055	0.0359007	0.0162607	0.0188639	0.00275153	rs147163233~rs782316092
Abdominal Aortic Aneurysm	TUBE1	Adrenal_Gland	6:112398675:CS1	0.999985	0.161055	0.0407463	0.000974097	0.0303883	0.00486168	rs147163233
Abdominal Aortic Aneurysm	TUBE1	Lung	6:112398675:CS1	0.999985	0.161055	-0.068674	0.0168031	0.0262295	0.00428529	rs147163233~rs7765769
Abdominal Aortic Aneurysm	chr6:111720062:111740981:clu_29292:ENSG00000010810.17	Whole_Blood	6:112398675:CS1	0.999985	0.161055	0.207624	0.00496354	0.0303883	0.00486168	rs147163233
Abdominal Aortic Aneurysm	chr6:112144933:112146685:clu_28675:ENSG00000112769.18	Heart_Left_Ventricle	6:112398675:CS1	0.999985	0.161055	0.0366926	0.000877186	0.0303883	0.00486168	rs147163233
Abdominal Aortic Aneurysm	chr6:112144933:112146685:clu_31803:ENSG00000112769.18	Esophagus_Junction	6:112398675:CS1	0.999985	0.161055	0.0338057	0.000808171	0.0303883	0.00486168	rs147163233
Abdominal Aortic Aneurysm	chr6:112144933:112146685:clu_32562:ENSG00000112769.18	Colon_Sigmoid	6:112398675:CS1	0.999985	0.161055	0.0328506	0.000785338	0.0303883	0.00486168	rs147163233
Abdominal Aortic Aneurysm	chr6:112144933:112146685:clu_35630:ENSG00000112769.18	Adipose_Visceral	6:112398675:CS1	0.999985	0.161055	0.0300829	0.000719172	0.0303883	0.00486168	rs147163233
Abdominal Aortic Aneurysm	chr6:112144933:112148157:clu_28675:ENSG00000112769.18	Heart_Left_Ventricle	6:112398675:CS1	0.999985	0.161055	-0.0368816	0.00302899	0.0298512	0.00486664	rs147163233~rs7765769
Abdominal Aortic Aneurysm	chr6:112144933:112148157:clu_31803:ENSG00000112769.18	Esophagus_Junction	6:112398675:CS1	0.999985	0.161055	-0.0356664	0.000852654	0.0303883	0.00486168	rs147163233
Abdominal Aortic Aneurysm	chr6:112144933:112148157:clu_32032:ENSG00000112769.18	Heart_Atrial_Appendage	6:112398675:CS1	0.999985	0.161055	-0.0427222	0.00102133	0.0303883	0.00486168	rs147163233
Abdominal Aortic Aneurysm	chr6:112144933:112148157:clu_32562:ENSG00000112769.18	Colon_Sigmoid	6:112398675:CS1	0.999985	0.161055	-0.0340037	0.000812904	0.0303883	0.00486168	rs147163233
Abdominal Aortic Aneurysm	chr6:112144933:112148157:clu_33584:ENSG00000112769.18	Esophagus_Muscularis	6:112398675:CS1	0.999985	0.161055	-0.0229122	0.00303251	0.0233087	0.00384051	rs75822547~rs73527792~rs147163233~rs75237599
Abdominal Aortic Aneurysm	chr6:112144933:112148157:clu_35630:ENSG00000112769.18	Adipose_Visceral	6:112398675:CS1	0.999985	0.161055	-0.030538	0.000730054	0.0303883	0.00486168	rs147163233
Abdominal Aortic Aneurysm	chr6:112144933:112148157:clu_37674:ENSG00000112769.18	Nerve_Tibial	6:112398675:CS1	0.999985	0.161055	-0.013846	0.00356964	0.0172365	0.0027277	rs147163233~rs191716392~rs7765769~6:112469909_AT_A
Abdominal Aortic Aneurysm	CITED2	Fibroblasts	6:140527046:CS0	0.661747	0.0717902	1.24294	0.116845	0.661747	0.0717902	rs4896494~rs17069435
Abdominal Aortic Aneurysm	chr6:160442837:160443630:clu_38427:ENSG00000146477.5	Nerve_Tibial	6:161010118:CS1	0.993582	0.220975	1.97553	0.177259	0.432055	0.0962548	rs55730499
Abdominal Aortic Aneurysm	chr6:160442869:160443630:clu_38427:ENSG00000146477.5	Nerve_Tibial	6:161010118:CS1	0.993582	0.220975	-1.97734	0.177421	0.432055	0.0962548	rs55730499
Abdominal Aortic Aneurysm	ENSG00000233225	Muscle_Skeletal	7:40831296:CS1	0.977676	0.368864	4.39224	1.59811	0.156623	0.195021	rs56725137~rs10231545~rs73125791
Abdominal Aortic Aneurysm	LINC01449	Artery_Aorta	7:40831296:CS2	0.900621	0.14837	-0.137172	0.0263195	0.152327	0.0179399	rs11531504
Abdominal Aortic Aneurysm	LINC01449	Artery_Coronary	7:40831296:CS2	0.900621	0.14837	-0.280285	0.591412	0.0755296	0.00664899	rs118072957~rs79692456~rs11531504~rs79688422
Abdominal Aortic Aneurysm	LINC01449	Artery_Tibial	7:40831296:CS2	0.900621	0.14837	-0.424014	0.139298	0.236311	0.0311329	rs79692456~rs11531504
Abdominal Aortic Aneurysm	SUGCT	Artery_Aorta	7:40831296:CS2	0.900621	0.14837	-0.103072	0.0197766	0.152327	0.0179399	rs11531504
Abdominal Aortic Aneurysm	SUGCT	Artery_Tibial	7:40831296:CS2	0.900621	0.14837	-0.370316	0.0529246	0.0518929	0.0409567	rs73128989~rs13231325~rs34692466~rs1267267~rs11531504
Abdominal Aortic Aneurysm	YAE1	Artery_Tibial	7:40831296:CS2	0.900621	0.14837	0.479061	0.0793359	0.145777	0.0235694	rs117708232~rs11531504
Abdominal Aortic Aneurysm	chr7:92086416:92089385:clu_32986:ENSG00000127914.16	Adipose_Subcutaneous	7:92248076:CS1	0.983808	0.153215	1.57644	0.587437	0.430617	0.0668777	rs6950219~rs42032
Abdominal Aortic Aneurysm	LPL	Adipose_Subcutaneous	8:19820405:CS1	1.08818	0.0595734	-0.636764	0.035043	0.544089	0.0297867	rs326
Abdominal Aortic Aneurysm	LPL	Nerve_Tibial	8:19820405:CS1	1.08818	0.0595734	-0.511336	0.0281403	0.544089	0.0297867	rs326
Abdominal Aortic Aneurysm	KCTD9	Adrenal_Gland	8:25314571:CS1	0.977924	0.087745	-0.0646955	0.0487625	0.0353447	0.00255211	rs11995050~rs57677726
Abdominal Aortic Aneurysm	KCTD9	Esophagus_Mucosa	8:25314571:CS1	0.977924	0.087745	-0.109058	0.00540821	0.103736	0.00955584	rs57677726
Abdominal Aortic Aneurysm	chr8:25368725:25369556:clu_56773:ENSG00000147459.17	Pituitary	8:25314571:CS1	0.977924	0.087745	0.314937	0.0156178	0.103736	0.00955584	rs57677726
Abdominal Aortic Aneurysm	chr8:25390287:25390831:clu_47128:ENSG00000147459.17	Whole_Blood	8:25314571:CS1	0.977924	0.087745	-0.098916	0.00490528	0.103736	0.00955584	rs57677726
Abdominal Aortic Aneurysm	chr8:25390287:25391896:clu_47128:ENSG00000147459.17	Whole_Blood	8:25314571:CS1	0.977924	0.087745	0.100812	0.00499929	0.103736	0.00955584	rs57677726
Abdominal Aortic Aneurysm	chr8:25390287:25391896:clu_61760:ENSG00000147459.17	Nerve_Tibial	8:25314571:CS1	0.977924	0.087745	0.0486832	0.0222728	0.0468095	0.00381477	rs11995050~rs57677726
Abdominal Aortic Aneurysm	chr8:25390951:25391896:clu_47128:ENSG00000147459.17	Whole_Blood	8:25314571:CS1	0.977924	0.087745	-0.0944832	0.0525187	0.047677	0.00375746	rs11995050~rs57677726
Abdominal Aortic Aneurysm	chr8:25410202:25411194:clu_63699:ENSG00000147459.17	Lung	8:25314571:CS1	0.977924	0.087745	0.0870901	0.017358	0.0806953	0.00725805	rs11995050~rs57677726
Abdominal Aortic Aneurysm	chr8:25439792:25440577:clu_53165:ENSG00000104756.15	Muscle_Skeletal	8:25314571:CS1	0.977924	0.087745	0.304243	0.0150875	0.103736	0.00955584	rs57677726
Abdominal Aortic Aneurysm	chr8:25446250:25450380:clu_59993:ENSG00000104756.15	Adipose_Subcutaneous	8:25314571:CS1	0.977924	0.087745	0.107503	0.0232982	0.0823919	0.00741241	rs11995050~rs57677726
Abdominal Aortic Aneurysm	chr8:25446250:25457301:clu_52859:ENSG00000104756.15	Artery_Aorta	8:25314571:CS1	0.977924	0.087745	0.362357	0.0179694	0.103736	0.00955584	rs57677726
Abdominal Aortic Aneurysm	chr8:25446250:25458199:clu_59993:ENSG00000104756.15	Adipose_Subcutaneous	8:25314571:CS1	0.977924	0.087745	-0.106592	0.0344787	0.0625903	0.00561513	rs11995050~rs57677726~rs12680084
Abdominal Aortic Aneurysm	CHRNA2	Brain_Cerebellum	8:27416122:CS1	0.999272	0.063745	-0.729909	0.0190054	0.999272	0.063745	rs55837792~rs3757907~rs2565064~rs58855963~rs2741336~rs11780471
Abdominal Aortic Aneurysm	DAB2IP	Adipose_Subcutaneous	9:124422403:CS1	1.0269	0.237043	-1.6366	0.596525	0.238742	0.060035	rs12553641~rs10818578
Abdominal Aortic Aneurysm	DAB2IP	Adipose_Visceral	9:124422403:CS1	1.0269	0.237043	-0.898461	0.378908	0.191796	0.0484068	rs12554469~rs12553641~rs10818578
Abdominal Aortic Aneurysm	chr9:121651899:121678678:clu_53279:ENSG00000136848.16	Esophagus_Muscularis	9:124422403:CS1	1.0269	0.237043	-2.06595	0.372824	0.325314	0.0702194	rs10818578
Abdominal Aortic Aneurysm	TRAF1	Brain_Cortex	9:124422403:CS2	1.24203	0.0593284	0.0416828	0.00679513	0.0443249	0.00167337	rs2269061~rs3761849
Abdominal Aortic Aneurysm	TRAF1	Muscle_Skeletal	9:124422403:CS2	1.24203	0.0593284	0.18576	0.0113748	0.211081	0.0176195	rs7038991~rs3761849~rs41309874
Abdominal Aortic Aneurysm	TRAF1	Nerve_Tibial	9:124422403:CS2	1.24203	0.0593284	0.0573136	0.0228048	0.0707086	0.0041349	rs7869665~rs7038991~rs116893234~rs3761849~rs113179388
Abdominal Aortic Aneurysm	chr9:120914300:120923705:clu_45894:ENSG00000056558.10	Whole_Blood	9:124422403:CS2	1.24203	0.0593284	0.0614749	0.0260128	0.0476731	0.00220605	rs780784897~rs13291203~rs76353720~rs3761849
Abdominal Aortic Aneurysm	chr9:120914300:120923705:clu_51503:ENSG00000056558.10	Artery_Aorta	9:124422403:CS2	1.24203	0.0593284	0.0425764	0.00225972	0.0482631	0.00197815	rs3761849
Abdominal Aortic Aneurysm	chr9:120914300:120923705:clu_54064:ENSG00000056558.10	Artery_Tibial	9:124422403:CS2	1.24203	0.0593284	0.0271849	0.00876443	0.0370644	0.00130151	rs780784897~rs3761849
Abdominal Aortic Aneurysm	chr9:120914300:120923705:clu_56933:ENSG00000056558.10	Adipose_Visceral	9:124422403:CS2	1.24203	0.0593284	0.0276743	0.00861314	0.0369274	0.00129152	rs780784897~rs3761849
Abdominal Aortic Aneurysm	chr9:120914300:120923705:clu_60198:ENSG00000056558.10	Nerve_Tibial	9:124422403:CS2	1.24203	0.0593284	0.0376542	0.00199848	0.0482631	0.00197815	rs3761849
Abdominal Aortic Aneurysm	chr9:120914300:120923705:clu_62573:ENSG00000056558.10	Thyroid	9:124422403:CS2	1.24203	0.0593284	0.0272335	0.00942679	0.0348576	0.00115585	rs3761849~rs12552634
Abdominal Aortic Aneurysm	chr9:120922691:120923705:clu_51503:ENSG00000056558.10	Artery_Aorta	9:124422403:CS2	1.24203	0.0593284	-0.048346	0.00256594	0.0482631	0.00197815	rs3761849
Abdominal Aortic Aneurysm	chr9:120922691:120923705:clu_54064:ENSG00000056558.10	Artery_Tibial	9:124422403:CS2	1.24203	0.0593284	-0.0232061	0.0101804	0.0309771	0.000924257	rs780784897~rs3761849
Abdominal Aortic Aneurysm	chr9:120922691:120923705:clu_60198:ENSG00000056558.10	Nerve_Tibial	9:124422403:CS2	1.24203	0.0593284	-0.035695	0.0018945	0.0482631	0.00197815	rs3761849
Abdominal Aortic Aneurysm	chr9:120922691:120923705:clu_62573:ENSG00000056558.10	Thyroid	9:124422403:CS2	1.24203	0.0593284	-0.0320416	0.00834585	0.0402236	0.00148284	rs3761849~rs12552634
Abdominal Aortic Aneurysm	chr9:120923792:120925936:clu_45895:ENSG00000056558.10	Whole_Blood	9:124422403:CS2	1.24203	0.0593284	0.0299701	0.00159065	0.0482631	0.00197815	rs3761849
Abdominal Aortic Aneurysm	chr9:120923792:120925936:clu_47220:ENSG00000056558.10	Fibroblasts	9:124422403:CS2	1.24203	0.0593284	0.0275138	0.00146028	0.0482631	0.00197815	rs3761849
Abdominal Aortic Aneurysm	chr9:120923792:120925936:clu_50659:ENSG00000056558.10	Stomach	9:124422403:CS2	1.24203	0.0593284	0.0431846	0.0401799	0.0291923	0.000750718	rs13291203~rs2269061~rs3761849~rs12552634
Abdominal Aortic Aneurysm	chr9:120923792:120925936:clu_51353:ENSG00000056558.10	Colon_Sigmoid	9:124422403:CS2	1.24203	0.0593284	0.0354154	0.00187965	0.0482631	0.00197815	rs3761849
Abdominal Aortic Aneurysm	chr9:120923792:120925936:clu_51504:ENSG00000056558.10	Artery_Aorta	9:124422403:CS2	1.24203	0.0593284	0.0284064	0.00150766	0.0482631	0.00197815	rs3761849
Abdominal Aortic Aneurysm	chr9:120923792:120925936:clu_55272:ENSG00000056558.10	Pituitary	9:124422403:CS2	1.24203	0.0593284	0.0396957	0.00210683	0.0482631	0.00197815	rs3761849
Abdominal Aortic Aneurysm	chr9:120923792:120925936:clu_55678:ENSG00000056558.10	Colon_Transverse	9:124422403:CS2	1.24203	0.0593284	0.0355195	0.00188518	0.0482631	0.00197815	rs3761849
Abdominal Aortic Aneurysm	chr9:120923792:120925936:clu_58496:ENSG00000056558.10	Adipose_Subcutaneous	9:124422403:CS2	1.24203	0.0593284	0.0287839	0.00152769	0.0482631	0.00197815	rs3761849
Abdominal Aortic Aneurysm	chr9:120923792:120925936:clu_60199:ENSG00000056558.10	Nerve_Tibial	9:124422403:CS2	1.24203	0.0593284	0.0171821	0.00264378	0.0396393	0.00140545	rs62578000~rs76978994~rs3761849~rs72758164~rs41273428~rs12553641
Abdominal Aortic Aneurysm	chr9:120923792:120925936:clu_62118:ENSG00000056558.10	Lung	9:124422403:CS2	1.24203	0.0593284	0.0263868	0.00140047	0.0482631	0.00197815	rs3761849
Abdominal Aortic Aneurysm	JMJD1C	Fibroblasts	10:64406358:CS1	0.963162	0.12022	0.893929	0.478003	0.285328	0.0471222	rs61863928~rs10995441~rs10822145~rs3211105~rs149520237~rs12354799~rs12218613~rs1255462~rs1255476
Abdominal Aortic Aneurysm	JMJD1C-AS1	Fibroblasts	10:64406358:CS1	0.963162	0.12022	0.125682	0.106569	0.0808714	0.00715507	rs10822145~rs2893923~rs2565187
Abdominal Aortic Aneurysm	JMJD1C-AS1	Thyroid	10:64406358:CS1	0.963162	0.12022	0.121905	0.643367	0.116505	0.00308327	rs1546480~rs2896495~rs10822145~rs3211105~rs149520237~rs2893923
Abdominal Aortic Aneurysm	MRPL35P2	Stomach	10:64406358:CS1	0.963162	0.12022	0.842159	0.39525	0.422911	0.0583313	rs10822145~rs3211105~rs146547865~rs149520237~rs12218613~rs2565187
Abdominal Aortic Aneurysm	NRBF2	Fibroblasts	10:64406358:CS1	0.963162	0.12022	-0.0441035	0.0410726	0.0575459	0.0045282	rs10822145
Abdominal Aortic Aneurysm	chr10:63594854:63598024:clu_9479:ENSG00000165476.13	Colon_Sigmoid	10:64406358:CS2	1.01429	0.0951868	1.03904	0.0407749	0.388443	0.035932	rs34838577
Abdominal Aortic Aneurysm	chr10:63598144:63599170:clu_9479:ENSG00000165476.13	Colon_Sigmoid	10:64406358:CS2	1.01429	0.0951868	-0.792132	0.0310855	0.388443	0.035932	rs34838577
Abdominal Aortic Aneurysm	CAMK2G	Esophagus_Mucosa	10:75673101:CS1	1.44237	0.140455	0.0399749	0.00185913	0.0633714	0.00570672	rs2664284
Abdominal Aortic Aneurysm	CAMK2G	Fibroblasts	10:75673101:CS1	1.44237	0.140455	0.0391855	0.00182242	0.0633714	0.00570672	rs2664284
Abdominal Aortic Aneurysm	NDST2	Adipose_Subcutaneous	10:75673101:CS1	1.44237	0.140455	-0.11329	0.00526882	0.0633714	0.00570672	rs2664284
Abdominal Aortic Aneurysm	NDST2	Adipose_Visceral	10:75673101:CS1	1.44237	0.140455	-0.0460013	0.0021394	0.0633714	0.00570672	rs2664284
Abdominal Aortic Aneurysm	NDST2	Esophagus_Mucosa	10:75673101:CS1	1.44237	0.140455	-0.0474016	0.00220453	0.0633714	0.00570672	rs2664284
Abdominal Aortic Aneurysm	NDST2	Lung	10:75673101:CS1	1.44237	0.140455	-0.0389451	0.00181124	0.0633714	0.00570672	rs2664284
Abdominal Aortic Aneurysm	NDST2	Whole_Blood	10:75673101:CS1	1.44237	0.140455	-0.0369863	0.00172014	0.0633714	0.00570672	rs2664284
Abdominal Aortic Aneurysm	PLAU	Fibroblasts	10:75673101:CS1	1.44237	0.140455	-0.0399765	0.005712	0.0638783	0.00594327	rs17658374~rs2664284~rs117172379
Abdominal Aortic Aneurysm	SEC24C	Fibroblasts	10:75673101:CS1	1.44237	0.140455	0.0488216	0.014769	0.0526587	0.00404113	rs10509311~rs2664284
Abdominal Aortic Aneurysm	chr10:73728587:73730318:clu_9761:ENSG00000242338.6	Artery_Aorta	10:75673101:CS1	1.44237	0.140455	0.0690194	0.0182323	0.0555328	0.00419908	rs2664284~rs2227575
Abdominal Aortic Aneurysm	chr10:73765589:73766350:clu_9182:ENSG00000176986.15	Brain_Cerebellum	10:75673101:CS1	1.44237	0.140455	0.018128	0.00989678	0.0452618	0.00241697	rs141895849~rs2664284
Abdominal Aortic Aneurysm	chr10:73766853:73767837:clu_11647:ENSG00000176986.15	Thyroid	10:75673101:CS1	1.44237	0.140455	-0.135616	0.0636239	0.0446199	0.00693077	rs11000483~rs2177843~rs2664284~rs17630952
Abdominal Aortic Aneurysm	chr10:73837511:73839539:clu_10051:ENSG00000148660.20	Esophagus_Muscularis	10:75673101:CS1	1.44237	0.140455	0.0398179	0.00185183	0.0633714	0.00570672	rs2664284
Abdominal Aortic Aneurysm	chr10:73837511:73839539:clu_10227:ENSG00000148660.20	Artery_Tibial	10:75673101:CS1	1.44237	0.140455	0.0487139	0.00226556	0.0633714	0.00570672	rs2664284
Abdominal Aortic Aneurysm	chr10:73837511:73839539:clu_9461:ENSG00000148660.20	Esophagus_Junction	10:75673101:CS1	1.44237	0.140455	0.0367873	0.0209319	0.0434265	0.00240212	rs10509311~rs2664284
Abdominal Aortic Aneurysm	chr10:73837511:73842169:clu_10051:ENSG00000148660.20	Esophagus_Muscularis	10:75673101:CS1	1.44237	0.140455	-0.0349396	0.00162495	0.0633714	0.00570672	rs2664284
Abdominal Aortic Aneurysm	chr10:73837511:73842169:clu_10227:ENSG00000148660.20	Artery_Tibial	10:75673101:CS1	1.44237	0.140455	-0.0352402	0.00163893	0.0633714	0.00570672	rs2664284
Abdominal Aortic Aneurysm	chr10:73837511:73842169:clu_9461:ENSG00000148660.20	Esophagus_Junction	10:75673101:CS1	1.44237	0.140455	-0.100254	0.0223328	0.0806345	0.0104395	rs10509311~rs2664284~rs17630952
Abdominal Aortic Aneurysm	chr10:73837511:73842169:clu_9731:ENSG00000148660.20	Colon_Sigmoid	10:75673101:CS1	1.44237	0.140455	-0.112324	0.0260275	0.0839934	0.0103505	rs2664284~rs17630952
Abdominal Aortic Aneurysm	chr10:73839601:73842169:clu_10227:ENSG00000148660.20	Artery_Tibial	10:75673101:CS1	1.44237	0.140455	0.0866239	0.0174915	0.0841915	0.0138489	rs74629413~rs2664284~rs17630952
Abdominal Aortic Aneurysm	chr10:73839601:73842169:clu_9731:ENSG00000148660.20	Colon_Sigmoid	10:75673101:CS1	1.44237	0.140455	0.141324	0.0237876	0.0761321	0.0086767	rs77191456~rs2664284
Abdominal Aortic Aneurysm	chr10:73913381:73913539:clu_11094:ENSG00000122861.15	Adipose_Subcutaneous	10:75673101:CS1	1.44237	0.140455	-0.0141524	0.00894471	0.0410363	0.00175525	rs2664284~rs2227575
Abdominal Aortic Aneurysm	LIPA	Adrenal_Gland	10:91002927:CS1	1.6875	0.201973	0.0559754	0.0954847	0.124162	0.00670528	rs1320496~rs1412444
Abdominal Aortic Aneurysm	LIPA	Artery_Aorta	10:91002927:CS1	1.6875	0.201973	1.67275	0.89128	0.316197	0.0585548	rs1320496~rs1412444
Abdominal Aortic Aneurysm	LIPA	Colon_Transverse	10:91002927:CS1	1.6875	0.201973	0.00746182	0.00247284	0.0800884	0.000907813	rs1412444
Abdominal Aortic Aneurysm	LIPA	Lung	10:91002927:CS1	1.6875	0.201973	0.00556605	0.00184459	0.0800884	0.000907813	rs1412444
Abdominal Aortic Aneurysm	LIPA	Pancreas	10:91002927:CS1	1.6875	0.201973	0.00818276	0.00271176	0.0800884	0.000907813	rs1412444
Abdominal Aortic Aneurysm	LIPA	Spleen	10:91002927:CS1	1.6875	0.201973	0.956134	0.231205	0.503999	0.113731	rs1320496~rs1412444
Abdominal Aortic Aneurysm	LIPA	Stomach	10:91002927:CS1	1.6875	0.201973	0.162673	0.186252	0.177709	0.0157315	rs1320496~rs1412444
Abdominal Aortic Aneurysm	LIPA	Whole_Blood	10:91002927:CS1	1.6875	0.201973	0.00785613	0.00362874	0.0849	0.00180435	rs1320496~rs1412444~rs192430761
Abdominal Aortic Aneurysm	chr10:89247649:89251707:clu_10913:ENSG00000107798.17	Adipose_Visceral	10:91002927:CS1	1.6875	0.201973	0.00597868	0.00198133	0.0800884	0.000907813	rs1412444
Abdominal Aortic Aneurysm	chr10:89247649:89251707:clu_11307:ENSG00000107798.17	Adipose_Subcutaneous	10:91002927:CS1	1.6875	0.201973	0.00466232	0.00154509	0.0800884	0.000907813	rs1412444
Abdominal Aortic Aneurysm	chr10:89247649:89251707:clu_11855:ENSG00000107798.17	Lung	10:91002927:CS1	1.6875	0.201973	0.00564728	0.0018715	0.0800884	0.000907813	rs1412444
Abdominal Aortic Aneurysm	NOC3L	Adrenal_Gland	10:95898827:CS2	0.951493	0.139283	-0.114813	0.128314	0.0641699	0.00631229	rs1858610~rs17516758~rs11187850
Abdominal Aortic Aneurysm	NOC3L	Colon_Sigmoid	10:95898827:CS2	0.951493	0.139283	-0.455181	0.147034	0.185546	0.0309184	rs17516758~rs11187850
Abdominal Aortic Aneurysm	NOC3L	Heart_Left_Ventricle	10:95898827:CS2	0.951493	0.139283	-0.174735	0.153462	0.10346	0.0121788	rs17516758~rs11187850
Abdominal Aortic Aneurysm	NOC3L	Pancreas	10:95898827:CS2	0.951493	0.139283	-0.420064	0.171807	0.176966	0.027231	rs17516758~rs11187850
Abdominal Aortic Aneurysm	NOC3L	Small_Intestine	10:95898827:CS2	0.951493	0.139283	-0.785352	0.320149	0.147312	0.0284311	rs17516758~rs11187850
Abdominal Aortic Aneurysm	NOC3L	Stomach	10:95898827:CS2	0.951493	0.139283	-0.555979	0.272471	0.158292	0.0240257	rs17516758~rs11187850
Abdominal Aortic Aneurysm	TBC1D12	Thyroid	10:95898827:CS2	0.951493	0.139283	0.171911	0.2061	0.115747	0.0101856	rs17516758~rs11187850
Abdominal Aortic Aneurysm	chr10:93698396:93700030:clu_11409:ENSG00000148690.11	Adipose_Subcutaneous	10:95898827:CS4	1.0056	0.0490263	-0.70156	0.00196254	0.674711	0.0329598	rs61886304
Abdominal Aortic Aneurysm	ENSG00000260461	Brain_Cerebellum	10:105640978:CS1	1.04085	0.0785249	0.29478	0.0251025	0.21399	0.0162681	rs7100920
Abdominal Aortic Aneurysm	ENSG00000260461	Brain_Cortex	10:105640978:CS1	1.04085	0.0785249	0.170414	0.156657	0.081879	0.00430429	rs12570809~rs7100920~rs140862482
Abdominal Aortic Aneurysm	ENSG00000260461	Esophagus_Mucosa	10:105640978:CS1	1.04085	0.0785249	0.269129	0.0229182	0.21399	0.0162681	rs7100920
Abdominal Aortic Aneurysm	STN1	Fibroblasts	10:105640978:CS1	1.04085	0.0785249	0.187072	0.0694297	0.211343	0.0180764	rs10883908~rs11191835~rs7100920~rs11813268
Abdominal Aortic Aneurysm	STN1	Whole_Blood	10:105640978:CS1	1.04085	0.0785249	0.162561	0.0339994	0.173814	0.012557	rs56093138~rs7100920
Abdominal Aortic Aneurysm	chr10:103897719:103898877:clu_10923:ENSG00000107960.10	Artery_Tibial	10:105640978:CS3	0.97909	0.0573947	-1.71114	0.586466	0.601555	0.0407434	rs35623220~rs10884029
Abdominal Aortic Aneurysm	chr10:103898377:103898877:clu_10923:ENSG00000107960.10	Artery_Tibial	10:105640978:CS3	0.97909	0.0573947	0.769045	0.567433	0.377535	0.0166512	rs35623220~rs10884029
Abdominal Aortic Aneurysm	BET1L	Artery_Aorta	11:199492:CS2	1.02028	0.0276413	0.243932	0.0169835	0.153915	0.00402963	rs12222188
Abdominal Aortic Aneurysm	BET1L	Colon_Sigmoid	11:199492:CS2	1.02028	0.0276413	0.53637	0.0923108	0.157952	0.00478416	rs12222188~rs6598055
Abdominal Aortic Aneurysm	BET1L	Colon_Transverse	11:199492:CS2	1.02028	0.0276413	0.433129	0.150797	0.146755	0.00413073	rs12222188~rs2178798~rs7938456~rs142487126~rs118133551
Abdominal Aortic Aneurysm	BET1L	Muscle_Skeletal	11:199492:CS2	1.02028	0.0276413	0.0856632	0.00596422	0.153915	0.00402963	rs12222188
Abdominal Aortic Aneurysm	BET1L	Nerve_Tibial	11:199492:CS2	1.02028	0.0276413	0.203721	0.0141839	0.153915	0.00402963	rs12222188
Abdominal Aortic Aneurysm	BET1L	Thyroid	11:199492:CS2	1.02028	0.0276413	0.116593	0.00811769	0.153915	0.00402963	rs12222188
Abdominal Aortic Aneurysm	chr11:27640005:27659171:clu_5512:ENSG00000245573.7	Heart_Left_Ventricle	11:27646246:CS1	1.10393	0.0810183	-0.0520885	0.00126552	0.0574606	0.004079	rs6265
Abdominal Aortic Aneurysm	chr11:27640005:27659171:clu_5823:ENSG00000245573.7	Artery_Coronary	11:27646246:CS1	1.10393	0.0810183	-0.0416288	0.0010114	0.0574606	0.004079	rs6265
Abdominal Aortic Aneurysm	chr11:27640005:27659171:clu_5899:ENSG00000245573.7	Brain_Cerebellum	11:27646246:CS1	1.10393	0.0810183	-0.0409934	0.00099596	0.0574606	0.004079	rs6265
Abdominal Aortic Aneurysm	chr11:27640005:27659171:clu_5951:ENSG00000245573.7	Fibroblasts	11:27646246:CS1	1.10393	0.0810183	-0.0301503	0.000732521	0.0574606	0.004079	rs6265
Abdominal Aortic Aneurysm	chr11:27640005:27659171:clu_6127:ENSG00000245573.7	Esophagus_Junction	11:27646246:CS1	1.10393	0.0810183	-0.0410767	0.000997985	0.0574606	0.004079	rs6265
Abdominal Aortic Aneurysm	chr11:27640005:27659171:clu_6206:ENSG00000245573.7	Stomach	11:27646246:CS1	1.10393	0.0810183	-0.0479044	0.00116387	0.0574606	0.004079	rs6265
Abdominal Aortic Aneurysm	chr11:27640005:27659171:clu_6246:ENSG00000245573.7	Heart_Atrial_Appendage	11:27646246:CS1	1.10393	0.0810183	-0.0525705	0.0178624	0.038066	0.0024022	rs11823126~rs61889601~rs6265
Abdominal Aortic Aneurysm	chr11:27640005:27659171:clu_6428:ENSG00000245573.7	Artery_Aorta	11:27646246:CS1	1.10393	0.0810183	-0.0344101	0.000836016	0.0574606	0.004079	rs6265
Abdominal Aortic Aneurysm	chr11:27640005:27659171:clu_6559:ENSG00000245573.7	Esophagus_Muscularis	11:27646246:CS1	1.10393	0.0810183	-0.0301877	0.000733429	0.0574606	0.004079	rs6265
Abdominal Aortic Aneurysm	chr11:27640005:27659171:clu_6772:ENSG00000245573.7	Artery_Tibial	11:27646246:CS1	1.10393	0.0810183	-0.0297391	0.000722531	0.0574606	0.004079	rs6265
Abdominal Aortic Aneurysm	chr11:27640005:27659171:clu_6812:ENSG00000245573.7	Colon_Transverse	11:27646246:CS1	1.10393	0.0810183	-0.0434866	0.00173568	0.0567482	0.00413646	rs11823126~rs6265
Abdominal Aortic Aneurysm	chr11:27640005:27659171:clu_7009:ENSG00000245573.7	Adipose_Visceral	11:27646246:CS1	1.10393	0.0810183	-0.0298147	0.000724368	0.0574606	0.004079	rs6265
Abdominal Aortic Aneurysm	chr11:27640005:27659171:clu_7284:ENSG00000245573.7	Adipose_Subcutaneous	11:27646246:CS1	1.10393	0.0810183	-0.0300809	0.000730834	0.0574606	0.004079	rs6265
Abdominal Aortic Aneurysm	chr11:27640005:27659171:clu_7502:ENSG00000245573.7	Nerve_Tibial	11:27646246:CS1	1.10393	0.0810183	-0.0228745	0.00055575	0.0574606	0.004079	rs6265
Abdominal Aortic Aneurysm	chr11:27640005:27659171:clu_7592:ENSG00000245573.7	Lung	11:27646246:CS1	1.10393	0.0810183	-0.0291311	0.000707758	0.0574606	0.004079	rs6265
Abdominal Aortic Aneurysm	chr11:27640005:27659171:clu_7628:ENSG00000245573.7	Thyroid	11:27646246:CS1	1.10393	0.0810183	-0.0230748	0.000560617	0.0574606	0.004079	rs6265
Abdominal Aortic Aneurysm	chr11:27658462:27659171:clu_5951:ENSG00000245573.7	Fibroblasts	11:27646246:CS1	1.10393	0.0810183	0.058888	0.00143072	0.0574606	0.004079	rs6265
Abdominal Aortic Aneurysm	chr11:27658462:27659171:clu_7502:ENSG00000245573.7	Nerve_Tibial	11:27646246:CS1	1.10393	0.0810183	0.0909201	0.0167478	0.0647509	0.00569173	rs35548939~rs11823126~rs1387144~rs6265
Abdominal Aortic Aneurysm	chr11:27658462:27659171:clu_7628:ENSG00000245573.7	Thyroid	11:27646246:CS1	1.10393	0.0810183	0.10155	0.0130728	0.082459	0.0076029	rs1387144~rs6265
Abdominal Aortic Aneurysm	ATG13	Stomach	11:46379442:CS1	0.92382	0.123534	-0.329096	0.0338396	0.139062	0.0192402	rs11038871~rs34406563
Abdominal Aortic Aneurysm	MDK	Fibroblasts	11:46379442:CS1	0.92382	0.123534	-0.333278	0.017286	0.114076	0.0149945	rs11038871
Abdominal Aortic Aneurysm	chr11:46361706:46366244:clu_6467:ENSG00000149091.15	Muscle_Skeletal	11:46379442:CS1	0.92382	0.123534	-0.185342	0.00961307	0.114076	0.0149945	rs11038871
Abdominal Aortic Aneurysm	chr11:46362651:46367291:clu_6467:ENSG00000149091.15	Muscle_Skeletal	11:46379442:CS1	0.92382	0.123534	0.230355	0.0119477	0.114076	0.0149945	rs11038871
Abdominal Aortic Aneurysm	chr11:46369550:46371313:clu_7456:ENSG00000149091.15	Adipose_Subcutaneous	11:46379442:CS1	0.92382	0.123534	-0.204733	0.0106188	0.114076	0.0149945	rs11038871
Abdominal Aortic Aneurysm	chr11:47270246:47273827:clu_5764:ENSG00000110514.19	Whole_Blood	11:46379442:CS1	0.92382	0.123534	0.324778	0.0576868	0.118466	0.0167136	rs3835060~rs772108238~rs11038871
Abdominal Aortic Aneurysm	ACP2	Esophagus_Mucosa	11:46379442:CS3	0.94904	0.0262816	-0.00521084	0.000870664	0.00972745	0.000326002	rs7123635~rs2291120~rs2306353~rs35677603
Abdominal Aortic Aneurysm	ACP2	Heart_Left_Ventricle	11:46379442:CS3	0.94904	0.0262816	-0.0102967	0.00670263	0.00673441	0.000213389	rs10838612~rs17787912~rs56132601~rs10838649~rs112158599~rs2306353~rs10838681
Abdominal Aortic Aneurysm	ACP2	Kidney_Tube	11:46379442:CS3	0.94904	0.0262816	-0.00701615	0.00104544	0.00822158	0.000235075	rs2306353~rs10838681
Abdominal Aortic Aneurysm	ACP2	Spleen	11:46379442:CS3	0.94904	0.0262816	-0.00423582	0.00187495	0.004094	0.000104551	rs2306353~rs10838681
Abdominal Aortic Aneurysm	ACP2	Thyroid	11:46379442:CS3	0.94904	0.0262816	-0.00665408	0.000219613	0.00952176	0.000258212	rs2306353
Abdominal Aortic Aneurysm	DDB2	Kidney_Tube	11:46379442:CS3	0.94904	0.0262816	0.00685588	0.000338694	0.00948536	0.000262094	rs2306353~rs10838681
Abdominal Aortic Aneurysm	DDB2	Whole_Blood	11:46379442:CS3	0.94904	0.0262816	-0.0160418	0.0036552	0.00855046	0.000258002	rs7111517~rs79905736~rs2306353~rs10838681~rs542584280
Abdominal Aortic Aneurysm	ENSG00000256897	Heart_Atrial_Appendage	11:46379442:CS3	0.94904	0.0262816	-0.00394312	0.00209989	0.00379719	9.3049e-05	rs2306353~rs10838681
Abdominal Aortic Aneurysm	MADD	Brain_Cerebellum	11:46379442:CS3	0.94904	0.0262816	-0.00493591	0.00233069	0.00824012	0.000257892	rs2306353~rs10838681~rs35233100
Abdominal Aortic Aneurysm	MADD	Heart_Atrial_Appendage	11:46379442:CS3	0.94904	0.0262816	-0.00724197	0.000559559	0.00909294	0.000256878	rs2306353~rs10838681
Abdominal Aortic Aneurysm	NR1H3	Adipose_Subcutaneous	11:46379442:CS3	0.94904	0.0262816	0.0104164	0.00132072	0.00971951	0.0002884	rs7111517~rs2306353~rs10838681
Abdominal Aortic Aneurysm	NR1H3	Colon_Sigmoid	11:46379442:CS3	0.94904	0.0262816	0.00797749	0.00223256	0.00636079	0.000182829	rs79905736~rs2306353~rs10838681
Abdominal Aortic Aneurysm	NR1H3	Heart_Atrial_Appendage	11:46379442:CS3	0.94904	0.0262816	0.00822687	0.000476239	0.00931262	0.000259741	rs2306353~rs10838681
Abdominal Aortic Aneurysm	NR1H3	Nerve_Tibial	11:46379442:CS3	0.94904	0.0262816	0.00857103	0.00313303	0.01783	0.000794017	rs61882671~rs148373547~rs575694260~rs61884303~rs187481936~rs112158599~rs72901605~rs2306353~rs7944419~rs11570034~rs2293576
Abdominal Aortic Aneurysm	chr11:47137560:47137645:clu_6995:ENSG00000149179.13	Pituitary	11:46379442:CS3	0.94904	0.0262816	0.0132638	0.00119379	0.0139437	0.000406666	rs10838612~rs2306353
Abdominal Aortic Aneurysm	chr11:47235412:47237619:clu_6334:ENSG00000134574.11	Esophagus_Junction	11:46379442:CS3	0.94904	0.0262816	-0.0079875	0.000370065	0.00943851	0.000262109	rs2306353~rs10838681
Abdominal Aortic Aneurysm	chr11:47235412:47237619:clu_6488:ENSG00000134574.11	Colon_Sigmoid	11:46379442:CS3	0.94904	0.0262816	-0.0094305	0.000311246	0.00952176	0.000258212	rs2306353
Abdominal Aortic Aneurysm	chr11:47235412:47237619:clu_6646:ENSG00000134574.11	Artery_Aorta	11:46379442:CS3	0.94904	0.0262816	-0.00738209	0.00024364	0.00952176	0.000258212	rs2306353
Abdominal Aortic Aneurysm	chr11:47235412:47237619:clu_6772:ENSG00000134574.11	Esophagus_Muscularis	11:46379442:CS3	0.94904	0.0262816	-0.00702042	0.000231704	0.00952176	0.000258212	rs2306353
Abdominal Aortic Aneurysm	chr11:47235412:47237619:clu_6989:ENSG00000134574.11	Artery_Tibial	11:46379442:CS3	0.94904	0.0262816	-0.00708634	0.000233879	0.00952176	0.000258212	rs2306353
Abdominal Aortic Aneurysm	chr11:47235412:47237619:clu_7043:ENSG00000134574.11	Colon_Transverse	11:46379442:CS3	0.94904	0.0262816	-0.00625183	0.00186163	0.00669545	0.000171497	rs2306353~rs10838681~rs17790804
Abdominal Aortic Aneurysm	chr11:47235412:47237619:clu_7501:ENSG00000134574.11	Adipose_Subcutaneous	11:46379442:CS3	0.94904	0.0262816	-0.00673832	0.000222393	0.00952176	0.000258212	rs2306353
Abdominal Aortic Aneurysm	chr11:47235412:47237619:clu_7742:ENSG00000134574.11	Nerve_Tibial	11:46379442:CS3	0.94904	0.0262816	-0.00711879	0.00023495	0.00952176	0.000258212	rs2306353
Abdominal Aortic Aneurysm	chr11:47235412:47237837:clu_5710:ENSG00000134574.11	Heart_Left_Ventricle	11:46379442:CS3	0.94904	0.0262816	0.0121687	0.00040162	0.00952176	0.000258212	rs2306353
Abdominal Aortic Aneurysm	chr11:47235412:47237837:clu_6019:ENSG00000134574.11	Spleen	11:46379442:CS3	0.94904	0.0262816	0.00781126	0.000257805	0.00952176	0.000258212	rs2306353
Abdominal Aortic Aneurysm	chr11:47235412:47237837:clu_6334:ENSG00000134574.11	Esophagus_Junction	11:46379442:CS3	0.94904	0.0262816	0.0102408	0.000434264	0.00949258	0.000262152	rs2306353~rs10838681
Abdominal Aortic Aneurysm	chr11:47235412:47237837:clu_6531:ENSG00000134574.11	Muscle_Skeletal	11:46379442:CS3	0.94904	0.0262816	0.00596707	0.000196939	0.00952176	0.000258212	rs2306353
Abdominal Aortic Aneurysm	chr11:47235412:47237837:clu_6646:ENSG00000134574.11	Artery_Aorta	11:46379442:CS3	0.94904	0.0262816	0.0085815	0.00042271	0.00944217	0.000262105	rs2306353~rs10838681
Abdominal Aortic Aneurysm	chr11:47235412:47237837:clu_6772:ENSG00000134574.11	Esophagus_Muscularis	11:46379442:CS3	0.94904	0.0262816	0.00673863	0.000222403	0.00952176	0.000258212	rs2306353
Abdominal Aortic Aneurysm	chr11:47235412:47237837:clu_7001:ENSG00000134574.11	Pituitary	11:46379442:CS3	0.94904	0.0262816	0.0193272	0.00063788	0.00952176	0.000258212	rs2306353
Abdominal Aortic Aneurysm	chr11:47235412:47237837:clu_7230:ENSG00000134574.11	Adipose_Visceral	11:46379442:CS3	0.94904	0.0262816	0.00704093	0.000232381	0.00952176	0.000258212	rs2306353
Abdominal Aortic Aneurysm	chr11:47235412:47237837:clu_7501:ENSG00000134574.11	Adipose_Subcutaneous	11:46379442:CS3	0.94904	0.0262816	0.00813394	0.000268455	0.00952176	0.000258212	rs2306353
Abdominal Aortic Aneurysm	chr11:47235412:47237837:clu_7742:ENSG00000134574.11	Nerve_Tibial	11:46379442:CS3	0.94904	0.0262816	0.00655434	0.000216321	0.00952176	0.000258212	rs2306353
Abdominal Aortic Aneurysm	chr11:47235412:47237837:clu_7841:ENSG00000134574.11	Lung	11:46379442:CS3	0.94904	0.0262816	0.00572613	0.000188987	0.00952176	0.000258212	rs2306353
Abdominal Aortic Aneurysm	chr11:47235412:47237837:clu_7891:ENSG00000134574.11	Thyroid	11:46379442:CS3	0.94904	0.0262816	0.00704426	0.00278095	0.00613568	0.000132381	rs2306353~rs11039216
Abdominal Aortic Aneurysm	chr11:47237712:47237837:clu_4778:ENSG00000134574.11	Liver	11:46379442:CS3	0.94904	0.0262816	-0.0063264	0.00190423	0.00692873	0.000172798	rs2306353~rs10838681~rs17790804
Abdominal Aortic Aneurysm	chr11:47237712:47237837:clu_5566:ENSG00000134574.11	Pancreas	11:46379442:CS3	0.94904	0.0262816	-0.00879515	0.000938256	0.00857301	0.00023052	rs2306353~rs542584280
Abdominal Aortic Aneurysm	chr11:47237712:47237837:clu_5710:ENSG00000134574.11	Heart_Left_Ventricle	11:46379442:CS3	0.94904	0.0262816	-0.00633328	0.000209025	0.00952176	0.000258212	rs2306353
Abdominal Aortic Aneurysm	chr11:47237712:47237837:clu_5720:ENSG00000134574.11	Adrenal_Gland	11:46379442:CS3	0.94904	0.0262816	-0.00773239	0.000255202	0.00952176	0.000258212	rs2306353
Abdominal Aortic Aneurysm	chr11:47237712:47237837:clu_5754:ENSG00000134574.11	Whole_Blood	11:46379442:CS3	0.94904	0.0262816	-0.00472224	0.000155854	0.00952176	0.000258212	rs2306353
Abdominal Aortic Aneurysm	chr11:47237712:47237837:clu_6019:ENSG00000134574.11	Spleen	11:46379442:CS3	0.94904	0.0262816	-0.00765935	0.000252791	0.00952176	0.000258212	rs2306353
Abdominal Aortic Aneurysm	chr11:47237712:47237837:clu_6026:ENSG00000134574.11	Artery_Coronary	11:46379442:CS3	0.94904	0.0262816	-0.00873078	0.000493235	0.00933595	0.000261088	rs2306353~rs10838681
Abdominal Aortic Aneurysm	chr11:47237712:47237837:clu_6140:ENSG00000134574.11	Brain_Cerebellum	11:46379442:CS3	0.94904	0.0262816	-0.00734982	0.00097079	0.00843274	0.000239081	rs2306353~rs10838681
Abdominal Aortic Aneurysm	chr11:47237712:47237837:clu_6152:ENSG00000134574.11	Fibroblasts	11:46379442:CS3	0.94904	0.0262816	-0.00593916	0.000196017	0.00952176	0.000258212	rs2306353
Abdominal Aortic Aneurysm	chr11:47237712:47237837:clu_6334:ENSG00000134574.11	Esophagus_Junction	11:46379442:CS3	0.94904	0.0262816	-0.005966	0.000196903	0.00952176	0.000258212	rs2306353
Abdominal Aortic Aneurysm	chr11:47237712:47237837:clu_6424:ENSG00000134574.11	Stomach	11:46379442:CS3	0.94904	0.0262816	-0.00802821	0.000264965	0.00952176	0.000258212	rs2306353
Abdominal Aortic Aneurysm	chr11:47237712:47237837:clu_6462:ENSG00000134574.11	Heart_Atrial_Appendage	11:46379442:CS3	0.94904	0.0262816	-0.00599013	0.0001977	0.00952176	0.000258212	rs2306353
Abdominal Aortic Aneurysm	chr11:47237712:47237837:clu_6488:ENSG00000134574.11	Colon_Sigmoid	11:46379442:CS3	0.94904	0.0262816	-0.00697988	0.000282883	0.00947611	0.000262193	rs2306353~rs10838681
Abdominal Aortic Aneurysm	chr11:47237712:47237837:clu_6531:ENSG00000134574.11	Muscle_Skeletal	11:46379442:CS3	0.94904	0.0262816	-0.00463756	0.000153059	0.00952176	0.000258212	rs2306353
Abdominal Aortic Aneurysm	chr11:47237712:47237837:clu_6622:ENSG00000134574.11	Esophagus_Mucosa	11:46379442:CS3	0.94904	0.0262816	-0.00506651	0.000167216	0.00952176	0.000258212	rs2306353
Abdominal Aortic Aneurysm	chr11:47237712:47237837:clu_6646:ENSG00000134574.11	Artery_Aorta	11:46379442:CS3	0.94904	0.0262816	-0.00509307	0.000168093	0.00952176	0.000258212	rs2306353
Abdominal Aortic Aneurysm	chr11:47237712:47237837:clu_6772:ENSG00000134574.11	Esophagus_Muscularis	11:46379442:CS3	0.94904	0.0262816	-0.0050241	0.000165817	0.00952176	0.000258212	rs2306353
Abdominal Aortic Aneurysm	chr11:47237712:47237837:clu_6989:ENSG00000134574.11	Artery_Tibial	11:46379442:CS3	0.94904	0.0262816	-0.00485015	0.000160076	0.00952176	0.000258212	rs2306353
Abdominal Aortic Aneurysm	chr11:47237712:47237837:clu_7001:ENSG00000134574.11	Pituitary	11:46379442:CS3	0.94904	0.0262816	-0.00656093	0.000216539	0.00952176	0.000258212	rs2306353
Abdominal Aortic Aneurysm	chr11:47237712:47237837:clu_7043:ENSG00000134574.11	Colon_Transverse	11:46379442:CS3	0.94904	0.0262816	-0.00608837	0.000200942	0.00952176	0.000258212	rs2306353
Abdominal Aortic Aneurysm	chr11:47237712:47237837:clu_7230:ENSG00000134574.11	Adipose_Visceral	11:46379442:CS3	0.94904	0.0262816	-0.00486533	0.000160577	0.00952176	0.000258212	rs2306353
Abdominal Aortic Aneurysm	chr11:47237712:47237837:clu_7501:ENSG00000134574.11	Adipose_Subcutaneous	11:46379442:CS3	0.94904	0.0262816	-0.00477536	0.000157607	0.00952176	0.000258212	rs2306353
Abdominal Aortic Aneurysm	chr11:47237712:47237837:clu_7742:ENSG00000134574.11	Nerve_Tibial	11:46379442:CS3	0.94904	0.0262816	-0.00443249	0.000146291	0.00952176	0.000258212	rs2306353
Abdominal Aortic Aneurysm	chr11:47237712:47237837:clu_7841:ENSG00000134574.11	Lung	11:46379442:CS3	0.94904	0.0262816	-0.00276577	0.000557153	0.00577432	0.000123345	rs79568491~rs11038871~rs34406563~rs2306353
Abdominal Aortic Aneurysm	chr11:47237712:47237837:clu_7891:ENSG00000134574.11	Thyroid	11:46379442:CS3	0.94904	0.0262816	-0.00513205	0.00016938	0.00952176	0.000258212	rs2306353
Abdominal Aortic Aneurysm	chr11:47243321:47245305:clu_6654:ENSG00000134575.9	Artery_Aorta	11:46379442:CS3	0.94904	0.0262816	-0.00842639	0.0021398	0.00648292	0.000181032	rs2306353~rs10838681
Abdominal Aortic Aneurysm	chr11:47243321:47245305:clu_6995:ENSG00000134575.9	Artery_Tibial	11:46379442:CS3	0.94904	0.0262816	-0.00944729	0.000311801	0.00952176	0.000258212	rs2306353
Abdominal Aortic Aneurysm	chr11:47243321:47245305:clu_7895:ENSG00000134575.9	Thyroid	11:46379442:CS3	0.94904	0.0262816	-0.0182079	0.000600939	0.00952176	0.000258212	rs2306353
Abdominal Aortic Aneurysm	chr11:47244951:47245305:clu_6027:ENSG00000134575.9	Spleen	11:46379442:CS3	0.94904	0.0262816	0.00496739	0.00259298	0.00426159	8.88255e-05	rs2306353~rs17790804
Abdominal Aortic Aneurysm	chr11:47248999:47259180:clu_7898:ENSG00000025434.18	Thyroid	11:46379442:CS3	0.94904	0.0262816	-0.00865834	0.00456	0.00422654	0.000108112	rs10838612~rs79905736~rs2306353~rs10838681
Abdominal Aortic Aneurysm	chr11:47248999:47261241:clu_6154:ENSG00000025434.18	Fibroblasts	11:46379442:CS3	0.94904	0.0262816	0.0226177	0.00335074	0.0103898	0.000330916	rs7111517~rs2306353~rs10838681
Abdominal Aortic Aneurysm	chr11:47258129:47259180:clu_7752:ENSG00000025434.18	Nerve_Tibial	11:46379442:CS3	0.94904	0.0262816	-0.00675722	0.000365996	0.009381	0.000261786	rs2306353~rs10838681
Abdominal Aortic Aneurysm	chr11:47258129:47259791:clu_6020:ENSG00000025434.18	Spleen	11:46379442:CS3	0.94904	0.0262816	0.00815224	0.000504166	0.00926606	0.000259583	rs2306353~rs10838681
Abdominal Aortic Aneurysm	chr11:47258129:47259791:clu_6031:ENSG00000025434.18	Artery_Coronary	11:46379442:CS3	0.94904	0.0262816	0.0192158	0.00361949	0.0082157	0.000237308	rs2306353~rs10838681
Abdominal Aortic Aneurysm	chr11:47258129:47259791:clu_6778:ENSG00000025434.18	Esophagus_Muscularis	11:46379442:CS3	0.94904	0.0262816	0.00324165	0.0015037	0.00378379	9.45687e-05	rs2306353~rs10838681
Abdominal Aortic Aneurysm	chr11:47258129:47259791:clu_7237:ENSG00000025434.18	Adipose_Visceral	11:46379442:CS3	0.94904	0.0262816	0.00530243	0.000288069	0.00935193	0.00026144	rs2306353~rs10838681
Abdominal Aortic Aneurysm	chr11:47258129:47259791:clu_7898:ENSG00000025434.18	Thyroid	11:46379442:CS3	0.94904	0.0262816	0.00575428	0.000256721	0.00946929	0.000262184	rs2306353~rs10838681
Abdominal Aortic Aneurysm	chr11:47259259:47259791:clu_6340:ENSG00000025434.18	Esophagus_Junction	11:46379442:CS3	0.94904	0.0262816	-0.012532	0.000506093	0.00948483	0.000261945	rs2306353~rs10838681
Abdominal Aortic Aneurysm	chr11:47259259:47259791:clu_6467:ENSG00000025434.18	Heart_Atrial_Appendage	11:46379442:CS3	0.94904	0.0262816	-0.00906814	0.00241067	0.00674763	0.000193338	rs79905736~rs2306353~rs10838681
Abdominal Aortic Aneurysm	chr11:47259259:47259791:clu_6495:ENSG00000025434.18	Colon_Sigmoid	11:46379442:CS3	0.94904	0.0262816	-0.0124528	0.00160854	0.0115941	0.000322004	rs10838612~rs2306353
Abdominal Aortic Aneurysm	chr11:47259259:47259791:clu_6536:ENSG00000025434.18	Muscle_Skeletal	11:46379442:CS3	0.94904	0.0262816	-0.0212101	0.000700022	0.00952176	0.000258212	rs2306353
Abdominal Aortic Aneurysm	chr11:47259259:47259791:clu_7007:ENSG00000025434.18	Pituitary	11:46379442:CS3	0.94904	0.0262816	-0.0164828	0.00412758	0.00690116	0.000194516	rs2306353~rs10838681
Abdominal Aortic Aneurysm	chr11:47259259:47259791:clu_7049:ENSG00000025434.18	Colon_Transverse	11:46379442:CS3	0.94904	0.0262816	-0.00882175	0.000542819	0.00920617	0.000259217	rs2306353~rs10838681
Abdominal Aortic Aneurysm	chr11:47259259:47259791:clu_7507:ENSG00000025434.18	Adipose_Subcutaneous	11:46379442:CS3	0.94904	0.0262816	-0.0051451	0.00016981	0.00952176	0.000258212	rs2306353
Abdominal Aortic Aneurysm	chr11:47259259:47259791:clu_7752:ENSG00000025434.18	Nerve_Tibial	11:46379442:CS3	0.94904	0.0262816	-0.00492502	0.000162547	0.00952176	0.000258212	rs2306353
Abdominal Aortic Aneurysm	chr11:47259259:47259791:clu_7898:ENSG00000025434.18	Thyroid	11:46379442:CS3	0.94904	0.0262816	-0.0030453	0.00116211	0.00498189	0.000132278	rs2306353~rs10838681
Abdominal Aortic Aneurysm	chr11:47259979:47260409:clu_7238:ENSG00000025434.18	Adipose_Visceral	11:46379442:CS3	0.94904	0.0262816	-0.00818187	0.000270037	0.00952176	0.000258212	rs2306353
Abdominal Aortic Aneurysm	chr11:47259979:47260409:clu_7507:ENSG00000025434.18	Adipose_Subcutaneous	11:46379442:CS3	0.94904	0.0262816	-0.00738501	0.000243737	0.00952176	0.000258212	rs2306353
Abdominal Aortic Aneurysm	chr11:47259979:47260409:clu_7752:ENSG00000025434.18	Nerve_Tibial	11:46379442:CS3	0.94904	0.0262816	-0.0111313	0.00125145	0.00851321	0.000228278	rs2306353~rs542584280
Abdominal Aortic Aneurysm	chr11:47259979:47261241:clu_5726:ENSG00000025434.18	Adrenal_Gland	11:46379442:CS3	0.94904	0.0262816	0.00495181	0.00182645	0.00551748	0.000134586	rs2306353~rs10838681~rs17790804
[truncated: 265,705+ more rows]

## Sheet: Table S5
Table S5. Direct causal variants identified by TGVIS.
[truncated: 7,662 more rows]

[truncated: 16 more sheets: Table S6, Table S7, Table S8, Table S9, Table S10, Table S11, Table S12, Table S13, Table S14, Table S15, Table S16, Table S17, Table S18, Table S19, Table S20, Table S21]
